# Supplementary material for: Single-cell transcriptomes of zebrafish germline reveal progenitor types and feminization by Foxl2l
Source: eLife journal article supplement (doi:10.7554/elife.100204), 2025-06-11
Supplement: supp [file elife-100204-supp-v1.zip]

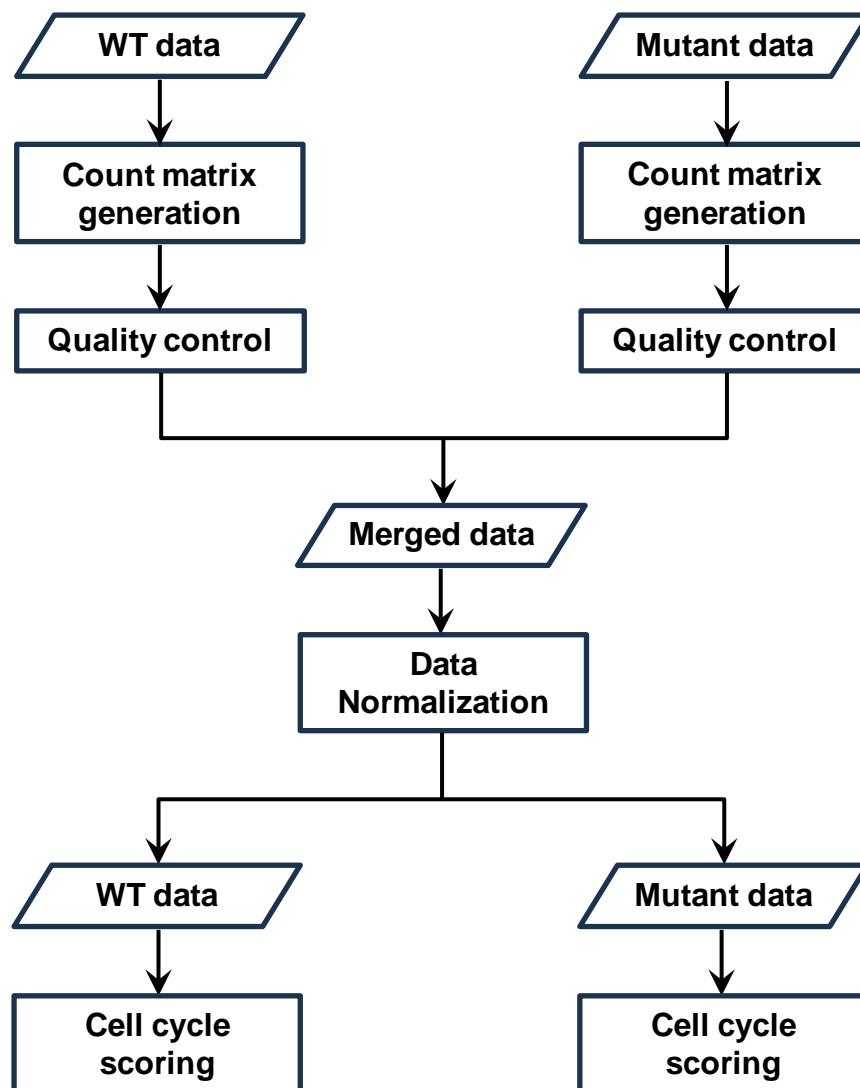

**Figure 3—Figure Supplement 3. The flow chart of data processing and cell cycle scoring for WT and mutant scRNAseq transcriptome**
