# Supplementary material for: Single-cell transcriptomes of zebrafish germline reveal progenitor types and feminization by Foxl2l
Source: eLife journal article supplement (doi:10.7554/elife.100204), 2025-06-11
Supplement: supp [file elife-100204-supp-v1.zip]

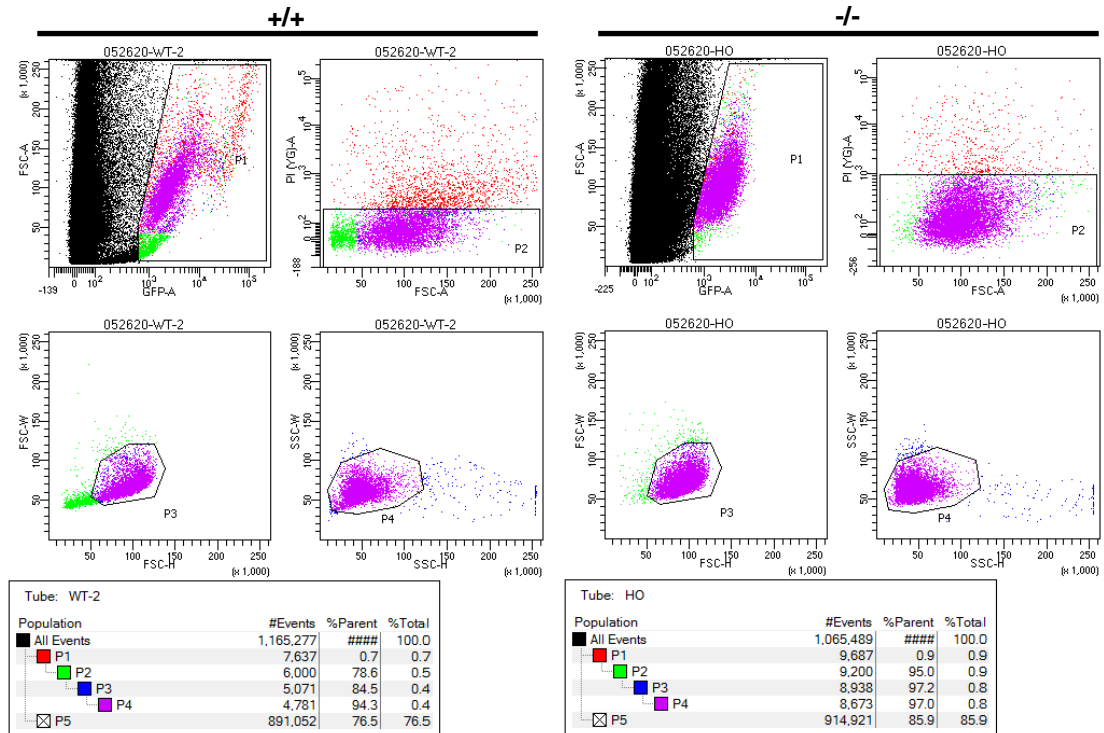

**Figure 1—Figure Supplement 1. Germ cell sorted by Fluorescence-Activated Cell Sorting (FACS).**

Sorting of fluorescent germ cell from 26-dpf gonad by FACS. Cells within the rectangular or irregular box were selected. Pseudocolors indicates four different gating, P1 to P4. After gating, germ cells from WT (+/+) or *foxl2*<sup>10i/10i</sup> (-/-) with *piwil1:egfp* transgenic background were collected.
