# Supplementary material for: Single-cell transcriptomes of zebrafish germline reveal progenitor types and feminization by Foxl2l
Source: eLife journal article supplement (doi:10.7554/elife.100204), 2025-06-11
Supplement: supp [file elife-100204-supp-v1.zip]

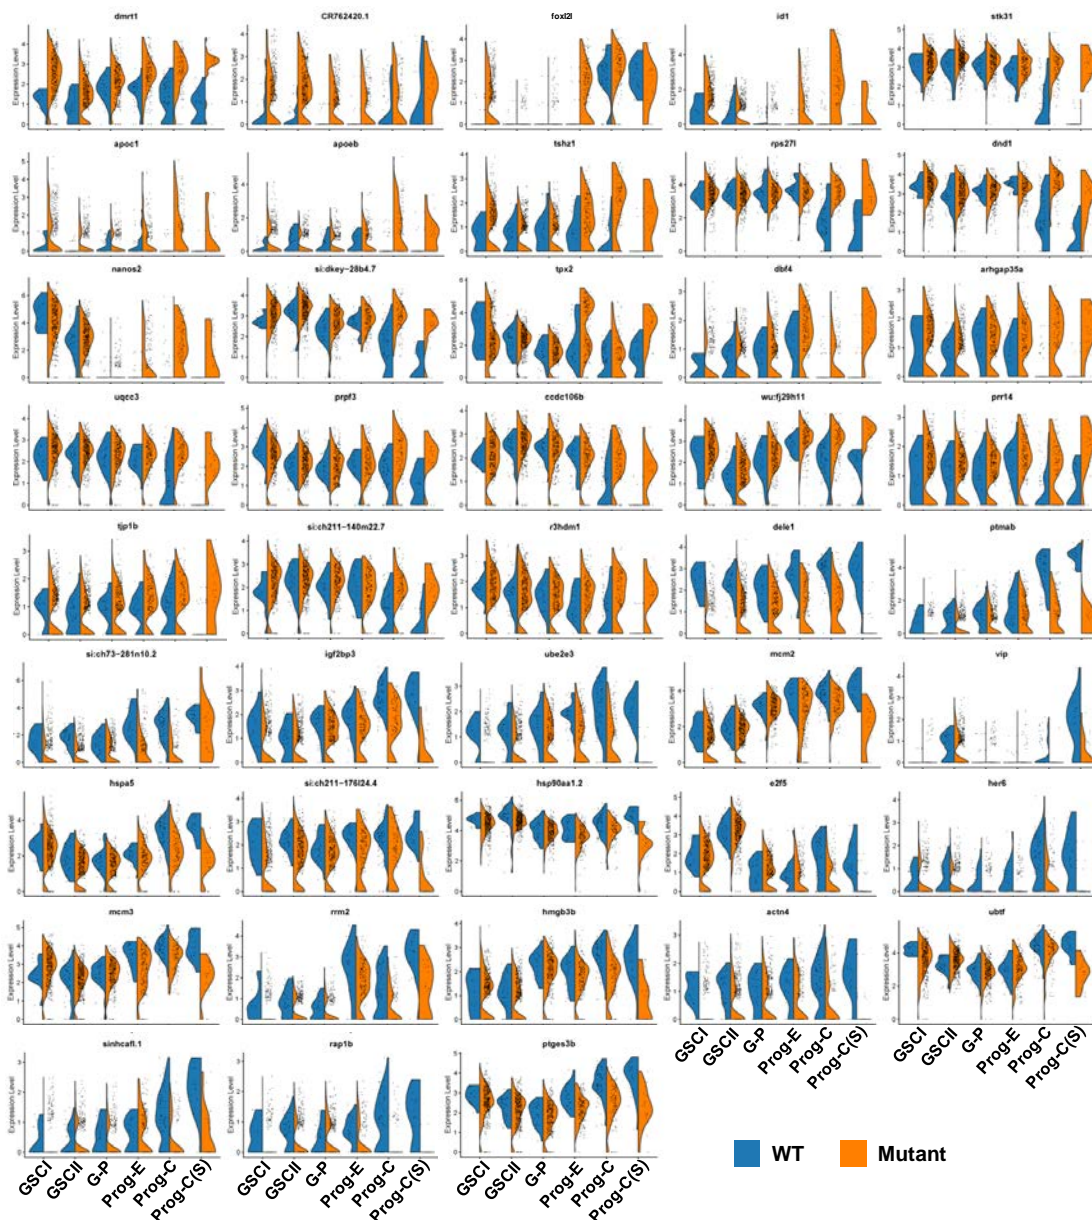

**Figure 4—Figure Supplement 1. Expression of DEGs in WT and mutant germ cell.**

Split-violin plots showing the distribution of WT and mutant cells expressing DEGs at different developmental stages (X-axis).
