# Supplementary material for: Single-cell transcriptomes of zebrafish germline reveal progenitor types and feminization by Foxl2l
Source: eLife journal article supplement (doi:10.7554/elife.100204), 2025-06-11
Supplement: supp [file elife-100204-supp-v1.zip]

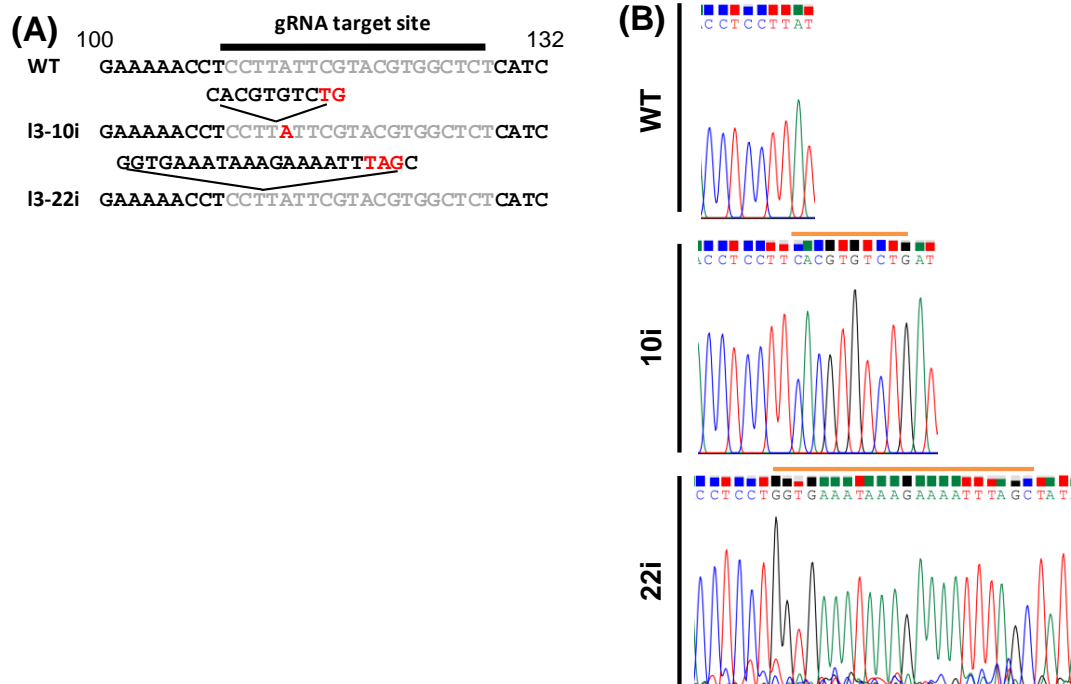

**Figure 2—Figure Supplement 1. Generation and the phenotype analysis of *foxl2l* mutant.**

**(A)** The *foxl2l* sequence of WT and two *foxl2l* mutant lines, 10 base pairs insertion (10i) and 22 base pairs insertion (22i). Gray letters represent gRNA targeting region. Red letters represent stop codons. **(B)** Sequencing results of WT and two *foxl2l* mutant lines, 10i and 22i. The inserted sequences are marked with horizontal orange lines.
