# Supplementary material for: Single-cell transcriptomes of zebrafish germline reveal progenitor types and feminization by Foxl2l
Source: eLife journal article supplement (doi:10.7554/elife.100204), 2025-06-11
Supplement: supp [file elife-100204-supp-v1.zip]

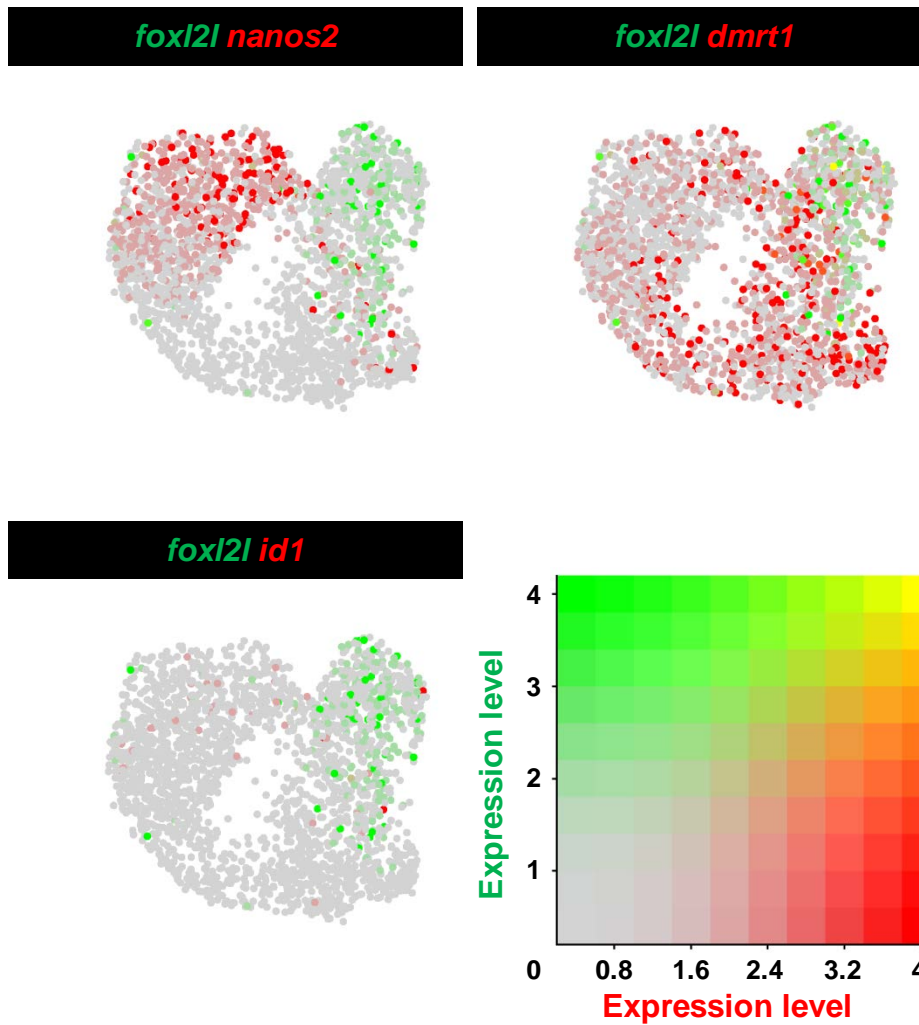

**Figure 5—Figure Supplement 1. Very few germ cells express *foxl2l* together with *nanos2*, *id1* or *dmrt1* in 40-dpf WT gonad.**

Expression profile of *foxl2l* with *nanos2*, *id1* or *dmrt1* in 40-dpf germ cell shown in UMAP. The data was obtained from a published database (<https://www.ncbi.nlm.nih.gov/geo/query/acc.cgi?acc=GSE191137>). The expression values are visualized by colors ranging between 4 to 0.
