# Supplementary material for: Single-cell transcriptomes of zebrafish germline reveal progenitor types and feminization by Foxl2l
Source: eLife journal article supplement (doi:10.7554/elife.100204), 2025-06-11
Supplement: supp [file elife-100204-supp-v1.zip]

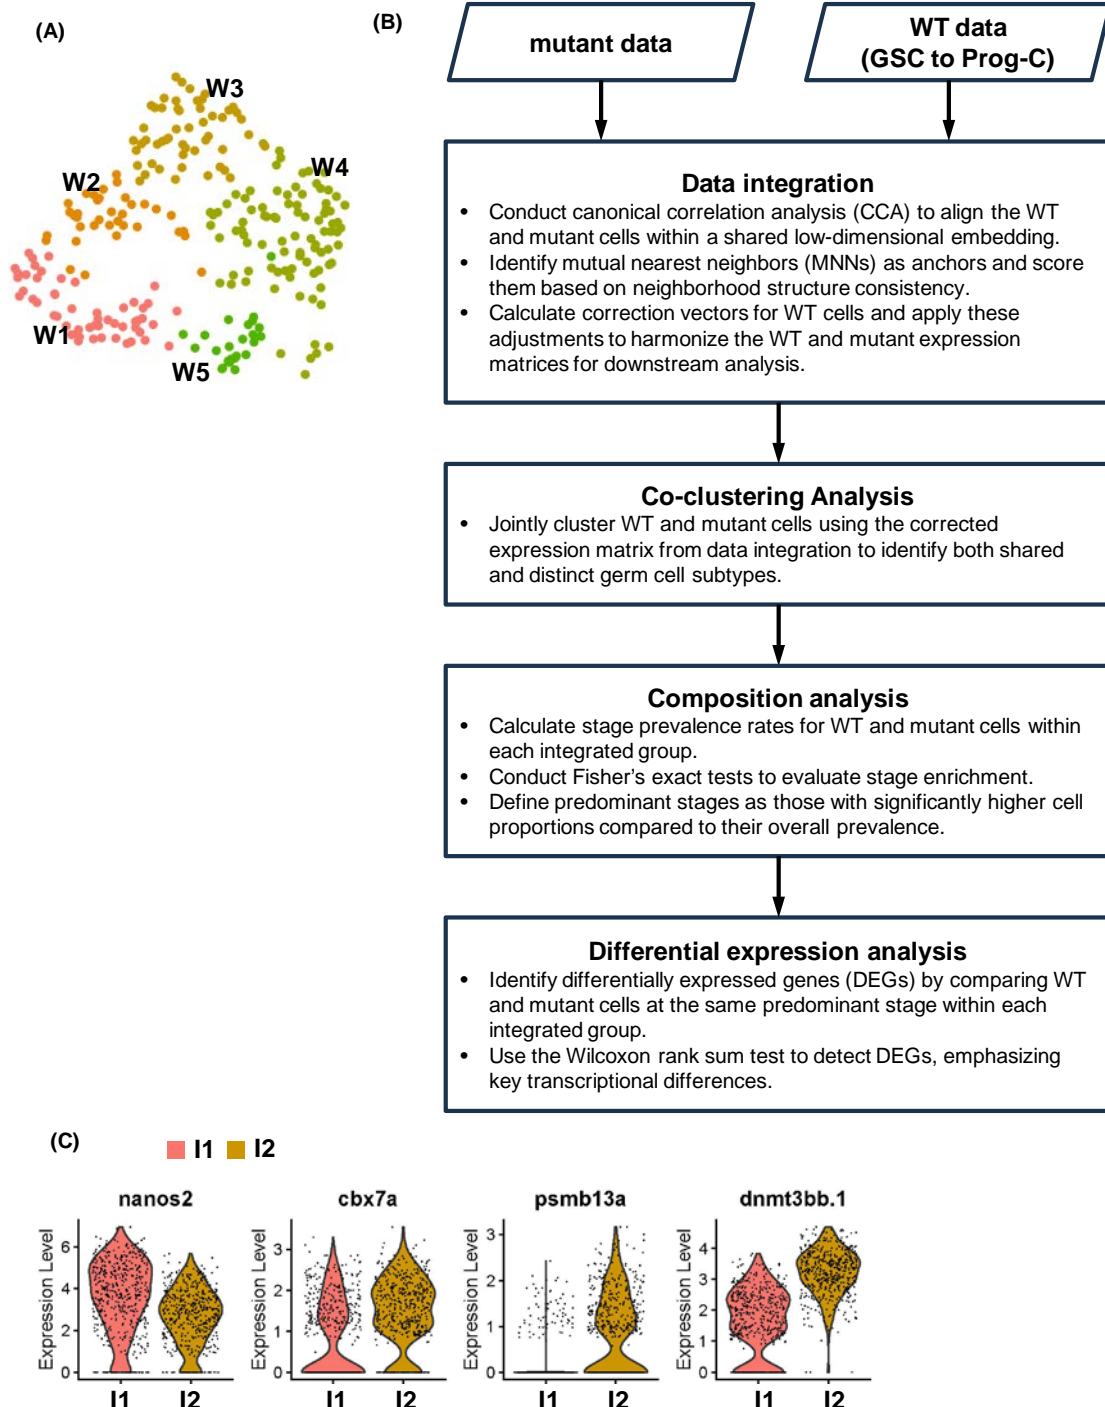

**Figure 3—Figure Supplement 2. Transcriptome analysis of integrated groups.**

**(A)** WT germ cells in cluster W1-W5 visualized by UMAP. **(B)** The flowchart of the co-clustering analysis. **(C)** Split-violin plots showing the distribution of cells expressing four top GSC markers in integrated groups I1 and I2.
