# Supplementary material for: Single-cell transcriptomes of zebrafish germline reveal progenitor types and feminization by Foxl2l
Source: eLife journal article supplement (doi:10.7554/elife.100204), 2025-06-11
Supplement: supp [file elife-100204-supp-v1.zip]

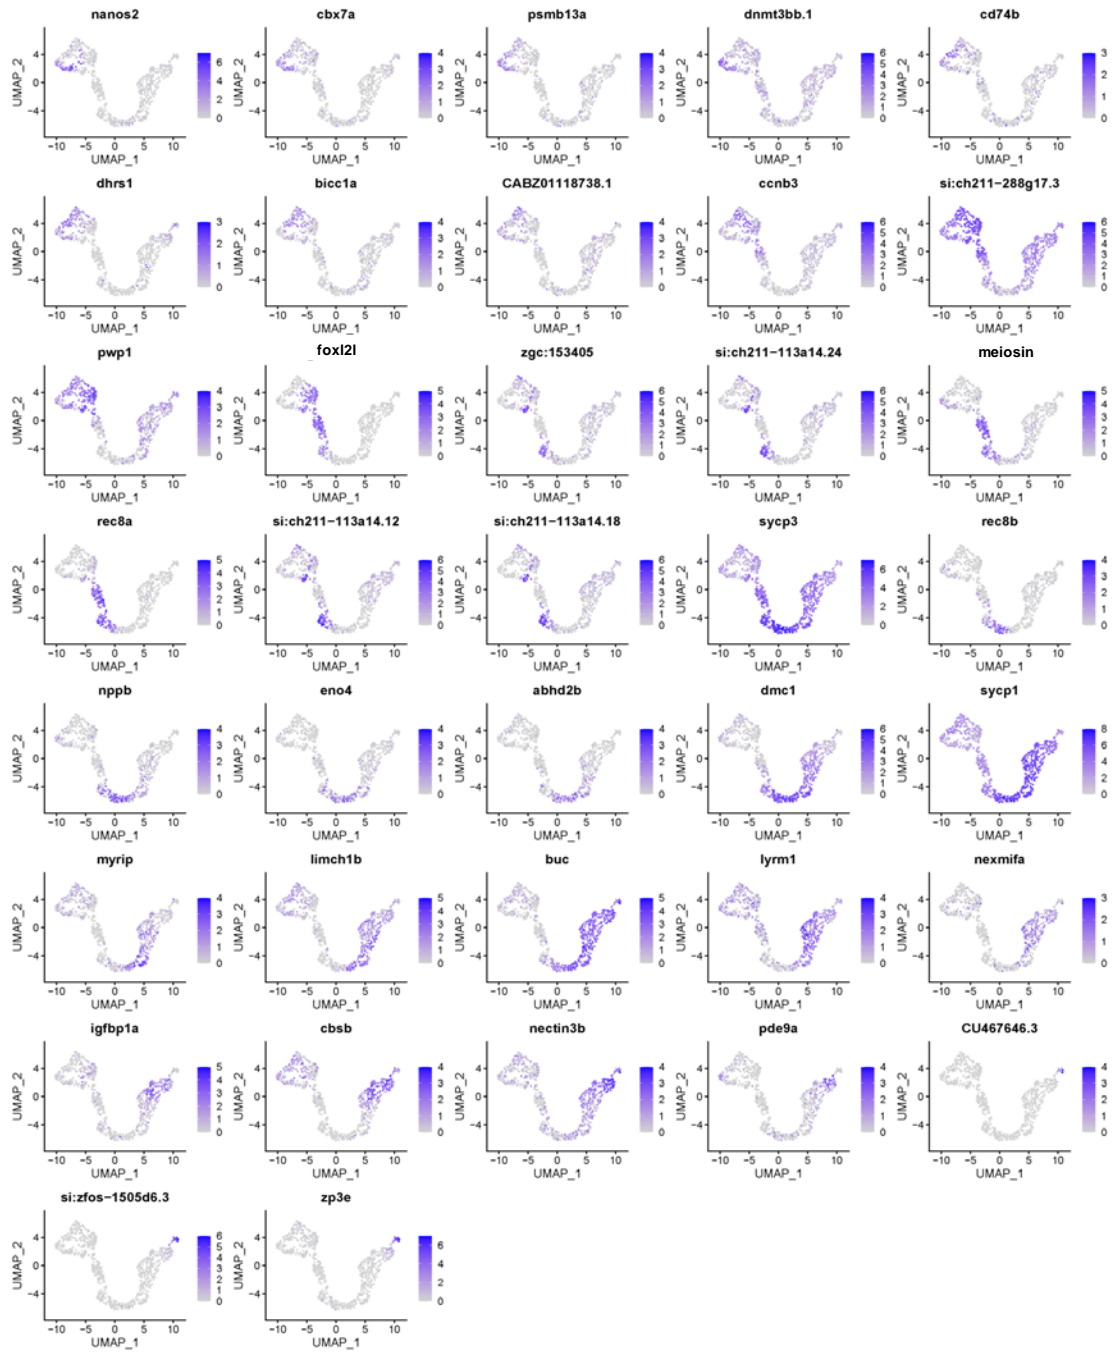

**Figure 1—Figure Supplement 3. Expression profiles of top and known marker genes in WT germ cell at 26 dpf.**

Expression of representative WT marker genes shown by Uniform Manifold Approximation and Projection (UMAP). The scales of expression levels are shown at the right of each UMAP.
