# Supplementary material for: Single-cell transcriptomes of zebrafish germline reveal progenitor types and feminization by Foxl2l
Source: eLife journal article supplement (doi:10.7554/elife.100204), 2025-06-11
Supplement: supp [file elife-100204-supp-v1.zip]

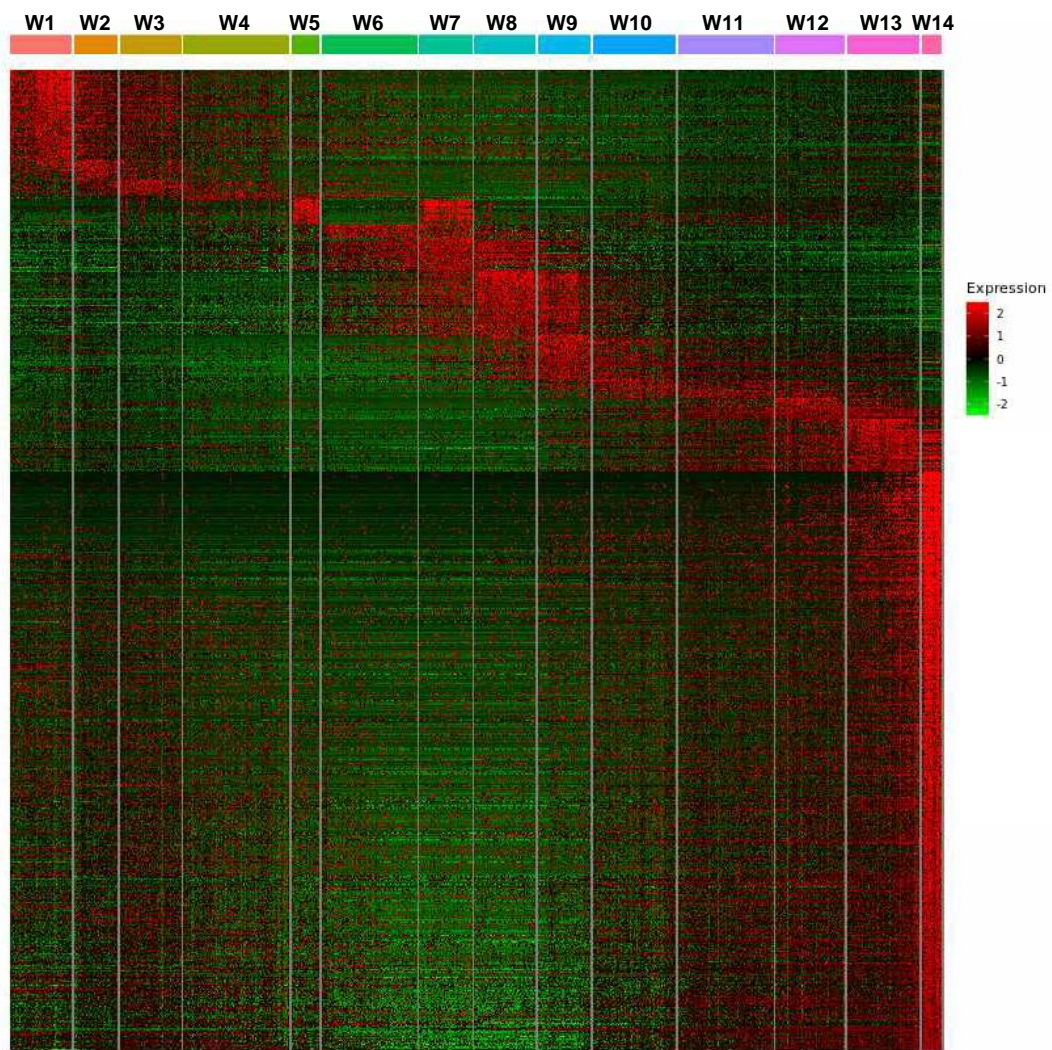

**Figure 1—Figure Supplement 2. Analysis of WT clusters.**

Expression of marker genes (Y-axis) in each WT cluster (X-axis) in a heatmap. Genes that reach the criteria (fraction  $\geq 0.8$ , specificity  $\geq 0.2$ ,  $q$ -value  $\leq 0.01$ ) are defined as marker genes. Expression value is visualized with range between -2 to 2.
