# Supplementary material for: Single-cell transcriptomes of zebrafish germline reveal progenitor types and feminization by Foxl2l
Source: eLife journal article supplement (doi:10.7554/elife.100204), 2025-06-11
Supplement: supp [file elife-100204-supp-v1.zip]

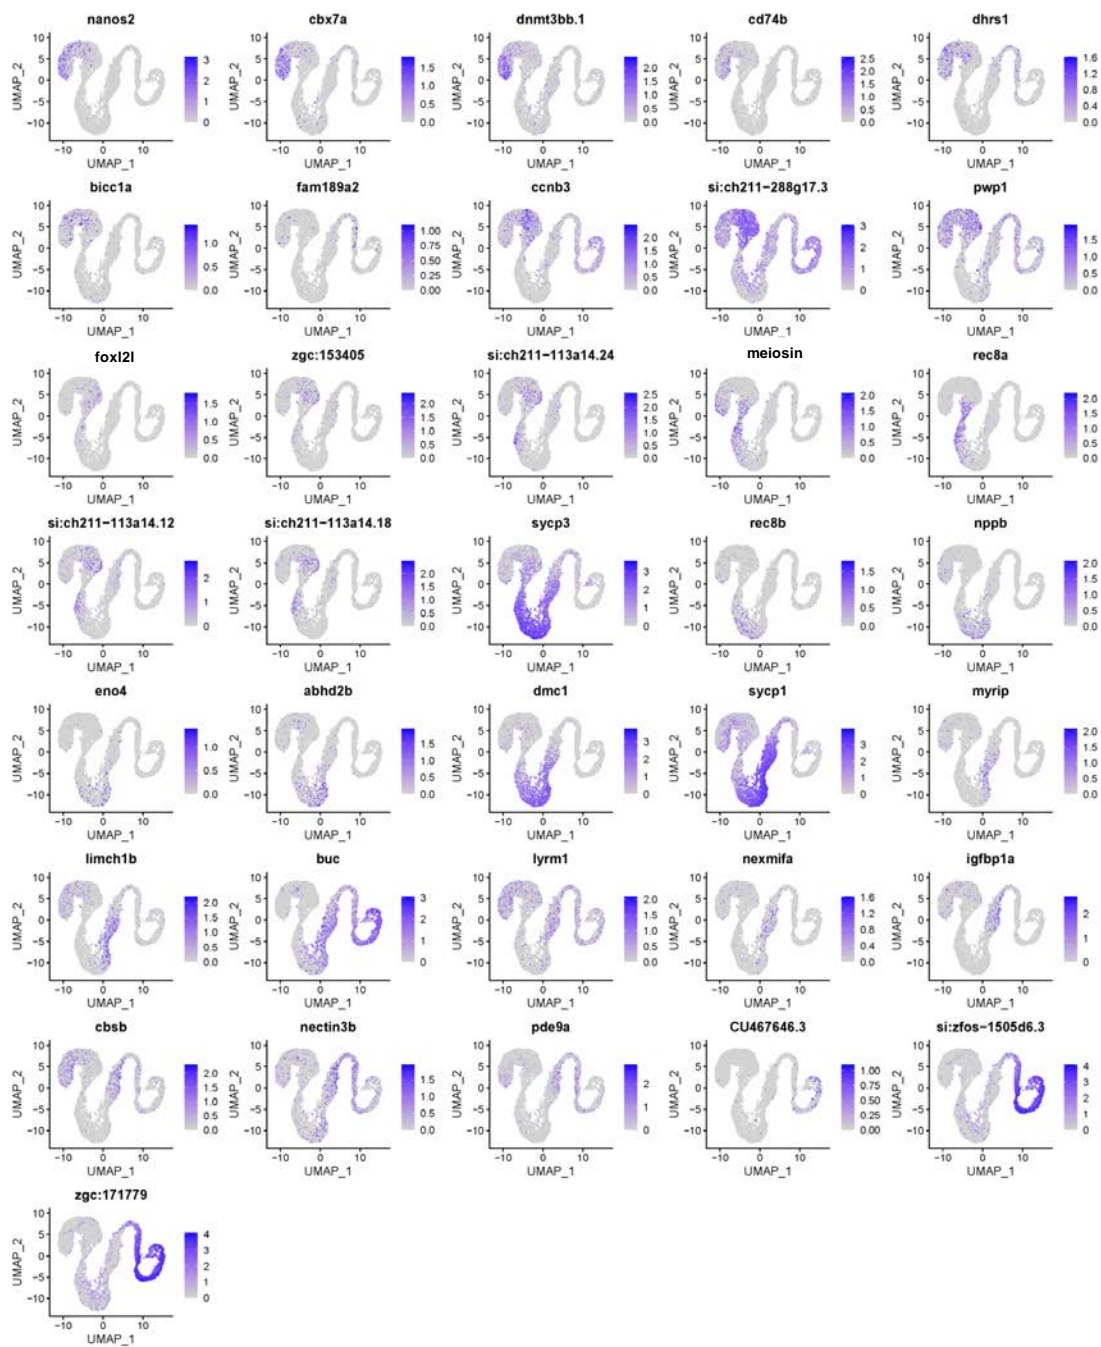

**Figure 1—Figure Supplement 4. Expression profiles of top and known WT markers extracted from the database.**

Expression of representative WT marker genes in 40-dpf germ cell obtained from Y Liu, et al. (Liu et al., 2022) shown by UMAP. The representative WT markers were selected from our 26-dpf scRNAseq analysis. The scales of expression levels are shown at the right of each UMAP.
