# Supplementary material for: Single-cell transcriptomes of zebrafish germline reveal progenitor types and feminization by Foxl2l
Source: eLife journal article supplement (doi:10.7554/elife.100204), 2025-06-11
Supplement: supp [file elife-100204-supp-v1.zip]

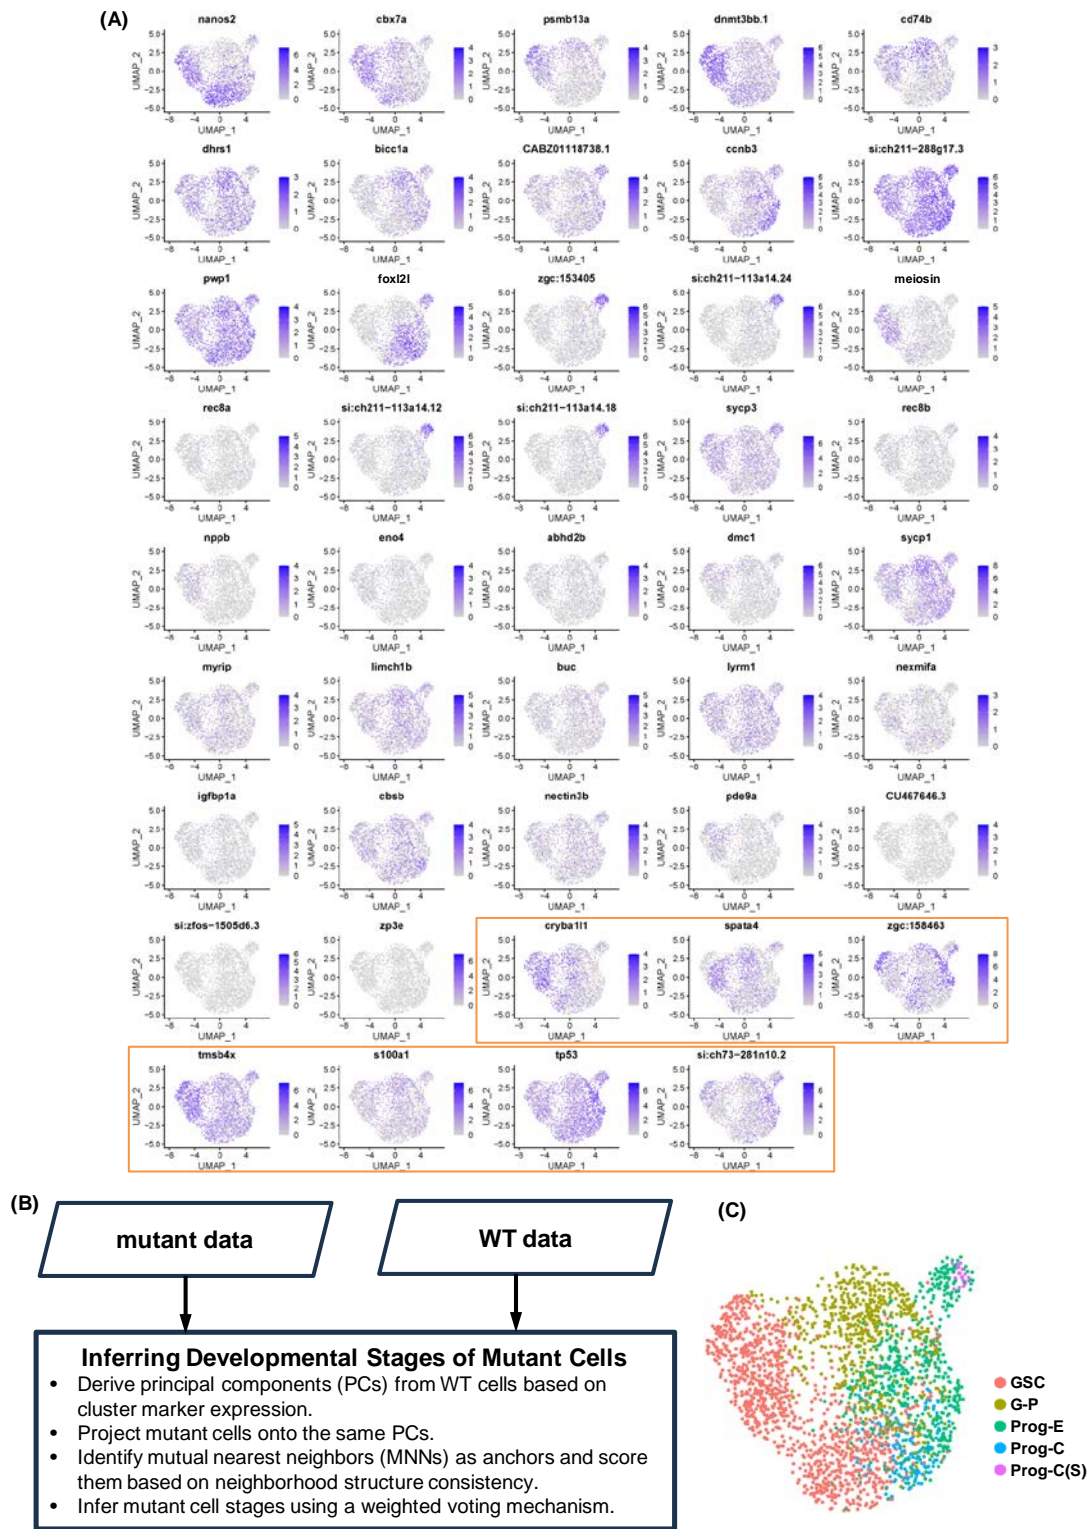

**Figure 3—Figure Supplement 1. Transcriptome analysis of mutant germ cells**

**(A)** Expression of 27 WT top marker genes and mutant top marker genes (in orange box) in mutant cells shown by UMAP. The scales of the scores are shown at the right. **(B)** the flowchart of the Inferring developmental stages of mutant cells **(C)** Mutant cells shown in UMAP. Color of each mutant cell represents annotated developmental stage.
