# Supplementary material for: Single-cell transcriptomes of zebrafish germline reveal progenitor types and feminization by Foxl2l
Source: eLife. 2025 Jun 11;14:e100204. doi: 10.7554/eLife.100204 (PMC12289312; doi:10.7554/eLife.100204)
Supplement: Supplementary file 1. [file elife-100204-supp1.xlsx]

## Sheet: Sheet1
GeneSym	specificity.WT_1	marker_test_q_value.WT_1	mean_expression.WT_1	fraction_expressing.WT_1	specificity.WT_2	marker_test_q_value.WT_2	mean_expression.WT_2	fraction_expressing.WT_2	specificity.WT_3	marker_test_q_value.WT_3	mean_expression.WT_3	fraction_expressing.WT_3	specificity.WT_4	marker_test_q_value.WT_4	mean_expression.WT_4	fraction_expressing.WT_4	specificity.WT_5	marker_test_q_value.WT_5	mean_expression.WT_5	fraction_expressing.WT_5	specificity.WT_6	marker_test_q_value.WT_6	mean_expression.WT_6	fraction_expressing.WT_6	specificity.WT_7	marker_test_q_value.WT_7	mean_expression.WT_7	fraction_expressing.WT_7	specificity.WT_8	marker_test_q_value.WT_8	mean_expression.WT_8	fraction_expressing.WT_8	specificity.WT_9	marker_test_q_value.WT_9	mean_expression.WT_9	fraction_expressing.WT_9	specificity.WT_10	marker_test_q_value.WT_10	mean_expression.WT_10	fraction_expressing.WT_10	specificity.WT_11	marker_test_q_value.WT_11	mean_expression.WT_11	fraction_expressing.WT_11	specificity.WT_12	marker_test_q_value.WT_12	mean_expression.WT_12	fraction_expressing.WT_12	specificity.WT_13
nanos2	0.60384	1.56161e-46	13.5115	0.943396	0.114883	1	1.61271	0.189189	0.0541015	1	0.618957	0.269231	0.102906	1	1.39907	0.155556	0.0323296	1	0.327506	0.0416667	0	9.31338e-05	0	0	0	1	0	0	0.0158996	1	0.138995	0.0769231	0.0547662	1	0.62848	0.333333	0.0167495	1	0.147913	0.140845	0.0175353	1	0.15625	0.209877	0.0122402	1	0.101862	0.20339	0.0115717
cbx7a	0.380571	7.22507e-31	1.83795	0.90566	0.201699	0.285767	0.797297	0.621622	0.099477	1	0.316907	0.403846	0.104028	1	0.335684	0.255556	0.0242395	1	0.0545843	0.0416667	0.0574191	1	0.157774	0.0987654	0.0424615	1	0.108362	0.0444444	0.0495962	1	0.131397	0.0769231	0.0651683	1	0.184983	0.133333	0.0371722	1	0.0919621	0.084507	0.0152133	0.531156	0.0312019	0.0493827	0.0107405	1	0.0206528	0.0508475	0.0495714
psmb13a	0.379323	2.07601e-26	1.86891	0.830189	0.197708	0.0412996	0.792943	0.648649	0.123177	1	0.426498	0.5	0.0427618	1	0.111623	0.0777778	0.0451459	1	0.119382	0.0833333	0.0179943	0.046833	0.0389382	0.0246914	0.0616993	1	0.176327	0.0888889	0.0908435	1	0.288035	0.153846	0.0218812	1	0.0492558	0.0444444	0.0499129	1	0.135244	0.126761	0.0604273	1	0.171771	0.246914	0.0269953	1	0.0635136	0.135593	0.030622
dnmt3bb.1	0.368096	2.98099e-41	6.98292	0.981132	0.117425	1	1.55688	0.891892	0.0880963	1	1.07562	0.846154	0.0850347	1	1.02812	0.6	0.0690381	1	0.789065	0.458333	0.077989	1	0.92089	0.407407	0.0724155	1	0.838211	0.311111	0.0568777	1	0.618366	0.25	0.0529959	1	0.566045	0.355556	0.0518063	1	0.550231	0.422535	0.0643128	1	0.721548	0.617284	0.0672173	1	0.762874	0.677966	0.0777116
zgc:195173	0.359235	1.46458e-38	3.52351	0.981132	0.140816	1	1.02685	0.783784	0.160376	1.64555e-06	1.21746	0.884615	0.077238	1	0.473702	0.322222	0.0411786	1	0.215481	0.125	0.0805715	1	0.499849	0.246914	0.052228	1	0.289451	0.111111	0.102743	1	0.682313	0.346154	0.0314955	1	0.155014	0.111111	0.0235161	0.0446219	0.108681	0.0985915	0.0216747	0.0386048	0.0984923	0.135802	0.025069	1	0.117426	0.186441	0.0460868
id4	0.358696	1.11459e-25	2.51278	0.90566	0.121402	1	0.604882	0.540541	0.111174	1	0.539736	0.5	0.0948808	1	0.440126	0.288889	0.0401612	1	0.149286	0.125	0.124162	1	0.622797	0.283951	0.0988821	1	0.464097	0.155556	0.154742	1	0.830064	0.307692	0.0488247	1	0.190167	0.155556	0.0214251	1	0.0694008	0.084507	0.0098672	0.000461991	0.0275821	0.0246914	0.0108526	1	0.030855	0.0847458	0.0183462
isg15	0.349766	3.55826e-31	21.3037	0.981132	0.228993	3.13691e-11	12.1922	1	0.229262	2.5446e-18	12.2111	1	0.085301	1	3.36479	0.677778	0.0481967	1	1.63932	0.583333	0.0665793	1	2.45703	0.567901	0.05864	1	2.09431	0.444444	0.0248219	1	0.726273	0.326923	0.00892824	0.0252393	0.214848	0.133333	0.00499302	1.07726e-09	0.109191	0.084507	0.0116115	0.00039212	0.292755	0.271605	0.00623992	0.000904654	0.141398	0.220339	0.0143663
ctss2.2	0.340789	3.47074e-22	2.50265	0.886792	0.153671	0.34638	0.875656	0.783784	0.144175	1	0.805523	0.653846	0.103555	1	0.524301	0.333333	0.0901955	1	0.439112	0.25	0.0716123	1	0.327383	0.148148	0.0939733	1	0.462806	0.2	0.0610643	1	0.267782	0.134615	0.0660937	1	0.295836	0.222222	0.0396678	1	0.15652	0.126761	0.0270119	1	0.0977908	0.148148	0.0222569	1	0.0773543	0.152542	0.0348542
cxxc5a	0.339938	1.90123e-21	1.51008	0.811321	0.15747	1	0.547333	0.621622	0.0675665	1	0.184139	0.192308	0.144398	1	0.488619	0.333333	0.21987	1	0.849919	0.416667	0.00584933	0.0018418	0.0096494	0.0123457	0.0306042	1	0.0689218	0.0444444	0.0157988	1	0.0310419	0.0192308	0	0.544447	0	0	0.0226382	1	0.0477973	0.028169	0.0467078	1	0.115984	0.135802	0.0500738	1	0.126469	0.186441	0.0596094
arrdc3a	0.336774	1.80375e-29	4.14631	0.924528	0.245349	3.52188e-12	2.73135	0.945946	0.157655	6.5971e-06	1.52365	0.846154	0.0605494	1	0.4458	0.344444	0.0467832	1	0.32302	0.208333	0.0286642	0.00287928	0.176865	0.0987654	0.0576655	1	0.419321	0.155556	0.0463752	1	0.319526	0.153846	0.0585965	1	0.427827	0.244444	0.0198597	0.0116366	0.113466	0.112676	0.0307828	1	0.192932	0.246914	0.0498461	1	0.349528	0.440678	0.0506759
jag2b	0.329493	1.00926e-31	2.92145	0.943396	0.242466	4.88363e-13	1.94951	0.945946	0.15093	0.0011369	1.04332	0.788462	0.0663072	1	0.362361	0.288889	0.0452192	1	0.224516	0.125	0.0134183	7.37672e-07	0.0515068	0.037037	0.0245537	0.730131	0.106258	0.0444444	0.0170924	0.0229928	0.0687194	0.0384615	0.0165235	1	0.0659947	0.0666667	0.0208631	0.003607	0.0872884	0.0704225	0.0375619	1	0.178528	0.259259	0.0431969	1	0.212143	0.305085	0.098704
rab11bb	0.324461	9.41048e-28	3.47835	0.943396	0.152978	0.0109308	1.29005	0.864865	0.176124	1.97617e-06	1.55233	0.846154	0.104397	1	0.785165	0.466667	0.0939982	1	0.686112	0.375	0.105982	1	0.800564	0.333333	0.0567226	1	0.361781	0.155556	0.064436	1	0.424617	0.211538	0.025112	1	0.132652	0.0888889	0.0202146	0.00626606	0.10209	0.0985915	0.0173082	0.000937426	0.0847469	0.123457	0.0134369	0.0513899	0.0626767	0.118644	0.0333564
dkk3b	0.321394	1.10281e-22	1.41423	0.867925	0.199091	0.010309	0.751193	0.702703	0.156189	1	0.545741	0.576923	0.080121	1	0.230325	0.2	0.0419204	1	0.102233	0.0833333	0.0826353	1	0.239568	0.123457	0.046006	1	0.114715	0.0222222	0.0424765	1	0.103913	0.0576923	0.0402467	1	0.0972156	0.0888889	0.0343788	1	0.0800831	0.0704225	0.032349	1	0.0743307	0.111111	0.0571562	1	0.150363	0.271186	0.0328361
shroom4	0.319929	5.79679e-28	2.34813	0.962264	0.175357	0.0721179	1.06132	0.783784	0.113444	1	0.601052	0.692308	0.155971	0.296043	0.909905	0.544444	0.103236	1	0.532185	0.333333	0.0775678	1	0.3692	0.197531	1.11022e-16	0.000107043	0	0	0.0173969	0.0240152	0.0586322	0.0384615	0.00999678	0.0159085	0.0303861	0.0222222	0.0277817	0.0126251	0.103119	0.0704225	0.0184025	0.00202832	0.0627142	0.0987654	0.0411352	1	0.16682	0.271186	0.0878208
si:dkey-188i13.9	0.319497	7.5825e-21	2.56417	0.867925	0.256842	7.49897e-09	1.92271	0.891892	0.117342	1	0.686901	0.711538	0.0751294	1	0.387832	0.288889	0.0877175	1	0.472394	0.208333	0.0808425	1	0.42569	0.197531	0.0637155	1	0.314918	0.133333	0.0387402	1	0.169473	0.0961538	0.0234688	1	0.0919379	0.0666667	0.05109	1	0.238804	0.183099	0.0444505	1	0.200859	0.259259	0.0334685	1	0.141597	0.220339	0.0192679
slc25a55b	0.316896	5.6209e-20	1.21542	0.811321	0.174261	1	0.551684	0.594595	0.205896	1.68591e-05	0.687505	0.653846	0.124293	1	0.354607	0.322222	0.134467	1	0.392828	0.25	0.0472358	1	0.103772	0.0493827	0.0505458	1	0.112896	0.0444444	0.0175701	1	0.0310967	0.0192308	0	0.462823	0	0	0	0.000289142	0	0	0	1.59006e-05	0	0	0.0245546	1	0.0465257	0.118644	0.0556441
waslb	0.316289	1.29996e-31	6.25652	0.981132	0.198912	8.09318e-10	3.38977	1	0.15936	2.97222e-08	2.53145	0.961538	0.144441	1.10913e-07	2.22568	0.822222	0.0701859	1	0.879705	0.416667	0.0836219	1	1.09884	0.444444	0.0269147	0.191013	0.268369	0.111111	0.0147328	0.000142834	0.130052	0.0769231	0.0238469	1	0.231752	0.155556	0.0154339	4.74676e-06	0.137458	0.126761	0.00758943	3.08084e-11	0.0595005	0.0864198	0.0377583	1	0.405981	0.271186	0.048472
tnfaip6	0.301965	3.76397e-18	2.30871	0.867925	0.111771	1	0.625452	0.702703	0.077565	1	0.391621	0.442308	0.0416923	0.0167341	0.179925	0.122222	0.0382255	1	0.16165	0.0833333	0.0513292	0.578865	0.232917	0.123457	0.0612954	1	0.290853	0.133333	0.103879	1	0.569062	0.25	0.140122	1	0.838943	0.533333	0.0875504	1	0.456959	0.352113	0.0627597	1	0.299617	0.407407	0.075395	1	0.377763	0.525424	0.0791375
tprg1	0.298849	1.30672e-30	2.59225	0.962264	0.169052	0.0386473	1.2212	0.756757	0.13578	0.0386519	0.916508	0.75	0.0379377	1	0.182295	0.177778	0	1	0	0	0.00829003	2.12039e-08	0.0294512	0.0246914	0.0314557	1	0.144867	0.0666667	0.0645028	1	0.353009	0.134615	0.0548745	1	0.288179	0.2	0.0217514	0.0781086	0.0925809	0.0985915	0.0336524	1	0.157341	0.209877	0.0608105	1	0.327777	0.440678	0.114942
sp100.2	0.297975	9.04713e-31	4.50105	0.962264	0.165626	0.000157376	2.07211	0.945946	0.157576	0.000392082	1.94091	0.865385	0.0698082	1	0.679864	0.444444	0.0913717	1	0.95755	0.583333	0.0495512	1	0.44226	0.234568	0.0482715	1	0.428092	0.222222	0.0764203	1	0.762461	0.288462	0.0751657	1	0.74661	0.422222	0.0492463	1	0.438875	0.309859	0.0427004	1	0.367684	0.395062	0.0472291	1	0.416632	0.508475	0.0449817
smtnb	0.297608	7.32434e-24	2.10312	0.962264	0.195472	0.0015294	1.20633	0.837838	0.139537	1	0.774763	0.634615	0.13545	1	0.745299	0.488889	0.0991242	1	0.497494	0.25	0.161292	1	0.93657	0.382716	0.0403423	1	0.160415	0.0888889	0.0138926	0.00794972	0.0441668	0.0192308	0.0185262	1	0.0622714	0.0444444	0.0174253	0.0037673	0.0578652	0.056338	0.0202655	0.0512916	0.0693563	0.111111	0.0467234	1	0.192398	0.220339	0.0311657
fabp7a	0.292753	1.83327e-34	9.3186	1	0.10965	1	2.5654	0.972973	0.203858	5.97271e-14	5.77389	0.980769	0.141116	3.8828e-06	3.55999	0.877778	0.0640559	1	1.29256	0.583333	0.0786158	1	1.67495	0.530864	0.0315028	0.0381792	0.53608	0.222222	0.0149268	8.65387e-10	0.217815	0.0961538	0.0184811	2.33154e-05	0.281137	0.155556	0.0180295	2.42638e-09	0.272925	0.211268	0.0247207	0.0442217	0.399155	0.481481	0.0528812	1	1.01637	0.711864	0.0809293
arl6ip5b	0.292591	1.62965e-22	3.4291	0.90566	0.189367	9.16072e-07	1.92896	0.945946	0.137331	0.100823	1.26527	0.807692	0.0862273	1	0.69388	0.388889	0.0440088	1	0.297855	0.208333	0.108822	1	0.935514	0.358025	0.0718318	1	0.55008	0.244444	0.0792115	1	0.622755	0.326923	0.0950747	1	0.786275	0.466667	0.0362547	1	0.234504	0.225352	0.017159	2.48115e-05	0.0947247	0.111111	0.00876432	0.000425332	0.0427593	0.101695	0.0229343
crip1	0.287933	1.70701e-29	4.22557	0.943396	0.161535	1.58275e-05	1.96945	0.945946	0.13694	3.55171e-07	1.58661	0.961538	0.072672	1	0.702617	0.455556	0.0584075	1	0.533473	0.291667	0.0177045	1.14635e-08	0.123773	0.0740741	0	3.49631e-08	0	0	0	3.52147e-10	0	0	0.0205388	0.201962	0.147921	0.111111	0.0277603	0.0990384	0.212967	0.183099	0.0335776	1	0.268639	0.308642	0.0702134	1	0.672667	0.694915	0.115255
irf10	0.286657	2.67678e-32	4.59095	0.981132	0.187365	1.8626e-07	2.61633	0.972973	0.1544	7.90052e-06	2.02849	0.903846	0.0731247	1	0.773921	0.511111	0.0728484	1	0.770218	0.458333	0.0434155	0.0853027	0.402868	0.222222	0.0444247	1	0.4145	0.177778	0.0112031	1.48609e-08	0.0785117	0.0384615	0.00746586	5.93827e-07	0.0487531	0.0444444	0.0203602	9.4468e-06	0.159966	0.169014	0.0522518	1	0.507185	0.518519	0.0641681	1	0.656166	0.728814	0.0934997
psma6l	0.286536	6.14229e-25	4.00741	0.962264	0.241124	8.86535e-13	3.18978	0.972973	0.227484	1.46514e-15	2.95312	0.942308	0.0765186	1	0.715965	0.433333	0.0418817	1	0.336545	0.208333	0.0662978	1	0.59716	0.283951	0.0456391	1	0.374327	0.133333	0.0293504	1	0.217535	0.134615	0.0443363	1	0.361124	0.177778	0.0295273	1	0.219134	0.211268	0.0288779	1	0.213275	0.259259	0.0481824	1	0.40041	0.474576	0.0375676
eno1b	0.283933	4.23343e-22	3.16981	0.924528	0.146571	1	1.32491	0.864865	0.139214	0.0284719	1.2387	0.884615	0.122284	1	1.04634	0.622222	0.0947947	1	0.753346	0.416667	0.145765	1	1.31539	0.481481	0.0524772	1	0.356536	0.133333	0.028891	0.00427144	0.170836	0.0961538	0.0310667	0.799391	0.186656	0.133333	0.0313484	0.00242765	0.188726	0.15493	0.0362339	1	0.225376	0.320988	0.0405523	1	0.258903	0.389831	0.0599084
plcg1	0.27941	3.6643e-19	2.15464	0.90566	0.111804	1	0.646888	0.594595	0.109282	1	0.628095	0.576923	0.141273	1	0.876675	0.522222	0.13998	1	0.866215	0.5	0.0647697	1	0.32231	0.135802	0.035297	0.856374	0.151525	0.0666667	0.0181955	0.000900244	0.0678532	0.0384615	0.0185013	0.021985	0.0692226	0.0444444	0.0332035	0.113523	0.140581	0.126761	0.0525158	1	0.247772	0.382716	0.0823314	1	0.436805	0.40678	0.0972949
irf2	0.278893	3.16121e-25	2.41676	0.962264	0.159184	0.526217	1.15245	0.837838	0.153438	0.0279805	1.09822	0.807692	0.0723228	1	0.416587	0.344444	0.0147579	1	0.0594133	0.0416667	0.112606	1	0.734107	0.345679	0.0814796	1	0.48468	0.222222	0.0731963	1	0.422971	0.173077	0.0367906	1	0.179274	0.133333	0.0494731	1	0.258619	0.183099	0.0676624	1	0.382937	0.419753	0.0468739	1	0.241833	0.338983	0.0710967
rdh12l	0.276331	1.98329e-22	2.03448	0.90566	0.183918	0.00129993	1.18754	0.810811	0.12882	1	0.744805	0.673077	0.038029	1	0.15912	0.166667	0.0459701	1	0.201155	0.125	0.0535462	1	0.243235	0.123457	0.0381152	1	0.159564	0.0888889	0.0813321	1	0.412066	0.211538	0.0738531	1	0.364537	0.133333	0.0246539	1	0.0937376	0.112676	0.0142903	0.00250765	0.0487261	0.0987654	0.0421299	1	0.180552	0.271186	0.118553
si:dkey-286j15.3	0.275302	8.03421e-28	4.35535	0.962264	0.21871	1.12058e-13	3.21195	1	0.179952	4.865e-13	2.48246	0.961538	0.0802458	1	0.871456	0.544444	0.0273654	1	0.22888	0.166667	0.0497283	1	0.477165	0.246914	0.0305108	1	0.261316	0.111111	0.00852041	1.49049e-05	0.0569407	0.0384615	0.0556255	1	0.548812	0.311111	0.0338143	1	0.296327	0.28169	0.0292112	1	0.247805	0.308642	0.0218097	1	0.173899	0.271186	0.0253428
xaf1	0.268817	3.70644e-23	5.56959	0.962264	0.24552	4.79591e-16	4.94002	1	0.227796	3.19198e-19	4.4735	0.980769	0.110766	1	1.7387	0.622222	0.0421718	1	0.51325	0.291667	0.042279	1	0.514864	0.234568	0.0314096	1	0.357312	0.155556	0.0594077	1	0.786519	0.346154	0.0482931	1	0.607189	0.377778	0.0192633	0.000672377	0.197655	0.169014	0.0140031	5.45231e-06	0.135043	0.185185	0.0253523	1	0.275301	0.355932	0.0291544
msna	0.267783	1.77658e-20	8.03008	0.981132	0.178722	0.00027797	4.70489	0.972973	0.094934	1	2.06587	0.884615	0.0802716	1	1.66731	0.655556	0.116527	1	2.69038	0.708333	0.0522557	0.00189432	0.970738	0.345679	0.086009	1	1.82068	0.422222	0.0433088	0.0115837	0.768663	0.288462	0.0419274	1	0.738447	0.4	0.0681224	1	1.35414	0.56338	0.100953	1	2.23563	0.91358	0.0784137	1	1.61838	0.847458	0.0564336
fthl31	0.266926	2.45303e-16	4.77008	0.924528	0.131673	1	1.88092	0.918919	0.20731	9.27737e-13	3.41395	0.980769	0.105771	1	1.41617	0.555556	0.0450691	1	0.481745	0.333333	0.121593	1	1.69596	0.567901	0.120335	1	1.67324	0.466667	0.0675385	1	0.799075	0.326923	0.0389257	1	0.401924	0.222222	0.0345758	0.109183	0.347431	0.253521	0.0272888	0.0806979	0.260235	0.333333	0.0235655	1	0.21784	0.372881	0.0291397
ifi35	0.266309	1.0303e-22	4.94221	0.962264	0.173162	0.00030796	2.79802	0.945946	0.141467	0.000549726	2.1465	0.961538	0.0507283	1	0.57997	0.4	0.053445	1	0.618979	0.333333	0.0486896	0.0238969	0.551092	0.271605	0.103668	1	1.43418	0.377778	0.118908	1	1.71225	0.557692	0.11567	1	1.65211	0.6	0.0879039	1	1.16063	0.633803	0.0610178	1	0.730764	0.691358	0.0442761	1	0.489766	0.661017	0.0212687
anxa1a	0.264959	6.79894e-19	1.88844	0.886792	0.21382	6.51866e-07	1.42181	0.891892	0.139683	0.661189	0.812147	0.673077	0.0661774	1	0.311356	0.266667	0.0880382	1	0.447345	0.291667	0.0844943	1	0.424481	0.197531	0.0533496	1	0.237579	0.111111	0.128746	1	0.730289	0.269231	0.0636666	1	0.296545	0.2	0.0285892	1	0.110101	0.0985915	0.0128251	0.00295811	0.0420497	0.0740741	0.0274823	1	0.104936	0.101695	0.0319103
spock3	0.262302	1.71606e-17	1.85495	0.867925	0.201066	4.34456e-05	1.30481	0.810811	0.127741	1	0.71959	0.653846	0.1725	0.00617192	1.06605	0.533333	0.211588	1	1.39583	0.458333	0.0897568	1	0.456453	0.246914	0.0189835	1	0.0668162	0.0444444	0.0249689	1	0.0929799	0.0576923	0.0332083	1	0.131593	0.111111	0.0119387	0.0100237	0.0384553	0.056338	0.0160499	0.035603	0.0546558	0.0864198	0.00253618	0.000412011	0.00637656	0.0169492	0.0274937
tada2b	0.261569	2.31246e-17	3.58409	0.90566	0.133614	1	1.47961	0.864865	0.158663	0.00108572	1.85234	0.923077	0.162354	9.03548e-06	1.9091	0.788889	0.125013	1	1.35693	0.708333	0.0681987	1	0.624342	0.308642	0.0303334	0.000137599	0.228462	0.0888889	0.0460899	0.0142269	0.382283	0.153846	0.0473802	1	0.395619	0.244444	0.0618535	1	0.552048	0.408451	0.0589709	1	0.519929	0.530864	0.0604644	1	0.536512	0.576271	0.0537336
cst3	0.260975	1.56529e-17	1.97426	0.867925	0.219838	7.07489e-10	1.57324	0.945946	0.254498	1.58985e-20	1.90968	0.942308	0.119944	1	0.710488	0.411111	0.0725079	1	0.372741	0.25	0.0378862	1	0.165765	0.111111	0.046674	1	0.214538	0.111111	0.0179833	0.578307	0.0670939	0.0384615	0.0171466	1	0.0633746	0.0444444	0.015959	0.00518345	0.0581668	0.0422535	0.00917354	0.000134689	0.0302074	0.0493827	0.00283193	0.000381097	0.00774924	0.0169492	0.0294508
znf609b	0.259918	4.3281e-37	6.16708	1	0.158309	0.00316943	3.20471	0.972973	0.140168	0.000187844	2.73283	1	0.142074	0.000739973	2.78147	0.866667	0.113675	1	2.08147	0.75	0.0605171	0.109465	0.931952	0.407407	0.0404247	0.000133294	0.563928	0.222222	0.0335581	3.33439e-07	0.44854	0.211538	0.0468847	0.34265	0.677553	0.333333	0.0541963	1	0.811641	0.535211	0.0685948	1	1.09129	0.802469	0.0719729	1	1.15969	0.847458	0.0821721
ifi46	0.259842	1.4673e-37	11.4251	1	0.152986	0.00060481	5.67886	1	0.18407	1.01275e-13	7.24196	1	0.123685	0.000448318	4.30345	0.911111	0.0938082	1	3.01225	0.625	0.0905631	1	2.87943	0.666667	0.059599	1	1.69435	0.577778	0.0482274	1	1.30056	0.423077	0.03216	1	0.789088	0.422222	0.017679	2.31552e-09	0.382615	0.323944	0.0314676	0.255497	0.768366	0.580247	0.0217065	0.000467137	0.489599	0.440678	0.0523897
psmb10	0.259325	7.20083e-30	5.37947	1	0.214201	5.96717e-11	4.17684	0.972973	0.190849	8.9187e-14	3.58592	1	0.0736563	1	1.0448	0.611111	0.0510722	1	0.659399	0.291667	0.060693	1	0.818368	0.345679	0.0796535	1	1.15399	0.355556	0.0672085	1	0.930493	0.384615	0.0564408	1	0.747109	0.422222	0.0498231	1	0.639365	0.43662	0.0261778	0.0254382	0.289903	0.345679	0.0392984	1	0.476492	0.474576	0.0314055
phf11	0.257295	1.27915e-19	2.61724	0.924528	0.250532	4.13628e-12	2.52659	0.945946	0.217899	2.18084e-13	2.10041	0.903846	0.140115	0.724253	1.17487	0.566667	0.0957478	1	0.71769	0.333333	0.0341735	1	0.197273	0.135802	0.0299577	1	0.167935	0.0888889	0.0184916	0.195047	0.0937116	0.0576923	0.0121173	0.187218	0.0566462	0.0444444	0.0201928	0.052729	0.104157	0.0985915	0.0216139	0.0380254	0.113044	0.123457	0.0249621	1	0.134534	0.152542	0.0219381
si:dkey-28b4.7	0.255262	1.46134e-35	7.97065	1	0.180622	3.82251e-07	5.04529	0.972973	0.199066	1.90736e-19	5.73596	1	0.0973243	1	2.25554	0.744444	0.0490306	1	0.948221	0.5	0.0492979	1	0.954661	0.432099	0.0541843	1	1.0741	0.4	0.0428611	0.895694	0.802484	0.346154	0.0538946	1	1.06693	0.555556	0.02395	1.13353e-06	0.393803	0.323944	0.0236828	2.68288e-06	0.388495	0.407407	0.0884136	1	1.99443	0.864407	0.073775
lin7b	0.252976	3.56093e-13	1.54254	0.811321	0.14175	1	0.718938	0.648649	0.151009	1	0.780957	0.576923	0.025034	0.0279503	0.0813701	0.0888889	0.0310964	1	0.105934	0.0833333	0.00527222	7.75888e-08	0.012895	0.0123457	0.0994621	1	0.45424	0.155556	0.0330929	1	0.114311	0.0576923	0.0320175	1	0.109782	0.0888889	0.0407183	1	0.147508	0.140845	0.0576698	1	0.227429	0.259259	0.245657	3.01966e-11	1.48374	0.762712	0.0968901
si:ch211-93g23.2	0.252882	3.27628e-16	1.61284	0.867925	0.136457	1	0.715634	0.675676	0.129985	1	0.671739	0.557692	0.0784087	1	0.350602	0.277778	0.0979812	1	0.466106	0.208333	0.130084	1	0.672405	0.296296	0.0746633	1	0.329476	0.155556	0.141762	1	0.752158	0.346154	0.0572856	1	0.235928	0.155556	0.0483395	1	0.190863	0.084507	0.0172045	0.00306057	0.0541952	0.0740741	0.0335523	1	0.121617	0.237288	0.0689647
AL844518.1	0.252451	3.20446e-12	2.35667	0.811321	0.16002	0.00417141	1.29088	0.891892	0.160491	1.83989e-05	1.29587	0.865385	0.136772	1	1.0512	0.511111	0.096044	1	0.665328	0.333333	0.0676359	1	0.425782	0.185185	0.0705278	1	0.448917	0.155556	0.0656054	1	0.40972	0.153846	0.0534175	1	0.316578	0.222222	0.0573783	1	0.346214	0.225352	0.0309485	1	0.161349	0.209877	0.0206795	1	0.0989714	0.169492	0.0403252
scp2a	0.247624	3.46425e-24	2.35008	1	0.201814	2.49434e-06	1.79276	0.918919	0.166049	3.65967e-06	1.38631	0.903846	0.116892	1	0.876817	0.522222	0.0420836	1	0.240798	0.166667	0.0757308	1	0.502589	0.271605	0.0420834	0.136438	0.240796	0.0888889	0.050203	1	0.299735	0.173077	0.0506697	1	0.303211	0.222222	0.057748	1	0.357044	0.28169	0.0401623	1	0.227292	0.283951	0.050781	1	0.304041	0.474576	0.0598085
stmn4	0.244629	4.4534e-14	2.43927	0.90566	0.19246	2.16595e-06	1.77613	0.972973	0.131515	1	1.07785	0.807692	0.126654	1	1.02632	0.622222	0.0597872	1	0.393371	0.291667	0.0964611	1	0.72195	0.333333	0.0944058	1	0.702274	0.244444	0.0562045	1	0.364047	0.134615	0.0716005	1	0.493761	0.311111	0.0485127	1	0.302968	0.239437	0.0515237	1	0.326565	0.407407	0.0372557	1	0.218554	0.322034	0.0546787
fkbp11	0.244608	6.33548e-17	2.79583	0.962264	0.143134	0.0375481	1.3798	0.945946	0.107734	1	0.954076	0.769231	0.190034	3.06004e-08	2.00217	0.755556	0.152608	1	1.50049	0.708333	0.176197	1	1.81227	0.592593	0.0607824	1	0.460369	0.222222	0.0275113	0.000398734	0.17291	0.0576923	1.11022e-16	3.91635e-08	0	0	0.00932161	3.68859e-11	0.0474913	0.028169	0.0158935	6.92689e-08	0.0893059	0.111111	0.0261294	1	0.162417	0.271186	0.0537087
fip1l1a	0.244182	1.30838e-19	1.56324	0.924528	0.194124	5.07122e-06	1.15406	0.891892	0.0906379	1	0.428216	0.576923	0.0691677	1	0.30363	0.255556	0.0237931	1	0.0812585	0.0833333	0.0208805	6.54444e-06	0.0694125	0.037037	0.0203529	0.0549238	0.0673074	0.0222222	0.0206152	0.0485658	0.0683523	0.0384615	0.0548508	1	0.226843	0.155556	0.0334929	1	0.1232	0.112676	0.0346111	1	0.128261	0.17284	0.0886453	1	0.41621	0.542373	0.128584
l2hgdh	0.242647	5.86928e-15	1.87137	0.830189	0.0959304	1	0.555916	0.594595	0.180572	8.92124e-08	1.26628	0.846154	0.0665615	1	0.349176	0.266667	0.0259933	1	0.109184	0.0833333	0.033795	0.00389052	0.150365	0.0987654	0.0396832	1	0.183192	0.0666667	0.0450774	1	0.214467	0.115385	0.0427896	1	0.201067	0.177778	0.0595895	1	0.30379	0.267606	0.0430583	1	0.20263	0.296296	0.0628291	1	0.324689	0.457627	0.116866
rheb	0.241992	1.70754e-15	1.77015	0.886792	0.166086	0.0239104	1.07682	0.837838	0.189443	6.27806e-07	1.28056	0.846154	0.172272	6.5328e-06	1.12986	0.655556	0.141083	1	0.869577	0.375	0.0780182	1	0.405305	0.246914	0.0426069	1	0.189865	0.0888889	0.0205811	0.011155	0.0781722	0.0384615	0.0164838	0.107496	0.0599057	0.0444444	0.0101587	3.02208e-06	0.0337453	0.0422535	0.0182631	0.00105914	0.0677225	0.111111	0.0224199	1	0.0866645	0.20339	0.0395449
b2m	0.240805	4.28642e-28	20.4771	1	0.229273	3.78034e-18	19.1891	1	0.203756	8.44206e-19	16.4158	1	0.0964312	1	6.18589	0.922222	0.066032	1	3.82085	0.75	0.0647684	1	3.72892	0.802469	0.0586295	1	3.29014	0.8	0.0399902	0.300369	2.04421	0.673077	0.0426978	1	2.21655	0.666667	0.0481196	1	2.57081	0.873239	0.0659654	1	3.81599	0.962963	0.0547195	1	3.01769	0.966102	0.0367573
zfyve21	0.240701	1.42103e-14	1.72358	0.849057	0.124709	1	0.726153	0.72973	0.129973	1	0.766255	0.711538	0.0720033	1	0.358988	0.333333	0.0726876	1	0.363315	0.25	0.0448879	0.0165912	0.198606	0.0987654	0.0132384	0.00137182	0.0452496	0.0222222	0.0295806	0.225161	0.118945	0.0769231	0.0500534	1	0.227393	0.155556	0.0546257	1	0.253603	0.239437	0.0465409	1	0.207721	0.283951	0.0605436	1	0.288495	0.440678	0.131514
flna	0.240393	3.7491e-18	2.49842	0.943396	0.21925	3.14163e-10	2.21177	0.972973	0.181631	1.59436e-07	1.72484	0.903846	0.149428	1	1.33476	0.633333	0.0889649	1	0.68225	0.416667	0.0415095	0.000107678	0.26176	0.111111	0.040021	1	0.250218	0.111111	0.0173645	8.55605e-05	0.0907741	0.0576923	0.0342335	1	0.206483	0.133333	0.0342633	0.10396	0.206703	0.183099	0.0428428	1	0.272195	0.333333	0.0549566	1	0.371025	0.491525	0.0933947
raver2	0.239715	8.40948e-16	2.10381	0.90566	0.173947	0.89624	1.37717	0.783784	0.116875	1	0.819253	0.711538	0.0486745	1	0.269532	0.244444	0.0708856	1	0.431932	0.25	0.0623784	1	0.367596	0.185185	0.0900828	1	0.585929	0.266667	0.0938199	1	0.61724	0.230769	0.0793847	1	0.498657	0.288889	0.066734	1	0.40022	0.295775	0.0816954	1	0.517204	0.506173	0.0735154	1	0.452323	0.576271	0.0918553
cdca7b	0.238558	2.43389e-35	16.8633	1	0.134044	0.179417	7.89707	1	0.158169	1.81445e-05	9.80491	0.980769	0.148591	2.05565e-11	9.03442	0.977778	0.0965976	1	5.16927	0.958333	0.0892684	1	4.67219	0.925926	0.0520211	1	2.36216	0.711111	0.0240374	6.24228e-16	0.915274	0.384615	0.0287536	9.84298e-07	1.13762	0.555556	0.0443608	1	1.93771	0.830986	0.0606089	1	2.8601	0.975309	0.0539133	1	2.46992	0.949153	0.0475202
psme2	0.238	1.63609e-18	4.05534	0.962264	0.199195	1.69342e-09	3.20452	1	0.177968	2.60867e-09	2.76187	0.942308	0.0714448	1	0.848952	0.477778	0.0400122	1	0.411448	0.208333	0.0516686	1	0.565006	0.283951	0.0816856	1	1.00634	0.333333	0.113611	1	1.5369	0.519231	0.104031	1	1.3717	0.577778	0.0660704	1	0.769082	0.464789	0.0397001	1	0.407493	0.382716	0.0303177	1	0.29273	0.389831	0.0372602
slc45a4b	0.237958	9.50699e-21	2.43818	0.962264	0.188349	1.46019e-06	1.78979	0.972973	0.128729	1	1.08683	0.846154	0.0844546	1	0.631451	0.433333	0.0836337	1	0.623634	0.291667	0.0430026	3.76488e-05	0.27048	0.17284	0.0388742	0.00903886	0.238783	0.111111	0.0497363	0.363228	0.324014	0.173077	0.0888323	1	0.67355	0.444444	0.0813384	1	0.601908	0.450704	0.08249	1	0.612784	0.62963	0.0763985	1	0.555816	0.677966	0.0966272
endouc	0.237095	1.40284e-15	3.1721	0.90566	0.106994	1	1.11813	0.837838	0.1368	0.0999928	1.53791	0.884615	0.0806409	1	0.778281	0.488889	0.0789148	1	0.75715	0.416667	0.099964	1	1.02443	0.444444	0.14232	1	1.61939	0.577778	0.171245	1	2.06396	0.653846	0.098114	1	1.00013	0.555556	0.0419884	1	0.343308	0.267606	0.0246325	1.10842e-05	0.178791	0.209877	0.0352099	1	0.27637	0.423729	0.019469
rnf213b	0.236019	2.14729e-14	2.32722	0.886792	0.259472	1.30855e-13	2.63815	0.972973	0.158912	0.027292	1.38089	0.788462	0.0838654	1	0.603861	0.411111	0.0897969	1	0.658937	0.333333	0.0592852	1	0.389391	0.209877	0.0468193	1	0.289999	0.111111	0.0518238	1	0.329075	0.173077	0.0744554	1	0.51905	0.288889	0.0500753	1	0.315293	0.267606	0.0353274	1	0.204821	0.246914	0.0263673	1	0.143314	0.20339	0.0775059
wdr54	0.23518	7.72316e-13	1.2261	0.849057	0.210029	1.33922e-05	1.05566	0.837838	0.1484	1	0.66827	0.634615	0.0831993	1	0.316417	0.255556	0.0624767	1	0.220158	0.166667	0.0986369	1	0.393429	0.185185	0.0773693	1	0.288476	0.155556	0.0750581	1	0.27758	0.153846	0.0634053	1	0.224284	0.177778	0.0400278	1	0.126439	0.112676	0.0383342	1	0.119876	0.135802	0.0474348	1	0.15602	0.271186	0.0739572
pde7a	0.234046	9.96667e-30	5.50735	1	0.164061	3.81922e-06	3.44567	1	0.131749	0.0143239	2.5863	0.942308	0.105248	1	1.93339	0.811111	0.126122	1	2.44353	0.791667	0.0252497	3.66457e-13	0.325392	0.17284	0.0131804	4.15267e-10	0.149275	0.0666667	0.0169811	6.48208e-13	0.201849	0.0576923	0.0303544	0.122993	0.40706	0.288889	0.0353556	0.00653761	0.490605	0.352113	0.0670775	1	1.08846	0.740741	0.0895128	1	1.57042	0.847458	0.140077
cln3	0.233348	1.89679e-14	1.21554	0.849057	0.193764	3.13756e-07	0.950604	0.945946	0.137111	1	0.603667	0.576923	0.0668077	1	0.239963	0.222222	0.0492909	1	0.163927	0.125	0.105979	1	0.432249	0.160494	0.0361148	1	0.111585	0.0666667	0.0690989	1	0.250401	0.0961538	0.0107699	0.0662318	0.0260485	0.0222222	0.0557997	1	0.191374	0.169014	0.0381405	1	0.119333	0.197531	0.0519235	1	0.174908	0.288136	0.0782272
nfatc3a	0.232908	6.41656e-13	1.27742	0.830189	0.163351	1	0.79982	0.594595	0.115335	1	0.507986	0.615385	0.112197	1	0.49018	0.4	0.170289	1	0.844762	0.541667	0.0553723	1	0.199689	0.111111	0.0796189	1	0.315733	0.133333	0.107214	1	0.462249	0.192308	0.0431454	1	0.146392	0.111111	0.0325179	1	0.103369	0.112676	0.0373088	1	0.122356	0.185185	0.0423135	1	0.142908	0.288136	0.0609045
rad21a	0.232066	8.52246e-31	13.2067	1	0.176014	6.56446e-07	9.16591	1	0.203595	1.35624e-20	11.1068	1	0.159206	2.03698e-15	8.03305	0.988889	0.103494	1	4.5883	1	0.0601731	1	2.30228	0.62963	0.0381262	0.00137801	1.30543	0.422222	0.0332053	7.53969e-05	1.10168	0.461538	0.0309991	0.000417136	1.01283	0.466667	0.0347831	0.0801258	1.16618	0.690141	0.0431407	1	1.52056	0.901235	0.0444803	1	1.57925	0.898305	0.0524739
snapc5	0.231473	2.63924e-12	1.86812	0.886792	0.139876	1	0.962471	0.783784	0.103588	1	0.65199	0.673077	0.0806481	1	0.473199	0.377778	0.0823389	1	0.485869	0.291667	0.0609362	1	0.331983	0.197531	0.0691103	1	0.389048	0.111111	0.0804925	1	0.472037	0.192308	0.0726364	1	0.41433	0.266667	0.0796077	1	0.465445	0.366197	0.0969302	1	0.598607	0.592593	0.0921944	1	0.561362	0.711864	0.0853715
ppib	0.229614	4.16101e-31	13.0308	1	0.117812	1	5.4278	1	0.152632	3.03337e-07	7.60596	0.980769	0.152009	8.85132e-14	7.56529	1	0.0894752	1	3.80892	0.958333	0.118392	1	5.46248	0.901235	0.0441506	1	1.56578	0.466667	0.0260834	2.87951e-08	0.821362	0.307692	0.0212887	1.73079e-07	0.642508	0.311111	0.0161796	2.41055e-16	0.462336	0.323944	0.0254156	2.44564e-05	0.795927	0.641975	0.057339	1	2.1685	0.898305	0.0897601
hist2h2l	0.228953	3.09393e-26	7.51754	1	0.19645	5.48996e-07	6.13954	0.945946	0.110775	1	2.90257	0.903846	0.0493235	1	1.04051	0.555556	0.0920499	1	2.28736	0.666667	0.0402018	7.80878e-07	0.80757	0.320988	0.142413	1	4.02294	0.733333	0.0735405	1	1.71837	0.576923	0.103333	1	2.65353	0.777778	0.0615694	1	1.37317	0.661972	0.0417429	1	0.845974	0.641975	0.0483756	1	1.01569	0.745763	0.0669059
utrn	0.228816	9.93953e-12	1.25362	0.830189	0.185932	0.0242659	0.952856	0.756757	0.139708	1	0.654787	0.653846	0.0714339	1	0.276416	0.222222	0.0802789	1	0.320556	0.208333	0.0797799	1	0.318023	0.148148	0.167869	1	0.832884	0.288889	0.0861219	1	0.350589	0.173077	0.0296984	1	0.0929604	0.0666667	0.0410236	1	0.138186	0.140845	0.0477747	1	0.166896	0.222222	0.0555498	1	0.201426	0.288136	0.059601
bloc1s6	0.228641	1.26951e-13	1.38423	0.886792	0.210628	2.12709e-06	1.24179	0.864865	0.178601	6.50953e-06	0.998807	0.807692	0.0940254	1	0.433577	0.366667	0.0378763	1	0.138419	0.125	0.0688938	1	0.291849	0.148148	0	3.68113e-05	0	0	0.0291399	0.243339	0.100399	0.0576923	0.0217021	0.992002	0.070246	0.0666667	0.0432688	1	0.163139	0.15493	0.0430978	1	0.162341	0.197531	0.0582439	1	0.236243	0.355932	0.116422
sdhda	0.228197	4.4637e-20	4.3012	0.981132	0.17892	5.25242e-07	3.11891	1	0.17365	9.53671e-11	2.99851	1	0.111124	1	1.6748	0.722222	0.115649	1	1.76352	0.666667	0.109575	1	1.6447	0.567901	0.0679722	1	0.893864	0.333333	0.0621082	1	0.797801	0.307692	0.0378753	0.564269	0.431205	0.266667	0.0256754	2.42762e-07	0.268168	0.239437	0.0495954	1	0.602053	0.530864	0.0653396	1	0.85041	0.677966	0.0548977
rps6ka1	0.228152	1.38674e-08	1.8365	0.811321	0.19367	0.0385725	1.47874	0.756757	0.145425	0.0807266	1.01473	0.788462	0.113525	1	0.735326	0.388889	0.068627	1	0.386408	0.291667	0.0978103	1	0.606844	0.296296	0.0383733	1	0.187148	0.0888889	0.040434	1	0.199617	0.134615	0.0292577	1	0.13424	0.111111	0.0317466	0.160466	0.148306	0.140845	0.0476814	1	0.244843	0.308642	0.0680544	1	0.382341	0.474576	0.0948855
rerea	0.22683	1.01331e-08	1.86222	0.849057	0.099331	1	0.632509	0.648649	0.0626875	1	0.352259	0.403846	0.0758462	1	0.448159	0.322222	0.0529185	1	0.284872	0.25	0.0923308	1	0.575891	0.296296	0.0996926	1	0.635471	0.266667	0.112458	1	0.742261	0.346154	0.0888954	1	0.548611	0.355556	0.0929477	1	0.580826	0.43662	0.105541	1	0.683863	0.592593	0.0959651	1	0.605115	0.677966	0.0888904
fibpb	0.225753	6.84546e-15	1.87451	0.886792	0.143782	1	1.03484	0.810811	0.156772	0.0008733	1.15892	0.826923	0.0900869	1	0.565265	0.444444	0.0513256	1	0.277766	0.208333	0.0447917	0.0117653	0.234506	0.135802	0.0153014	4.67616e-05	0.0636377	0.0222222	0.0134524	1.05195e-05	0.0546003	0.0384615	0.0308571	0.246313	0.148269	0.0888889	0.0339603	0.121228	0.166711	0.169014	0.0786721	1	0.475558	0.555556	0.0884707	1	0.552328	0.627119	0.0839426
ldhbb	0.225303	1.16113e-17	2.84707	0.943396	0.116737	1	1.2017	0.972973	0.138158	1	1.49591	0.826923	0.0751221	1	0.68296	0.433333	0.0394972	1	0.30568	0.208333	0.0595523	0.0106483	0.509461	0.234568	0.0785255	1	0.722492	0.311111	0.0434681	0.189166	0.344092	0.211538	0.0778089	1	0.714122	0.422222	0.0869432	1	0.822601	0.478873	0.0726954	1	0.655115	0.62963	0.082633	1	0.770933	0.661017	0.105702
tpm4a	0.225144	1.19891e-15	2.28227	0.943396	0.150211	0.153873	1.33893	0.945946	0.102875	1	0.818986	0.615385	0.104673	1	0.837472	0.511111	0.0973789	1	0.763163	0.333333	0.0992513	1	0.782067	0.358025	0.103966	1	0.830195	0.311111	0.12498	1	1.05343	0.442308	0.0743635	1	0.540979	0.333333	0.0426166	0.0551463	0.269412	0.197183	0.0479613	1	0.311926	0.444444	0.0554213	1	0.373559	0.491525	0.0736979
nfe2l2a	0.222889	6.55324e-09	1.37753	0.849057	0.137814	1	0.731795	0.783784	0.14543	1	0.785053	0.692308	0.15076	1	0.82291	0.455556	0.121928	1	0.623998	0.375	0.174594	1	0.997808	0.37037	0.0498052	0.914873	0.199967	0.0444444	0.0449913	1	0.176239	0.0769231	0.0235498	1	0.0798001	0.0666667	0.0348083	0.792381	0.128427	0.126761	0.0358745	1	0.133273	0.17284	0.0718333	1	0.316703	0.40678	0.0665154
znf609a	0.222178	4.1206e-18	4.31902	0.962264	0.160792	0.0305318	2.81937	0.972973	0.117341	1	1.86945	0.807692	0.111802	1	1.75607	0.755556	0.122524	1	1.97721	0.708333	0.0884282	1	1.29899	0.518519	0.0506545	0.0473633	0.643025	0.288889	0.0520207	0.00421895	0.664721	0.288462	0.0459586	0.495579	0.569748	0.355556	0.0760056	1	1.07116	0.56338	0.0907159	1	1.34213	0.851852	0.0766353	1	1.08244	0.864407	0.0877407
sncb	0.22112	3.9719e-20	4.39219	1	0.178024	3.23775e-06	3.29861	1	0.183251	1.09717e-10	3.42682	0.980769	0.171616	5.13587e-13	3.1432	0.888889	0.138387	1	2.37082	0.75	0.123065	1	2.03504	0.617284	0.0851692	1	1.26711	0.444444	0.0799666	1	1.16932	0.461538	0.0266664	1	0.298928	0.2	0.0111169	5.77525e-09	0.104926	0.0985915	0.0107638	8.00231e-12	0.101006	0.0864198	0.00212928	3.93957e-11	0.0155111	0.0338983	0.00279359
gig2o	0.221063	1.96637e-16	2.46998	0.924528	0.228357	8.83924e-12	2.57841	1	0.167567	8.17637e-07	1.71356	0.884615	0.0714284	1	0.569984	0.322222	0.0356482	1	0.239708	0.125	0.0581395	1	0.439788	0.222222	0.0942168	1	0.811073	0.311111	0.0903017	1	0.768155	0.346154	0.0524483	1	0.386612	0.266667	0.0458219	1	0.326796	0.28169	0.0362652	1	0.244815	0.283951	0.0278046	1	0.176925	0.305085	0.0322189
NDUFAF8	0.2209	7.03009e-14	2.55831	0.90566	0.176781	0.00135958	1.90621	0.918919	0.12822	1	1.25192	0.807692	0.0749552	1	0.628161	0.377778	0.0491316	1	0.369489	0.208333	0.0255672	8.18712e-12	0.165665	0.0864198	0.0144821	7.51555e-07	0.0837179	0.0444444	1.11022e-16	9.02317e-14	0	0	0.0430039	1	0.313187	0.244444	0.0999615	1	0.907298	0.591549	0.111892	1	1.04924	0.777778	0.101556	1	0.925952	0.711864	0.0961604
FO744833.2	0.220467	2.45155e-09	1.48153	0.811321	0.215134	0.000325486	1.4343	0.783784	0.141548	1	0.826865	0.634615	0.0518522	1	0.22943	0.188889	0.0301829	1	0.117701	0.0416667	0.0403413	0.0201006	0.168028	0.0987654	0.0746226	1	0.362664	0.133333	0.0785611	1	0.38714	0.192308	0.109314	1	0.591129	0.377778	0.104996	1	0.561184	0.394366	0.0624799	1	0.289791	0.320988	0.0759537	1	0.370892	0.491525	0.0594247
smim4	0.219719	4.05922e-27	4.03488	1	0.158461	0.000272071	2.62225	1	0.117597	1	1.77739	0.865385	0.130224	0.016151	2.02907	0.822222	0.100224	1	1.44601	0.583333	0.0812035	1	1.10464	0.45679	0.0731853	1	0.967991	0.311111	0.0603528	1	0.759016	0.346154	0.0597431	1	0.7494	0.377778	0.0406715	0.0471543	0.46433	0.338028	0.0394026	1	0.446521	0.469136	0.0420992	1	0.484551	0.610169	0.0581613
map1lc3b	0.219485	1.76648e-11	1.44357	0.886792	0.158508	0.241189	0.939853	0.837838	0.13116	1	0.733772	0.673077	0.154453	0.854856	0.908458	0.577778	0.0573099	1	0.254849	0.166667	0.133741	1	0.752636	0.345679	0.108263	1	0.572217	0.244444	0.131757	1	0.738127	0.346154	0.0686594	1	0.319899	0.222222	0.0215953	0.000688748	0.0768709	0.0704225	0.0152708	3.10453e-05	0.0507478	0.0864198	0.0228308	1	0.0822077	0.169492	0.0227883
nras	0.218984	3.3155e-12	1.92673	0.886792	0.107915	1	0.762867	0.648649	0.10462	1	0.732965	0.673077	0.125715	1	0.92963	0.588889	0.101784	1	0.707482	0.458333	0.0925945	1	0.626542	0.271605	0.0639143	1	0.391273	0.155556	0.0455579	0.649728	0.256284	0.153846	0.033307	0.933501	0.174205	0.155556	0.0852818	1	0.563981	0.43662	0.0696563	1	0.436135	0.444444	0.0701141	1	0.439762	0.59322	0.0683193
casp7	0.218287	3.3925e-09	1.65382	0.830189	0.186165	0.0163048	1.34012	0.837838	0.144779	0.11602	0.963224	0.807692	0.0769713	1	0.426651	0.344444	0.0581359	1	0.299411	0.208333	0.0873171	1	0.501005	0.259259	0.113445	1	0.701431	0.311111	0.0821461	1	0.463466	0.230769	0.0843106	1	0.47909	0.288889	0.0560105	1	0.285762	0.239437	0.040582	1	0.191451	0.271605	0.0827865	1	0.468075	0.508475	0.0623057
mtfr1	0.218125	5.33342e-08	1.27548	0.811321	0.13804	1	0.698729	0.648649	0.139285	1	0.706963	0.730769	0.0800473	1	0.346195	0.277778	0.0391774	1	0.141514	0.125	0.0787719	1	0.339194	0.185185	0.0934019	1	0.421594	0.177778	0.0729632	1	0.30777	0.173077	0.0566486	1	0.223757	0.155556	0.0715914	1	0.30046	0.225352	0.0935907	1	0.422686	0.481481	0.0776951	1	0.333311	0.525424	0.0856496
cbr1l	0.217922	1.85409e-18	3.74061	0.981132	0.143367	0.797369	2.15568	0.918919	0.134299	0.00741054	1.9795	0.961538	0.147085	0.000107014	2.22905	0.822222	0.104265	1	1.42593	0.708333	0.106828	1	1.47128	0.530864	0.0651886	1	0.783786	0.244444	0.0420648	0.63583	0.453661	0.25	0.022659	8.55688e-06	0.213091	0.111111	0.0191465	2.8612e-10	0.173982	0.15493	0.0341359	1	0.350799	0.45679	0.0492091	1	0.551116	0.59322	0.0747988
rtn1a	0.215239	1.22587e-13	2.73482	0.962264	0.134027	1	1.46727	0.891892	0.115637	1	1.21133	0.769231	0.0909262	1	0.888912	0.511111	0.0359636	1	0.277947	0.166667	0.0872181	1	0.84282	0.358025	0.124598	1	1.33442	0.533333	0.152277	1	1.73358	0.653846	0.153385	1	1.75013	0.666667	0.0555463	1	0.476433	0.338028	0.0485933	1	0.403219	0.469136	0.0354193	1	0.272789	0.389831	0.0392671
inpp5b	0.215095	6.13949e-12	1.52183	0.90566	0.1314	1	0.796409	0.837838	0.12575	1	0.752157	0.75	0.101857	1	0.572744	0.4	0.0682406	1	0.343712	0.208333	0.102536	1	0.577663	0.271605	0.042609	0.48085	0.190792	0.0888889	0.0898313	1	0.48747	0.211538	0.0637881	1	0.315676	0.222222	0.0831395	1	0.441585	0.352113	0.0669052	1	0.335242	0.407407	0.0770283	1	0.400705	0.508475	0.0603821
tapbp.1	0.214949	8.45344e-13	1.7344	0.886792	0.142906	1	1.01357	0.783784	0.169934	1.8557e-07	1.27198	0.846154	0.0898243	1	0.556004	0.411111	0.10025	1	0.6401	0.291667	0.092428	1	0.576719	0.296296	0.0560386	1	0.306051	0.111111	0.0217789	0.0332613	0.0959196	0.0576923	0.00930671	0.00151451	0.0348933	0.0222222	0.046104	1	0.239971	0.197183	0.0381085	1	0.189627	0.259259	0.0367055	1	0.181074	0.338983	0.0382695
pon1	0.214684	5.90579e-10	1.38395	0.830189	0.1859	0.0106933	1.14427	0.810811	0.122737	1	0.664485	0.557692	0.084137	1	0.408765	0.344444	0.0941797	1	0.472168	0.333333	0.112723	1	0.595114	0.296296	0.0874982	1	0.429725	0.155556	0.103674	1	0.534195	0.25	0.0960847	1	0.484454	0.333333	0.0283743	0.0617529	0.105624	0.0985915	0.0217741	0.00453612	0.0766432	0.123457	0.0516037	1	0.220665	0.355932	0.0642389
pgam1b	0.213243	7.72118e-15	1.64782	0.962264	0.197565	2.57323e-06	1.4896	0.918919	0.164557	0.000128487	1.17076	0.807692	0.124533	1	0.813458	0.5	0.0424887	1	0.208235	0.125	0.0261209	1.93917e-06	0.114748	0.0617284	0.0104137	0.000510605	0.0382382	0.0222222	0.0195263	0.000777391	0.0807581	0.0384615	0.0107664	0.000537646	0.0397693	0.0222222	0.0442442	1	0.218938	0.169014	0.0377086	1	0.179721	0.234568	0.077357	1	0.441253	0.491525	0.112907
ribc2	0.213078	1.65149e-12	3.17805	0.924528	0.140256	1	1.83346	0.891892	0.0952661	1	1.11132	0.788462	0.0768826	1	0.845256	0.588889	0.0320803	1	0.284554	0.166667	0.137043	1	1.77884	0.617284	0.0941839	1	1.09515	0.355556	0.140051	1	1.82997	0.673077	0.0987047	1	1.16308	0.577778	0.0364185	0.00154104	0.332429	0.323944	0.0379659	0.172929	0.349889	0.45679	0.0747875	1	0.81613	0.677966	0.0836972
gnb2	0.21294	1.65637e-06	1.85894	0.811321	0.115623	1	0.835024	0.72973	0.115758	1	0.836286	0.711538	0.163522	1	1.31231	0.644444	0.123652	1	0.910965	0.541667	0.130713	1	0.979163	0.432099	0.064078	1	0.393011	0.177778	0.0304342	0.000500358	0.156204	0.0961538	0.044009	1	0.245824	0.177778	0.0444319	0.0436458	0.248755	0.197183	0.0724762	1	0.459151	0.518519	0.0871089	1	0.580157	0.627119	0.0849133
psme1	0.212645	1.76466e-21	8.40501	1	0.134022	1	4.5821	0.972973	0.104555	1	3.32151	0.980769	0.0458627	0.645334	1.17195	0.655556	0.0178602	0.000170807	0.371508	0.208333	0.0522379	7.37894e-07	1.378	0.419753	0.0968749	1	3.01104	0.688889	0.165491	9.55045e-06	6.03857	0.961538	0.181471	1.57535e-07	6.81738	0.977778	0.110497	1	3.56701	0.915493	0.0671976	1	1.89018	0.91358	0.0440043	1	1.11336	0.779661	0.0257608
gpd1b	0.2121	2.27114e-14	5.4054	0.981132	0.159276	0.0767628	3.70574	0.972973	0.0934892	1	1.85637	0.884615	0.0867898	1	1.68789	0.688889	0.0757679	1	1.41986	0.625	0.109991	1	2.28819	0.666667	0.0936885	1	1.86144	0.533333	0.113108	1	2.37235	0.692308	0.0924343	1	1.82957	0.822222	0.0665882	1	1.2058	0.690141	0.0623492	1	1.10992	0.777778	0.07132	1	1.31507	0.813559	0.0737493
pho	0.212009	4.86119e-37	38.4026	1	0.143874	0.00782903	23.0573	1	0.135144	0.0152561	21.2482	1	0.133549	9.74496e-08	20.9221	1	0.153314	1	25.0566	1	0.0595295	1	7.44411	0.790123	0.0234923	6.79978e-09	2.36993	0.555556	0.0114573	8.54911e-27	1.0051	0.288462	0.0446329	1	5.19772	0.755556	0.103493	1	15.037	1	0.102768	1	14.9015	0.987654	0.0846711	1	11.6257	0.966102	0.0804295
glod5	0.211066	1.02784e-18	6.99424	0.981132	0.156696	0.0108495	4.72375	0.972973	0.15931	6.16861e-09	4.8274	1	0.149124	3.53806e-07	4.42697	0.933333	0.130507	1	3.71978	0.875	0.131712	1	3.76454	0.790123	0.0919752	1	2.36754	0.622222	0.0477229	1	1.03476	0.461538	0.0317911	0.00176303	0.62717	0.355556	0.0222902	1.81574e-12	0.407497	0.323944	0.0296015	0.000129246	0.574841	0.592593	0.0397874	1	0.826116	0.694915	0.0670001
rgs17	0.210678	3.13479e-10	1.00948	0.849057	0.136363	1	0.569858	0.621622	0.0837935	1	0.304093	0.442308	0.105454	1	0.408341	0.288889	0.0599187	1	0.198941	0.125	0.0836172	1	0.303277	0.17284	0.0856573	1	0.312749	0.133333	0.135337	1	0.564273	0.307692	0.116525	1	0.46456	0.288889	0.0753909	1	0.265847	0.211268	0.0448401	1	0.138568	0.197531	0.0421707	1	0.128428	0.237288	0.0723881
C5H11orf54	0.210293	4.55067e-15	3.22103	0.981132	0.105537	1	1.30741	0.810811	0.0940932	1	1.12805	0.826923	0.0675112	1	0.739435	0.455556	0.0876385	1	1.02997	0.541667	0.0798776	1	0.915117	0.358025	0.0814077	1	0.937488	0.377778	0.103581	1	1.27627	0.480769	0.0715119	1	0.795251	0.444444	0.0612113	1	0.653601	0.43662	0.0774671	1	0.880152	0.740741	0.0841708	1	0.978227	0.79661	0.095084
gstm.3	0.20924	6.52294e-13	4.71776	0.943396	0.206215	5.3721e-08	4.62779	1	0.156959	4.0251e-07	3.23018	0.980769	0.0831547	1	1.42016	0.655556	0.0526695	1	0.798326	0.458333	0.068585	1	1.11219	0.419753	0.117577	1	2.21649	0.577778	0.0902579	1	1.57689	0.596154	0.0694228	1	1.12939	0.555556	0.0464901	1	0.683446	0.43662	0.0331548	0.455668	0.450494	0.518519	0.0369948	1	0.515344	0.627119	0.0622217
fthl30	0.208782	9.38864e-13	2.12847	0.90566	0.147943	1	1.35259	0.810811	0.179286	0.000320696	1.74079	0.826923	0.0683819	1	0.501353	0.366667	0.0464334	1	0.308773	0.208333	0.0938292	1	0.74986	0.345679	0.115991	1	0.985413	0.333333	0.112187	1	0.943812	0.403846	0.0805778	1	0.617329	0.311111	0.0487123	1	0.327718	0.253521	0.0441099	1	0.289727	0.382716	0.0407756	1	0.262887	0.355932	0.0652327
ube2e2	0.207818	6.12174e-10	2.2214	0.90566	0.140925	1	1.33289	0.837838	0.138312	1	1.30072	0.769231	0.121015	1	1.0932	0.633333	0.144222	1	1.37378	0.666667	0.0705678	1	0.547817	0.259259	0.0784006	1	0.62604	0.266667	0.0720322	1	0.562243	0.269231	0.0369174	0.0693955	0.244225	0.155556	0.0505363	1	0.360242	0.295775	0.0828368	1	0.671471	0.654321	0.08104	1	0.652974	0.694915	0.0807858
kmt2bb	0.207709	3.25301e-31	9.25466	1	0.148719	0.00031063	5.96199	1	0.135976	0.000354467	5.30359	1	0.132629	1.30973e-06	5.13412	0.977778	0.16727	0.0453087	6.95588	1	0.0803055	1	2.69089	0.679012	0.0761931	1	2.51697	0.666667	0.0469024	0.000300423	1.3687	0.538462	0.0401654	9.39244e-05	1.12963	0.511111	0.0641368	1	2.02436	0.84507	0.0696065	1	2.24458	0.938272	0.0628057	1	1.97162	0.932203	0.0724152
TIMM21	0.207478	1.54475e-09	1.5261	0.849057	0.187741	2.98551e-05	1.33735	0.918919	0.0975079	1	0.569539	0.634615	0.0959808	1	0.558114	0.433333	0.0620079	1	0.320407	0.25	0.0470395	0.00268185	0.226854	0.123457	0.0139724	2.48276e-05	0.0519949	0.0222222	0.0184207	1.58867e-05	0.0723139	0.0384615	0.0191875	4.24558e-05	0.07594	0.0222222	0.0480571	1	0.232969	0.197183	0.0924847	1	0.532182	0.604938	0.0964623	1	0.56171	0.644068	0.116025
tmsb4x	0.206625	5.42348e-12	8.66782	0.981132	0.0977127	1	3.26126	0.891892	0.120112	1	4.25663	0.923077	0.162739	7.95989e-07	6.32756	0.9	0.196154	8.45191e-05	8.09218	1	0.15749	3.15318e-08	6.06107	0.91358	0.140744	0.0214062	5.23183	0.955556	0.072702	1	2.23667	0.596154	0.0455929	1	1.24623	0.488889	0.0139467	2.47082e-10	0.29628	0.28169	0.0159824	3.73477e-10	0.348465	0.345679	0.0127493	1.69742e-06	0.266342	0.389831	0.0181355
nme5	0.206275	6.40578e-12	2.86501	0.924528	0.200802	1.07933e-06	2.76498	0.972973	0.0882316	1	0.947935	0.673077	0.087916	1	0.943603	0.477778	0.0900048	1	0.972366	0.583333	0.152031	1	1.91716	0.604938	0.147296	1	1.83938	0.555556	0.121129	1	1.42563	0.538462	0.101969	1	1.14126	0.577778	0.0370176	1	0.319164	0.309859	0.0280446	0.0275337	0.227269	0.259259	0.00835574	2.69085e-07	0.0536387	0.101695	0.00874592
abhd17c	0.206171	1.04409e-14	2.57156	0.943396	0.13819	1	1.51992	0.918919	0.114803	1	1.19449	0.884615	0.0731881	1	0.671148	0.466667	0.0656523	1	0.585021	0.458333	0.0300808	1.10717e-12	0.222324	0.111111	0.0479569	0.0303766	0.394831	0.155556	0.0161501	2.84015e-11	0.104983	0.0384615	0.0564366	1	0.483767	0.266667	0.0948487	1	0.93401	0.577465	0.0925368	1	0.904929	0.753086	0.102768	1	1.03539	0.813559	0.146835
tmem243b	0.205805	5.64256e-10	1.72163	0.886792	0.13734	1	1.01179	0.72973	0.134457	1	0.984179	0.769231	0.157783	0.00492449	1.21316	0.666667	0.134189	1	0.981624	0.541667	0.117982	1	0.830435	0.37037	0.022447	0.00355448	0.104591	0.0444444	0.0503465	1	0.281487	0.153846	0.0559421	1	0.321081	0.2	0.0390667	1	0.205563	0.197183	0.0319895	0.0743298	0.160835	0.197531	0.0375572	1	0.195825	0.322034	0.062687
akap1b	0.205528	1.16806e-22	4.23188	1	0.153062	0.0186515	2.87073	0.972973	0.143939	0.000762668	2.64891	0.961538	0.119285	1	2.07423	0.8	0.0977705	1	1.6047	0.583333	0.0422261	1.19051e-08	0.557198	0.283951	0.0308847	2.22863e-07	0.379399	0.155556	0.0312352	1.24582e-07	0.384665	0.192308	0.0403335	0.030775	0.52651	0.311111	0.0724253	1	1.09442	0.619718	0.083239	1	1.30609	0.864198	0.0761395	1	1.16607	0.881356	0.110447
plekha5	0.205211	1.29748e-09	1.39074	0.830189	0.155143	1	0.962227	0.756757	0.139427	1	0.836762	0.692308	0.0760991	1	0.383733	0.322222	0.129991	1	0.763728	0.333333	0.0899251	1	0.474706	0.234568	0.0661546	1	0.321422	0.155556	0.100426	1	0.546958	0.269231	0.034489	1	0.143008	0.0888889	0.0367654	0.503585	0.154686	0.140845	0.0506554	1	0.230003	0.320988	0.0549396	1	0.254539	0.355932	0.102247
brd8	0.204945	3.98355e-31	14.0424	1	0.126951	0.654968	7.49047	1	0.125466	0.751441	7.37685	0.980769	0.0740816	1	3.75117	0.933333	0.0731643	1	3.69239	0.958333	0.0993698	1	5.45742	0.925926	0.105309	1	5.8808	0.888889	0.106435	1	5.962	0.903846	0.0742724	1	3.76342	0.911111	0.0667347	1	3.28699	0.943662	0.0688002	1	3.41596	0.987654	0.066438	1	3.26856	0.983051	0.0711171
hcls1	0.204839	3.62958e-11	1.75989	0.924528	0.194524	0.000332176	1.64377	0.864865	0.136735	1	1.03476	0.769231	0.0816522	1	0.53236	0.4	0.0857859	1	0.566961	0.333333	0.101308	1	0.701646	0.333333	0.098096	1	0.673178	0.288889	0.0971172	1	0.664563	0.288462	0.0743911	1	0.472938	0.311111	0.0328767	0.00183198	0.171068	0.140845	0.0500398	1	0.287343	0.37037	0.0693236	1	0.432528	0.508475	0.0822036
si:ch211-285j22.3	0.204663	4.33552e-12	3.58698	0.981132	0.134266	1	2.06185	0.918919	0.074326	1	0.963956	0.711538	0.0678112	1	0.858316	0.488889	0.0481938	1	0.559524	0.291667	0.131654	1	2.00975	0.679012	0.150095	1	2.38493	0.666667	0.182113	0.101901	3.07469	0.769231	0.148766	1	2.35731	0.866667	0.0495453	1	0.579115	0.394366	0.0330664	0.000142642	0.351529	0.308642	0.0356437	1	0.385418	0.457627	0.0283024
atp6v1e1a	0.204395	5.15115e-13	3.43216	0.962264	0.153852	0.00415108	2.36118	0.972973	0.105773	1	1.45067	0.903846	0.0568289	0.0854321	0.658782	0.4	0.0623435	1	0.739994	0.333333	0.0502037	3.18652e-06	0.564283	0.259259	0.0893355	1	1.16783	0.488889	0.117651	1	1.66458	0.634615	0.0851509	1	1.0984	0.6	0.0527538	1	0.600248	0.43662	0.0554382	1	0.638662	0.62963	0.125179	0.725604	1.80405	0.932203	0.123309
dctpp1	0.204203	1.13656e-23	9.73597	1	0.124298	0.255138	5.07709	1	0.189297	1.51285e-21	8.80851	1	0.118449	0.031902	4.76931	0.922222	0.0869683	1	3.20496	0.833333	0.0488079	1	1.5474	0.62963	0.0553608	1	1.81077	0.577778	0.0237542	4.37376e-11	0.639909	0.269231	0.00894672	2.03281e-16	0.200131	0.155556	0.0342692	0.00336556	0.999809	0.577465	0.0582584	1	1.93026	0.925926	0.0612799	1	2.05676	0.949153	0.0814146
pvalb2	0.203029	9.56026e-07	2.75821	0.811321	0.128144	1	1.5079	0.756757	0.0433935	1	0.381753	0.384615	0.0534253	1	0.494425	0.366667	0.0671106	1	0.658346	0.416667	0.136534	1	1.63772	0.432099	0.238667	0.000791322	3.41632	0.688889	0.219454	2.44003e-05	3.0571	0.711538	0.0856161	1	0.896789	0.377778	0.0240136	1	0.18509	0.169014	0.0104181	1.5439e-05	0.0683307	0.111111	0.0181552	1	0.132177	0.220339	0.00771387
sord	0.20292	1.90549e-13	1.77115	0.962264	0.139396	1	1.08126	0.891892	0.164681	0.00290001	1.34503	0.826923	0.129929	1	0.986554	0.555556	0.0871573	1	0.58955	0.458333	0.0373866	6.24319e-07	0.204105	0.111111	0.0265823	0.000846101	0.134528	0.0666667	1.11022e-16	5.73245e-12	0	0	0.016429	0.000154483	0.0753672	0.0666667	0.0519809	1	0.307027	0.239437	0.0843003	1	0.564993	0.567901	0.100804	1	0.710404	0.728814	0.108425
coq9	0.202462	4.03289e-13	3.71809	0.981132	0.181969	8.79247e-06	3.22959	0.972973	0.152842	0.00145944	2.56796	0.923077	0.152326	1.83052e-06	2.55662	0.844444	0.13114	1	2.10246	0.666667	0.135236	1	2.18841	0.666667	0.0762029	1	1.04616	0.333333	0.0516849	0.870845	0.641868	0.230769	0.0199863	0.000360824	0.200696	0.155556	0.0247092	7.86349e-07	0.259235	0.211268	0.0311768	0.105253	0.343958	0.407407	0.0365286	1	0.417654	0.423729	0.0469093
tmem126a	0.2024	4.05621e-08	1.85097	0.849057	0.19089	1.32658e-05	1.71324	0.945946	0.146902	1	1.21425	0.730769	0.105822	1	0.79303	0.477778	0.096575	1	0.705024	0.375	0.0505153	0.086401	0.310675	0.17284	0.0319303	0.00818127	0.176375	0.0666667	0.044981	1	0.268948	0.153846	0.0448403	1	0.267905	0.177778	0.0562512	1	0.355343	0.309859	0.0611438	1	0.394531	0.493827	0.0701009	1	0.468732	0.59322	0.0866438
dynlrb2	0.202312	3.38485e-11	3.41507	0.943396	0.179518	9.43413e-06	2.91671	0.972973	0.115384	1	1.63709	0.75	0.0490398	1	0.552743	0.366667	0.0675829	1	0.826231	0.375	0.0555532	1	0.645816	0.296296	0.0919719	1	1.22252	0.377778	0.150935	1	2.32248	0.634615	0.161837	0.136625	2.54487	0.822222	0.0944059	1	1.26414	0.633803	0.0529834	1	0.608691	0.54321	0.0427153	1	0.465712	0.508475	0.0290863
fthl27	0.202268	2.80345e-21	28.0342	1	0.0988463	1	11.0112	1	0.162136	5.88253e-12	20.9475	1	0.131667	4.57563e-11	15.9557	1	0.109926	1	12.6263	1	0.131435	2.24454e-10	15.9192	1	0.111997	1	12.9344	0.933333	0.0690947	1	6.97673	0.942308	0.0368988	1	3.19242	0.777778	0.0126149	9.45637e-24	0.874988	0.549296	0.0149822	2.57217e-18	1.07329	0.740741	0.0191181	7.23223e-06	1.43644	0.864407	0.0495102
snd1	0.201544	4.53223e-10	1.75648	0.867925	0.130832	1	0.996166	0.783784	0.122496	1	0.914462	0.730769	0.0841947	1	0.564472	0.377778	0.0620675	1	0.383656	0.166667	0.040331	0.000424703	0.224244	0.135802	0.0444665	1	0.253017	0.111111	0.0242855	0.000757033	0.12065	0.0769231	0.0928733	1	0.639896	0.333333	0.0698929	1	0.445624	0.380282	0.0654082	1	0.409834	0.469136	0.0954322	1	0.662589	0.644068	0.130987
hmgn7	0.201114	1.8354e-19	11.4588	1	0.121033	1	5.89005	1	0.167802	2.73457e-11	9.02533	1	0.184125	8.7942e-30	10.1987	1	0.166703	0.523483	8.94775	0.958333	0.0684081	1	2.8373	0.654321	0.0258809	7.94522e-08	0.852575	0.288889	0.0156049	6.29115e-15	0.464006	0.211538	0.00654986	1.04548e-17	0.166944	0.133333	0.0257532	2.65963e-06	0.847475	0.549296	0.0515834	1	1.99082	0.962963	0.060856	1	2.44851	0.983051	0.076645
ccdc47	0.200881	3.02185e-12	3.894	0.943396	0.0873716	1	1.31772	0.918919	0.0933606	1	1.43439	0.961538	0.0892303	1	1.35365	0.722222	0.0511238	1	0.670052	0.375	0.0609366	1.86431e-07	0.834735	0.333333	0.0845681	1	1.26398	0.422222	0.067604	0.563034	0.951357	0.384615	0.100669	1	1.58012	0.688889	0.0992566	1	1.55168	0.746479	0.115603	1	1.88889	0.925926	0.111055	1	1.79336	0.898305	0.113994
dap	0.200621	6.56372e-19	4.12365	0.981132	0.129209	1	2.31499	0.918919	0.140607	0.0453795	2.58464	0.961538	0.0950257	1	1.55646	0.7	0.0552212	1	0.78262	0.416667	0.0330746	1.44235e-13	0.415045	0.234568	0.0283845	2.36069e-08	0.344362	0.155556	0.0267304	5.8672e-09	0.320117	0.192308	0.0545507	1	0.770754	0.422222	0.103224	1	1.73112	0.802817	0.111919	0.586432	1.92152	0.962963	0.103173	1	1.73002	0.915254	0.103622
tp53bp1	0.200185	9.42389e-11	2.9808	0.962264	0.1204	1	1.53114	0.891892	0.152719	0.00173114	2.08755	0.942308	0.135962	1	1.79334	0.788889	0.133864	1	1.75737	0.625	0.10491	1	1.28143	0.469136	0.0970575	1	1.1594	0.4	0.0483385	0.0407421	0.480553	0.269231	0.0441851	0.254758	0.429841	0.288889	0.0915789	1	1.07616	0.633803	0.0784354	1	0.883147	0.740741	0.0620229	1	0.656332	0.694915	0.0481562
fgfr1op2	0.200063	3.40749e-08	1.77537	0.849057	0.15143	0.51306	1.2306	0.864865	0.106508	1	0.778865	0.692308	0.0982959	1	0.702439	0.444444	0.0756362	1	0.50268	0.375	0.0907956	1	0.634461	0.308642	0.0497724	1	0.297061	0.133333	0.0308555	0.00226777	0.164748	0.0961538	0.0645695	1	0.411551	0.244444	0.0624906	1	0.394941	0.267606	0.0682194	1	0.44111	0.493827	0.0810598	1	0.548936	0.610169	0.0818078
cd74b	0.181657	0.135728	0.632032	0.528302	0.323218	2.1156e-12	1.35285	0.810811	0.173598	0.0303477	0.595365	0.596154	0.0770396	1	0.208063	0.177778	0.0424615	1	0.0986246	0.0416667	0.0545692	1	0.134732	0.0987654	0	0.393244	0	0	0.103006	1	0.30166	0.153846	0.0985107	1	0.284834	0.177778	0.0436666	1	0.102101	0.0985915	0.0505397	1	0.12243	0.17284	0.0441145	1	0.103399	0.169492	0.0386591
dhrs1	0.177773	0.0216936	0.765635	0.584906	0.307023	1.34254e-16	1.57611	0.918919	0.234065	1.32716e-14	1.10125	0.846154	0.0864292	1	0.300229	0.277778	0.0218372	1	0.0545843	0.0416667	0	1.63191e-07	0	0	0.0287327	1	0.0761172	0.0444444	0.0337703	1	0.0927231	0.0384615	0.0161362	1	0.03797	0.0222222	0.0370409	1	0.103867	0.0704225	0.0202151	0.00980249	0.0497399	0.037037	0.0234021	1	0.0593413	0.135593	0.0814687
cox4i2	0.232919	7.92388e-06	0.809813	0.584906	0.285861	1.88112e-10	1.0618	0.810811	0.199261	0.00395629	0.65875	0.557692	0.0392352	1	0.0825236	0.0888889	0.0509181	1	0.113998	0.0833333	0.0390562	1	0.0820596	0.037037	0	1	0	0	0.0375091	1	0.0780748	0.0576923	0.109808	1	0.302205	0.222222	0.0894448	1	0.232173	0.183099	0.0478138	1	0.105412	0.17284	0.0294543	1	0.0580673	0.101695	0.0119757
serpinb1l1	0.24517	6.78036e-06	0.816155	0.566038	0.272158	5.35913e-11	0.937088	0.837838	0.165826	1	0.486978	0.480769	0.0848077	1	0.204264	0.144444	0.0939782	1	0.232928	0.0833333	0.0596312	1	0.130804	0.0617284	0.0535464	1	0.114311	0.0444444	0.0917305	1	0.225814	0.134615	0.071929	1	0.165683	0.111111	0.0345247	1	0.0664032	0.0422535	0.0315984	1	0.0595789	0.0987654	0.0288687	1	0.05336	0.0847458	0.00669564
zgc:123244	0.207998	1.14717e-06	0.714742	0.679245	0.271577	2.23296e-09	1.01726	0.810811	0.124098	1	0.362996	0.403846	0.0615112	1	0.14806	0.133333	0.0760316	1	0.193508	0.125	0.0122409	0.00444278	0.0207464	0.0123457	0.0269115	1	0.0533348	0.0222222	0.147288	1	0.453819	0.211538	0.135379	1	0.406507	0.288889	0.063064	1	0.152776	0.140845	0.018134	1	0.0331271	0.0617284	0.0511	1	0.117388	0.186441	0.0557264
si:ch211-160o17.3	0.293186	6.41045e-15	1.09113	0.735849	0.270979	9.71371e-10	0.98336	0.810811	0.151694	1	0.45728	0.5	0.102067	1	0.273341	0.211111	0.124982	1	0.355181	0.208333	0.0726803	1	0.177181	0.0987654	0.032281	1	0.0645457	0.0222222	0.0189515	1	0.0338602	0.0192308	0.0228994	1	0.042523	0.0222222	0.0100011	1	0.0158455	0.028169	0	0.000608564	0	0	0.00580785	1	0.00839683	0.0169492	0.0273118
bicc1a	0.0802637	1	0.286468	0.377358	0.255978	2.77376e-09	1.29997	0.864865	0.280591	4.68138e-18	1.46774	0.865385	0.109016	1	0.424148	0.3	0.100154	1	0.380251	0.291667	0.0501122	1	0.15832	0.0864198	0.0388857	1	0.115628	0.0444444	0.0293245	1	0.0818214	0.0384615	0.056643	1	0.184496	0.111111	0.0712418	1	0.24624	0.225352	0.045508	1	0.140445	0.197531	0.0406503	1	0.122134	0.20339	0.0561749
tg	0.187323	0.00051502	0.814521	0.622642	0.252521	1.24359e-10	1.20905	0.891892	0.144727	1	0.580404	0.480769	0.0761376	1	0.253672	0.211111	0.0581153	1	0.180418	0.125	0.110899	1	0.410628	0.185185	0.115753	1	0.434019	0.111111	0.0386121	1	0.108545	0.0576923	0.0256414	1	0.0658161	0.0444444	0.0253296	1	0.0648468	0.084507	0.0210725	1	0.0519207	0.0864198	0.0242955	1	0.0616542	0.101695	0.0416086
si:ch211-281l24.3	0.152502	1	0.620392	0.566038	0.251044	2.52398e-08	1.19749	0.837838	0.188066	0.0014174	0.817273	0.673077	0.124531	1	0.476294	0.355556	0.105668	1	0.385093	0.25	0.102562	1	0.370572	0.17284	0.129459	1	0.500936	0.222222	0.0529943	1	0.160454	0.0961538	0.0235382	1	0.0592275	0.0444444	0.030857	1	0.0822968	0.0704225	0.0263321	1	0.0678479	0.123457	0.0416812	1	0.119069	0.152542	0.0340114
rnf114	0.193623	5.14522e-06	1.61519	0.792453	0.235563	1.07255e-09	2.09335	0.918919	0.148946	0.0426448	1.14397	0.788462	0.0841205	1	0.54668	0.344444	0.0566525	1	0.331717	0.208333	0.0892683	1	0.589764	0.283951	0.0772442	1	0.490448	0.2	0.120609	1	0.868954	0.403846	0.107605	1	0.749733	0.466667	0.0646096	1	0.391259	0.295775	0.0311894	1	0.158573	0.234568	0.0304791	1	0.154174	0.288136	0.0355938
gchfr	0.122541	1	1.27478	0.754717	0.23543	1.52739e-15	3.00605	1	0.254039	3.56998e-25	3.32455	0.961538	0.118657	0.414911	1.22262	0.644444	0.0817819	1	0.757894	0.416667	0.0375242	0.718757	0.285872	0.160494	0.0433103	1	0.341224	0.133333	0.0286925	0.0133488	0.205831	0.0576923	0.00392976	9.85598e-05	0.0196884	0.0222222	0.00574972	1.14253e-08	0.0305599	0.0422535	0.0198817	0.00627845	0.132066	0.17284	0.0201276	1	0.134032	0.271186	0.0736353
zgc:66440	0.104856	1	0.478245	0.45283	0.23198	1.9592e-05	1.35289	0.810811	0.162862	0.0279082	0.848217	0.75	0.110367	1	0.510915	0.4	0.0665834	1	0.268027	0.166667	0.0390553	0.000486049	0.137822	0.0864198	0.0183644	0.0153997	0.0551015	0.0444444	0.0666722	1	0.268478	0.115385	0.0731658	1	0.301956	0.2	0.0748946	1	0.311029	0.239437	0.0856228	1	0.36879	0.444444	0.110264	1	0.510303	0.610169	0.120589
b2ml	0.131052	1	2.28553	0.90566	0.23182	5.94742e-14	4.83905	0.972973	0.197412	5.1191e-12	3.91258	0.961538	0.0849726	1	1.30751	0.633333	0.0363139	1	0.451137	0.291667	0.0635335	0.659477	0.904495	0.37037	0.081876	1	1.24707	0.422222	0.124192	1	2.1312	0.615385	0.103128	1	1.67588	0.644444	0.0903161	1	1.41348	0.71831	0.0663435	1	0.955194	0.802469	0.0486592	1	0.647809	0.644068	0.039478
si:dkey-12e7.4	0.198277	7.24355e-08	1.77019	0.849057	0.231558	1.01374e-11	2.17349	0.945946	0.187567	1.78113e-07	1.64508	0.884615	0.100353	1	0.727865	0.477778	0.0687928	1	0.449797	0.25	0.0630765	1	0.403189	0.17284	0.0413917	0.273926	0.238451	0.0888889	0.0189801	9.47468e-05	0.0923166	0.0576923	0.0379693	1	0.214373	0.177778	0.0347066	0.293921	0.191962	0.197183	0.0507328	1	0.306947	0.382716	0.0876565	1	0.611983	0.728814	0.0761066
si:dkey-11c5.11	0.214721	1.15569e-05	1.26465	0.716981	0.230322	1.7367e-06	1.38766	0.864865	0.121124	1	0.596731	0.538462	0.0266952	0.00275703	0.0895983	0.0888889	0.0176978	1	0.0545843	0.0416667	0.0448802	0.287899	0.169471	0.0864198	0.0598792	1	0.242836	0.111111	0.118077	1	0.577341	0.25	0.149908	1	0.787866	0.488889	0.113215	1	0.546755	0.408451	0.0736662	1	0.315381	0.37037	0.0494956	1	0.191386	0.322034	0.05342
znf576.1	0.0905341	1	0.842542	0.641509	0.225857	3.27814e-10	2.77804	0.945946	0.234267	1.18546e-19	2.9158	0.980769	0.156404	0.000176126	1.7112	0.722222	0.13709	1	1.44025	0.708333	0.0607905	1	0.508467	0.234568	0.0413044	0.0514813	0.31418	0.0888889	0.0164779	6.63629e-07	0.102964	0.0384615	0.0151096	0.000306098	0.0928485	0.0666667	0.0228814	8.76291e-06	0.15273	0.126761	0.0489599	1	0.387916	0.407407	0.0537112	1	0.435405	0.508475	0.0944573
eef2l2	0.161053	1.06059e-05	1.86163	0.924528	0.225044	6.75131e-11	2.89446	1	0.169114	1.97736e-05	1.98499	0.884615	0.154037	0.465622	1.75598	0.677778	0.109798	1	1.13033	0.583333	0.096759	1	0.96053	0.382716	0.0833448	1	0.793586	0.266667	0.0850472	1	0.814319	0.365385	0.0373868	1	0.290884	0.2	0.0219084	3.45005e-06	0.151723	0.140845	0.0315002	0.0528472	0.235767	0.283951	0.0547028	1	0.466364	0.559322	0.0400292
sqstm1	0.122739	1	1.01638	0.735849	0.215704	1.89502e-08	2.13013	0.864865	0.216921	9.68208e-14	2.14604	0.884615	0.0829363	1	0.613867	0.344444	0.0623858	1	0.428062	0.25	0.0328636	0.00409375	0.193282	0.111111	0.0448551	1	0.283534	0.111111	0.0807849	1	0.593656	0.230769	0.030854	1	0.178931	0.133333	0.0440361	1	0.277133	0.253521	0.0355989	1	0.213187	0.296296	0.0415338	1	0.257782	0.355932	0.0896833
nbeaa	0.142409	1	0.73201	0.641509	0.2127	0.000143231	1.24093	0.864865	0.133669	1	0.673955	0.730769	0.138491	1	0.705827	0.455556	0.0783019	1	0.3386	0.208333	0.117303	1	0.568776	0.246914	0.0586054	1	0.234858	0.133333	0.069847	1	0.292939	0.134615	0.0877604	1	0.39157	0.177778	0.0951215	1	0.434106	0.28169	0.0620913	1	0.252534	0.320988	0.0695728	1	0.291486	0.423729	0.06317
si:dkey-10p5.10	0.107695	1	0.638532	0.54717	0.211659	1.3868e-07	1.54579	0.864865	0.26874	2.3775e-24	2.12024	0.961538	0.127063	1	0.791054	0.466667	0.0651201	1	0.336189	0.25	0.0548418	1	0.270972	0.148148	0.0116551	0.0303594	0.0413749	0.0222222	0	6.16941e-06	0	0	0.0277869	1	0.117189	0.0666667	0.0177767	0.00110198	0.0683616	0.056338	0.0116361	4.92073e-05	0.041295	0.0740741	0.0562422	1	0.279658	0.338983	0.0792638
pex26	0.095091	1	0.5972	0.566038	0.210855	1.52709e-06	1.68828	0.891892	0.142125	0.101584	1.00482	0.826923	0.0799243	1	0.478317	0.388889	0.0553197	1	0.300689	0.166667	0.0437849	7.45505e-05	0.224756	0.123457	0.0279766	0.00286216	0.129707	0.0666667	0.0640459	1	0.361378	0.173077	0.0697228	1	0.402255	0.311111	0.0983886	1	0.623918	0.450704	0.0872552	1	0.534944	0.604938	0.0902338	1	0.558403	0.627119	0.10937
psmb8a	0.169642	5.31316e-09	4.62377	0.962264	0.210854	6.55271e-12	6.16022	1	0.173373	6.87122e-10	4.75799	0.980769	0.0601155	1	1.21767	0.555556	0.0329023	1	0.576859	0.291667	0.0881844	1	1.97852	0.62963	0.136665	1	3.48366	0.666667	0.161862	0.00222732	4.34713	0.903846	0.0968914	1	2.23217	0.844444	0.0410627	1	0.757506	0.478873	0.0364718	1	0.654548	0.641975	0.0211139	0.00127981	0.336645	0.457627	0.032312
hsbp1l1	0.134013	1	0.589931	0.584906	0.210275	9.39429e-07	1.06628	0.810811	0.163056	0.000137941	0.762523	0.711538	0.0989027	1	0.39815	0.3	0.0379823	1	0.119531	0.0833333	0.0603772	1	0.212693	0.111111	0.0881415	1	0.343501	0.133333	0.0504793	1	0.170012	0.0961538	0.0396104	1	0.125876	0.111111	0.0182131	0.542143	0.0489692	0.0422535	0.00634982	0.000550905	0.0141273	0.0246914	0.0111611	1	0.0273533	0.0508475	0.0549523
dnai2a	0.0989681	1	0.403999	0.433962	0.206355	3.25461e-05	1.05446	0.810811	0.128227	1	0.564693	0.653846	0.0442321	1	0.14627	0.133333	0	1	0	0	0.0436469	1	0.143876	0.0740741	0.134338	1	0.599978	0.222222	0.151971	1	0.704881	0.326923	0.11431	1	0.486505	0.333333	0.0408115	1	0.132409	0.126761	0.0382294	1	0.122155	0.148148	0.0468548	1	0.157104	0.288136	0.0957972
eef1a1l2	0.119259	1	1.06881	0.773585	0.205741	3.89769e-09	2.1842	1	0.147607	0.00933577	1.41098	0.884615	0.0994951	1	0.845895	0.533333	0.0879434	1	0.722129	0.416667	0.077327	1	0.612947	0.234568	0.0523122	1	0.374741	0.177778	0.0917861	1	0.762741	0.326923	0.153227	1	1.48173	0.555556	0.134325	1	1.24753	0.56338	0.0729005	1	0.568781	0.567901	0.0428236	1	0.292229	0.338983	0.0119032
fuom	0.149801	0.0033233	1.28654	0.773585	0.20487	1.27993e-08	1.94255	0.918919	0.167375	2.80115e-08	1.48806	0.884615	0.119446	1	0.957843	0.577778	0.0612692	1	0.408515	0.291667	0.0637471	1	0.429405	0.185185	0.0296553	1	0.166437	0.0888889	0.0097844	9.84729e-06	0.0441668	0.0192308	0.0163563	0.0100269	0.0811913	0.0444444	0.0228231	0.00939114	0.12113	0.126761	0.030381	1	0.171419	0.234568	0.0356971	1	0.20883	0.322034	0.100785
nsfa	0.0920616	1	0.43035	0.433962	0.20371	0.00278041	1.21164	0.810811	0.13171	1	0.68345	0.634615	0.0977948	1	0.465023	0.3	0.0249883	1	0.0849432	0.0416667	0.0902747	1	0.419685	0.197531	0.0759489	1	0.336731	0.155556	0.0995009	1	0.475473	0.192308	0.140012	1	0.740146	0.422222	0.0823386	1	0.373161	0.239437	0.0702677	1	0.305142	0.333333	0.0945266	1	0.445173	0.508475	0.100907
sipa1l2	0.1586	0.0563006	1.3552	0.792453	0.203166	0.000219909	1.8779	0.837838	0.12585	1	1.00191	0.788462	0.0723554	1	0.492525	0.344444	0.0122284	0.693838	0.0561616	0.0416667	0.073745	1	0.504539	0.222222	0.109903	1	0.840619	0.311111	0.155228	1	1.31754	0.480769	0.0921424	1	0.670106	0.422222	0.0762135	1	0.526059	0.380282	0.0603686	1	0.391944	0.395062	0.0717151	1	0.487012	0.59322	0.0665676
egln3	0.141304	1	0.951026	0.660377	0.201208	0.0015522	1.51337	0.837838	0.142138	1	0.958359	0.634615	0.0745568	1	0.417594	0.3	0.0890679	1	0.523735	0.291667	0.0523941	0.0206225	0.267929	0.123457	0.0224913	0.00426578	0.0949514	0.0444444	0.0496862	1	0.250778	0.134615	0.105717	1	0.652631	0.4	0.102615	1	0.628072	0.408451	0.0833251	1	0.481009	0.54321	0.0701547	1	0.386618	0.457627	0.0950882
zgc:66024	0.120158	1	0.606135	0.566038	0.200451	3.82324e-09	1.18518	0.918919	0.138307	0.231412	0.727839	0.653846	0.0747444	1	0.329714	0.222222	0.0488703	1	0.193347	0.125	0.0656877	1	0.280028	0.148148	0.0641407	1	0.271744	0.111111	0.0453614	1	0.176254	0.0769231	0.0386642	1	0.144669	0.111111	0.0344262	1	0.125429	0.140845	0.0185195	0.206864	0.0591541	0.0864198	0.019199	1	0.0617674	0.118644	0.0851872
CABZ01118738.1	0.155087	1	0.627759	0.528302	0.164805	1	0.679875	0.567568	0.290367	3.05952e-15	1.43669	0.826923	0.0702764	1	0.226437	0.188889	0.107693	1	0.390623	0.208333	0.0418645	0.570821	0.118498	0.0617284	0.0229093	1	0.0567376	0.0222222	0.0738315	1	0.241037	0.134615	0.0219569	1	0.0539032	0.0444444	0.0525068	1	0.157	0.112676	0.0742003	1	0.242565	0.358025	0.0941351	1	0.328545	0.440678	0.0789922
ccnb3	0.0595722	1	0.658109	0.584906	0.12216	1	1.64575	0.891892	0.285587	1.11817e-14	5.03065	0.961538	0.215303	7.3515e-08	3.46188	0.766667	0.0888835	1	1.09256	0.583333	0.140656	1	1.97728	0.592593	0.0269997	0.000248007	0.247783	0.111111	0.00497753	3.24871e-13	0.0335187	0.0192308	0.0223909	0.000618996	0.197533	0.133333	0.0446236	1	0.458981	0.366197	0.0516914	1	0.551047	0.617284	0.0503024	1	0.53265	0.59322	0.0570504
selenow2a	0.0685148	1	1.27003	0.773585	0.172417	0.00330809	4.17846	0.972973	0.244262	9.21265e-24	6.62044	0.980769	0.179643	1.60341e-12	4.41056	0.911111	0.114909	1	2.46012	0.625	0.0778638	1	1.49348	0.493827	0.0342233	0.000386839	0.535509	0.244444	0.0195014	5.26912e-11	0.270662	0.153846	0.0359969	0.0399237	0.569768	0.333333	0.041453	0.110231	0.677975	0.464789	0.0744383	1	1.41057	0.876543	0.073645	1	1.39154	0.881356	0.0717029
ak1	0.111993	1	1.15625	0.679245	0.145618	1	1.62669	0.864865	0.234336	5.32345e-06	3.04486	0.846154	0.196139	7.76273e-11	2.40633	0.822222	0.0729745	1	0.668335	0.375	0.252315	9.11501e-14	3.3579	0.777778	0.0449439	1	0.364091	0.133333	0.0500408	1	0.416088	0.230769	0.0349689	1	0.267166	0.177778	0.0147531	1.37213e-06	0.094204	0.0985915	0.0224898	0.0104975	0.15614	0.234568	0.0245988	0.599345	0.174011	0.220339	0.0219435
fads2	0.269594	1.02567e-10	1.50255	0.792453	0.115742	1	0.494597	0.459459	0.228218	3.29088e-11	1.20521	0.865385	0.176685	0.00143628	0.859476	0.544444	0.106288	1	0.443036	0.291667	0.141758	1	0.643821	0.246914	0.0357084	1	0.112368	0.0666667	0.0266595	1	0.0786411	0.0384615	0.0448257	1	0.148763	0.0666667	0.0219377	1	0.0621148	0.0704225	0.0161284	0.06258	0.0429452	0.0740741	0.00406906	0.00442633	0.00856198	0.0169492	0.016301
sprtn	0.0610714	1	0.409322	0.45283	0.196637	2.01104e-05	1.85121	0.918919	0.226694	4.33007e-20	2.23435	0.980769	0.152572	0.0243009	1.32578	0.666667	0.128478	1	1.05932	0.416667	0.0882286	1	0.652454	0.296296	0.0749293	1	0.529902	0.222222	0.0397066	0.23988	0.239505	0.115385	0.0574766	1	0.379317	0.222222	0.0667049	1	0.457421	0.338028	0.0459427	1	0.286878	0.320988	0.0427482	1	0.26237	0.423729	0.0428826
aldob	0.199307	2.68197e-11	1.66517	0.924528	0.197245	0.000374015	1.64245	0.864865	0.222705	5.83854e-10	1.92846	0.865385	0.171446	0.000474208	1.36531	0.633333	0.117167	1	0.830496	0.375	0.0880482	1	0.575012	0.271605	0.048732	1	0.272751	0.133333	0.0274182	0.158036	0.134482	0.0576923	0.0303843	1	0.152406	0.0666667	0.0197297	0.00188157	0.090353	0.084507	0.0155053	0.000177881	0.0677183	0.0987654	0.0251892	1	0.121329	0.169492	0.0363878
anxa11a	0.0731349	1	0.787121	0.603774	0.149265	0.0037142	1.97333	0.972973	0.222234	4.68211e-21	3.33366	1	0.16161	3.75491e-07	2.18998	0.788889	0.0699589	1	0.744107	0.5	0.0664233	1	0.696932	0.358025	0.0102807	3.1679e-07	0.0721444	0.0444444	0.0332303	0.000670362	0.29476	0.115385	0.0165	9.80365e-06	0.126433	0.0666667	0.0260118	3.58924e-05	0.218685	0.183099	0.0328037	1	0.290134	0.395062	0.063161	1	0.654082	0.694915	0.133539
si:dkey-188i13.10	0.108677	1	0.747516	0.641509	0.178406	0.0570018	1.42725	0.837838	0.222117	4.49295e-13	1.90637	0.923077	0.148774	1	1.12439	0.6	0.137893	1	1.01816	0.5	0.11141	1	0.771881	0.345679	0.130711	1	0.94961	0.266667	0.0635868	1	0.377481	0.211538	0.0398071	1	0.210596	0.155556	0.0309268	0.184928	0.154491	0.15493	0.0291867	0.399418	0.143954	0.209877	0.0427912	1	0.230269	0.288136	0.0476259
hagh	0.194806	2.11688e-07	1.45396	0.830189	0.172084	0.056999	1.23467	0.810811	0.219607	1.98512e-10	1.70355	0.865385	0.106813	1	0.663134	0.466667	0.0810605	1	0.465654	0.25	0.0290457	1.34081e-06	0.129819	0.0617284	0.0366321	0.0572174	0.172454	0.0444444	0.0306418	0.0149912	0.138571	0.0576923	0.0321864	1	0.147153	0.111111	0.0335529	0.183248	0.154837	0.140845	0.0249286	0.000977698	0.107817	0.135802	0.125047	1	0.813211	0.779661	0.1289
gpx1b	0.168177	1.82402e-06	1.70285	0.867925	0.143864	0.130086	1.38764	0.864865	0.217059	1.73803e-16	2.38446	0.961538	0.165598	4.59733e-06	1.66861	0.677778	0.126387	1	1.1721	0.666667	0.0890162	1	0.74591	0.296296	0.0346407	1	0.228879	0.111111	0.0271007	0.382967	0.169611	0.0961538	0.0188406	0.435696	0.109355	0.0888889	0.00453583	1.84777e-10	0.0205154	0.0140845	0.0143598	3.42247e-06	0.0790598	0.0987654	0.0154812	0.0721804	0.0864651	0.152542	0.0510445
ENSDARG00000040725	0.128532	1	0.909868	0.641509	0.139065	0.181112	1.00821	0.891892	0.215856	5.46253e-12	1.79768	0.884615	0.0994174	1	0.652733	0.444444	0.0777107	1	0.476441	0.25	0.0238881	4.35934e-07	0.110543	0.0740741	0	2.07992e-07	0	0	0	2.80191e-09	0	0	0.0386846	1	0.1991	0.111111	0.0640659	1	0.373194	0.309859	0.0824231	1	0.513502	0.518519	0.0735835	1	0.444562	0.508475	0.0992774
CABZ01058261.1	0.164752	1	3.65024	0.886792	0.0866725	1	1.5877	0.891892	0.21441	2.58425e-09	5.16686	0.942308	0.135215	1	2.81851	0.722222	0.149702	1	3.2193	0.833333	0.108515	1	2.11881	0.481481	0.0368946	0.00745697	0.544653	0.222222	0.0477202	1	0.748626	0.326923	0.0311463	0.0655904	0.442554	0.288889	0.036343	0.1597	0.534659	0.422535	0.0500966	1	0.795294	0.62963	0.0675606	1	1.15717	0.79661	0.0847589
acsbg2	0.0941305	1	1.11077	0.716981	0.106026	1	1.29441	0.810811	0.212272	2.13969e-12	3.20959	0.961538	0.176138	3.18465e-07	2.50884	0.811111	0.150857	1	2.04698	0.708333	0.150836	1	2.0466	0.604938	0.0977887	1	1.16647	0.444444	0.0558099	1	0.572887	0.230769	0.0442646	0.268445	0.429269	0.2	0.0497248	1	0.495996	0.380282	0.0458189	1	0.448037	0.481481	0.0407286	1	0.387265	0.457627	0.0506315
fthl28	0.143771	4.33053e-05	2.4427	0.886792	0.13916	0.0426024	2.34091	0.945946	0.211161	2.73147e-14	4.05068	0.942308	0.0756193	1	1.06761	0.577778	0.043068	1	0.527333	0.208333	0.0575668	1	0.75687	0.382716	0.0581116	1	0.765861	0.288889	0.0501047	1	0.636338	0.269231	0.0649005	1	0.879964	0.422222	0.0385189	1	0.459433	0.28169	0.0374253	1	0.443427	0.481481	0.0234477	1	0.250731	0.423729	0.0568129
lrwd1	0.166034	0.0104704	2.07867	0.849057	0.151903	0.157486	1.8497	0.918919	0.210421	2.45998e-10	2.84106	0.923077	0.141617	1	1.68762	0.722222	0.0314334	1	0.252275	0.125	0.0759375	1	0.756302	0.308642	0.0471181	0.0352702	0.415387	0.155556	0.014384	3.31347e-10	0.0983462	0.0576923	0.017894	8.89183e-07	0.127624	0.0888889	0.056095	1	0.516299	0.422535	0.078853	1	0.79338	0.691358	0.0823893	1	0.838942	0.762712	0.106015
cdt1	0.161841	0.00054822	1.51283	0.867925	0.0895076	1	0.701898	0.594595	0.207945	3.04689e-13	2.10513	0.961538	0.162994	2.76037e-05	1.52701	0.744444	0.086084	1	0.667773	0.375	0.12025	1	1.02666	0.407407	0.0812781	1	0.620609	0.244444	0.0585071	1	0.409647	0.192308	0.0339053	0.474379	0.208309	0.133333	0.0482651	1	0.322133	0.295775	0.0361758	1	0.225556	0.320988	0.0418742	1	0.270116	0.372881	0.0426685
prkab1a	0.131657	1	0.901804	0.698113	0.169537	0.265578	1.25559	0.810811	0.207281	1.33814e-11	1.63676	0.942308	0.177498	2.5269e-05	1.33374	0.688889	0.137695	1	0.956075	0.583333	0.150879	1	1.07744	0.382716	0.0125902	7.80014e-05	0.0493437	0.0222222	0.0262668	0.00938045	0.119136	0.0769231	0.0240008	0.138148	0.106798	0.0888889	0.0402707	1	0.200978	0.183099	0.0377518	1	0.185598	0.259259	0.0422686	1	0.213367	0.372881	0.0755133
atox1	0.112995	1	3.25287	0.943396	0.197147	2.72495e-11	6.7377	0.972973	0.204473	8.26628e-27	7.07047	1	0.118143	1	3.44598	0.9	0.0602497	1	1.45963	0.625	0.0767627	1	1.98193	0.592593	0.0404839	1.96204e-06	0.88976	0.288889	0.0550121	1	1.30239	0.538462	0.0485264	1	1.11375	0.577778	0.0447061	0.0676048	1.00593	0.591549	0.0634414	1	1.55751	0.876543	0.0882123	1	2.366	0.932203	0.111525
slc25a55a	0.119561	1	0.789212	0.698113	0.152253	1	1.08146	0.783784	0.201352	2.48053e-09	1.56237	0.903846	0.147274	1	1.0354	0.522222	0.133066	1	0.906974	0.5	0.097557	1	0.607029	0.283951	0.0968498	1	0.601384	0.222222	0.0612999	1	0.336385	0.173077	0.0522698	1	0.275526	0.2	0.054622	1	0.2911	0.225352	0.0607475	1	0.33258	0.407407	0.066843	1	0.375131	0.525424	0.0642516
eci2	0.105926	1	0.696787	0.622642	0.158658	1	1.17861	0.783784	0.200058	4.31765e-11	1.59949	0.942308	0.115372	1	0.778076	0.477778	0.0859762	1	0.533128	0.291667	0.0727937	1	0.431425	0.209877	0.0707684	1	0.416285	0.2	0.0581328	1	0.324946	0.134615	0.0552417	1	0.304835	0.244444	0.0584702	1	0.327313	0.267606	0.0699922	1	0.410519	0.45679	0.0761445	1	0.456762	0.576271	0.094619
zgc:194189	0.0126631	1	0.111653	0.113208	0.0272013	1	0.27935	0.135135	0.0368074	1	0.404302	0.153846	0.2417	3.77222e-27	4.50761	0.9	0.225028	0.000163324	4.10067	1	0.339157	6.50924e-42	7.0444	0.950617	0.162768	1	2.67461	0.644444	0.0441133	1	0.505543	0.153846	0.00363252	0.00997518	0.0260485	0.0222222	0.00126153	4.72566e-08	0.00782464	0.0140845	0.00412276	2.77157e-07	0.0301311	0.0493827	0.00521968	0.00520978	0.039565	0.0847458	0.00593685
pwp1	0.105138	1	1.64115	0.867925	0.123806	1	2.02757	0.972973	0.132561	0.0319686	2.21598	0.980769	0.219693	2.80491e-31	4.30503	0.955556	0.196666	1	3.71875	0.875	0.0611135	0.00301462	0.822807	0.308642	0.0127028	7.34286e-11	0.12145	0.0666667	0.00455073	8.66306e-18	0.0365913	0.0192308	0.0449809	1	0.561248	0.311111	0.0714647	1	1.00231	0.535211	0.0726024	1	1.02255	0.716049	0.0572483	1	0.758041	0.694915	0.078024
si:ch211-288g17.3	0.0800414	1	5.1527	0.962264	0.0978258	1	6.65942	1	0.195046	3.57719e-16	16.3765	1	0.218237	1.009e-46	18.9987	0.988889	0.167072	0.248761	13.3547	1	0.119668	1	8.63755	0.876543	0.0426001	0.00381276	2.336	0.622222	0.0217212	2.37987e-17	1.02652	0.403846	0.0270521	3.77923e-09	1.33884	0.533333	0.0479083	1	2.70222	0.887324	0.0711045	1	4.43395	0.987654	0.0788833	1	5.05806	1	0.0748812
dek	0.0428336	1	1.86489	0.867925	0.054678	1	2.52658	0.972973	0.12297	1	7.09528	1	0.21204	9.4639e-32	14.5016	0.988889	0.228879	1.58027e-07	16.0448	1	0.170255	4.58071e-09	10.8556	0.962963	0.0939363	1	5.01267	0.866667	0.0388536	7.78415e-11	1.65331	0.461538	0.0254908	4.4489e-11	0.987725	0.466667	0.0527084	1	2.41339	0.887324	0.0770644	1	3.89361	0.987654	0.0886508	1	4.65446	0.983051	0.0692093
si:ch73-308l14.2	0.113721	1	1.58276	0.830189	0.0974932	1	1.29787	0.837838	0.100264	1	1.34546	0.903846	0.209746	2.73212e-18	3.52874	0.922222	0.209048	0.0890324	3.51322	0.916667	0.078617	0.376894	0.985851	0.333333	0.0299784	8.20666e-07	0.296983	0.133333	0.0194795	1.0257e-12	0.176254	0.0769231	0.0272105	1.67217e-06	0.26394	0.155556	0.112148	1	1.55451	0.690141	0.113171	1	1.57286	0.839506	0.0782315	1	0.979711	0.779661	0.0863864
mych	0.091648	1	1.11853	0.754717	0.0864046	1	1.03736	0.891892	0.111073	1	1.4323	0.865385	0.202429	5.1383e-11	3.1411	0.888889	0.153943	1	2.19043	0.708333	0.0475169	4.68615e-10	0.488468	0.234568	0.0358993	1.58985e-06	0.34546	0.155556	0.0284044	2.51679e-11	0.259441	0.115385	0.0753232	1	0.87107	0.422222	0.119076	1	1.56725	0.746479	0.118375	1	1.55531	0.91358	0.118215	1	1.55258	0.949153	0.105803
mcm3	0.0751073	1	4.17	0.90566	0.0872966	1	5.04998	0.972973	0.145327	0.000121567	9.76004	1	0.201889	8.58085e-39	15.0389	1	0.205609	6.31313e-05	15.4062	1	0.1458	1.38481e-08	9.80158	1	0.141007	1	9.38268	0.955556	0.086511	1	4.992	0.846154	0.0230039	6.90505e-13	0.965266	0.466667	0.0358189	3.38249e-07	1.65526	0.704225	0.0601623	1	3.15149	0.975309	0.0380079	1	1.78052	0.864407	0.0291822
zgc:153405	0.0134615	1	0.153544	0.188679	0.0133922	1	0.152606	0.135135	0.0891644	1	1.56755	0.653846	0.0744683	1	1.24626	0.466667	0.391276	9.21052e-17	10.8399	0.958333	0.0177627	6.03187e-07	0.213689	0.0493827	0.314659	5.98812e-23	8.16739	0.888889	0.0465281	1	0.690773	0.307692	0.0161629	1	0.190886	0.111111	0.0270687	1	0.355173	0.225352	0.0285978	1	0.379726	0.382716	0.036714	1	0.515488	0.525424	0.0339082
si:ch211-113a14.24	0.00663074	0.342998	0.103596	0.132075	0.0109837	1	0.187157	0.216216	0.051225	1	1.20733	0.5	0.0614491	1	1.51623	0.444444	0.391015	6.38534e-15	16.7948	0.958333	0.0162567	0.125006	0.298057	0.135802	0.367642	1.39411e-36	15.5144	0.977778	0.047543	1	1.10027	0.288462	0.00700281	0.591251	0.1104	0.0888889	0.010925	0.344067	0.185977	0.15493	0.0198091	1	0.377668	0.395062	0.0342293	1	0.733457	0.559322	0.0298227
zgc:173552.7	0.00262606	0.0228661	0.0108679	0.0188679	0.00451127	1	0.0202195	0.027027	0.0458367	1	0.320674	0.288462	0.0452542	1	0.315627	0.2	0.371445	1.03323e-10	4.79497	0.875	0.0222907	1	0.132774	0.0740741	0.347308	4.58696e-21	4.39497	0.8	0.0305216	1	0.19442	0.0769231	0.0191222	1	0.110403	0.0444444	0.0330461	1	0.214256	0.140845	0.0510761	1	0.366883	0.45679	0.0507702	1	0.364145	0.474576	0.0442177
hist1h2a1	0.00882401	1	0.0273582	0.0188679	0.00802398	1	0.0244759	0.0540541	0.043548	1	0.186614	0.115385	0.0349432	1	0.142266	0.0777778	0.364197	6.83542e-10	2.89853	0.833333	0.0142537	1	0.0481937	0.0246914	0.379023	8.23993e-16	3.0517	0.644444	0.0707605	1	0.342584	0.115385	0.00828781	1	0.0254204	0.0222222	0.0231317	1	0.0860969	0.0704225	0.0403935	1	0.170048	0.246914	0.0587968	1	0.271291	0.40678	0.0312303
si:dkey-261m9.12	0.00924434	1	0.0965667	0.113208	0.0112862	1	0.122147	0.189189	0.0888024	1	1.5284	0.519231	0.0715996	1	1.16217	0.466667	0.360314	5.52204e-13	9.5537	0.958333	0.0251818	0.246958	0.318886	0.0987654	0.361871	1.89925e-34	9.60722	0.977778	0.0570086	1	0.872251	0.365385	0.0106569	1	0.114153	0.0888889	0.0111731	0.156268	0.120704	0.112676	0.0226076	1	0.27989	0.259259	0.0293046	1	0.383408	0.423729	0.0255296
hist1h4l.16	0.020334	1	1.11358	0.716981	0.0229822	1	1.29066	0.837838	0.0705956	1	5.16075	0.923077	0.0670133	1	4.83211	0.866667	0.355335	2.80925e-15	42.4167	0.958333	0.0384522	0.67895	2.41782	0.555556	0.330893	6.43661e-37	38.6543	1	0.0635355	1	4.5182	0.807692	0.0282237	1	1.65573	0.622222	0.0343467	1	2.10453	0.647887	0.0440709	1	2.86148	0.888889	0.0456967	1	2.99292	0.932203	0.0266475
si:ch211-113a14.18	0.00157985	4.81461e-06	0.0212995	0.0377358	0.00624058	1	0.102778	0.108108	0.0399201	1	0.943445	0.480769	0.0622992	1	1.64234	0.411111	0.354523	2.45048e-12	15.7574	0.958333	0.0227499	0.0203327	0.475028	0.123457	0.399612	9.73063e-38	18.3838	0.977778	0.0568922	1	1.46545	0.365385	0.0110568	1	0.200816	0.155556	0.0123649	1	0.229192	0.197183	0.0293775	1	0.647766	0.493827	0.0320012	1	0.719077	0.576271	0.0334554
hist1h2a11.2	0.0280502	1	0.104484	0.150943	0.0173613	1	0.0585735	0.108108	0.0622201	1	0.279803	0.307692	0.0692585	1	0.320281	0.2	0.335065	7.29932e-10	2.49822	0.875	0.0173003	0.000109756	0.0583273	0.037037	0.245502	0.937545	1.65803	0.466667	0.0484635	1	0.204706	0.0961538	0.0535964	1	0.232077	0.2	0.109942	1	0.578014	0.450704	0.0850466	1	0.415709	0.555556	0.0714456	1	0.333127	0.491525	0.0525274
si:ch73-36p18.1	0.0165513	1	0.12396	0.150943	0.0135814	1	0.0979479	0.189189	0.0423393	1	0.387931	0.288462	0.0635218	1	0.643514	0.322222	0.330606	6.17504e-12	5.50068	0.958333	0.0333299	1	0.288984	0.135802	0.351308	1.00663e-28	5.95413	0.911111	0.0897774	1	0.998204	0.365385	0.0136422	1	0.0984689	0.0888889	0.0364284	1	0.322286	0.211268	0.0316636	1	0.271406	0.358025	0.043706	1	0.403487	0.525424	0.040349
si:ch211-113a14.12	0.0125967	1	0.261165	0.245283	0.0108784	1	0.219595	0.297297	0.0559529	1	1.59984	0.576923	0.0649367	1	1.92882	0.444444	0.330086	8.04682e-12	16.0032	0.958333	0.0321863	1	0.807228	0.17284	0.404888	9.7394e-41	20.8375	1	0.0589824	1	1.70912	0.365385	0.010865	0.410842	0.219277	0.111111	0.004106	4.09316e-08	0.0705866	0.0704225	0.0197481	1	0.446531	0.395062	0.0324977	1	0.816794	0.644068	0.0309748
zgc:153409	0.0842294	1	7.1307	1	0.0761471	1	6.27171	1	0.111821	0.845193	10.2598	1	0.066965	1	5.33033	0.877778	0.327026	2.6444e-19	42.0271	1	0.0390814	0.688901	2.72347	0.679012	0.183531	3.98602e-07	19.599	0.955556	0.0249621	5.84977e-07	1.57486	0.461538	0.00586754	4.73201e-20	0.283516	0.177778	0.0319641	6.66478e-07	2.12783	0.577465	0.0839273	1	7.0981	0.987654	0.106205	0.233131	9.5995	0.966102	0.0888117
hist1h4l.23	0.00926842	1	0.0279308	0.0377358	0.0282581	1	0.105769	0.189189	0.0393165	1	0.158505	0.230769	0.046912	1	0.197229	0.155556	0.324112	9.62801e-09	2.39966	0.833333	0.00394674	0.0116733	0.010358	0.0123457	0.41066	5.28917e-20	3.25823	0.688889	0.0553164	1	0.242207	0.0961538	0	1	0	0	0.0267904	1	0.099127	0.084507	0.0316751	1	0.121569	0.185185	0.0280077	1	0.104629	0.20339	0.0509039
FQ312024.1	0.00994872	0.005043	0.0573111	0.0566038	0.00222867	0.0135761	0.0101706	0.027027	0.0423117	1	0.327651	0.25	0.0558865	1	0.463186	0.3	0.318169	6.00407e-08	4.42189	0.875	0.0157697	1.26306e-06	0.0989038	0.0493827	0.327277	1.61455e-14	4.58852	0.777778	0.0679374	1	0.592057	0.211538	0.045795	1	0.361387	0.244444	0.0608706	1	0.515561	0.366197	0.0749717	1	0.670686	0.691358	0.0836714	1	0.771184	0.677966	0.0480063
si:ch211-113a14.19.4	0.0112242	1	0.0420876	0.0377358	0.0278048	1	0.124731	0.162162	0.0332919	1	0.155397	0.211538	0.0484842	1	0.247133	0.188889	0.314605	5.89904e-08	2.77559	0.833333	0.02286	1	0.0983795	0.0617284	0.36216	1.23182e-17	3.33535	0.733333	0.053736	1	0.28094	0.134615	0.015446	1	0.0614669	0.0444444	0.0240662	1	0.104689	0.084507	0.0600807	1	0.323091	0.395062	0.0788651	1	0.455631	0.644068	0.0415246
si:dkey-108k21.10	0.010195	0.00012352	0.272531	0.320755	0.0136635	1	0.385294	0.405405	0.0752687	1	3.11442	0.75	0.078506	1	3.28551	0.644444	0.310394	1.81592e-09	19.7778	0.916667	0.0292219	0.000170781	0.961101	0.296296	0.349012	1.22941e-38	23.0569	1	0.0522868	1	1.96923	0.461538	0.0134524	0.000586285	0.378235	0.222222	0.0333469	1	1.12936	0.549296	0.0524835	1	1.97848	0.864198	0.0646913	1	2.57172	0.915254	0.0509223
hist1h4l.11	0.0258146	1	2.5843	0.849057	0.0285593	1	2.92194	0.891892	0.0959182	1	13.2665	0.942308	0.0739075	1	9.51393	0.833333	0.304103	1.17453e-06	60.1892	0.875	0.0353351	1	3.79059	0.62963	0.378279	7.57091e-22	80.0027	0.888889	0.0531482	1	6.28334	0.807692	0.0138177	0.0078566	1.22071	0.533333	0.0259131	1	2.59627	0.802817	0.036288	1	3.91653	0.876543	0.0367887	1	3.98307	0.864407	0.0312007
zgc:173552	0.00484007	3.93554e-07	0.032403	0.0566038	0.0206959	1	0.179389	0.189189	0.0296142	1	0.276875	0.25	0.0567188	1	0.617914	0.333333	0.302526	2.0416e-08	5.41958	0.916667	0.0254225	1.60318e-05	0.229986	0.123457	0.27011	3.21599e-12	4.66678	0.822222	0.100228	1	1.27263	0.480769	0.0798986	1	0.952293	0.4	0.0971791	1	1.22309	0.535211	0.0999771	1	1.26853	0.765432	0.0772452	1	0.91227	0.762712	0.0390724
hist1h4l.10	0.026961	1	0.275783	0.301887	0.0276853	1	0.284814	0.432432	0.0585714	1	0.718322	0.5	0.0783768	1	1.03764	0.366667	0.300808	1.48028e-08	6.00629	0.916667	0.0311779	0.0110572	0.329195	0.185185	0.318561	1.02212e-22	6.47648	0.911111	0.0580952	1	0.711005	0.25	0.0335888	1	0.360601	0.2	0.0621686	1	0.774157	0.492958	0.0724163	1	0.938555	0.753086	0.0671248	1	0.852703	0.762712	0.0360582
rimkla	0.0672276	1	0.504356	0.490566	0.083414	1	0.663106	0.540541	0.0861503	1	0.690983	0.615385	0.137831	1	1.26742	0.644444	0.275194	0.000303291	3.15296	0.833333	0.0749731	1	0.578976	0.320988	0.0987951	1	0.823486	0.333333	0.053444	0.882454	0.37811	0.173077	0.0519252	1	0.364744	0.244444	0.0861829	1	0.691318	0.478873	0.100716	1	0.844132	0.728395	0.0689725	1	0.520944	0.610169	0.0730339
acsl3b	0.0687277	1	0.362864	0.433962	0.0844819	1	0.471555	0.405405	0.113909	1	0.692263	0.653846	0.185911	2.53052e-06	1.31327	0.677778	0.267932	0.000283086	2.12946	0.833333	0.0780577	1	0.426381	0.246914	0.0383783	1	0.175448	0.0888889	0.0214776	9.49131e-05	0.0865146	0.0384615	0.0387485	1	0.177535	0.133333	0.0872263	1	0.491198	0.323944	0.0681184	1	0.358806	0.345679	0.0762901	1	0.414155	0.508475	0.103204
FP236630.1	0.0206931	0.689543	0.142378	0.150943	0.019852	1	0.135448	0.243243	0.0617971	1	0.546236	0.384615	0.0605646	1	0.53258	0.311111	0.266953	4.31059e-05	3.64742	0.875	0.0260934	5.4389e-06	0.188426	0.0864198	0.305885	3.84716e-13	4.36512	0.777778	0.0701664	1	0.641114	0.307692	0.0443543	1	0.361088	0.244444	0.0630642	1	0.560361	0.380282	0.0992951	1	0.998152	0.691358	0.107267	1	1.10252	0.728814	0.0641912
si:dkey-23a13.17	0.0177644	0.000502559	0.177997	0.207547	0.0205871	1	0.212465	0.324324	0.0492037	1	0.616739	0.519231	0.0559364	1	0.723803	0.366667	0.266512	1.14734e-08	5.46465	0.958333	0.0134611	1.77617e-16	0.127878	0.0740741	0.253067	1.06061e-07	5.1029	0.777778	0.0988729	1	1.49054	0.5	0.0726227	1	1.00548	0.466667	0.089161	1	1.30551	0.661972	0.0956856	1	1.42913	0.839506	0.0928605	1	1.37525	0.864407	0.0840642
zgc:173552.3	0.00696241	2.4995e-11	0.13495	0.207547	0.00892	3.58432e-05	0.180303	0.243243	0.0323902	1	0.843596	0.596154	0.0463319	1	1.31134	0.522222	0.264819	5.03693e-08	12.4159	0.958333	0.0388695	0.000685704	1.0553	0.345679	0.304987	3.15807e-24	14.9596	0.955556	0.0837998	1	2.76354	0.634615	0.0967324	1	3.32058	0.8	0.0972078	1	3.34154	0.859155	0.095782	0.0439066	3.27876	0.950617	0.0833439	1	2.74438	0.864407	0.0437571
hist2h3c	0.00914337	3.97333e-06	0.0839038	0.113208	0.00638877	0.000521918	0.0551903	0.0810811	0.043799	1	0.552855	0.403846	0.0567342	1	0.763081	0.355556	0.264287	8.1735e-06	5.59752	0.875	0.0410336	0.0196916	0.51001	0.197531	0.319626	1.16341e-19	7.19183	0.888889	0.0747364	1	1.07998	0.288462	0.0689723	1	0.975637	0.555556	0.0761753	1	1.10644	0.549296	0.0956236	0.304561	1.47897	0.82716	0.0892746	1	1.35437	0.830508	0.047991
hist1h4l.6	0.0245811	0.00965139	2.8979	0.90566	0.0221999	0.805488	2.56211	0.945946	0.0585441	1	8.43838	0.942308	0.0514306	1	7.17623	0.9	0.259269	2.95081e-09	58.02	0.958333	0.0317098	4.03123e-10	3.95026	0.777778	0.30019	7.41286e-34	70.4083	1	0.0870743	1	13.9469	0.980769	0.0744646	1	11.4289	0.977778	0.0695877	1	10.4896	1	0.0911825	0.033929	14.7939	1	0.0945287	1	15.4931	0.983051	0.0645881
si:ch211-113a14.19.2	0.017045	0.0138055	0.165689	0.150943	0.0084507	0.0330544	0.0722394	0.108108	0.0587879	1	0.75343	0.461538	0.0605549	1	0.781966	0.3	0.259034	5.59668e-07	5.14726	0.916667	0.0242125	1.28831e-07	0.252731	0.0987654	0.327877	2.0068e-17	7.02196	0.866667	0.059019	1	0.757148	0.326923	0.048906	1	0.598669	0.355556	0.0713555	1	0.961745	0.507042	0.124246	3.2046e-06	1.95828	0.851852	0.0950731	1	1.3863	0.864407	0.0428147
lbr	0.0325252	0.000336077	0.75389	0.641509	0.035009	1	0.825034	0.702703	0.0873833	1	2.59203	0.903846	0.150937	0.00132503	5.25747	0.933333	0.259007	4.05678e-10	10.72	0.958333	0.118077	1	3.81825	0.691358	0.129269	1	4.29465	0.866667	0.0656315	1	1.80245	0.634615	0.0651222	1	1.78484	0.733333	0.091683	1	2.75628	0.887324	0.101617	1	3.1454	0.975309	0.0871192	1	2.58203	0.932203	0.058632
CU457819.1	0.0209044	0.367641	0.245619	0.320755	0.0231259	1	0.277435	0.378378	0.0504598	1	0.722297	0.538462	0.0359489	7.38755e-05	0.474829	0.255556	0.24801	5.91797e-06	5.6389	0.916667	0.0233048	1.34574e-09	0.280031	0.148148	0.287671	1.24692e-18	6.8608	0.911111	0.128106	1	2.3646	0.634615	0.0924095	1	1.55114	0.644444	0.0935134	1	1.57493	0.676056	0.0934295	1	1.57312	0.82716	0.0884029	1	1.46561	0.830508	0.0456452
hist1h2a6	0.0164752	0.000760438	0.267486	0.320755	0.0159557	0.532882	0.257447	0.351351	0.0409166	1	0.806898	0.461538	0.041959	0.264064	0.832373	0.422222	0.241204	6.3357e-07	7.87473	0.958333	0.0276244	5.14582e-14	0.49862	0.135802	0.307524	1.09003e-26	10.8541	0.977778	0.0817088	1	1.92053	0.519231	0.0926302	1	2.25435	0.777778	0.0968818	1	2.3879	0.774648	0.106199	0.00620625	2.68737	0.925926	0.0873281	1	2.09059	0.915254	0.0487911
si:ch73-368j24.11	0.00979933	1.07706e-05	0.0628005	0.0754717	0.0250489	1	0.19241	0.27027	0.0368502	1	0.308213	0.25	0.0540574	1	0.495603	0.277778	0.24111	1.53546e-05	3.42031	0.916667	0.0344041	0.00152391	0.283282	0.148148	0.291379	9.28503e-16	4.39343	0.844444	0.0987449	1	1.0634	0.442308	0.0919752	1	0.970791	0.422222	0.0789823	1	0.799315	0.521127	0.0890911	1	0.932005	0.679012	0.0841682	1	0.866743	0.745763	0.0573117
golga7ba	0.193366	1.20644e-09	2.43766	0.886792	0.191205	1.14642e-05	2.40176	0.945946	0.114148	1	1.22331	0.769231	0.158799	5.35507e-06	1.88096	0.733333	0.2408	0.000112268	3.25832	0.916667	0.0907608	1	0.910758	0.320988	0.0788193	1	0.760755	0.266667	0.0419515	1	0.345098	0.134615	0.0357488	1	0.283349	0.177778	0.0271751	0.0223984	0.202691	0.15493	0.0245435	0.0593649	0.179133	0.222222	0.0290537	1	0.219865	0.237288	0.0283788
e2f8	0.039132	1	0.491552	0.339623	0.0417801	1	0.532933	0.486486	0.117708	1	1.97574	0.730769	0.112256	1	1.85813	0.5	0.236673	0.00177554	4.94287	0.875	0.0535333	1	0.725173	0.345679	0.22671	4.49282e-08	4.66932	0.844444	0.085176	1	1.30341	0.519231	0.0345549	0.0566401	0.421836	0.2	0.0419176	1	0.535101	0.366197	0.0773173	1	1.15226	0.765432	0.0807616	1	1.21793	0.932203	0.0842263
fbxo5	0.022002	0.00153659	0.271927	0.301887	0.0188976	0.00173825	0.226459	0.189189	0.116475	1	2.17535	0.634615	0.114018	1	2.11612	0.6	0.230972	1.54922e-07	5.34174	0.958333	0.0566839	0.00121579	0.869416	0.259259	0.152293	1	3.08468	0.733333	0.0515523	1	0.772186	0.365385	0.0486096	1	0.717672	0.377778	0.0764752	1	1.26833	0.661972	0.0980017	0.428544	1.74099	0.938272	0.0945767	1	1.66328	0.915254	0.0836362
gbp	0.129249	1	1.03103	0.679245	0.106469	1	0.802057	0.675676	0.124962	1	0.986805	0.75	0.18482	3.83109e-06	1.64741	0.677778	0.226548	0.000424164	2.156	0.875	0.0454762	0.0333433	0.273568	0.160494	0.0409835	1	0.240519	0.111111	0.0309647	0.0224751	0.170466	0.0961538	0.0537887	1	0.337156	0.222222	0.0867321	1	0.616488	0.422535	0.0447089	1	0.267856	0.358025	0.0502781	1	0.309927	0.40678	0.0591331
CU459186.2	0.0196738	0.00807604	0.201841	0.264151	0.0142294	0.0486402	0.137042	0.216216	0.0528271	1	0.676066	0.5	0.0458828	0.0180194	0.567288	0.3	0.223772	0.0021687	4.35015	0.916667	0.0170921	4.38411e-15	0.170522	0.0864198	0.254212	3.62707e-08	5.15027	0.822222	0.064137	1	0.862254	0.365385	0.0954091	1	1.42849	0.666667	0.121533	1	1.95203	0.732394	0.136939	3.59743e-09	2.27988	0.950617	0.128698	0.00411053	2.10283	0.915254	0.0589464
asf1bb	0.0309233	3.52054e-07	0.736134	0.622642	0.0571723	1	1.57402	0.810811	0.129751	1	4.4822	0.980769	0.135232	0.735608	4.73038	0.922222	0.211963	6.37475e-06	8.53958	0.958333	0.105843	1	3.44296	0.82716	0.137484	1	4.83333	0.844444	0.0846463	1	2.58499	0.711538	0.0593377	1	1.64913	0.622222	0.0856814	1	2.6254	0.901408	0.089352	1	2.76995	0.938272	0.0692025	1	2.00157	0.983051	0.0699814
si:ch211-191j22.7	0.0997931	1	1.24674	0.679245	0.0159634	1	0.129472	0.189189	0.00965298	0.197724	0.0713615	0.115385	0.0266128	0.217007	0.239508	0.166667	0.0217589	1	0.187717	0.125	0.375864	2.737e-54	7.08677	0.987654	0.307653	1.2e-11	5.45849	0.822222	0.139505	1	1.92429	0.596154	0.0359905	1	0.346285	0.177778	0.025089	0.551106	0.222975	0.140845	0.0292692	1	0.268897	0.296296	0.0117563	1	0.0900306	0.186441	0.0100565
rec8a	0.0116892	1	0.117905	0.0943396	0.00966574	1	0.0942369	0.189189	0.00790115	1	0.0743999	0.0961538	0.034776	1	0.437738	0.266667	0.0784198	1	1.20793	0.5	0.333725	1.3802e-44	8.00717	0.950617	0.367683	2.51356e-21	9.08234	0.911111	0.183711	0.00105309	3.64103	0.673077	0.01052	1	0.104116	0.0666667	0.002651	1.66054e-05	0.0210839	0.0140845	0.0106117	0.00536806	0.105186	0.0740741	0.00207092	0.00283676	0.0159155	0.0338983	0.00294627
moto	0.0356167	8.2949e-05	0.763922	0.641509	0.0417643	1	0.929487	0.783784	0.0571574	1	1.37343	0.865385	0.0930328	1	2.54599	0.844444	0.101038	1	2.83061	0.875	0.234523	2.86882e-34	8.52132	0.962963	0.20561	1.94192e-05	7.15979	0.911111	0.111907	1	3.22926	0.807692	0.0919001	1	2.50634	0.844444	0.091637	1	2.49716	0.915493	0.0754927	1	1.95055	0.901235	0.0607974	1	1.48404	0.915254	0.0617341
marcksl1b	0.151492	0.0767123	4.49185	0.943396	0.0895617	1	2.27444	0.864865	0.0740939	1	1.78656	0.884615	0.174581	1.1655e-05	5.41153	0.933333	0.140725	1	4.07902	0.916667	0.229531	2.82534e-20	7.76779	0.938272	0.101626	1	2.67478	0.622222	0.0850493	1	2.12907	0.653846	0.039697	0.00304835	0.818806	0.422222	0.0399345	3.48333e-06	0.824854	0.478873	0.0710852	1	1.69517	0.901235	0.0516851	1	1.13587	0.830508	0.0462181
DHDH	0.0591477	1	0.932574	0.698113	0.0667022	1	1.08484	0.810811	0.0921067	1	1.63503	0.865385	0.14958	1.78298e-05	3.06394	0.888889	0.136886	1	2.7287	0.75	0.226532	1.49715e-23	5.29435	0.938272	0.207042	0.000146559	4.70024	0.866667	0.104236	1	1.91664	0.615385	0.0556257	1	0.86352	0.488889	0.0478193	0.248925	0.715096	0.464789	0.0287857	6.80907e-07	0.382996	0.444444	0.0357597	1	0.499371	0.576271	0.0357708
pdia4	0.060175	1	1.52382	0.811321	0.0478161	1	1.14339	0.810811	0.0630965	1	1.6174	0.884615	0.0908816	1	2.57007	0.833333	0.0997407	1	2.89579	0.791667	0.223617	3.32403e-38	8.32209	0.987654	0.156656	1	5.20524	0.777778	0.0942034	1	2.69103	0.769231	0.0696179	1	1.83103	0.666667	0.064792	1	1.67232	0.760563	0.0712662	1	1.88604	0.888889	0.0874178	1	2.44547	0.915254	0.0917449
arl13a	0.0197847	2.26979e-09	0.271049	0.339623	0.0396935	1	0.632492	0.567568	0.0508604	1	0.86008	0.634615	0.0886067	1	1.73317	0.7	0.0854028	1	1.65352	0.583333	0.221427	3.20814e-16	5.72208	0.901235	0.140031	1	3.13092	0.711111	0.115686	1	2.44253	0.75	0.105696	1	2.17356	0.777778	0.108235	1	2.24115	0.816901	0.0823485	1	1.57848	0.864198	0.0980703	1	1.97388	0.898305	0.0646274
samd13	0.0760038	1	1.2928	0.90566	0.0976658	1	1.78069	0.972973	0.0982723	1	1.79491	0.942308	0.126707	0.941486	2.49274	0.866667	0.102191	1	1.88748	0.625	0.213151	4.08345e-20	4.93446	0.950617	0.203533	9.79342e-06	4.64222	0.888889	0.160305	1	3.38934	0.788462	0.0579307	1	0.91786	0.488889	0.0293892	7.00252e-09	0.396817	0.309859	0.0207774	5.72157e-14	0.260731	0.308642	0.0288058	0.011823	0.387241	0.508475	0.0324476
arid4a	0.0495865	0.321664	1.93766	0.924528	0.0575025	1	2.33144	0.945946	0.0774295	1	3.39367	1	0.102431	1	4.85374	0.933333	0.106182	1	5.08397	0.958333	0.211788	3.32223e-32	12.5442	0.975309	0.172764	0.000828918	9.58787	0.977778	0.128762	1	6.52607	0.923077	0.0735447	1	3.17908	0.8	0.0935804	1	4.3218	0.957746	0.0883759	1	4.01655	0.987654	0.0684006	1	2.90039	0.966102	0.0751659
tmed4	0.0676723	1	0.881513	0.679245	0.0799652	1	1.08919	0.918919	0.0523911	1	0.639302	0.615385	0.130119	1	2.03806	0.844444	0.148903	1	2.43022	0.791667	0.2114	3.73027e-08	3.85506	0.82716	0.126618	1	1.96703	0.533333	0.111845	1	1.67484	0.634615	0.083616	1	1.15292	0.577778	0.0708204	1	0.933655	0.549296	0.0739777	1	0.986681	0.765432	0.0829572	1	1.14135	0.847458	0.0755945
dpysl5a	0.0463355	1	0.614361	0.490566	0.0485821	1	0.651594	0.648649	0.0365532	1	0.458354	0.519231	0.083769	1	1.29399	0.644444	0.122532	1	2.11069	0.708333	0.211351	9.291e-13	4.31535	0.839506	0.20279	0.000680656	4.08577	0.822222	0.239428	5.73335e-15	5.08993	0.942308	0.10693	1	1.76967	0.622222	0.0465242	1	0.617469	0.464789	0.0368342	1	0.46269	0.481481	0.0388948	1	0.494758	0.542373	0.0234044
zgc:92606	0.0669002	1	0.985326	0.660377	0.118894	1	2.05575	1	0.0984923	1	1.61236	0.865385	0.115656	1	1.98353	0.777778	0.0816215	1	1.26788	0.666667	0.210084	1.79267e-09	4.33596	0.839506	0.15094	1	2.80552	0.622222	0.124546	1	2.18345	0.634615	0.124761	1	2.18835	0.688889	0.0742689	1	1.12455	0.619718	0.0429981	1	0.567163	0.592593	0.0339517	0.0984435	0.424	0.508475	0.0317398
apela	0.085358	1	0.987776	0.773585	0.0458264	1	0.451634	0.459459	0.0186397	0.64759	0.150836	0.288462	0.0702613	1	0.77138	0.411111	0.108634	1	1.34608	0.583333	0.209132	1.45804e-14	3.17157	0.839506	0.239587	9.41438e-06	3.79676	0.8	0.211943	1.38038e-08	3.22807	0.846154	0.142239	1	1.91022	0.644444	0.030259	0.0142308	0.271021	0.211268	0.0330828	1	0.30225	0.345679	0.0249307	1	0.214156	0.305085	0.0208501
kifap3a	0.0564568	1	0.627043	0.566038	0.0753666	1	0.902478	0.837838	0.0845988	1	1.04541	0.865385	0.0858078	1	1.06451	0.588889	0.0667996	1	0.77469	0.5	0.205825	5.58709e-11	3.32429	0.864198	0.189701	0.841317	2.98471	0.8	0.162704	1	2.43853	0.730769	0.129999	1	1.81848	0.688889	0.0795472	1	0.966546	0.605634	0.0677163	1	0.788132	0.641975	0.0552125	1	0.609794	0.728814	0.0522612
echs1	0.041614	0.101932	0.690828	0.603774	0.0799515	1	1.56634	0.918919	0.103279	1	2.17375	0.923077	0.120011	1	2.63919	0.833333	0.0947983	1	1.94708	0.583333	0.204954	3.65835e-19	5.32261	0.938272	0.14935	1	3.50936	0.822222	0.111341	1	2.39506	0.730769	0.077981	1	1.51742	0.666667	0.0547861	0.0245215	0.972377	0.56338	0.0552125	1	0.981851	0.777778	0.0746722	1	1.43615	0.898305	0.0726054
ahi1	0.0859002	1	1.26583	0.830189	0.076304	1	1.08863	0.837838	0.0884955	1	1.31489	0.826923	0.103703	1	1.61163	0.711111	0.129967	1	2.15875	0.666667	0.204274	1.40965e-09	3.90827	0.839506	0.152889	1	2.66879	0.711111	0.137504	1	2.32326	0.692308	0.117604	1	1.89598	0.666667	0.0552318	0.999766	0.724441	0.464789	0.046743	1	0.588399	0.617284	0.0447913	1	0.55807	0.644068	0.0494335
hmgn2	0.0325942	5.07999e-06	15.3611	0.962264	0.038713	1	18.9743	1	0.101781	1	64.0566	1	0.148437	1.59094e-14	104.536	1	0.16578	0.0312872	120.836	1	0.202697	9.90883e-44	157.505	1	0.212726	1.47503e-25	167.89	1	0.153568	3.98849e-07	109.293	1	0.0432281	1	21.7437	1	0.0202091	1.32327e-23	8.60265	0.957746	0.0406596	0.511393	20.1579	1	0.065146	1	36.2899	1	0.0453269
pik3r3b	0.123399	1	2.04192	0.943396	0.0774334	1	1.12226	0.783784	0.0780441	1	1.13352	0.730769	0.0831734	1	1.22918	0.666667	0.086556	1	1.29331	0.541667	0.201932	8.50998e-09	3.89473	0.851852	0.168852	1	3.07633	0.666667	0.139388	1	2.39288	0.692308	0.0778364	1	1.12969	0.6	0.067202	1	0.937906	0.591549	0.0644473	1	0.889691	0.753086	0.0672625	1	0.938972	0.830508	0.078871
hist1h4l.14	0.00732502	0.0171854	0.0438847	0.0754717	0.0128471	1	0.0849664	0.162162	0.0660852	1	0.62675	0.538462	0.0548734	1	0.496243	0.255556	0.316279	8.00578e-06	4.8094	0.791667	0.0262404	0.0194765	0.200045	0.0987654	0.349421	2.69054e-18	5.47852	0.8	0.0673064	1	0.641398	0.192308	0.028514	1	0.221308	0.2	0.0459559	1	0.397872	0.323944	0.0678078	1	0.647436	0.555556	0.0730213	1	0.711026	0.694915	0.0431879
ripply2	0.0405372	1	0.80274	0.622642	0.0181761	0.000364589	0.302763	0.324324	0.0698691	1	1.58454	0.634615	0.0617588	1	1.35625	0.611111	0.0628421	1	1.38624	0.458333	0.120973	1	3.20065	0.592593	0.329747	1.50163e-37	11.9701	1	0.180916	4.82759e-06	5.41849	0.903846	0.102481	1	2.58309	0.844444	0.0779649	1	1.82079	0.788732	0.083063	1	1.97365	0.950617	0.0748881	1	1.73005	0.881356	0.032228
si:ch1073-153i20.4	0.0210654	0.000190253	0.313906	0.301887	0.0217162	1	0.325629	0.405405	0.0460838	1	0.817049	0.519231	0.042042	0.00366698	0.72923	0.366667	0.195541	0.0675297	5.21376	0.916667	0.0225006	2.62557e-14	0.339869	0.160494	0.304597	1.88815e-23	9.36738	0.955556	0.123569	1	2.85718	0.653846	0.0990016	1	2.14574	0.733333	0.0987252	1	2.13804	0.802817	0.101564	0.0901609	2.21742	0.925926	0.0970377	1	2.09122	0.932203	0.0633703
zgc:194989	0.0277827	1	0.411597	0.490566	0.0352207	1	0.549983	0.486486	0.073231	1	1.36984	0.692308	0.0758957	1	1.43336	0.488889	0.221028	0.393287	5.75042	0.833333	0.0454557	0.0053645	0.753445	0.271605	0.300853	6.93167e-09	8.64462	0.8	0.0664142	1	1.21066	0.403846	0.0915275	1	1.81988	0.644444	0.0955238	1	1.92235	0.690141	0.0850087	1	1.65587	0.765432	0.0787577	1	1.50237	0.779661	0.0423377
mycbpap	0.0751267	1	0.889273	0.603774	0.0401106	1	0.405628	0.486486	0.0319373	1	0.306601	0.461538	0.0183939	2.94541e-06	0.157227	0.122222	0.0326137	1	0.314563	0.208333	0.106731	1	1.39349	0.382716	0.287019	4.45236e-19	5.10612	0.933333	0.305346	6.23154e-23	5.54002	0.903846	0.173303	0.00602583	2.62128	0.777778	0.0471716	1	0.495817	0.366197	0.0284736	1	0.26653	0.308642	0.0212878	1	0.187407	0.305085	0.0105327
tspan35	0.0533971	1	0.644449	0.584906	0.0486574	1	0.573939	0.621622	0.0204333	1	0.198686	0.288462	0.0230926	0.00129271	0.230263	0.222222	0.0183063	1	0.174117	0.125	0.1212	1	1.82944	0.592593	0.272379	8.81836e-12	5.30714	0.844444	0.274812	6.00256e-21	5.36989	0.942308	0.223605	5.06488e-14	4.08746	0.977778	0.057231	1	0.702848	0.422535	0.0198686	4.7393e-05	0.192101	0.185185	0.0211856	1	0.207523	0.305085	0.0164002
cdc6	0.101882	1	3.38735	0.90566	0.0404128	1	1.05663	0.756757	0.0967319	1	3.16885	0.923077	0.117531	1	4.07365	0.855556	0.150496	1	5.62131	1	0.112675	1	3.85716	0.728395	0.268846	3.72789e-24	12.0876	0.955556	0.06697	1	1.9845	0.557692	0.0340277	0.000100341	0.855178	0.444444	0.0514774	1	1.42664	0.746479	0.0640752	1	1.87698	0.888889	0.0674595	1	2.00283	0.949153	0.0544489
rbm46	0.0457243	1	1.38542	0.849057	0.0645061	1	2.13018	0.918919	0.085327	1	3.03705	0.980769	0.0976638	1	3.61026	0.888889	0.0746263	1	2.56103	0.791667	0.196763	1.43906e-24	9.00071	0.987654	0.258697	3.14127e-25	12.9277	1	0.218014	4.43888e-20	10.3077	1	0.104989	1	3.96231	0.888889	0.0179749	2.4917e-14	0.444219	0.28169	0.007528	2.93321e-27	0.158757	0.209877	0.0129716	2.65557e-09	0.301143	0.423729	0.0187045
znfl2a	0.0368534	0.798619	0.467288	0.471698	0.0315473	1	0.386203	0.486486	0.0856769	1	1.34408	0.826923	0.115976	1	1.98374	0.677778	0.134463	1	2.40396	0.833333	0.153703	1	2.86303	0.716049	0.258118	1.17567e-13	5.67464	0.933333	0.0960353	1	1.55549	0.519231	0.0855068	1	1.34067	0.644444	0.0726647	1	1.09007	0.690141	0.0665306	1	0.975074	0.777778	0.0671238	1	0.986058	0.779661	0.0469171
oclna	0.0372614	1	0.341955	0.396226	0.0272169	1	0.232899	0.27027	0.0254401	1	0.214574	0.326923	0.0487028	1	0.476251	0.333333	0.0392733	1	0.364834	0.291667	0.208183	3.39202e-14	3.0822	0.790123	0.249354	1.96459e-11	3.91369	0.844444	0.151944	0.417778	2.03601	0.692308	0.079562	1	0.882974	0.533333	0.0142689	2.99501e-06	0.107184	0.112676	0.0149852	6.63827e-05	0.113617	0.197531	0.0274648	1	0.23548	0.389831	0.0645377
ccne2	0.0341507	0.866029	0.501568	0.433962	0.0267625	1	0.372511	0.459459	0.135097	1	2.85068	0.923077	0.120261	1	2.45053	0.722222	0.19891	1	4.73765	0.833333	0.0638389	1	1.09092	0.407407	0.243846	2.0883e-08	6.20297	0.844444	0.0978589	1	1.87808	0.557692	0.0902808	1	1.6937	0.688889	0.0513925	1	0.831329	0.535211	0.0616418	1	1.04389	0.777778	0.0730881	1	1.29423	0.779661	0.0636309
hmgb1a	0.014932	2.03178e-07	4.44248	1	0.0250412	1	8.26567	1	0.0355742	1	12.6839	1	0.0589038	1	23.7157	0.988889	0.0694059	1	29.1583	1	0.161436	1.6209e-19	86.5584	1	0.2364	9.67738e-23	143.196	1	0.27945	4.78742e-43	178.672	1	0.206849	3.41721e-14	120.003	1	0.0557396	1	22.1304	0.985915	0.0252144	0.0410935	8.33497	1	0.0161077	1.90592e-08	4.86258	0.966102	0.0131366
pds5a	0.050256	1	1.12602	0.716981	0.0492291	1	1.09744	0.783784	0.0598411	1	1.40074	0.961538	0.103123	1	2.79806	0.9	0.111969	1	3.11151	0.833333	0.17614	1.13345e-15	5.62083	0.975309	0.227997	2.03188e-14	7.90386	0.955556	0.200557	3.251e-15	6.67075	1	0.0836321	1	2.13933	0.822222	0.0577395	1	1.3393	0.71831	0.0562605	1	1.29647	0.851852	0.0486739	1	1.08206	0.830508	0.0382619
zglp1	0.0131459	1.2111e-09	0.54899	0.509434	0.00549859	2.68009e-12	0.197664	0.297297	0.00999862	7.83143e-14	0.397333	0.403846	0.017184	4.80982e-21	0.755309	0.433333	0.0239688	1	1.12709	0.5	0.0902984	1	5.8587	0.975309	0.226811	1.35238e-28	19.4904	1	0.187197	1.19282e-18	15.1225	1	0.117011	0.181148	8.17895	1	0.0949777	1	6.25046	0.985915	0.0872975	1	5.61091	1	0.0930191	1	6.0857	0.966102	0.0964749
efnb2a	0.0634526	1	0.975976	0.773585	0.0560747	1	0.835702	0.702703	0.0742687	1	1.19069	0.807692	0.0848198	1	1.40986	0.722222	0.113278	1	2.04448	0.833333	0.154985	0.0498231	3.07523	0.82716	0.222812	4.69971e-05	4.96254	0.844444	0.218637	1.08649e-08	4.83986	0.903846	0.097369	1	1.68221	0.733333	0.0440305	0.0199972	0.618422	0.464789	0.0664737	1	1.03489	0.728395	0.0564813	1	0.843294	0.711864	0.0467552
ccdc9b	0.0843296	1	1.49812	0.90566	0.0568208	1	0.909538	0.837838	0.0849744	1	1.51275	0.826923	0.073598	1	1.26004	0.688889	0.0983797	1	1.82484	0.666667	0.109421	1	2.09278	0.666667	0.221089	8.53512e-13	5.25804	0.933333	0.18211	0.0547823	4.0695	0.846154	0.101259	1	1.8938	0.688889	0.0748554	1	1.2874	0.647887	0.0649786	1	1.07651	0.802469	0.0688089	1	1.1572	0.864407	0.0575816
cpeb4b	0.0809729	1	3.5366	1	0.0439169	1	1.64057	0.891892	0.0449363	1	1.6879	0.865385	0.0814975	1	3.56581	0.855556	0.0933184	1	4.23943	0.875	0.189483	2.11066e-20	10.6608	0.987654	0.219492	1.23957e-15	12.9471	1	0.211823	1.60562e-18	12.3521	1	0.0948258	1	4.32742	0.844444	0.0473814	0.040223	1.80263	0.788732	0.0524235	1	2.04456	0.901235	0.0563831	1	2.23941	0.898305	0.0592684
brap	0.0515518	1	0.662954	0.584906	0.0630641	1	0.853394	0.783784	0.0516101	1	0.663889	0.673077	0.0649937	1	0.886408	0.533333	0.0738105	1	1.04102	0.541667	0.168439	0.00106975	3.02282	0.790123	0.219124	4.75106e-07	4.2774	0.866667	0.211672	4.01177e-07	4.08601	0.865385	0.128208	1	2.11536	0.755556	0.0739381	1	1.0433	0.633803	0.0515071	1	0.662237	0.703704	0.03383	0.446234	0.39386	0.508475	0.0417119
parp2	0.0236325	7.32171e-11	0.875714	0.679245	0.0206873	1.4517e-07	0.745809	0.648649	0.0293409	1.41402e-05	1.13874	0.788462	0.0573469	0.520998	2.60598	0.822222	0.0713536	1	3.43151	0.916667	0.108366	1	5.85363	0.888889	0.218474	2.9822e-19	14.6595	1	0.255945	1.94631e-37	18.0768	1	0.120266	1	6.69837	1	0.0966243	1	5.0503	0.985915	0.0932975	1	4.82835	1	0.0858213	1	4.3391	1	0.057995
mcm2	0.0336658	3.80703e-09	2.94824	0.981132	0.0711174	1	7.47869	1	0.0993162	1	11.4501	0.980769	0.1262	2.8552e-05	15.6058	1	0.13329	1	16.756	0.958333	0.152905	3.73872e-13	20.0478	1	0.218256	2.20979e-25	32.0412	1	0.16279	3.31228e-09	21.7649	1	0.0667648	1	6.90505	0.955556	0.0534934	0.0416675	5.228	0.943662	0.064789	1	6.6484	1	0.0498158	1	4.78359	1	0.0358593
ptmaa	0.0351753	0.472284	2.22996	0.924528	0.0422854	1	2.79769	0.945946	0.0582089	1	4.16513	0.961538	0.0965318	1	7.91259	0.977778	0.154757	1	14.598	1	0.18498	3.03713e-27	18.4571	1	0.217667	4.95495e-17	22.8838	1	0.21101	1.21332e-22	21.9627	1	0.117154	1	10.1565	1	0.0521731	1	3.6321	0.915493	0.03464	0.00316012	2.18839	0.962963	0.0248646	1.25402e-09	1.46087	0.864407	0.0300115
tnnc2	0.0726212	1	2.00378	0.924528	0.0676335	1	1.83136	0.972973	0.0611779	1	1.61397	0.903846	0.0607873	1	1.60103	0.744444	0.0601102	1	1.57867	0.625	0.148698	0.000597732	5.0434	0.901235	0.217496	5.99983e-10	8.32193	0.933333	0.228592	4.63665e-21	8.88841	1	0.189483	2.14915e-09	6.93566	0.977778	0.0817776	1	2.32999	0.816901	0.0372437	0.270716	0.870838	0.703704	0.023882	4.31976e-06	0.506477	0.542373	0.016426
mcm6	0.0463484	1	3.79861	1	0.0891478	1	8.65953	1	0.119005	0.359152	12.5611	1	0.166334	1.72582e-20	19.4479	1	0.158953	1	18.3225	0.958333	0.186726	2.73408e-22	22.6465	1	0.217087	1.3027e-18	27.6345	1	0.127316	1	13.7114	0.961538	0.0199682	1.6733e-16	1.35875	0.533333	0.0329964	0.000246172	2.49868	0.873239	0.0410707	1	3.27048	0.987654	0.0264305	0.000485509	1.90648	0.966102	0.0184275
ankrd12	0.0952611	1	5.12524	1	0.0668497	1	3.26601	1	0.0682212	1	3.35083	0.903846	0.0914103	1	4.86124	0.966667	0.115755	1	6.58827	0.958333	0.162247	2.30932e-09	10.233	0.962963	0.214444	6.64442e-19	14.7822	1	0.20158	1.54694e-15	13.6212	0.980769	0.071912	1	3.58168	0.8	0.0654701	1	3.18124	0.873239	0.050672	1	2.30743	0.938272	0.0456402	0.146941	2.02605	0.864407	0.0491115
cdk2	0.0420667	1	1.86808	0.924528	0.0365274	1	1.56963	0.864865	0.0537806	1	2.5351	0.961538	0.054496	1	2.57732	0.866667	0.0696691	1	3.50976	0.791667	0.124027	1	7.34917	0.950617	0.212829	2.78401e-19	14.9278	1	0.253537	1.97522e-35	18.8194	1	0.188321	1.08815e-09	12.6998	0.977778	0.0684618	1	3.43307	0.873239	0.0547401	1	2.59176	0.987654	0.0457733	1	2.07405	0.983051	0.0310837
psmc3ip	0.0339802	6.19551e-06	1.3357	0.754717	0.033121	0.0224215	1.29445	0.810811	0.062015	1	2.81836	1	0.0696095	1	3.26027	0.833333	0.0763469	1	3.6651	0.916667	0.127153	1	7.0588	0.925926	0.212441	1.59052e-15	13.8482	0.977778	0.233018	1.19386e-30	15.6506	1	0.148695	0.000134598	8.65749	1	0.087538	1	4.36263	1	0.0677806	1	3.15243	0.975309	0.0558117	1	2.46931	0.949153	0.0380745
vamp1	0.0227654	0.000367501	0.234586	0.245283	0.0363193	1	0.414372	0.378378	0.0313495	1	0.346	0.365385	0.0376021	0.000163795	0.432443	0.311111	0.0418016	1	0.492767	0.25	0.198241	6.2142e-07	3.61303	0.790123	0.212261	0.000622706	3.95459	0.822222	0.238663	1.12349e-15	4.61836	0.961538	0.171785	1.21452e-05	2.99123	0.955556	0.10761	1	1.62578	0.788732	0.0688702	1	0.919575	0.753086	0.052293	1	0.650764	0.644068	0.0238886
ccdc36	0.0411478	0.300476	0.68741	0.471698	0.0389914	1	0.643237	0.675676	0.0652435	1	1.22172	0.769231	0.0428106	3.76087e-05	0.721916	0.455556	0.0886082	1	1.80187	0.666667	0.0748566	1	1.45362	0.506173	0.211974	0.0086827	5.6151	0.822222	0.216402	2.20527e-07	5.7708	0.884615	0.102257	1	2.16542	0.711111	0.105926	1	2.26601	0.816901	0.128453	0.00622244	2.90875	0.925926	0.119779	1	2.65628	0.949153	0.0594141
MCMDC2	0.0315804	1	0.427089	0.415094	0.0233792	1	0.296351	0.378378	0.0139251	0.684084	0.159288	0.269231	0.0168336	3.52908e-08	0.19969	0.144444	0.0385775	1	0.545971	0.333333	0.0900536	1	1.58205	0.518519	0.211533	3.31051e-10	4.81585	0.911111	0.309616	4.0811e-27	7.96808	0.961538	0.259534	1.3711e-18	6.31288	0.977778	0.108044	1	1.99922	0.732394	0.0310086	1	0.417658	0.419753	0.015994	0.283434	0.187852	0.271186	0.0124184
cdca7a	0.0993434	1	5.93448	0.962264	0.0592438	1	3.07805	1	0.13374	0.00157333	8.71968	1	0.112971	1	7.00419	0.955556	0.104365	1	6.32329	1	0.103202	1	6.23263	0.950617	0.211394	1.96813e-25	15.9138	1	0.0951354	1	5.61365	0.788462	0.0286111	4.50402e-10	1.25223	0.577778	0.0395248	5.95635e-05	1.86053	0.788732	0.0589938	1	3.06176	0.975309	0.0567939	1	2.91932	0.949153	0.0449413
xrcc1	0.0264654	4.29645e-11	0.529537	0.509434	0.04777	1	1.09369	0.783784	0.0688657	1	1.72964	0.903846	0.100489	1	2.80005	0.855556	0.11906	1	3.48541	0.833333	0.165861	1.00458e-10	5.37299	0.950617	0.211167	2.20192e-11	7.38816	0.955556	0.165479	1	5.35674	0.903846	0.0967371	1	2.66642	0.911111	0.0805084	1	2.10855	0.859155	0.0714128	1	1.81093	0.950617	0.0517787	1	1.20913	0.847458	0.0448925
lin52	0.0765521	1	2.41512	0.943396	0.0502566	1	1.42264	0.918919	0.0642854	1	1.93652	0.961538	0.0799963	1	2.55407	0.833333	0.0693676	1	2.13165	0.75	0.16401	1.81252e-10	6.46529	0.950617	0.210754	1.78246e-15	8.99885	0.977778	0.171632	3.48361e-08	6.8631	0.980769	0.134961	1	5.00951	0.911111	0.0688915	1	2.11318	0.859155	0.0618959	1	1.84637	0.950617	0.0527241	1	1.51026	0.898305	0.0523584
pole	0.0837634	1	1.1937	0.811321	0.0565228	1	0.72617	0.675676	0.143529	1	2.39271	0.923077	0.0939398	1	1.38217	0.611111	0.101485	1	1.52635	0.708333	0.105177	1	1.59824	0.54321	0.208803	0.000236349	3.91791	0.844444	0.135148	1	2.21201	0.634615	0.0844588	1	1.20635	0.533333	0.0617403	1	0.811246	0.577465	0.0796069	1	1.11878	0.765432	0.0745701	1	1.02965	0.847458	0.0754433
paxip1	0.0502678	1	0.746766	0.622642	0.0490589	1	0.72447	0.72973	0.0989931	1	1.76009	0.826923	0.129711	1	2.49648	0.844444	0.141838	1	2.80497	0.708333	0.139783	1	2.75203	0.777778	0.20747	0.000544807	4.62527	0.866667	0.125519	1	2.39207	0.634615	0.0721929	1	1.17658	0.577778	0.0757397	1	1.25034	0.647887	0.081454	1	1.37147	0.839506	0.063151	1	0.993705	0.847458	0.0608896
ubl3a	0.0589905	1	0.700586	0.603774	0.0665601	1	0.815504	0.72973	0.0603078	1	0.72028	0.673077	0.0802501	1	1.03359	0.588889	0.122305	1	1.77642	0.833333	0.12815	1	1.88748	0.679012	0.207409	0.0014358	3.55113	0.8	0.199842	5.86644e-07	3.38091	0.846154	0.114564	1	1.63209	0.666667	0.0732718	1	0.920829	0.619718	0.0406333	0.0732939	0.440535	0.469136	0.043268	1	0.476114	0.610169	0.0471028
tex11	0.0187257	0.000262134	0.324432	0.358491	0.0305318	1	0.586112	0.567568	0.0260149	1	0.482351	0.5	0.0389804	1	0.79087	0.511111	0.0404997	1	0.829066	0.416667	0.104342	1	2.73347	0.691358	0.207404	1.33898e-10	6.71008	0.955556	0.285122	5.48448e-31	10.2229	0.980769	0.236634	6.39738e-17	7.98914	1	0.120863	0.0318871	3.3055	0.915493	0.0491869	1	1.05487	0.82716	0.0282903	1	0.534094	0.559322	0.0186179
si:dkeyp-27c8.2	0.023321	1.40562e-09	0.386016	0.415094	0.04087	1	0.765952	0.675676	0.0814895	1	1.81941	0.884615	0.0759174	1	1.66273	0.777778	0.0538296	1	1.07841	0.458333	0.131479	1	3.36886	0.777778	0.206401	0.00055792	6.09081	0.866667	0.200897	1.17193e-07	5.87707	0.903846	0.146291	0.406621	3.8724	0.955556	0.0717779	1	1.54866	0.746479	0.0612466	1	1.26776	0.864198	0.0750654	1	1.63909	0.847458	0.0718951
rad51ap1	0.0510737	1	0.653741	0.528302	0.0504866	1	0.644389	0.675676	0.0873346	1	1.28652	0.807692	0.0717709	1	1.00233	0.5	0.090195	1	1.34064	0.541667	0.136652	1	2.29315	0.666667	0.206255	8.80389e-06	3.93894	0.866667	0.190034	0.00012501	3.53502	0.846154	0.107202	1	1.67377	0.622222	0.0918388	1	1.37199	0.746479	0.0625715	1	0.843012	0.753086	0.052026	1	0.668979	0.661017	0.0431541
cnpy1	0.0338763	2.22165e-08	1.42135	0.90566	0.0453728	1	2.03776	0.918919	0.059311	1	2.84639	0.980769	0.0627957	0.476089	3.0581	0.933333	0.0642262	1	3.14606	0.875	0.157129	7.75069e-15	9.9404	1	0.205762	1.37533e-14	14.1798	0.977778	0.176207	6.91263e-12	11.556	1	0.119073	1	6.9237	0.955556	0.0870425	1	4.62616	0.901408	0.0890586	1	4.76355	1	0.0912984	1	4.91738	0.983051	0.0789025
ppp4r2b	0.0855928	1	2.15546	0.90566	0.0561404	1	1.2648	0.756757	0.071069	1	1.7018	0.884615	0.131708	0.0324987	3.7573	0.933333	0.102667	1	2.72146	0.75	0.194606	2.36318e-18	6.27071	0.962963	0.205416	1.23632e-07	6.735	0.933333	0.169615	0.416885	5.23181	0.884615	0.0635279	1	1.47714	0.644444	0.0460525	0.00788146	0.988096	0.633803	0.0471286	1	1.01685	0.802469	0.0401282	1	0.833278	0.779661	0.0420891
fbxo25	0.0479695	1	0.451543	0.415094	0.0374828	1	0.332806	0.540541	0.0380553	1	0.339074	0.403846	0.0456631	1	0.424738	0.311111	0.0480887	1	0.452939	0.25	0.134402	1	1.67582	0.592593	0.204967	5.80962e-05	2.91729	0.8	0.215535	1.50644e-05	3.11784	0.769231	0.250764	7.40597e-18	3.80965	0.977778	0.102526	1	1.18014	0.704225	0.0428736	1	0.392827	0.444444	0.0236372	0.0136137	0.189663	0.237288	0.0220589
mfn1b	0.0502054	1	0.622921	0.584906	0.0677085	1	0.906413	0.783784	0.0632227	1	0.831377	0.769231	0.0960894	1	1.4153	0.666667	0.0830848	1	1.1751	0.458333	0.176567	0.24762	3.12331	0.753086	0.204504	0.00258936	3.79133	0.822222	0.157911	1	2.69695	0.730769	0.114971	1	1.78346	0.711111	0.073932	1	1.01307	0.619718	0.0599073	1	0.776947	0.716049	0.0497031	1	0.615168	0.762712	0.050802
fermt1	0.094918	1	3.35343	0.981132	0.0599174	1	1.8705	0.945946	0.0717255	1	2.34663	0.942308	0.0382771	6.39578e-10	1.07149	0.477778	0.0360593	1	0.995634	0.541667	0.14439	0.109547	5.77358	0.888889	0.204114	7.6437e-12	9.10269	0.977778	0.24123	3.65251e-21	11.3549	0.961538	0.159547	0.392323	6.57993	0.911111	0.0406915	0.0811698	1.15543	0.619718	0.0301776	7.32711e-06	0.800607	0.62963	0.0495596	1	1.47538	0.79661	0.0670813
pclaf	0.0363962	4.21885e-07	3.58464	0.943396	0.0247719	1.02416e-09	2.24178	0.918919	0.0952005	1	11.9819	1	0.0945085	1	11.8703	0.955556	0.171388	0.000110969	25.7309	1	0.103698	1	13.3739	1	0.203753	2.13996e-32	32.3248	1	0.10381	1	13.3925	0.942308	0.0509527	1	5.43608	0.977778	0.0694992	1	8.0261	0.985915	0.092234	1	11.5055	1	0.0908009	1	11.2771	1	0.0972788
rarres3l	0.0476158	1	0.98529	0.584906	0.0445975	1	0.908374	0.783784	0.024711	1	0.440749	0.480769	0.019733	1.32984e-05	0.336002	0.266667	0.0187587	1	0.316184	0.166667	0.152034	2.98256e-05	4.33546	0.790123	0.203558	1.86336e-08	6.36619	0.911111	0.308838	5.32261e-31	11.0456	0.980769	0.243274	4.55959e-12	8.05955	0.933333	0.056549	1	1.22102	0.619718	0.020438	0.00156312	0.350485	0.333333	0.00714956	5.84396e-07	0.101091	0.20339	0.0128576
tmem30ab	0.068056	1	1.22135	0.811321	0.0643305	1	1.13764	0.810811	0.0749114	1	1.3791	0.865385	0.113807	1	2.35642	0.866667	0.149928	1	3.37332	0.875	0.178701	4.57052e-11	4.2481	0.91358	0.203039	0.00274751	5.02772	0.844444	0.122854	1	2.60195	0.730769	0.0698126	1	1.26132	0.622222	0.0764822	1	1.4159	0.676056	0.052158	1	0.874581	0.740741	0.0474929	1	0.778262	0.745763	0.0671554
rai14	0.0137551	2.61286e-18	0.500578	0.471698	0.0198706	1.33032e-05	0.77682	0.648649	0.0231369	1.36767e-07	0.933178	0.673077	0.0586075	1	2.92778	0.855556	0.0806356	1	4.38152	0.833333	0.121755	0.00917828	7.44097	0.987654	0.201771	1.26016e-15	14.4268	1	0.229089	3.806e-26	17.0655	1	0.199152	5.5309e-15	14.1799	1	0.130075	0.000182164	8.10837	0.985915	0.0737569	1	3.91234	0.975309	0.0551377	1	2.71231	0.932203	0.040645
si:ch211-161h7.4	0.0518893	1	2.25859	0.981132	0.0470062	1	1.99712	0.918919	0.0953905	1	4.87893	1	0.0774661	1	3.74041	0.888889	0.0856951	1	4.25357	0.958333	0.0976858	1	5.03014	0.851852	0.201729	1.18544e-18	12.9566	1	0.206009	2.52279e-17	13.3212	0.980769	0.146352	0.205859	8.49526	0.977778	0.0894348	1	4.49219	1	0.0806619	1	3.93773	0.987654	0.070098	1	3.29535	0.966102	0.0450023
spata4	0.0603928	1	1.32759	0.773585	0.0565177	1	1.22164	0.756757	0.0289781	0.000616039	0.535475	0.576923	0.0415055	4.31488e-09	0.832084	0.488889	0.0510867	1	1.07677	0.5	0.146208	0.53539	4.12427	0.864198	0.20141	0.000713192	6.28511	0.888889	0.185834	3.75388e-06	5.65151	0.923077	0.164611	0.00137948	4.81765	0.977778	0.120985	1	3.22274	0.901408	0.0751195	1	1.74859	0.901235	0.0564493	1	1.21979	0.745763	0.0593471
sycp3	0.0175675	1.26214e-09	2.05388	0.886792	0.013818	4.06178e-08	1.54259	0.891892	0.0252918	0.0137172	3.18561	0.961538	0.0292111	3.71011e-13	3.7952	0.855556	0.0615408	1	9.54107	1	0.0969399	1	16.9938	1	0.201274	3.49842e-16	44.074	1	0.282655	1.16534e-47	69.0672	1	0.203665	3.81622e-15	44.767	1	0.102063	0.582329	18.1568	1	0.086349	1	14.6539	1	0.0731985	1	11.8763	1	0.0383182
rec8b	0.0617039	1	0.253394	0.264151	0.0538221	1	0.213505	0.216216	0.0113502	1	0.032345	0.0769231	0.00952599	0.0680464	0.0263123	0.0222222	1.11022e-16	1	0	0	0.0830696	1	0.369195	0.197531	0.217433	1	1.29207	0.4	0.456843	2.27367e-32	3.39615	0.846154	0.129184	1	0.651971	0.244444	0.00486051	0.252661	0.0120133	0.0140845	0.0158277	1	0.0479964	0.0740741	0.0214241	1	0.0689987	0.135593	0.0285103
nppb	0.0520699	1	0.329986	0.301887	0.0224139	1	0.117363	0.216216	0.00699921	0.617591	0.0295472	0.0576923	0.0220199	0.0187058	0.114879	0.0666667	1.11022e-16	1	0	0	0.0201219	0.0144871	0.103062	0.0493827	0.171234	1	1.51846	0.444444	0.351208	2.76978e-22	3.91558	0.826923	0.30883	1.01295e-17	3.30937	0.888889	0.0843651	1	0.606544	0.450704	0.0391753	1	0.23187	0.333333	0.0313283	1	0.176241	0.288136	0.00913101
opn1sw2	0.0383605	1	0.381004	0.396226	0.0206243	1	0.179026	0.27027	0.0412032	1	0.416128	0.461538	0.0397756	1	0.398403	0.244444	0.0285051	1	0.26486	0.208333	0.0594757	1	0.657208	0.296296	0.176057	0.303192	2.65591	0.688889	0.34694	8.76104e-32	6.49863	0.961538	0.237333	1.91483e-10	3.94092	0.888889	0.0965535	1	1.21559	0.690141	0.0390889	1	0.389939	0.382716	0.0211043	1	0.184053	0.271186	0.0123796
zte38	0.0132811	0.00484669	0.564033	0.528302	0.0125505	0.16138	0.527439	0.486486	0.0136481	0.044843	0.582579	0.576923	0.00822332	1.38607e-22	0.320615	0.255556	0.0086254	0.00893717	0.339054	0.208333	0.0360305	0.77514	1.88024	0.493827	0.13638	0.0185154	10.1304	0.933333	0.327256	9.30758e-42	32.0968	1	0.311592	2.96561e-30	30.097	1	0.130133	3.75272e-09	9.5301	0.985915	0.0637673	1	3.82386	0.962963	0.048588	1	2.72109	0.949153	0.029667
rad9b	0.0902446	1	1.70646	0.792453	0.0621172	1	1.06251	0.810811	0.0409803	1	0.632758	0.673077	0.0199794	2.63183e-08	0.26378	0.233333	0.0388972	1	0.593315	0.291667	0.0685205	1	1.20237	0.432099	0.171392	0.0007334	3.92453	0.844444	0.324557	1.59944e-40	9.11825	1	0.241869	2.7282e-14	6.18591	0.955556	0.0673172	1	1.17577	0.619718	0.0322194	1	0.470818	0.518519	0.0202436	1	0.267979	0.440678	0.0137577
si:ch211-277c7.7	0.029294	1	0.716581	0.660377	0.0381169	1	0.989303	0.864865	0.0272878	1	0.657305	0.634615	0.0215908	2.76514e-12	0.495079	0.4	0.0260019	1	0.619881	0.333333	0.114864	1	3.97925	0.777778	0.175928	2.39976e-06	6.94388	0.933333	0.309841	5.47454e-37	14.6673	1	0.252354	2.99392e-14	11.1863	0.977778	0.0551898	1	1.56606	0.704225	0.054949	1	1.55752	0.814815	0.0513453	1	1.43101	0.898305	0.0385553
rnf212b	0.0378561	1	0.65231	0.584906	0.0533616	1	0.998428	0.783784	0.043775	1	0.780464	0.75	0.042274	0.185922	0.747482	0.511111	0.0510002	1	0.9436	0.541667	0.0730496	1	1.48213	0.54321	0.182966	2.28354e-05	4.86229	0.911111	0.302958	1.04118e-31	9.46923	0.961538	0.223336	3.56082e-15	6.32779	0.977778	0.0836749	1	1.76136	0.71831	0.0686235	1	1.36944	0.864198	0.0503833	1	0.929398	0.813559	0.0246402
sdsl	0.0145631	0.00703712	0.20163	0.226415	0.014045	1	0.193128	0.324324	0.0150972	0.00811171	0.210464	0.211538	0.00985085	9.65423e-15	0.126973	0.111111	0.0167522	1	0.238273	0.166667	0.0302777	0.0656482	0.48687	0.259259	0.106616	1	2.35854	0.688889	0.295019	1.49561e-26	8.97396	0.980769	0.342697	1.0232e-31	10.9224	1	0.153003	8.54838e-09	3.77234	0.887324	0.0744337	1	1.48963	0.839506	0.0294021	1	0.469754	0.610169	0.0246127
dnah5l	0.113323	1	0.92269	0.45283	0.0759099	1	0.552193	0.378378	0.0110211	1	0.0524015	0.0961538	0	1.88769e-10	0	0	0	1	0	0	0.046739	1	0.300394	0.123457	0.101222	1	0.797617	0.288889	0.287835	6.50321e-17	3.14094	0.826923	0.333045	1.48944e-16	3.80467	0.822222	0.127135	1	1.07108	0.56338	0.0283455	1	0.162444	0.209877	0.0153504	1	0.0776205	0.135593	0.00966832
si:dkey-74k8.3	0.087501	1	0.687617	0.584906	0.0510444	1	0.348313	0.405405	0.043429	1	0.28497	0.346154	0.033513	0.902874	0.207097	0.2	0.0547087	1	0.379807	0.25	0.183098	1	1.7946	0.530864	0.219681	0.15775	2.28287	0.622222	0.285877	1.02588e-13	3.23451	0.807692	0.132396	1	1.17327	0.533333	0.0208421	0.0232806	0.116338	0.140845	0.0245982	0.0505774	0.142103	0.185185	0.0416442	1	0.270554	0.40678	0.0428039
sycp2	0.0316514	0.0204522	1.14372	0.773585	0.0434329	1	1.68797	0.918919	0.0373052	1	1.3991	0.903846	0.0357018	8.91673e-13	1.32555	0.622222	0.0559919	1	2.31567	0.666667	0.105414	1	5.1721	0.901235	0.176658	3.57064e-07	10.139	0.977778	0.283659	2.33593e-42	18.961	1	0.196976	2.13062e-13	11.7046	1	0.0944376	1	4.49029	0.943662	0.080197	1	3.64413	1	0.0647356	1	2.77854	0.966102	0.0504929
ccdc73	0.0242394	1	0.219365	0.283019	0.0299842	1	0.284051	0.432432	0.0233014	0.343927	0.209142	0.230769	0.0467611	1	0.490794	0.344444	0.0690131	1	0.799196	0.458333	0.176375	0.000411487	2.68443	0.703704	0.222203	0.00024907	3.64194	0.755556	0.282942	4.21186e-18	5.01399	0.903846	0.1761	1	2.67891	0.688889	0.0509327	1	0.545852	0.408451	0.0407397	1	0.413775	0.481481	0.0514879	1	0.553281	0.610169	0.0276695
si:ch211-10a23.2	0.0498853	1	1.3421	0.698113	0.043161	1	1.12128	0.72973	0.0267144	1	0.622749	0.576923	0.0413555	1	1.06357	0.555556	0.0757655	1	2.26959	0.833333	0.111023	0.416889	3.70212	0.888889	0.196423	6.87955e-09	7.80674	0.933333	0.282532	6.50037e-29	12.6272	0.980769	0.239375	2.1232e-16	10.141	0.977778	0.0747156	1	2.22976	0.802817	0.0417821	1	1.07714	0.777778	0.0232327	0.0382987	0.525829	0.542373	0.0190507
msh5	0.0177639	0.0365082	0.239539	0.264151	0.0114035	0.0803347	0.141408	0.216216	0.0156189	0.0650553	0.205398	0.307692	0.0249529	2.20044e-05	0.360675	0.266667	0.036421	1	0.572138	0.25	0.0533078	1	0.917201	0.308642	0.157623	0.702131	3.67606	0.777778	0.281427	3.79697e-23	7.90306	0.961538	0.297892	5.06642e-24	8.51855	0.977778	0.147934	1.19203e-06	3.3829	0.901408	0.0688756	1	1.26546	0.839506	0.038952	1	0.62146	0.627119	0.0224816
hfm1	0.0461064	1	0.541935	0.490566	0.0442007	1	0.514297	0.513514	0.0285411	1	0.300568	0.384615	0.0304479	2.40461e-07	0.325222	0.266667	0.0266292	1	0.276266	0.166667	0.0680699	1	0.882583	0.407407	0.150425	1	2.44761	0.622222	0.279267	8.28279e-19	5.53781	0.923077	0.241504	1.35956e-16	4.56954	1	0.127909	1	1.98086	0.774648	0.078241	1	1.05288	0.790123	0.0707944	1	0.927468	0.864407	0.0390905
galn	0.088741	1	1.3791	0.566038	0.0421252	1	0.540577	0.540541	0.0404918	1	0.5148	0.480769	0.0115931	2.74159e-15	0.113866	0.133333	0.0454012	1	0.593114	0.333333	0.0212281	6.56122e-12	0.234291	0.111111	0.117789	1	1.98557	0.466667	0.276723	4.45919e-14	6.10356	0.884615	0.225093	3.2358e-11	4.64417	0.933333	0.158574	0.00021656	2.92595	0.816901	0.105381	1	1.71955	0.82716	0.0765137	1	1.14172	0.847458	0.0303517
dnah7	0.0794439	1	0.652031	0.566038	0.0688862	1	0.5442	0.567568	0.0412794	1	0.287037	0.384615	0.0306666	0.000289305	0.199268	0.177778	0.0550103	1	0.410161	0.25	0.110337	1	0.99343	0.382716	0.172842	1	1.78402	0.622222	0.275403	3.8853e-14	3.30224	0.826923	0.205395	0.00451506	2.24007	0.733333	0.0880753	1	0.743675	0.492958	0.0454582	1	0.323431	0.419753	0.048616	1	0.351572	0.508475	0.0254968
ccdc83	0.0557082	1	1.21481	0.698113	0.0466294	1	0.97319	0.72973	0.0436064	1	0.895571	0.730769	0.0296345	1.39765e-05	0.55719	0.366667	0.0547934	1	1.1899	0.583333	0.0360033	6.37942e-07	0.70709	0.259259	0.182674	0.0019807	5.59434	0.866667	0.275048	2.93367e-30	9.61108	1	0.244261	1.94676e-16	8.21422	0.977778	0.150866	3.55599e-09	4.35087	0.971831	0.0582655	1	1.28507	0.802469	0.035439	1	0.693503	0.694915	0.012086
cfap70	0.0749334	1	0.886768	0.603774	0.0795619	1	0.956919	0.72973	0.0696891	1	0.808921	0.634615	0.029141	4.5817e-06	0.274281	0.211111	0.0561756	1	0.616783	0.291667	0.123148	1	1.67765	0.604938	0.175428	1	2.66487	0.688889	0.273694	9.42889e-14	4.79758	0.846154	0.207305	2.39339e-08	3.32172	0.911111	0.0553969	1	0.606101	0.422535	0.0322127	1	0.309977	0.37037	0.0220258	0.390947	0.195354	0.322034	0.0367758
si:ch211-266g18.10	0.0776192	1	1.01108	0.584906	0.0672199	1	0.842703	0.594595	0.0387203	1	0.423634	0.403846	0.0243469	1.33211e-09	0.240412	0.144444	0.00697921	0.0479341	0.0545843	0.0416667	0.0402036	1.6325e-05	0.443734	0.160494	0.111884	1	1.61545	0.4	0.273581	1.78651e-13	5.22808	0.846154	0.26912	9.2311e-14	5.11571	0.911111	0.104019	1	1.47045	0.676056	0.0619116	1	0.759746	0.604938	0.0771942	1	1.00405	0.745763	0.0736188
msrb1b	0.0158483	0.396252	0.123366	0.169811	0.0155262	1	0.120382	0.243243	0.0105704	0.0153325	0.0763217	0.134615	1.11022e-16	4.87261e-20	0	0	0.00722816	1	0.0488761	0.0416667	0.035352	0.056625	0.325579	0.148148	0.105883	1	1.29319	0.422222	0.273546	1.69796e-16	4.4931	0.884615	0.345239	6.14834e-26	6.10078	0.955556	0.16943	8.52649e-10	2.38579	0.84507	0.085346	1	0.980719	0.740741	0.0533227	1	0.54158	0.661017	0.02299
ipcef1	0.0421962	1	0.325776	0.358491	0.0408167	1	0.312666	0.432432	0.0496052	1	0.39819	0.403846	0.0469948	1	0.372299	0.3	0.0567758	1	0.471318	0.333333	0.151841	1	1.66235	0.567901	0.241321	0.00241706	3.0626	0.666667	0.273164	1.61163e-13	3.60838	0.826923	0.135568	1	1.43348	0.555556	0.0551767	1	0.454761	0.366197	0.0374833	1	0.281495	0.320988	0.0323823	1	0.235246	0.338983	0.0287404
dmc1	0.0152323	0.0409263	0.475519	0.433962	0.0205667	1	0.68123	0.513514	0.0171794	1	0.54895	0.596154	0.00483919	7.4496e-26	0.123955	0.122222	0.00938517	0.0682027	0.268145	0.166667	0.0205812	4.28319e-09	0.681811	0.259259	0.10909	1	5.43104	0.822222	0.267846	3.35728e-26	17.6585	1	0.306927	3.7843e-31	21.1344	1	0.197166	4.21131e-17	11.7738	0.957746	0.107663	6.71922e-07	5.33949	1	0.0592017	1	2.49475	0.949153	0.0252901
SBNO2	0.0329272	1	0.293171	0.301887	0.0390971	1	0.362033	0.405405	0.0338477	1	0.303241	0.461538	0.0520603	1	0.51638	0.366667	0.0571749	1	0.580571	0.375	0.138615	1	1.80182	0.604938	0.189798	1	2.72193	0.688889	0.263487	1.18149e-12	4.20077	0.846154	0.238928	4.50764e-09	3.69053	0.866667	0.0722805	1	0.780013	0.450704	0.0359857	1	0.32691	0.45679	0.0421795	1	0.397591	0.491525	0.0444076
vip	0.0572367	1	0.546555	0.490566	0.0262172	1	0.208775	0.243243	0.0130412	1	0.0903611	0.153846	0.0540759	1	0.509051	0.3	0.247724	0.358742	3.63971	0.708333	0.0933027	1	1.01517	0.37037	0.215017	8.74136e-05	3.01763	0.688889	0.263053	4.19789e-19	3.9407	0.884615	0.1647	0.000637478	2.12303	0.755556	0.0300987	1	0.246968	0.211268	0.0112965	0.000572425	0.0762387	0.0864198	0.00130919	1.18831e-05	0.00637656	0.0169492	0.00367825
si:ch211-152c8.2	0.01091	4.73363e-10	0.169331	0.245283	0.0143813	0.0134032	0.234877	0.405405	0.0159877	1.11856e-06	0.266457	0.326923	0.0242342	1.18057e-10	0.439224	0.344444	0.0284723	1	0.534128	0.333333	0.0886635	1	2.20087	0.592593	0.193347	0.000570688	6.06868	0.866667	0.261173	6.44727e-22	9.03356	0.980769	0.205677	5.99254e-10	6.58511	0.977778	0.154125	6.89636e-08	4.50346	0.957746	0.100528	0.35361	2.58546	0.975309	0.0911948	1	2.28157	0.983051	0.0288334
mcm8	0.0232822	3.47638e-05	0.302131	0.339623	0.027133	1	0.363705	0.486486	0.0473092	1	0.720067	0.634615	0.0654601	1	1.08111	0.555556	0.0871225	1	1.55388	0.583333	0.108225	1	2.05292	0.654321	0.187747	0.308266	4.21508	0.8	0.258817	6.4856e-18	6.44477	0.942308	0.182839	0.000839289	4.07037	0.911111	0.119953	1	2.34516	0.859155	0.0703795	1	1.18469	0.851852	0.04804	1	0.733919	0.644068	0.036653
si:ch211-199b20.3	0.0262603	0.186713	0.196521	0.264151	0.0401424	1	0.33032	0.432432	0.0580587	1	0.522709	0.557692	0.048988	1	0.422772	0.344444	0.0505522	1	0.439648	0.291667	0.0999432	1	1.04168	0.37037	0.194799	1	2.48796	0.622222	0.256632	1.24603e-11	3.58291	0.846154	0.166557	1	2.02403	0.644444	0.126015	1	1.40562	0.732394	0.0827218	1	0.817708	0.765432	0.0642823	1	0.594066	0.610169	0.0357683
CCNB1IP1	0.0492749	1	2.06894	0.849057	0.0446866	1	1.8324	0.864865	0.0351509	1	1.36286	0.826923	0.0165298	3.10476e-28	0.546842	0.411111	0.0337343	1	1.29581	0.625	0.0486913	0.0366766	2.03849	0.654321	0.14072	0.248547	7.88487	0.955556	0.254652	4.03246e-31	17.2295	1	0.235584	3.24417e-23	15.5427	1	0.144729	1.46655e-08	8.1796	0.985915	0.114264	0.000596383	6.01492	1	0.0788542	1	3.73777	1	0.0431033
stag3	0.0435653	1	0.293807	0.358491	0.0312809	1	0.195493	0.27027	0.0315302	1	0.197399	0.25	0.0272979	0.00119156	0.165596	0.144444	0.0815943	1	0.645958	0.291667	0.172571	0.491769	1.70482	0.567901	0.257181	9.30892e-06	2.88845	0.711111	0.253885	1.5779e-12	2.83956	0.846154	0.162412	1	1.57413	0.644444	0.0575306	1	0.415417	0.380282	0.0507293	1	0.354974	0.395062	0.0307636	1	0.191552	0.355932	0.0198403
fn1b	0.0131944	0.00110133	0.102584	0.150943	0.017112	1	0.139817	0.243243	0.0306135	1	0.282301	0.423077	0.0265679	0.000202158	0.237557	0.211111	0.0378792	1	0.366513	0.208333	0.145105	1	2.01344	0.506173	0.213285	0.000176739	3.34273	0.777778	0.252328	3.81189e-16	4.17576	0.923077	0.246423	1.38402e-09	4.04689	0.866667	0.104342	1	1.31229	0.661972	0.0479429	1	0.490541	0.506173	0.0377078	1	0.364474	0.474576	0.0408079
adipor2	0.0437944	1	0.796218	0.622642	0.0624751	1	1.24049	0.810811	0.096855	1	2.16555	0.903846	0.0417656	2.18511e-08	0.750834	0.388889	0.0350342	1	0.604702	0.291667	0.0655414	0.463322	1.31764	0.45679	0.141691	1	3.5445	0.644444	0.250925	3.99393e-31	7.52763	1	0.183343	4.31857e-10	4.9712	1	0.0940069	1	2.08419	0.788732	0.0760546	1	1.59049	0.888889	0.060133	1	1.18232	0.864407	0.0700671
terb2	0.031986	0.610089	0.329074	0.339623	0.0707247	1	0.882518	0.810811	0.0582522	1	0.691194	0.596154	0.063553	1	0.771121	0.511111	0.0255463	1	0.250272	0.208333	0.134926	1	2.02309	0.62963	0.169417	1	2.72564	0.733333	0.250897	1.48319e-16	4.57904	0.923077	0.221253	1.03937e-10	3.87692	0.933333	0.0997555	1	1.3684	0.71831	0.0603436	1	0.722478	0.62963	0.0354802	1	0.373651	0.40678	0.0238034
rab36	0.144291	0.000984217	2.07597	0.924528	0.0992212	1	1.27756	0.837838	0.0697545	1	0.815271	0.711538	0.0415747	0.0609512	0.427004	0.3	0.0380234	1	0.382471	0.166667	0.101058	1	1.30805	0.493827	0.163831	1	2.45186	0.644444	0.250279	3.3147e-17	4.29066	0.923077	0.190449	5.29029e-05	2.98943	0.866667	0.0879174	1	1.09409	0.605634	0.0230678	0.000172911	0.207939	0.296296	0.0265236	0.132758	0.246243	0.305085	0.0223264
si:ch211-239j9.1	0.0281681	0.00012783	0.539654	0.528302	0.0388337	1	0.799605	0.72973	0.0375878	1	0.768131	0.75	0.043515	0.000106451	0.920306	0.555556	0.0587312	1	1.33728	0.583333	0.14012	1	4.06983	0.839506	0.193174	1.43028e-05	6.20484	0.933333	0.247324	5.34499e-23	8.60385	0.980769	0.188281	4.11585e-10	5.99825	1	0.112696	1	3.06672	0.901408	0.0771188	1	1.88597	0.888889	0.0550739	1	1.2338	0.864407	0.0308863
syce2	0.0280023	0.264096	0.887838	0.698113	0.0371649	1	1.25524	0.837838	0.0395912	1	1.35692	0.807692	0.0526998	1	1.93495	0.8	0.0601495	1	2.28332	0.791667	0.135538	1.51345e-06	6.45772	0.962963	0.16522	1.69473e-05	8.3685	0.977778	0.247084	3.1212e-27	14.2387	1	0.243888	4.36985e-19	13.9954	0.977778	0.135769	0.347288	6.47207	0.915493	0.0460831	1	1.63735	0.814815	0.0208139	1.5796e-06	0.620041	0.627119	0.0165759
dub	0.103287	1	1.31553	0.792453	0.0725624	1	0.838056	0.756757	0.0822064	1	0.982009	0.692308	0.0608603	1	0.67131	0.466667	0.0940106	1	1.1657	0.541667	0.117908	1	1.56089	0.530864	0.235876	1.53439e-05	3.87906	0.777778	0.241586	5.41e-13	4.00388	0.865385	0.14947	1	2.12586	0.777778	0.0449427	1	0.45982	0.338028	0.0295114	0.0472629	0.274185	0.320988	0.0180005	0.00352647	0.15088	0.254237	0.0180342
xpr1b	0.0575931	1	0.460662	0.433962	0.038545	1	0.279703	0.405405	0.0487074	1	0.373687	0.461538	0.0722297	1	0.612739	0.455556	0.0951749	1	0.870912	0.458333	0.17432	1	1.91314	0.604938	0.189207	1	2.13134	0.666667	0.24147	2.10045e-08	2.94263	0.807692	0.103318	1	0.967825	0.444444	0.0620013	1	0.505351	0.352113	0.0559195	1	0.443958	0.469136	0.0583006	1	0.467767	0.576271	0.0590252
spata22	0.0106889	1.96336e-23	0.493074	0.490566	0.0166325	1.40205e-05	0.833291	0.783784	0.0307858	0.397447	1.75257	0.923077	0.0479641	1	3.02623	0.877778	0.0583763	1	3.86756	0.708333	0.103193	1	7.97671	0.950617	0.168975	6.06709e-08	15.1584	1	0.241186	7.75302e-31	24.2525	1	0.229788	1.78758e-22	22.7469	1	0.125094	0.0341949	10.2314	0.985915	0.0939016	1	7.06599	0.975309	0.0780004	1	5.576	1	0.0495512
ppl	0.0493182	1	0.617352	0.54717	0.0478832	1	0.595086	0.540541	0.0308376	0.808502	0.346064	0.423077	0.0533266	0.000126322	0.680533	0.333333	0.0464562	1	0.573133	0.291667	0.136481	1	2.25824	0.617284	0.180801	1	3.26525	0.733333	0.239545	2.22317e-14	4.73612	0.923077	0.177264	1.70387e-05	3.18135	0.955556	0.0825169	1	1.18038	0.633803	0.0668096	1	0.903113	0.654321	0.0661807	1	0.892404	0.694915	0.0810006
mier2	0.0329679	0.30718	0.387594	0.377358	0.0367965	1	0.443528	0.540541	0.0300527	0.261063	0.34613	0.403846	0.0672667	1	0.94022	0.588889	0.103246	1	1.6235	0.708333	0.138062	1	2.36617	0.617284	0.19326	1	3.67994	0.755556	0.236836	9.72258e-15	4.81541	0.923077	0.187704	0.0111057	3.54097	0.822222	0.0716422	1	1.01818	0.619718	0.0633917	1	0.87247	0.765432	0.0455648	1	0.577514	0.661017	0.0544947
m1ap	0.0662472	1	0.972059	0.679245	0.0413587	1	0.539908	0.648649	0.0456617	1	0.610294	0.615385	0.019824	1.58237e-12	0.220453	0.211111	0.0587408	1	0.835599	0.5	0.0753446	1	1.1439	0.37037	0.165463	1	3.16108	0.755556	0.235325	1.59063e-17	5.0325	0.961538	0.269548	1.09156e-17	6.02314	0.955556	0.140694	3.8738e-05	2.55613	0.887324	0.0591395	1	0.842722	0.716049	0.0353496	1	0.444988	0.559322	0.0281632
afap1l1b	0.109259	1	2.40903	0.90566	0.0798306	1	1.61125	0.918919	0.0792817	1	1.59717	0.865385	0.0538027	0.653342	0.979749	0.577778	0.0548223	1	1.00301	0.625	0.120265	1	2.72756	0.654321	0.160318	1	3.969	0.844444	0.234348	1.66743e-15	6.55019	0.923077	0.150953	1	3.66785	0.866667	0.0466257	0.0241877	0.819715	0.521127	0.0568648	1	1.05	0.728395	0.0573051	1	1.0602	0.728814	0.0738775
phf20l1	0.0403712	0.0521054	0.522653	0.490566	0.061252	1	0.878376	0.702703	0.0720366	1	1.07778	0.826923	0.0964469	1	1.5635	0.744444	0.0590761	1	0.839372	0.416667	0.132863	1	2.36591	0.728395	0.13548	1	2.42683	0.577778	0.232756	3.18307e-05	4.94684	0.826923	0.150785	1	2.79106	0.844444	0.0858024	1	1.34612	0.661972	0.0963036	1	1.56052	0.888889	0.081244	1	1.25562	0.864407	0.0623921
postnb	0.0164075	4.21864e-05	0.203325	0.226415	0.020724	1	0.269029	0.351351	0.0241685	0.0459982	0.323881	0.326923	0.036906	2.1704e-06	0.542789	0.288889	0.0394914	1	0.589989	0.25	0.0601521	1	0.995935	0.395062	0.174103	1	3.91017	0.733333	0.231371	1.73796e-12	5.69287	0.923077	0.235694	1.99272e-13	5.83413	0.977778	0.183825	1.53406e-11	4.20034	0.929577	0.104833	0.105693	2.01884	0.925926	0.075167	1	1.31941	0.813559	0.0325611
dync2li1	0.0939295	1	0.836626	0.698113	0.0834823	1	0.719554	0.72973	0.048283	1	0.361139	0.461538	0.0316531	3.0241e-06	0.21459	0.177778	0.0168581	1	0.100226	0.0833333	0.114565	1	1.08049	0.444444	0.193995	1	2.15213	0.555556	0.230776	8.90472e-10	2.70759	0.826923	0.207978	0.00460789	2.35945	0.755556	0.0856877	1	0.743892	0.492958	0.0417413	1	0.301497	0.382716	0.0386167	1	0.273895	0.423729	0.0653092
gnai1	0.0681989	1	0.862652	0.679245	0.0821675	1	1.09265	0.864865	0.0882154	1	1.19631	0.788462	0.0971898	1	1.35441	0.688889	0.0666276	1	0.837641	0.458333	0.157022	1	2.52471	0.703704	0.173117	1	2.87004	0.688889	0.230756	7.898e-16	4.19508	0.961538	0.174921	1	2.90947	0.755556	0.0551481	1	0.660529	0.450704	0.0394495	1	0.435725	0.518519	0.0348151	1	0.373641	0.474576	0.0202986
mindy3	0.0191934	3.3517e-10	0.497323	0.490566	0.0154741	5.7831e-07	0.384355	0.459459	0.0230608	0.000434604	0.620359	0.692308	0.0386073	5.52277e-07	1.1631	0.6	0.0531301	1	1.72827	0.625	0.096399	1	3.6741	0.864198	0.180474	3.37262e-05	8.31083	0.955556	0.230047	4.05258e-25	11.4532	1	0.226461	1.21472e-19	11.2175	1	0.134628	0.000246518	5.65973	0.971831	0.09811	1	3.75805	0.975309	0.0744174	1	2.6409	0.983051	0.0522538
spdya	0.0144136	5.1063e-18	0.662712	0.641509	0.0188111	1.75613e-05	0.910877	0.810811	0.0286447	0.00386638	1.51413	0.884615	0.0362278	1.7695e-10	2.01804	0.766667	0.0593477	1	3.72469	0.833333	0.0963803	1	6.89208	1	0.160379	5.57185e-06	13.3515	1	0.230002	1.67765e-32	21.4843	1	0.210631	2.35138e-20	19.1231	1	0.138516	2.95189e-08	11.0212	1	0.0985402	1	7.09106	0.987654	0.0774048	1	5.20901	0.983051	0.0524246
pcm1	0.0460257	1	2.41858	0.867925	0.0480407	1	2.55081	0.972973	0.0423749	1	2.1832	0.961538	0.0684108	1	3.9724	0.933333	0.0992724	1	6.38402	1	0.1422	1.88177e-05	10.171	0.962963	0.193235	3.96801e-15	15.2174	1	0.229451	1.33861e-27	19.0983	1	0.207161	1.2565e-16	16.6829	1	0.0820901	1	5.00583	0.971831	0.0444647	0.298356	2.31727	0.901235	0.0342018	0.240223	1.67688	0.949153	0.0288198
si:ch211-199g17.9	0.0388348	1	1.33333	0.792453	0.0621293	1	2.39305	0.945946	0.0440987	1	1.56008	0.769231	0.0220989	7.29565e-18	0.670631	0.444444	0.0212833	0.0396883	0.640909	0.375	0.0546477	1	2.03739	0.716049	0.118499	1	5.45693	0.911111	0.228752	1.5938e-21	12.9377	1	0.279761	4.98695e-32	16.886	1	0.175727	6.61808e-13	9.13221	0.971831	0.101947	0.0504199	4.49328	1	0.0669184	1	2.62771	0.983051	0.0245734
pcp4l1	0.0815435	1	4.21992	0.981132	0.0592011	1	2.81526	0.972973	0.0569477	1	2.68156	0.961538	0.0464209	7.98813e-08	2.07823	0.833333	0.0522275	1	2.40661	0.791667	0.105148	1	5.84469	0.938272	0.145911	0.0035145	8.94353	1	0.227579	9.07971e-31	16.0623	1	0.197809	1.98726e-16	13.3438	1	0.121571	1	7.05122	0.985915	0.0915877	1	4.8947	1	0.0767573	1	3.90748	0.983051	0.0355895
si:dkey-27p23.3	0.0999682	1	1.44353	0.830189	0.113115	1	1.69285	1	0.079716	1	1.08065	0.730769	0.0327048	8.72742e-06	0.355734	0.288889	0.0237705	1	0.241294	0.166667	0.0600011	0.139922	0.754648	0.283951	0.0929866	1	1.31543	0.444444	0.225709	1.1407e-08	4.18766	0.846154	0.269327	3.22208e-22	5.29086	0.977778	0.113838	1	1.70686	0.690141	0.0586191	1	0.732898	0.654321	0.0478367	1	0.568607	0.474576	0.0324992
si:ch211-286b5.2	0.125973	1	4.12449	0.981132	0.0824199	1	2.38927	0.972973	0.0792507	1	2.27294	0.980769	0.0686742	1	1.89553	0.766667	0.0764736	1	2.17221	0.791667	0.127305	1	4.18128	0.839506	0.159338	0.740468	5.60579	0.911111	0.225196	2.60486e-22	8.84712	0.980769	0.157822	0.000200995	5.53594	0.977778	0.0775657	1	2.21168	0.802817	0.0575827	1	1.51869	0.864198	0.0477539	1	1.20231	0.813559	0.0241323
lrriq1	0.0902742	1	1.18415	0.735849	0.0755476	1	0.943737	0.675676	0.0515223	1	0.583112	0.596154	0.0616358	1	0.729818	0.411111	0.0733516	1	0.909085	0.458333	0.140974	1	2.10712	0.666667	0.128272	1	1.86315	0.6	0.223941	1.91918e-06	3.87485	0.826923	0.195317	7.94803e-05	3.23386	0.888889	0.116445	1	1.64335	0.704225	0.0507224	1	0.571847	0.530864	0.0474854	1	0.52679	0.576271	0.0532513
cpne2	0.0673953	1	1.65882	0.811321	0.0772976	1	1.97328	0.891892	0.064623	1	1.57324	0.884615	0.0412243	5.2338e-11	0.897972	0.522222	0.0659906	1	1.61532	0.625	0.0777598	1	1.98829	0.641975	0.158499	1	4.98892	0.866667	0.223651	4.97882e-27	7.85639	1	0.173377	3.07994e-08	5.61317	1	0.0785912	1	2.01535	0.830986	0.0721738	1	1.80889	0.938272	0.0904786	1	2.412	0.915254	0.098088
cplane2	0.0526607	1	0.919637	0.698113	0.0328386	1	0.513003	0.567568	0.0550317	1	0.971663	0.75	0.0649043	1	1.19531	0.6	0.0775251	1	1.49665	0.75	0.15485	0.0174287	3.6564	0.839506	0.19737	2.79169e-07	5.032	0.933333	0.22259	1.08624e-15	5.89928	0.942308	0.153992	0.0574086	3.62985	0.933333	0.0536212	1	0.940632	0.577465	0.0523554	1	0.912986	0.716049	0.0615776	1	1.11872	0.847458	0.0545955
neb	0.0429602	1	0.678505	0.509434	0.0530397	1	0.881733	0.756757	0.0392122	1	0.606157	0.519231	0.0397902	0.000354897	0.617196	0.377778	0.0414153	1	0.648464	0.333333	0.0706813	1	1.26493	0.419753	0.0970604	1	1.89501	0.422222	0.22258	0.000252951	5.60538	0.826923	0.229031	1.0815e-07	5.82142	0.888889	0.176488	2.07762e-06	4.1259	0.859155	0.10885	1	2.19639	0.802469	0.0774415	1	1.42023	0.728814	0.0752097
sfr1	0.0360266	1	0.786169	0.679245	0.0715611	1	1.84962	0.945946	0.0574045	1	1.40126	0.846154	0.0708514	1	1.82644	0.744444	0.0734737	1	1.91245	0.708333	0.151082	0.000352598	4.84269	0.901235	0.161502	0.299187	5.28521	0.888889	0.220829	2.18147e-15	7.98513	0.961538	0.186301	2.06844e-10	6.37828	1	0.0844679	1	2.28345	0.830986	0.040284	0.00107907	0.902089	0.641975	0.0325866	0.0268493	0.695144	0.661017	0.03669
mpp1	0.0852992	1	0.904143	0.698113	0.0441549	1	0.39513	0.432432	0.0272738	0.354512	0.218791	0.326923	0.0468487	0.013205	0.425249	0.311111	0.0901547	1	0.970426	0.541667	0.122442	1	1.43976	0.493827	0.18263	1	2.42956	0.622222	0.220733	1.55785e-06	3.1207	0.807692	0.183584	0.0256914	2.44631	0.8	0.074672	1	0.763339	0.521127	0.0656554	1	0.648705	0.641975	0.0636525	1	0.623872	0.694915	0.0679761
smc3	0.0284755	2.00925e-23	2.65145	0.90566	0.0474159	0.936661	4.96376	0.972973	0.0810676	1	9.74417	1	0.0914094	1	11.3585	0.988889	0.0929893	1	11.6105	1	0.137242	9.23106e-08	19.2063	1	0.16361	5.22961e-08	24.1743	1	0.218621	7.72216e-34	35.4326	1	0.172341	4.13899e-09	25.8843	1	0.0742395	1	8.71352	1	0.0664655	1	7.57597	1	0.0616858	1	6.89639	0.983051	0.0593339
msh4	0.0112905	1.54723e-07	0.10947	0.132075	0.012419	0.00696898	0.122523	0.189189	0.0189399	0.176797	0.202616	0.365385	0.0122866	1.29137e-16	0.120978	0.122222	0.010943	0.123252	0.105504	0.0833333	0.0338961	1.76493e-06	0.410329	0.197531	0.0860678	1	1.31551	0.377778	0.218055	1.84647e-09	4.41693	0.923077	0.271215	2.31402e-16	5.89542	0.955556	0.169328	5.04948e-11	3.16351	0.957746	0.159183	1.22816e-13	2.91691	0.987654	0.142087	1.81349e-05	2.51376	0.983051	0.061329
si:dkeyp-72h1.1	0.0469247	1	0.648864	0.528302	0.0503046	1	0.707504	0.675676	0.0418621	1	0.56327	0.519231	0.0187388	1.31335e-12	0.21177	0.211111	0.0415372	1	0.557872	0.375	0.0785644	1	1.23987	0.37037	0.16415	1	3.21509	0.733333	0.215891	6.69104e-12	4.61468	0.923077	0.268323	9.06135e-21	6.15334	1	0.156133	0.00068798	3.0106	0.84507	0.0721868	1	1.11359	0.777778	0.0580259	1	0.845734	0.677966	0.0425207
kalrnb	0.071244	1	1.60992	0.830189	0.065523	1	1.44839	0.864865	0.0698007	1	1.56878	0.884615	0.0814175	1	1.9072	0.755556	0.119757	1	3.13145	0.833333	0.103265	1	2.58581	0.728395	0.172589	1	5.04808	0.844444	0.215472	3.3228e-13	6.76602	0.942308	0.186981	1.47091e-06	5.60992	0.977778	0.0875224	1	2.09147	0.788732	0.0523361	1	1.09264	0.814815	0.0387879	1	0.753602	0.728814	0.0344151
ndel1a	0.0914604	1	1.85661	0.924528	0.109932	1	2.35211	1	0.096459	1	1.98769	0.942308	0.0598376	1	1.08421	0.6	0.0694877	1	1.30893	0.583333	0.10494	1	2.21524	0.679012	0.124475	1	2.76276	0.688889	0.213555	4.19183e-12	5.61075	0.923077	0.201172	1.27944e-05	5.18469	0.911111	0.10228	1	2.14319	0.760563	0.0642119	1	1.1848	0.679012	0.0305866	0.0385175	0.47254	0.59322	0.0248971
arhgap4a	0.0676771	1	0.75716	0.584906	0.0737498	1	0.844106	0.810811	0.0505421	1	0.525007	0.538462	0.0628197	1	0.689317	0.422222	0.0761966	1	0.879788	0.458333	0.12163	1	1.60349	0.567901	0.177524	1	2.6292	0.6	0.213415	1.94308e-05	3.35275	0.807692	0.179785	0.0439246	2.67341	0.822222	0.0777338	1	0.902393	0.549296	0.0675781	1	0.755762	0.679012	0.0609511	1	0.663635	0.728814	0.05245
smc1b	0.0649756	1	8.98147	0.962264	0.0641496	1	8.83788	1	0.0700615	1	9.87787	1	0.0843959	1	12.5123	0.977778	0.102135	1	15.977	0.958333	0.135629	3.53702e-09	23.0714	1	0.186117	4.89257e-17	34.9426	1	0.213335	1.20776e-32	41.8467	1	0.174765	2.31382e-12	32.162	1	0.0725798	1	10.3294	1	0.0481703	0.00462664	6.17527	1	0.0417605	0.000872382	5.17338	1	0.0387886
hmgb1b	0.0618872	1	14.2461	1	0.0489485	1	10.6239	1	0.0549221	1	12.2651	1	0.0712932	1	17.0298	1	0.0702284	1	16.7086	1	0.136962	7.62351e-10	39.4078	1	0.177105	3.45991e-13	55.1976	1	0.213076	4.42814e-33	70.4585	1	0.196723	2.92214e-19	63.4006	1	0.115971	1	31.7463	1	0.0708277	1	16.8892	0.987654	0.0467965	0.0373957	10.0464	1	0.0255323
bbip1	0.0498337	1	2.27984	0.943396	0.0792053	1	4.08436	0.972973	0.0902815	1	4.8266	1	0.0651849	1	3.19159	0.922222	0.0636427	1	3.09677	0.791667	0.102462	1	5.67789	0.876543	0.1387	0.203632	8.40726	1	0.21227	8.20903e-25	14.7125	1	0.181476	5.31105e-12	11.9618	1	0.115164	1	6.6023	0.929577	0.0721612	1	3.62904	0.975309	0.0623573	1	3.01827	0.983051	0.0490741
senp2	0.0543326	1	1.77615	0.867925	0.0487568	1	1.55179	0.837838	0.0586804	1	1.95589	0.923077	0.0636362	0.529381	2.16567	0.811111	0.0946968	1	3.58877	0.916667	0.103139	1	4.00506	0.851852	0.171743	0.0745041	7.7806	0.911111	0.212155	2.13526e-21	10.2829	0.980769	0.169912	1.76921e-07	7.67164	1	0.111678	1	4.43781	0.971831	0.0747382	1	2.65365	0.962963	0.0599498	1	2.00913	0.949153	0.0614372
stag1b	0.0416401	0.0563888	1.00786	0.716981	0.0513677	1	1.30794	0.918919	0.0556263	1	1.44477	0.807692	0.0844213	1	2.44725	0.844444	0.0944734	1	2.82597	0.916667	0.158657	0.655002	5.53767	0.876543	0.185723	1	6.81268	0.777778	0.21079	2.57098e-13	8.05272	0.961538	0.099267	1	3.01137	0.755556	0.0739894	1	2.06935	0.746479	0.0890507	1	2.61994	0.975309	0.0775759	1	2.19748	0.915254	0.073622
serpinh2	0.0623222	1	0.499667	0.490566	0.0526229	1	0.404226	0.567568	0.0439122	1	0.322777	0.384615	0.02754	2.10639e-06	0.18209	0.188889	0.0567067	1	0.443824	0.291667	0.102647	1	0.942805	0.382716	0.142952	1	1.44881	0.488889	0.210668	3.55365e-07	2.41304	0.807692	0.233947	6.34382e-08	2.77206	0.822222	0.106951	1	0.994061	0.521127	0.0681379	1	0.559132	0.530864	0.06816	1	0.559361	0.627119	0.0528283
e2f5	0.0724561	1	7.2361	0.981132	0.016318	4.11376e-10	1.16065	0.72973	0.014882	1.92481e-16	1.03991	0.788462	0.0352246	5.01194e-14	2.94507	0.766667	0.0363561	1	3.06169	0.916667	0.14768	3.52067e-11	18.1019	1	0.183875	6.88478e-12	24.1427	1	0.209897	1.09929e-26	28.754	1	0.20611	8.17291e-21	28.0701	1	0.124899	0.000612742	14.55	1	0.0866232	1	9.08124	1	0.0688879	1	6.78827	1	0.050496
clip2	0.0685477	1	1.04015	0.735849	0.0551478	1	0.79132	0.783784	0.0435181	1	0.589316	0.653846	0.0682496	1	1.03444	0.577778	0.0937476	1	1.54925	0.625	0.132459	1	2.42167	0.691358	0.176421	1	3.525	0.755556	0.20796	1.65397e-08	4.37955	0.903846	0.170613	0.382725	3.37308	0.888889	0.103392	1	1.75695	0.760563	0.0740013	1	1.14597	0.740741	0.0549094	1	0.787044	0.79661	0.05572
C7H4orf48	0.10841	1	1.59106	0.849057	0.0562788	1	0.691472	0.648649	0.0482123	1	0.570086	0.538462	0.0425839	5.53898e-07	0.488736	0.344444	0.0750323	1	0.993531	0.458333	0.134599	1	2.10656	0.617284	0.179602	1	3.07447	0.733333	0.206647	3.81322e-10	3.69983	0.923077	0.135223	1	2.11929	0.822222	0.102595	1	1.48191	0.676056	0.0750594	1	0.993986	0.703704	0.0890523	1	1.23577	0.881356	0.0573188
cenpp	0.0855881	1	2.43121	0.943396	0.0340315	0.177797	0.767506	0.648649	0.0574289	1	1.46784	0.884615	0.0502346	1.47404e-05	1.2418	0.611111	0.0687704	1	1.84147	0.708333	0.121801	1	3.82864	0.814815	0.192811	8.75626e-07	6.98743	0.933333	0.206557	2.97237e-17	7.653	0.980769	0.173727	1.02168e-05	6.09044	0.977778	0.103706	1	3.10988	0.901408	0.0699643	1	1.88197	0.938272	0.0605675	1	1.56918	0.898305	0.0438906
zgc:111976	0.0733714	1	0.98742	0.716981	0.0710903	1	0.948707	0.783784	0.0787533	1	1.08025	0.788462	0.0765604	1	1.04218	0.533333	0.079687	1	1.09657	0.625	0.107154	1	1.60252	0.592593	0.175781	1	3.05574	0.755556	0.205969	1.24535e-05	3.76653	0.826923	0.115577	1	1.76714	0.755556	0.0746764	1	1.00974	0.56338	0.0498872	1	0.608198	0.567901	0.0409783	1	0.476528	0.576271	0.0548546
si:ch211-176l24.4	0.0700776	1	3.7704	1	0.0608189	1	3.15368	1	0.0709322	1	3.82865	0.980769	0.0781089	1	4.32638	0.944444	0.0874091	1	4.99325	1	0.123394	1	7.78493	0.950617	0.162682	2.058e-07	11.1693	1	0.205565	9.41019e-29	15.2038	1	0.171313	4.12941e-10	11.9547	1	0.110621	1	6.75762	1	0.0626923	1	3.27629	0.987654	0.0523255	0.0533265	2.61227	0.966102	0.0477544
zgc:92107	0.0368155	0.0111233	0.647809	0.679245	0.050413	1	0.955891	0.864865	0.0704159	1	1.45407	0.884615	0.1157	1	2.7451	0.855556	0.126758	1	3.09018	0.791667	0.155358	1	4.03027	0.839506	0.14094	1	3.54806	0.8	0.20485	1.90632e-09	5.80104	0.923077	0.131053	1	3.22704	0.888889	0.0807491	1	1.72998	0.802817	0.0760547	1	1.60316	0.876543	0.0711368	1	1.47293	0.881356	0.0504328
si:ch211-66i15.4	0.105925	1	1.48904	0.773585	0.0969967	1	1.32956	0.891892	0.0372336	0.729674	0.399351	0.403846	0.0501764	0.000108699	0.577747	0.344444	0.0464426	1	0.524775	0.291667	0.140293	1	2.14415	0.641975	0.18605	1	3.10583	0.644444	0.204511	5.27391e-08	3.51908	0.884615	0.104037	1	1.45494	0.666667	0.0669472	1	0.829365	0.507042	0.0676305	1	0.840064	0.703704	0.0799939	1	1.03926	0.79661	0.0925292
si:ch211-241j8.2	0.0456031	1	0.962765	0.754717	0.0628028	1	1.436	0.891892	0.0382636	1	0.775036	0.615385	0.0492607	0.018401	1.05964	0.544444	0.0475099	1	1.013	0.541667	0.121378	1	3.33256	0.790123	0.152635	1	4.49289	0.777778	0.204479	0.00506858	6.60268	0.846154	0.220661	1.66666e-16	7.30246	1	0.152442	0.00196952	4.48545	0.915493	0.0918243	1	2.32578	0.839506	0.0633682	1	1.45229	0.79661	0.0413888
si:ch211-71m22.1	0.149394	0.00133002	2.65704	0.90566	0.134413	1	2.31452	0.891892	0.099353	1	1.56516	0.865385	0.0416148	1	0.522859	0.4	0.0313138	1	0.368656	0.166667	0.0765019	1	1.12084	0.432099	0.141813	1	2.48215	0.733333	0.204476	2.1607e-07	4.01597	0.846154	0.214192	1.50142e-08	4.27023	0.888889	0.0691191	1	0.985632	0.535211	0.0185515	2.28032e-08	0.195651	0.259259	0.0216555	0.050201	0.235646	0.372881	0.0285416
tkta	0.0747779	1	0.775884	0.622642	0.0844358	1	0.90552	0.783784	0.0949234	1	1.05181	0.730769	0.0591759	1	0.577545	0.422222	0.0886484	1	0.963609	0.416667	0.127405	1	1.53817	0.555556	0.188793	1	2.57534	0.644444	0.204295	1.37248e-05	2.85822	0.826923	0.138792	1	1.71962	0.733333	0.0555854	1	0.533976	0.380282	0.0419461	1	0.376232	0.444444	0.0558997	1	0.537758	0.525424	0.086327
lin9	0.113197	1	3.06184	0.943396	0.0649535	1	1.50669	0.864865	0.0777565	1	1.89189	0.923077	0.0790112	1	1.93078	0.788889	0.0763991	1	1.85004	0.833333	0.121119	1	3.34218	0.802469	0.140525	1	4.05537	0.755556	0.203653	4.96298e-15	6.60467	0.980769	0.141864	1	4.10589	0.911111	0.0830579	1	2.05754	0.873239	0.0676166	1	1.58502	0.91358	0.0635825	1	1.46675	0.864407	0.0578536
r3hdml	0.0186055	2.30428e-10	0.260041	0.283019	0.0364771	1	0.588706	0.621622	0.036646	1	0.592058	0.653846	0.0491391	0.0011464	0.851034	0.477778	0.075208	1	1.45274	0.625	0.0688882	1	1.29994	0.518519	0.151521	1	3.58497	0.688889	0.203648	3.21388e-12	5.29061	0.980769	0.200232	6.55551e-09	5.17367	0.955556	0.15556	8.91669e-05	3.71069	0.929577	0.112949	1	2.44578	0.91358	0.111983	1	2.41877	0.966102	0.0663159
polr3glb	0.0999197	1	2.48958	0.943396	0.0705184	1	1.59629	0.891892	0.0995319	1	2.47716	0.961538	0.0887111	1	2.13733	0.766667	0.0708177	1	1.60487	0.708333	0.0986982	1	2.45053	0.716049	0.143083	1	3.96533	0.822222	0.20316	1.50385e-11	6.28746	0.942308	0.172615	0.0130689	5.07161	0.933333	0.0979802	1	2.42765	0.901408	0.0726186	1	1.65671	0.91358	0.0577829	1	1.2422	0.830508	0.0382863
spoplb	0.0645589	1	1.67195	0.924528	0.0820048	1	2.26371	0.972973	0.0845518	1	2.35372	0.961538	0.0925119	1	2.64063	0.866667	0.0708213	1	1.87925	0.791667	0.13567	1	4.33151	0.876543	0.163491	0.518716	5.52913	0.911111	0.203155	7.16065e-14	7.3617	0.961538	0.144793	1	4.71563	0.933333	0.0775372	1	2.10799	0.816901	0.0517541	1	1.26727	0.91358	0.0524601	1	1.28887	0.830508	0.062375
nit1	0.0610421	1	0.796843	0.622642	0.0719138	1	0.979844	0.756757	0.0546523	1	0.693712	0.653846	0.0699141	1	0.945499	0.522222	0.0738638	1	1.01363	0.541667	0.171568	0.059763	3.01261	0.765432	0.188736	0.380177	3.41597	0.8	0.200868	3.61432e-08	3.70886	0.923077	0.137393	1	2.25188	0.777778	0.0873449	1	1.25468	0.71831	0.0551709	1	0.701955	0.666667	0.0439476	1	0.528883	0.644068	0.0406191
tfdp2	0.0559594	1	0.948668	0.716981	0.0502903	1	0.830206	0.810811	0.0545756	1	0.919413	0.769231	0.0564972	0.0301353	0.960097	0.566667	0.0456877	1	0.736818	0.333333	0.16798	1.51486e-08	3.89015	0.925926	0.179304	1	4.23891	0.733333	0.200813	1.68742e-09	4.92241	0.942308	0.148861	0.0562828	3.31994	0.955556	0.0826824	1	1.5532	0.760563	0.0494374	0.430072	0.812708	0.666667	0.0707299	1	1.27388	0.949153	0.0722768
cep131	0.0880532	1	1.34122	0.830189	0.0619587	1	0.859006	0.675676	0.0641362	1	0.897169	0.788462	0.0582908	0.0272916	0.79564	0.488889	0.0462397	1	0.595971	0.291667	0.191294	7.29295e-06	3.67888	0.839506	0.176029	1	3.29688	0.8	0.200561	0.00191875	3.91604	0.846154	0.130216	1	2.22165	0.822222	0.104115	1	1.66294	0.746479	0.0793497	1	1.17455	0.82716	0.0602609	1	0.829531	0.779661	0.0505587
chchd3b	0.0312146	0.101973	0.296222	0.358491	0.0388203	1	0.387088	0.459459	0.0342523	1	0.331878	0.442308	0.0578032	1	0.634847	0.444444	0.0688027	1	0.790455	0.416667	0.136398	1	1.90301	0.481481	0.186315	0.339766	2.86504	0.777778	0.200161	0.00326958	3.14941	0.807692	0.169892	1	2.53716	0.755556	0.106976	1	1.3886	0.71831	0.0939025	1	1.17431	0.765432	0.0728276	1	0.849405	0.779661	0.0699098
eno4	0.0217847	1	0.0623199	0.113208	0.0303812	1	0.0932905	0.108108	0.0120705	1	0.0307922	0.0384615	0.0105045	0.0190885	0.0261325	0.0333333	0	1	0	0	0.0330516	1	0.10341	0.0493827	0.131053	1	0.58802	0.244444	0.235442	0.000254775	1.27079	0.538462	0.394715	1.20247e-22	2.50164	0.844444	0.13058	1	0.585261	0.366197	0.0518849	1	0.180542	0.222222	0.0259367	1	0.0769583	0.169492	0.0336549
abhd2b	0.0157023	1	0.047698	0.0754717	0.0490685	1	0.190872	0.27027	0.0352419	1	0.126792	0.211538	0.0113627	0.00291127	0.0324925	0.0333333	0.0119796	1	0.0345876	0.0416667	0.0256748	1	0.0861541	0.0493827	0.0828321	1	0.369049	0.133333	0.241099	0.00255003	1.48625	0.519231	0.387446	3.74109e-21	2.76859	0.844444	0.186628	5.80463e-07	1.05933	0.633803	0.0502389	1	0.196557	0.259259	0.0233299	1	0.0767218	0.135593	0.0128732
si:ch73-367j5.3	0.108151	1	0.963764	0.698113	0.0979232	1	0.848053	0.567568	0.0310466	1	0.201385	0.307692	0.0136726	4.25051e-07	0.0750411	0.0777778	0.0233385	1	0.142379	0.0833333	0.0420556	1	0.292412	0.135802	0.131275	1	1.23894	0.422222	0.257746	3.33852e-09	3.01169	0.730769	0.320396	6.88999e-18	4.01259	0.888889	0.0846654	1	0.703952	0.492958	0.032299	1	0.211359	0.283951	0.0358071	1	0.239835	0.372881	0.0284715
dnm3a	0.0811651	1	0.712229	0.566038	0.0560711	1	0.446517	0.432432	0.0331132	1	0.232649	0.346154	0.0288219	2.95535e-07	0.196376	0.166667	0	0.00162441	0	0	0.0687069	1	0.576545	0.296296	0.13235	1	1.33694	0.466667	0.208571	0.0233039	2.42983	0.692308	0.286746	9.24969e-20	3.70218	0.955556	0.147347	0.715481	1.53802	0.71831	0.062446	1	0.511118	0.54321	0.0508974	1	0.395657	0.508475	0.0773923
tnip2	0.0468499	1	0.256993	0.301887	0.0688818	1	0.416493	0.486486	0.0264183	1	0.127198	0.192308	0.0127314	6.20397e-10	0.0530124	0.0444444	0.0116016	1	0.0474921	0.0416667	0.056713	1	0.326142	0.160494	0.117283	1	0.822843	0.311111	0.265346	9.71989e-06	2.40621	0.653846	0.282545	2.3666e-15	2.61443	0.888889	0.106149	1	0.723318	0.478873	0.0964515	1	0.639446	0.555556	0.0712972	1	0.435046	0.559322	0.0532135
dnali1	0.0810821	1	0.515705	0.415094	0.102756	1	0.698432	0.621622	0.0171269	1	0.0759757	0.115385	0.0103447	0.000848462	0.041767	0.0444444	0	1	0	0	0.0682093	1	0.414184	0.185185	0.170604	1	1.35147	0.444444	0.317419	6.8227e-16	3.06832	0.75	0.279446	1.78514e-12	2.5943	0.8	0.0687334	1	0.418208	0.295775	0.0137961	0.0588125	0.0587126	0.0617284	0.0147493	1	0.063567	0.101695	0.0204604
pcloa	0.0607551	1	0.672851	0.528302	0.0668477	1	0.758883	0.486486	0.0172795	0.0181476	0.144318	0.211538	0.0133923	8.7316e-16	0.106525	0.0666667	0.0138397	1	0.110763	0.0833333	0.0228897	7.10215e-15	0.202344	0.037037	0.0393211	1	0.391539	0.177778	0.19165	1	2.96083	0.615385	0.277737	1.38808e-12	4.83657	0.888889	0.185422	6.15335e-09	2.83455	0.859155	0.112902	0.104023	1.48226	0.864198	0.100702	1	1.279	0.813559	0.114215
ttc29	0.0822554	1	0.688541	0.566038	0.110468	1	1.00516	0.783784	0.0376888	1	0.259202	0.384615	0.00867867	8.15849e-08	0.0445448	0.0444444	0.0267846	1	0.170723	0.0833333	0.0911844	1	0.785398	0.320988	0.172971	1	1.8041	0.511111	0.282218	7.29597e-14	3.44559	0.788462	0.269867	1.23293e-14	3.24776	0.866667	0.0656747	1	0.517634	0.394366	0.00954996	0.000258975	0.0498387	0.0987654	0.00544842	0.000770361	0.0258926	0.0508475	0.0177181
atp2b3a	0.0562977	1	0.337318	0.396226	0.0530156	1	0.312912	0.405405	0.0196098	0.0291238	0.0926426	0.134615	0.00929046	2.95798e-15	0.0381584	0.0333333	0.0312746	1	0.163067	0.125	0.0317715	9.44583e-07	0.166239	0.0864198	0.0539703	1	0.319966	0.155556	0.157344	1	1.25983	0.519231	0.269834	2.14517e-11	2.568	0.844444	0.219961	3.87143e-10	1.95944	0.788732	0.135525	0.0121683	1.03642	0.777778	0.0969813	1	0.672184	0.644068	0.0912441
tnnt3a	0.0674064	1	0.55629	0.490566	0.0753009	1	0.639989	0.621622	0.0414703	1	0.303297	0.423077	0.0522121	0.0552396	0.403722	0.266667	0.0368764	1	0.262431	0.166667	0.0511698	0.000479656	0.393694	0.185185	0.0601531	1	0.482005	0.177778	0.0541778	1	0.422792	0.192308	0.264501	3.94258e-20	3.28906	0.977778	0.170468	2.55137e-05	1.84056	0.802817	0.127524	0.209725	1.25912	0.814815	0.0960935	1	0.873576	0.745763	0.101977
ptprz1b	0.0366547	1	0.197018	0.283019	0.0261137	1	0.130212	0.189189	0.0121769	0.00597578	0.0522106	0.0961538	0.0164387	1.67857e-08	0.0745938	0.0777778	0.0429788	1	0.239756	0.166667	0.0384506	0.000240904	0.208964	0.0987654	0.104249	1	0.733679	0.288889	0.13953	1	1.07075	0.403846	0.263092	1.38048e-10	2.4701	0.822222	0.228152	1.23988e-09	2.04551	0.732394	0.111074	1	0.796228	0.679012	0.069729	1	0.439136	0.525424	0.103318
lpin2	0.0274863	1.80041e-05	0.641382	0.622642	0.0407562	1	1.03921	0.702703	0.053013	1	1.44042	0.826923	0.0390004	5.64801e-08	0.984265	0.611111	0.0627139	1	1.77813	0.875	0.0998619	1	3.21303	0.802469	0.125626	1	4.32272	0.866667	0.184875	2.0727e-09	7.16988	0.980769	0.259679	1.46321e-22	11.2371	0.977778	0.158467	2.97775e-08	5.85409	0.971831	0.0880319	1	2.73349	0.962963	0.0657201	1	1.88615	0.898305	0.0550876
C19H5orf49	0.0978476	1	1.26929	0.603774	0.0793932	1	0.97172	0.864865	0.0325571	1	0.319756	0.5	0.0257678	5.77775e-09	0.240482	0.222222	0	3.09479e-05	0	0	0.0283538	8.60283e-12	0.270116	0.123457	0.0641417	1	0.741803	0.288889	0.145892	1	2.13031	0.557692	0.258146	1.50546e-16	4.52137	0.955556	0.200246	1.61757e-10	3.23084	0.873239	0.126071	0.00579807	1.76105	0.888889	0.0881717	1	1.11075	0.762712	0.0616078
pmp22a	0.0852435	1	0.431915	0.396226	0.0782265	1	0.387153	0.486486	0.0380856	1	0.157378	0.269231	0.0688388	0.00379017	0.329248	0.0777778	0	1	0	0	0.0285541	0.000121273	0.110609	0.0493827	0.117327	1	0.651304	0.244444	0.242433	0.00912338	1.68921	0.557692	0.253027	1.43721e-12	1.78762	0.866667	0.126183	1	0.715798	0.507042	0.0533398	1	0.238977	0.320988	0.0622525	1	0.290044	0.355932	0.0598383
ccdc146	0.0662517	1	0.608203	0.584906	0.0570636	1	0.504133	0.648649	0.0348125	1	0.273216	0.346154	0.0170649	2.7698e-16	0.115242	0.111111	0.030174	1	0.229364	0.125	0.0443257	1.18037e-07	0.368016	0.160494	0.0745313	1	0.705877	0.266667	0.111674	1	1.18458	0.480769	0.250552	3.50346e-10	3.42098	0.888889	0.202596	1.75476e-11	2.58258	0.887324	0.128945	0.0162756	1.42739	0.876543	0.126986	1	1.39926	0.881356	0.110297
pimr133	0.0245134	1	0.131182	0.188679	0.0273592	1	0.14988	0.27027	0.00768519	2.05259e-05	0.0330557	0.0576923	0.0193074	9.41427e-09	0.0983718	0.0888889	0.0539364	1	0.345884	0.208333	0.0716406	1	0.494282	0.234568	0.124529	1	1.00434	0.377778	0.177039	1	1.59147	0.596154	0.246697	9.66608e-07	2.46746	0.8	0.182236	0.0056898	1.65331	0.690141	0.124628	1	1.00539	0.728395	0.140105	0.409384	1.17094	0.813559	0.056768
ccdc113	0.0413519	1	0.319206	0.339623	0.0431068	1	0.336042	0.459459	0.0407664	1	0.313634	0.326923	0.0375546	0.454411	0.283458	0.233333	0.0559197	1	0.464575	0.208333	0.12835	1	1.34107	0.530864	0.19542	1	2.32748	0.6	0.242501	5.70497e-07	3.09668	0.730769	0.246567	5.7906e-10	3.16561	0.866667	0.0878553	1	0.822596	0.450704	0.0330372	1	0.242196	0.308642	0.0314303	1	0.227866	0.389831	0.048383
tln2a	0.111743	1	1.02912	0.698113	0.112488	1	1.03799	0.756757	0.0707888	1	0.574043	0.634615	0.108974	1	0.996293	0.522222	0.0830121	1	0.702731	0.333333	0.0454412	9.34523e-07	0.329462	0.135802	0.0105109	9.17792e-09	0.0562807	0.0222222	0.0788874	1	0.658584	0.25	0.2451	2.01309e-06	2.88443	0.8	0.17006	0.0363946	1.77974	0.746479	0.0772697	1	0.641467	0.654321	0.0642148	1	0.507588	0.576271	0.0666541
mettl27	0.0549166	1	0.408584	0.339623	0.0163034	0.099566	0.09279	0.162162	0.0281598	1	0.179287	0.288462	0.0460362	0.0071266	0.327977	0.233333	0.039974	1	0.275399	0.208333	0.126252	1	1.18088	0.481481	0.126361	1	1.18222	0.333333	0.158702	1	1.59202	0.596154	0.243437	6.02799e-11	2.80009	0.888889	0.113636	1	1.03022	0.591549	0.088852	1	0.750776	0.666667	0.0900941	1	0.764227	0.779661	0.082483
si:ch211-232m8.3	0.0148967	5.08641e-07	0.123949	0.169811	0.0359411	1	0.359393	0.513514	0.0257219	0.0990367	0.238914	0.326923	0.03007	1.06068e-08	0.2889	0.233333	0.034009	1	0.335831	0.25	0.139099	1	1.99292	0.580247	0.142607	1	2.0588	0.577778	0.198687	0.0161218	3.18366	0.769231	0.242593	5.6221e-12	4.14615	0.933333	0.123371	1	1.70472	0.647887	0.110126	0.375323	1.47159	0.91358	0.0894041	1	1.12569	0.881356	0.0542172
rad21l1	0.0120313	4.12811e-18	0.335259	0.415094	0.0119099	1.38914e-11	0.331259	0.405405	0.0328112	0.500357	1.12019	0.826923	0.052607	0.199025	2.00761	0.711111	0.082924	1	3.56404	0.833333	0.0805531	1	3.43477	0.814815	0.123542	1	5.95222	0.933333	0.185931	4.87593e-15	10.1656	1	0.240483	6.21406e-30	14.2845	1	0.159948	1.80659e-10	8.33906	1	0.100209	1	4.54163	0.987654	0.0821537	1	3.52191	0.983051	0.0580845
pacrg	0.112263	1	1.97767	0.886792	0.0940389	1	1.57439	0.945946	0.0679061	1	1.04041	0.807692	0.0398541	1.2842e-08	0.535062	0.366667	0.0170485	0.000682883	0.190873	0.125	0.0543296	2.14217e-05	0.786135	0.345679	0.0699981	1	1.08107	0.333333	0.133681	1	2.4807	0.711538	0.239583	4.27878e-22	5.34625	1	0.16144	0.00334634	3.17504	0.859155	0.114973	0.178974	2.03963	0.950617	0.0777222	1	1.23446	0.830508	0.0694798
sycp1	0.016497	1.23683e-08	3.11699	0.962264	0.0390594	1	8.86495	0.972973	0.0295611	1	6.30011	1	0.0214114	1.41038e-18	4.26173	0.855556	0.0158298	0.00806644	2.96709	0.833333	0.0326422	0.0135295	7.11123	0.962963	0.0538394	1	13.2019	0.955556	0.162963	6.6634e-06	54.5961	1	0.239551	2.92491e-29	90.7883	1	0.208773	2.14625e-31	75.6816	1	0.18081	6.7834e-23	62.5949	1	0.140651	6.52249e-06	45.0214	1	0.0894525
armc4	0.0401719	1	0.299117	0.358491	0.0919041	1	0.846277	0.702703	0.0516546	1	0.408599	0.461538	0.0418216	0.000498247	0.31436	0.255556	0.0306995	1	0.215026	0.208333	0.0772864	1	0.678507	0.320988	0.123629	1	1.2405	0.444444	0.192897	0.0123096	2.22191	0.75	0.237308	8.65805e-06	2.92243	0.8	0.119015	1	1.18077	0.591549	0.096	1	0.894931	0.679012	0.0868634	1	0.787371	0.830508	0.0820262
efcab2	0.129393	0.0147158	1.89416	0.924528	0.132023	1	1.94443	0.891892	0.104467	1	1.43578	0.884615	0.0455535	0.13135	0.502916	0.366667	0.0429089	1	0.466996	0.25	0.0527226	0.0260551	0.603236	0.283951	0.103627	1	1.42093	0.488889	0.156605	1	2.43055	0.653846	0.236179	1.12382e-11	4.17929	0.911111	0.108333	1	1.50467	0.732394	0.0425213	1	0.461782	0.518519	0.0396138	0.482527	0.423101	0.372881	0.0432154
znf326	0.0700847	1	0.786418	0.716981	0.133088	1	1.79133	0.891892	0.133899	0.0510466	1.80558	0.923077	0.0295754	1.0667e-10	0.269567	0.2	0.00730345	0.00193786	0.0509508	0.0416667	0.0157496	1.78965e-19	0.126113	0.0617284	0.0323961	4.32707e-06	0.30129	0.0888889	0.0799836	1	0.929897	0.384615	0.236095	1.42634e-12	3.80835	0.933333	0.156418	0.0347651	2.21239	0.788732	0.106362	1	1.33967	0.802469	0.0852857	1	1.00915	0.813559	0.0925603
bmp8a	0.0489235	1	0.321846	0.339623	0.0405121	1	0.254744	0.351351	0.028438	1	0.16509	0.230769	0.0538608	1	0.362841	0.288889	0.0755976	1	0.556051	0.333333	0.0811118	1	0.608107	0.271605	0.149957	1	1.34482	0.422222	0.22099	2.2406e-05	2.24145	0.730769	0.235252	7.75506e-07	2.43492	0.8	0.11384	1	0.939523	0.535211	0.0646029	1	0.455838	0.493827	0.0617855	1	0.430961	0.474576	0.0847606
ribc1	0.0610229	1	0.418931	0.45283	0.0591647	1	0.402975	0.432432	0.0318352	1	0.187066	0.269231	0.0281732	0.0156717	0.161161	0.155556	0.059016	1	0.401704	0.25	0.105933	1	0.845318	0.283951	0.21194	1	2.09405	0.577778	0.196021	0.0252552	1.88872	0.653846	0.234848	1.38164e-08	2.39872	0.822222	0.0915278	1	0.70058	0.352113	0.059134	1	0.402712	0.308642	0.0815294	1	0.604371	0.440678	0.0540143
nrgna	0.156654	1	2.26319	0.773585	0.128901	1	1.7543	0.864865	0.112549	1	1.47129	0.884615	0.0317	5.54797e-06	0.299534	0.266667	0.0216919	1	0.188999	0.166667	0.0397376	5.5284e-09	0.395325	0.148148	0.0848738	1	1.02393	0.333333	0.147596	1	2.09333	0.711538	0.225398	1.26403e-08	3.65661	0.888889	0.125417	1	1.69291	0.704225	0.0947238	1	1.17834	0.740741	0.0789728	1	0.934129	0.711864	0.0456155
trim35-29	0.0294472	1	0.329432	0.358491	0.0311426	1	0.352721	0.432432	0.0247959	0.0101677	0.267328	0.25	0.0177265	3.05542e-13	0.178456	0.155556	0.0044881	0.00547696	0.0355794	0.0416667	0.0372645	4.43806e-06	0.43952	0.197531	0.0239166	1.86955e-05	0.255896	0.0888889	0.145805	1	2.47915	0.653846	0.225293	4.2911e-10	4.39755	0.911111	0.174001	4.13978e-10	3.1264	0.915493	0.11499	0.0657589	1.82035	0.876543	0.123961	0.0469216	2.00655	0.932203	0.145968
cks2	0.0304823	4.85087e-11	1.91695	0.886792	0.0367633	0.330814	2.41151	0.972973	0.0816568	1	6.54369	1	0.0745137	1	5.82502	0.9	0.0559444	1	4.05949	0.916667	0.119504	0.936999	10.6747	0.987654	0.148097	0.000618564	14.1159	1	0.192352	3.98354e-20	19.9062	1	0.222879	2.38533e-27	24.1858	1	0.110979	1	9.69968	0.985915	0.0698012	1	5.36253	1	0.0754399	1	5.91702	0.983051	0.0606635
zp3f.2	0.0236066	0.258996	0.283095	0.358491	0.0214719	1	0.252491	0.351351	0.0170053	0.000212097	0.19084	0.25	0.0131586	7.02119e-18	0.140617	0.122222	0	3.09479e-05	0	0	0.0355228	5.1822e-08	0.465747	0.185185	0.0755292	1	1.19381	0.511111	0.126674	1	2.31945	0.673077	0.222491	3.7524e-10	4.86116	0.911111	0.159076	8.1942e-08	3.12309	0.915493	0.12685	3.92077e-05	2.32364	0.91358	0.116226	0.0203542	2.07436	0.966102	0.140133
dnai1.1	0.0662226	1	0.705259	0.622642	0.089832	1	1.03887	0.675676	0.052489	1	0.526872	0.653846	0.0433006	1.52245e-06	0.414784	0.266667	0.0663609	1	0.707117	0.375	0.10813	1	1.31831	0.444444	0.149803	1	2.014	0.622222	0.171563	1	2.40638	0.730769	0.21915	7.85426e-10	3.32435	0.933333	0.127078	1	1.62498	0.774648	0.0861852	1	0.985273	0.740741	0.0841937	1	0.956313	0.762712	0.0535535
BX927362.2	0.0348616	0.0470615	0.557387	0.415094	0.0382237	1	0.624178	0.567568	0.0307298	0.273034	0.477638	0.480769	0.0624673	1	1.1502	0.533333	0.114707	1	2.49755	0.583333	0.0825383	1	1.63668	0.481481	0.143547	1	3.34339	0.733333	0.124562	1	2.7792	0.692308	0.218513	1.47016e-05	5.81291	0.911111	0.180756	1.10597e-05	4.52454	0.873239	0.107962	1	2.30942	0.938272	0.0740616	1	1.42609	0.847458	0.0940501
ttll6	0.0990709	1	1.07225	0.754717	0.10458	1	1.14958	0.810811	0.0660264	1	0.639649	0.634615	0.0626176	1	0.598336	0.433333	0.0633606	1	0.607284	0.375	0.133244	1	1.57341	0.54321	0.124988	1	1.44779	0.466667	0.172986	1	2.21465	0.634615	0.217096	0.000887196	2.98891	0.8	0.0998323	1	1.08285	0.647887	0.0624625	1	0.596471	0.592593	0.0507361	1	0.459753	0.525424	0.0544636
stra6	0.0255656	0.000144997	0.383678	0.358491	0.0274229	0.410483	0.417779	0.405405	0.028019	1	0.428849	0.576923	0.0202876	6.05342e-18	0.290197	0.233333	0.0311681	1	0.488315	0.333333	0.0572774	0.00991801	1.0365	0.37037	0.0902404	1	1.84302	0.6	0.14565	1	3.42402	0.826923	0.216335	6.39961e-10	5.76402	0.933333	0.191954	1.83139e-16	4.92145	0.971831	0.133698	2.55736e-05	3.06195	0.962963	0.132635	0.00134037	3.03028	0.966102	0.110056
atp6v1aa	0.0628852	1	0.513105	0.566038	0.0587491	1	0.471068	0.621622	0.0576131	1	0.459675	0.557692	0.0552129	1	0.435823	0.333333	0.0454327	1	0.341852	0.166667	0.087162	1	0.776171	0.320988	0.181104	1	2.00662	0.6	0.166946	1	1.80275	0.576923	0.21542	8.61974e-07	2.52343	0.822222	0.114065	1	1.09686	0.591549	0.0364677	1	0.260597	0.345679	0.0428771	1	0.318192	0.389831	0.0854046
senp6b	0.0244116	6.8947e-05	0.376051	0.377358	0.0288659	1	0.460926	0.513514	0.00938837	1.44727e-11	0.120411	0.25	0.028303	1.0448e-15	0.450005	0.255556	0.0304128	1	0.491217	0.291667	0.0886321	1	1.86691	0.592593	0.107137	1	2.38165	0.644444	0.147768	1	3.61676	0.807692	0.21504	6.75202e-18	5.9273	1	0.147392	3.2924e-05	3.60471	0.929577	0.127628	0.000110815	2.98754	0.987654	0.119437	1	2.74105	0.966102	0.10781
si:dkey-40g16.5	0.0271432	0.000818931	3.86207	0.962264	0.0353912	1	5.34031	1	0.035392	1	5.34047	1	0.0229783	1.43979e-22	3.15625	0.855556	0.0250391	0.0913694	3.50186	0.791667	0.0488698	1	7.95739	0.950617	0.091303	1	17.5114	1	0.176546	2.31405e-10	41.254	1	0.214886	2.06348e-21	53.4746	1	0.175935	4.48368e-18	41.0661	1	0.172363	3.73888e-21	39.9722	1	0.158682	8.9748e-10	35.8564	1	0.0751248
fuca2	0.0205181	1.73944e-05	0.150294	0.226415	0.0435772	1	0.376739	0.459459	0.0442728	1	0.384201	0.576923	0.0569992	1	0.526338	0.4	0.0423113	1	0.363242	0.25	0.135472	1	1.59149	0.580247	0.172474	1	2.18366	0.577778	0.158043	1	1.94682	0.653846	0.21058	2.29268e-06	2.84171	0.888889	0.143701	1	1.71883	0.746479	0.109252	1	1.20392	0.82716	0.0718182	1	0.704138	0.745763	0.0547279
zgc:152968	0.0147981	0.000494932	0.278082	0.301887	0.0174103	1	0.337624	0.378378	0.00980611	5.80619e-08	0.170896	0.173077	0.00590731	3.29775e-22	0.0945279	0.111111	0.0104206	0.140736	0.183571	0.125	0.0185911	6.16873e-12	0.365235	0.17284	0.0237418	0.0469639	0.49031	0.244444	0.123387	1	3.85557	0.769231	0.20892	6.80566e-13	7.69336	0.977778	0.191403	3.85154e-24	6.85283	1	0.138612	2.00748e-11	4.48603	0.975309	0.135836	3.14219e-08	4.3692	1	0.134751
macc1	0.0846841	1	1.03125	0.679245	0.0563115	1	0.615766	0.594595	0.03024	0.215504	0.285607	0.403846	0.0438359	5.43453e-06	0.450792	0.311111	0.0570218	1	0.625509	0.291667	0.0785877	1	0.93765	0.37037	0.10252	1	1.31746	0.377778	0.152702	1	2.21058	0.615385	0.207972	1.93495e-08	3.32029	0.933333	0.146628	1	2.0962	0.788732	0.120334	0.76389	1.62047	0.901235	0.110281	1	1.44746	0.864407	0.112691
hwa	0.0136036	7.97106e-06	0.150006	0.207547	0.0108786	0.00404662	0.115138	0.216216	0.0129036	6.79344e-07	0.140892	0.173077	0.0106769	3.34901e-18	0.112626	0.122222	0.0121824	0.0816348	0.131614	0.0833333	0.0288257	4.08625e-10	0.36994	0.160494	0.0612571	1	0.939719	0.333333	0.119906	1	2.21493	0.673077	0.207374	7.72406e-12	4.54196	1	0.203523	2.58987e-19	4.43081	1	0.151409	2.02146e-10	3.00186	0.962963	0.153408	1.2377e-06	3.05388	1	0.176079
tmf1	0.0582487	1	0.884862	0.773585	0.0847664	1	1.42219	0.891892	0.0505005	1	0.740267	0.692308	0.0606235	0.583383	0.930375	0.577778	0.0441351	1	0.626166	0.416667	0.0836449	1	1.39823	0.567901	0.139505	1	2.70539	0.644444	0.135231	1	2.59777	0.692308	0.207067	4.18602e-06	4.54701	0.888889	0.156153	4.89242e-06	3.13534	0.929577	0.114741	1	2.09857	0.91358	0.0891505	1	1.51681	0.898305	0.0719591
spo11	0.0402469	1	0.50095	0.45283	0.0623555	1	0.864301	0.810811	0.0690059	1	0.982092	0.692308	0.0187305	1.89934e-17	0.197615	0.188889	0.00424493	5.59746e-05	0.0345876	0.0416667	0.0179341	4.63091e-20	0.187587	0.0987654	0.0648352	0.888906	0.907793	0.244444	0.173708	0.295461	3.23367	0.807692	0.206874	3.57355e-10	4.07213	0.955556	0.18222	3.54865e-11	3.44399	0.929577	0.130751	0.000580441	2.22933	0.925926	0.129835	0.0167265	2.20903	0.949153	0.0978965
si:dkey-90m5.4	0.0265041	0.0617719	0.290946	0.339623	0.0149165	0.0106683	0.145785	0.243243	0.0265409	1	0.291437	0.403846	0.0362576	1.67294e-05	0.42661	0.3	0.0395313	1	0.474514	0.291667	0.0567185	0.0230876	0.743158	0.283951	0.148448	1	2.54795	0.688889	0.188517	0.0322913	3.48807	0.788462	0.20671	3.71003e-06	3.9394	0.911111	0.215399	1.43403e-16	4.15989	0.943662	0.13998	5.40546e-06	2.35967	0.925926	0.114161	1	1.81038	0.932203	0.0395118
si:ch211-161c3.6	0.0925115	1	0.766447	0.622642	0.0310223	1	0.195589	0.324324	0.0395665	1	0.263639	0.365385	0.0540311	1	0.388143	0.322222	0.0327696	1	0.209142	0.125	0.104813	1	0.899802	0.345679	0.150667	1	1.44182	0.533333	0.211593	0.0551205	2.25488	0.711538	0.206472	2.50726e-05	2.18301	0.844444	0.126387	1	1.14643	0.661972	0.0959311	1	0.802961	0.740741	0.0751018	1	0.587558	0.627119	0.0555709
oc90	0.0895728	1	1.31924	0.849057	0.142147	1	2.39682	0.864865	0.0988894	1	1.49769	0.846154	0.0513512	0.0119197	0.65343	0.422222	0.0381743	1	0.452509	0.25	0.040384	3.35952e-10	0.485017	0.234568	0.0722663	0.745725	1.00381	0.266667	0.14926	1	2.55484	0.730769	0.206405	1.55585e-06	3.91431	0.888889	0.138963	1	2.32697	0.830986	0.0988185	1	1.49631	0.876543	0.0903104	1	1.33315	0.745763	0.084311
s100a10b	0.139531	1	3.6492	0.886792	0.124744	1	3.15391	0.945946	0.0771227	1	1.70049	0.865385	0.038951	1.92662e-07	0.7236	0.4	0.0370412	1	0.68017	0.333333	0.0214138	7.79329e-22	0.349104	0.160494	0.0904303	1	2.08311	0.555556	0.183164	1	5.21499	0.788462	0.206205	3.75203e-13	6.09812	1	0.139848	0.622335	3.66005	0.859155	0.110823	0.202621	2.70568	0.938272	0.0792945	1	1.76158	0.864407	0.0500301
crppa	0.075424	1	0.856791	0.735849	0.0690016	1	0.765479	0.648649	0.0606968	1	0.651271	0.692308	0.0423474	8.77791e-07	0.415821	0.311111	0.0367916	1	0.349613	0.25	0.0705247	1	0.786903	0.358025	0.113876	1	1.45249	0.488889	0.192408	0.829258	2.88432	0.75	0.205699	3.12778e-07	3.1504	0.888889	0.125888	1	1.65418	0.760563	0.090433	1	1.07972	0.765432	0.0860247	1	1.01291	0.881356	0.0670272
btg1	0.0994675	1	0.96142	0.622642	0.0971783	1	0.933087	0.837838	0.0561167	1	0.465149	0.519231	0.0618073	2.4439e-05	0.525072	0.211111	0	0.000104561	0	0	0.0305328	1.25249e-10	0.219249	0.123457	0.0804958	1	0.733422	0.311111	0.146777	1	1.59247	0.557692	0.20555	0.00105989	2.48033	0.822222	0.106784	1	1.05342	0.577465	0.112842	1	1.13123	0.790123	0.134123	1	1.41564	0.847458	0.129785
figla	0.00595987	1.00512e-09	0.116524	0.150943	0.0030551	3.2263e-08	0.0539402	0.0540541	0.0067771	6.70079e-09	0.135308	0.173077	0.00658835	1.81412e-21	0.13093	0.122222	0.00495146	0.00659524	0.0940009	0.0833333	0.0274629	5.11761e-06	0.713724	0.283951	0.0430382	1	1.23828	0.422222	0.120953	1	4.58406	0.884615	0.205347	8.46033e-14	9.17484	1	0.164577	1.14878e-09	6.85323	0.943662	0.147703	1.50745e-14	5.947	1	0.14874	1.93575e-09	6.0017	1	0.15117
dct	0.0833763	1	0.713834	0.641509	0.0962885	1	0.858197	0.702703	0.0804283	1	0.681841	0.711538	0.0450876	0.00115932	0.329597	0.233333	0.04701	1	0.347127	0.208333	0.051749	6.31777e-05	0.39121	0.160494	0.104415	1	0.952442	0.355556	0.167414	1	1.76111	0.634615	0.205333	1.08156e-06	2.30514	0.866667	0.135965	1	1.34112	0.661972	0.0826047	1	0.705424	0.617284	0.0630532	1	0.501089	0.474576	0.0880135
tsga10	0.038519	1	0.524912	0.509434	0.0449465	1	0.635207	0.594595	0.0326187	0.40196	0.427985	0.480769	0.0370128	4.79492e-08	0.499762	0.355556	0.0149752	0.00271911	0.16729	0.125	0.0795822	1	1.30155	0.493827	0.0936394	1	1.60202	0.466667	0.15674	0.0372542	3.12493	0.884615	0.205063	8.40827e-06	4.45208	0.911111	0.163997	2.94805e-08	3.31617	0.929577	0.146069	7.31466e-08	2.84931	0.962963	0.113952	1	2.06284	0.898305	0.064843
zgc:55888	0.0209878	1	0.356059	0.396226	0.0278395	1	0.501192	0.675676	0.0116689	0.00155612	0.17679	0.307692	0.00502669	1.05141e-22	0.0660672	0.0666667	0.00426052	0.00460891	0.0545843	0.0416667	0.0134023	4.73803e-15	0.208305	0.0987654	0.00358851	1.03414e-10	0.0448035	0.0222222	0.0783421	1	1.81263	0.538462	0.204557	7.89642e-11	6.30475	0.933333	0.190041	4.43515e-20	5.72067	0.971831	0.13925	7.60851e-13	3.80307	0.962963	0.120608	1.23834e-05	3.15444	1	0.124856
npm2a	0.0352424	1	0.937209	0.622642	0.0527823	1	1.54516	0.918919	0.0489282	1	1.40582	0.730769	0.0064167	3.27804e-28	0.122936	0.1	0.00402775	3.55276e-05	0.0717248	0.0416667	0.00661258	1.04588e-26	0.127315	0.0617284	0.0194632	1.25068e-07	0.455869	0.133333	0.0792592	1	2.57893	0.634615	0.204386	3.2948e-14	8.82857	1	0.187456	4.55055e-21	7.87595	0.985915	0.140362	2.88101e-13	5.38703	1	0.140373	2.07243e-08	5.38757	1	0.127627
nf2a	0.0522456	1	0.550195	0.509434	0.0684414	1	0.772228	0.783784	0.0605808	1	0.662222	0.692308	0.0494987	0.00572371	0.514376	0.388889	0.0579494	1	0.626327	0.375	0.102829	1	1.2978	0.419753	0.110218	1	1.41928	0.488889	0.197307	1.46234e-06	3.03912	0.865385	0.204234	4.90168e-06	3.18089	0.866667	0.123022	1	1.63635	0.676056	0.0834392	1	0.992992	0.777778	0.0785968	1	0.920215	0.813559	0.0761606
mnd1	0.022761	3.65686e-08	0.313512	0.377358	0.037891	1	0.583544	0.621622	0.0783117	1	1.44661	0.884615	0.0494688	0.0144841	0.811749	0.555556	0.0566886	1	0.962273	0.541667	0.0715144	0.416557	1.28924	0.469136	0.121767	1	2.55016	0.666667	0.182143	0.00575517	4.31907	0.865385	0.20395	2.36799e-12	5.01438	0.977778	0.160037	1.24012e-05	3.64317	0.943662	0.120682	0.147208	2.52072	0.950617	0.0843158	1	1.58929	0.932203	0.0619776
col9a1a	0.06549	1	0.501751	0.45283	0.0476815	1	0.337267	0.513514	0.026634	1	0.16494	0.230769	0.0199156	3.61056e-09	0.116095	0.1	0.0451301	1	0.315008	0.25	0.0802123	1	0.648678	0.296296	0.169632	1	1.71053	0.555556	0.170324	1	1.71971	0.538462	0.203374	2.50928e-06	2.17283	0.844444	0.0775541	1	0.621467	0.464789	0.0502561	1	0.360076	0.37037	0.0759066	1	0.604751	0.576271	0.189244
pimr138	0.0574819	1	0.533889	0.509434	0.0626009	1	0.594253	0.675676	0.0401089	1	0.341283	0.442308	0.031128	2.83362e-12	0.250011	0.166667	0.0396141	1	0.336096	0.125	0.0838657	1	0.860654	0.37037	0.11342	1	1.26826	0.444444	0.160965	1	2.00155	0.596154	0.202912	0.00405915	2.7157	0.822222	0.124981	1	1.43829	0.647887	0.121724	0.664606	1.38982	0.876543	0.108973	1	1.20437	0.830508	0.134643
atp1b3a	0.0637058	1	0.606982	0.603774	0.0471753	1	0.416883	0.540541	0.0731621	1	0.722927	0.673077	0.0814894	1	0.829016	0.466667	0.0961426	1	1.02417	0.541667	0.0385551	9.90654e-10	0.324788	0.17284	0.0568716	1	0.526362	0.244444	0.101552	1	1.09881	0.442308	0.202493	0.00269582	2.70605	0.844444	0.172689	0.0137216	2.1935	0.802817	0.176555	3.5486e-10	2.25836	0.91358	0.127221	1	1.47066	0.830508	0.0647954
poln	0.0345918	1	0.28605	0.301887	0.0321642	1	0.26166	0.378378	0.0441103	1	0.385986	0.384615	0.0743194	1	0.742142	0.466667	0.074799	1	0.748221	0.333333	0.102631	1	1.12094	0.419753	0.165592	1	2.08893	0.533333	0.251596	2.54991e-08	3.62967	0.788462	0.201579	0.00085619	2.70703	0.8	0.137068	1	1.6309	0.732394	0.0632239	1	0.605031	0.580247	0.0434032	1	0.378338	0.508475	0.0257729
elavl4	0.0348273	0.00687	1.14198	0.754717	0.0742058	1	2.93255	0.918919	0.0686771	1	2.65881	0.961538	0.0874951	1	3.61669	0.9	0.123885	1	5.66074	1	0.134257	1	6.28487	0.91358	0.155556	1	7.6188	0.888889	0.17241	1.5441e-07	8.72101	0.980769	0.201535	1.54929e-12	10.7144	0.977778	0.113656	1	5.06256	0.971831	0.0799224	1	3.22243	0.975309	0.0462549	1	1.62085	0.864407	0.014274
tasor2	0.0394469	0.00728487	1.0492	0.754717	0.0640214	1	1.91821	0.891892	0.0534179	1	1.52851	0.903846	0.0643488	1	1.93057	0.755556	0.0770848	1	2.42598	0.833333	0.0931091	1	3.08699	0.753086	0.114496	1	4.02873	0.822222	0.14738	1	5.59554	0.942308	0.201091	2.86253e-13	8.42104	1	0.185057	5.36804e-14	7.54617	0.971831	0.117919	1	4.18537	0.987654	0.0901918	1	2.96368	0.983051	0.0576099
akap1a	0.0166645	7.01742e-16	1.7431	0.886792	0.0270398	0.418472	3.12301	1	0.0268574	0.00072986	3.09743	0.980769	0.0326709	3.60685e-13	3.9333	0.888889	0.0379713	1	4.7305	1	0.0506732	1	6.76294	0.950617	0.0762824	1	11.3127	1	0.129063	0.559127	22.2382	1	0.200538	5.9922e-16	39.6492	1	0.201347	3.54426e-31	39.8607	1	0.15692	1.73656e-14	28.7059	1	0.146569	0.000138213	26.2517	0.983051	0.134527
myrip	0.0740711	1	0.51753	0.509434	0.0541486	1	0.348873	0.459459	0.0805241	1	0.575464	0.596154	0.0402519	0.383419	0.241384	0.211111	0.0360855	1	0.210996	0.166667	0.0174779	5.91663e-11	0.0876298	0.037037	0.0252586	0.0243279	0.136532	0.0666667	0.0496291	1	0.312931	0.192308	0.246363	0.000257842	2.47215	0.755556	0.301976	1.18639e-19	3.23493	0.816901	0.157269	0.000208	1.36714	0.790123	0.10057	1	0.764788	0.610169	0.0422485
limch1b	0.0656715	1	0.869681	0.716981	0.0911234	1	1.3185	0.702703	0.0828892	1	1.16827	0.788462	0.0332792	4.8229e-05	0.373813	0.3	0.0313763	1	0.347834	0.208333	0.016861	5.44379e-16	0.164246	0.0987654	0.010833	1.68223e-09	0.0971375	0.0444444	0.0269172	1.1742e-06	0.288577	0.115385	0.205656	0.300037	3.80879	0.755556	0.2323	1.30583e-13	4.47499	0.887324	0.188212	1.66719e-10	3.38805	0.925926	0.136728	1	2.22754	0.864407	0.0963956
dmrt1	0.0454651	1	1.11119	0.773585	0.0897642	1	2.61731	0.972973	0.07776	1	2.17954	0.942308	0.054435	0.417938	1.39049	0.666667	0.0392393	1	0.926184	0.541667	0.0346989	2.1431e-15	0.796196	0.37037	0.0488108	0.0303081	1.21367	0.444444	0.0734953	1	2.02898	0.615385	0.134748	1	4.42273	0.933333	0.226361	5.10673e-30	8.75042	1	0.177307	7.46538e-17	6.33731	0.987654	0.166667	1.99302e-06	5.84178	0.983051	0.100198
scamp3	0.0416666	1	0.444094	0.490566	0.0352884	1	0.361909	0.486486	0.0531486	1	0.600888	0.576923	0.0383466	6.56343e-07	0.400852	0.322222	0.0668622	1	0.801552	0.375	0.065063	0.322439	0.774449	0.358025	0.0559601	0.866198	0.64089	0.266667	0.0781705	1	0.97695	0.365385	0.159493	1	2.45502	0.8	0.216567	1.04797e-20	3.67461	0.971831	0.149777	9.77782e-08	2.26089	0.950617	0.147518	0.000436505	2.21637	0.949153	0.127377
mpp4l.1	0.011211	0.000264453	0.0838948	0.113208	0.0141869	1	0.110883	0.162162	0.0111516	0.00228747	0.08337	0.153846	0.00931971	9.25241e-13	0.0674912	0.0777778	0.017638	1	0.143771	0.125	0.0229744	6.42978e-07	0.197563	0.111111	1.11022e-16	2.48358e-08	0	0	0.0377765	1	0.362255	0.153846	0.105342	1	1.31747	0.6	0.212669	1.14761e-11	3.30229	0.887324	0.224513	2.07418e-24	3.54781	0.987654	0.267258	3.05097e-21	4.46828	1	0.196439
buc	0.0109875	2.57533e-07	0.258624	0.301887	0.0234563	1	0.639522	0.72973	0.0201852	1	0.533598	0.634615	0.0123429	6.82813e-20	0.29674	0.2	0.012524	0.012823	0.301902	0.125	0.0130441	2.42375e-19	0.31682	0.148148	0.0373035	1	1.12599	0.422222	0.0783791	1	2.84865	0.769231	0.1849	2.60429e-10	8.66571	1	0.21232	2.92396e-27	10.4022	1	0.153176	6.8275e-14	6.76608	0.987654	0.158716	1.02125e-10	7.0887	1	0.175566
fam117aa	0.052468	1	0.484395	0.490566	0.0444029	1	0.393601	0.459459	0.0338077	1	0.281294	0.403846	0.0286733	1.90214e-11	0.230023	0.2	0.0359699	1	0.303527	0.125	0.059866	8.7782e-05	0.57136	0.222222	0.13163	1	1.56474	0.533333	0.145809	1	1.78821	0.730769	0.191619	0.00403772	2.56067	0.844444	0.211463	9.26347e-18	2.91677	0.943662	0.117254	1	1.34653	0.851852	0.123326	1	1.43763	0.915254	0.0888978
ttn.1	0.0812685	1	1.9788	0.886792	0.108892	1	2.87955	0.972973	0.0645655	1	1.47859	0.730769	0.0530287	0.00141796	1.15512	0.455556	0.105281	1	2.75698	0.708333	0.0485011	1.33622e-06	1.03352	0.345679	0.0465778	0.00340468	0.982833	0.288889	0.0761845	1	1.82277	0.480769	0.166954	1	5.02559	0.844444	0.208824	3.83992e-09	6.75073	0.929577	0.16252	1.6012e-11	4.85097	0.975309	0.114677	1	3.07878	0.932203	0.0810068
sox8b	0.041007	1	0.274441	0.320755	0.0400071	1	0.266204	0.324324	0.0572328	1	0.415479	0.480769	0.0656278	1	0.493468	0.311111	0.0700793	1	0.536102	0.291667	0.0295658	3.61445e-09	0.18371	0.111111	0.0572681	1	0.4158	0.2	0.0383924	0.0523453	0.253021	0.153846	0.130101	1	1.18571	0.533333	0.208756	6.1466e-09	2.20618	0.84507	0.187157	2.50978e-11	1.90982	0.888889	0.161134	0.019464	1.56828	0.847458	0.154854
zgc:153284	0.0649551	1	0.452176	0.471698	0.0743389	1	0.536274	0.459459	0.0605193	1	0.413675	0.442308	0.0493541	0.0661763	0.320559	0.255556	0.06618	1	0.462953	0.333333	0.0734057	1	0.527754	0.296296	0.0564721	1	0.37928	0.155556	0.0265154	2.82188e-05	0.149377	0.0769231	0.203597	1	1.98136	0.688889	0.205228	8.819e-08	2.00238	0.802817	0.183229	3.05982e-10	1.72398	0.864198	0.14345	1	1.25022	0.79661	0.0686939
pkp3b	0.0363352	1	0.292891	0.358491	0.0280617	1	0.213545	0.351351	0.0291984	1	0.224124	0.346154	0.0271157	1.71115e-06	0.204824	0.177778	0.022477	1	0.163192	0.125	0.0042916	1.08414e-17	0.0232269	0.0246914	0.0273131	0.024705	0.206637	0.111111	0.0231696	5.98909e-05	0.169285	0.0769231	0.127748	1	1.43431	0.688889	0.20489	1.34729e-07	2.66617	0.816901	0.209189	4.27828e-18	2.74037	0.938272	0.238631	4.68681e-13	3.26206	0.915254	0.172367
pimr110	0.050522	1	0.475604	0.471698	0.0503101	1	0.473119	0.567568	0.0373116	1	0.326788	0.461538	0.0306162	1.23582e-09	0.256451	0.2	0.0413412	1	0.370834	0.291667	0.0462818	1.60429e-06	0.426478	0.185185	0.0788367	1	0.832662	0.333333	0.104608	1	1.19592	0.461538	0.190032	0.0124544	2.60678	0.844444	0.204844	1.98004e-06	2.87843	0.802817	0.168164	5.23506e-11	2.21904	0.950617	0.143776	0.203642	1.80702	0.898305	0.13812
crebzf	0.0466102	1	1.32041	0.716981	0.0450453	1	1.26563	0.810811	0.0583003	1	1.74577	0.884615	0.0680161	1	2.11946	0.788889	0.0585238	1	1.75417	0.666667	0.0672451	0.0729553	2.08917	0.580247	0.065608	1	2.02521	0.533333	0.0469714	0.00473267	1.33314	0.5	0.13833	1	5.27308	0.933333	0.204648	2.52082e-18	8.82283	0.985915	0.178689	6.2794e-17	7.37672	1	0.169408	2.35149e-07	6.87661	1	0.119975
AL928650.4	0.0540698	1	2.17475	0.754717	0.0623227	1	2.5987	0.783784	0.045651	1	1.76149	0.692308	0.0692952	1	2.97048	0.522222	0.10488	1	5.04121	0.625	0.0584913	1	2.39966	0.432099	0.12794	1	6.52039	0.666667	0.117499	1	5.83828	0.634615	0.175702	1	9.8765	0.777778	0.204473	2.03924e-05	12.0642	0.830986	0.127049	1	6.46141	0.765432	0.0896871	1	4.12357	0.644068	0.0901272
nexmifa	0.0567665	1	0.18908	0.264151	0.056837	1	0.189374	0.216216	0.0344431	1	0.101804	0.153846	0.060804	1	0.2061	0.155556	0.0473926	1	0.15096	0.125	0.0102614	9.38614e-09	0.0237933	0.0123457	0.0379	1	0.114499	0.0444444	0.050043	1	0.161534	0.0961538	0.0939236	1	0.357876	0.2	0.160512	1	0.717411	0.366197	0.256295	1.02515e-18	1.33081	0.82716	0.187534	0.00016541	0.880423	0.762712	0.171477
lyrm1	0.068166	1	0.852467	0.641509	0.0778374	1	1.00849	0.756757	0.0737345	1	0.941512	0.75	0.0735737	1	0.93891	0.522222	0.0559108	1	0.664449	0.375	0.0664127	0.708403	0.824885	0.37037	0.0259325	8.70107e-07	0.257928	0.133333	0.0251625	1.19418e-08	0.248672	0.134615	0.0631048	1	0.773457	0.422222	0.181258	8.36987e-07	3.01492	0.901408	0.241701	2.28013e-32	4.41052	0.987654	0.199199	4.43526e-10	3.4148	0.966102	0.0897135
fbxl14b	0.0698443	1	0.296619	0.396226	0.0518863	1	0.204218	0.27027	0.0760804	1	0.330562	0.346154	0.0715485	1	0.305805	0.244444	0.0737868	1	0.317973	0.208333	0.0175764	2.55458e-09	0.0544682	0.0493827	0	6.82333e-07	0	0	0.0692503	1	0.293434	0.173077	0.0616424	1	0.253397	0.2	0.167746	1	0.918678	0.549296	0.227867	4.33083e-21	1.37649	0.91358	0.211171	7.3868e-09	1.24464	0.864407	0.129829
nags	0.0603411	1	0.26588	0.301887	0.0344463	1	0.132614	0.189189	0.0108862	0.00026469	0.0332266	0.0384615	0.0081751	1.36609e-12	0.0237323	0.0222222	0.0157137	1	0.0513502	0.0416667	0.00694038	7.57619e-12	0.0196012	0.0123457	0	6.74078e-06	0	0	0.0347499	0.0444006	0.134049	0.0576923	0.169389	1	1.0029	0.466667	0.214761	6.39974e-09	1.37169	0.774648	0.227634	2.43149e-19	1.48155	0.901235	0.17284	0.00117543	1.02986	0.79661	0.196446
casp8	0.0768685	1	0.46231	0.490566	0.0726888	1	0.430662	0.432432	0.0690793	1	0.403785	0.403846	0.0763823	1	0.4586	0.244444	0.0755472	1	0.452245	0.166667	0.0637577	0.0633464	0.364951	0.148148	0.0524135	1	0.285477	0.133333	0.0823687	1	0.504793	0.230769	0.0696321	1	0.407874	0.2	0.166629	1	1.25704	0.690141	0.22724	6.64388e-15	1.89316	0.864198	0.157296	0.211328	1.16542	0.813559	0.103874
tnni2a.3	0.0131929	0.006937	0.0410605	0.0377358	0.0157982	1	0.0508777	0.0810811	0.0294695	1	0.107879	0.153846	0.0364619	0.15061	0.139997	0.133333	0.0241277	1	0.0846155	0.0416667	0.0255305	4.872e-05	0.0906108	0.0493827	0.0389692	1	0.151939	0.0888889	0.0558185	1	0.237396	0.115385	0.135459	1	0.736785	0.355556	0.212225	0.00233154	1.32936	0.633803	0.22587	5.42043e-15	1.44361	0.839506	0.223502	8.22959e-08	1.42362	0.79661	0.171524
blvra	0.0462352	1	0.206271	0.245283	0.0411087	1	0.178336	0.324324	0.0587034	1	0.277859	0.384615	0.0835001	1	0.433844	0.366667	0.0709773	1	0.352943	0.25	0.0611886	1	0.292708	0.185185	0.0472211	1	0.211748	0.111111	0.0815154	1	0.420747	0.192308	0.0772243	1	0.39278	0.244444	0.183085	1	1.20187	0.619718	0.215363	2.54592e-14	1.48938	0.851852	0.131876	1	0.78181	0.745763	0.0935891
sinhcaf	0.0914817	1	0.418117	0.45283	0.0692019	1	0.293157	0.243243	0.0374288	1	0.13625	0.173077	0.0636805	1	0.263966	0.233333	0.0990227	1	0.462836	0.25	0.00935518	1.35997e-10	0.0257899	0.0123457	0	2.48218e-05	0	0	0.0348782	0.164626	0.124932	0.0576923	0.103779	1	0.491632	0.222222	0.144538	1	0.755711	0.394366	0.214796	7.59652e-15	1.27291	0.82716	0.182758	6.5327e-06	1.02835	0.813559	0.164771
znf800a	0.0410312	1	0.368122	0.415094	0.0854308	1	0.924189	0.567568	0.0556992	1	0.538275	0.557692	0.0650338	1	0.653896	0.455556	0.11005	1	1.27927	0.666667	0.0134995	7.84216e-17	0.0959311	0.0617284	0.030708	0.000833928	0.257895	0.111111	0.0245364	1.55062e-06	0.196324	0.0961538	0.0547781	1	0.527162	0.311111	0.101435	1	1.15167	0.661972	0.212777	1.02282e-21	3.03269	0.938272	0.197424	8.31153e-16	2.74685	0.983051	0.174729
fam91a1	0.052078	1	0.497929	0.54717	0.0621312	1	0.621139	0.594595	0.0523604	1	0.5013	0.557692	0.0715176	1	0.74179	0.477778	0.0279296	1	0.231148	0.166667	0.0560729	0.000748535	0.546115	0.271605	0.0663114	1	0.674225	0.266667	0.0806797	1	0.864433	0.346154	0.106761	1	1.23765	0.555556	0.190588	2.09682e-06	2.63799	0.873239	0.206607	1.76932e-15	2.93475	0.925926	0.19074	1.43454e-10	2.64077	0.983051	0.0960144
slc17a6b	0.0607041	1	0.428707	0.45283	0.0575651	1	0.401076	0.432432	0.0566725	1	0.3933	0.384615	0.0622153	1	0.442165	0.311111	0.0367486	1	0.229772	0.166667	0.0154479	1.79445e-13	0.0805208	0.0493827	0.0826587	1	0.633565	0.244444	0.0479023	1	0.318871	0.173077	0.0989361	1	0.797436	0.377778	0.127328	1	1.10493	0.605634	0.205169	2.90819e-15	2.06642	0.925926	0.253731	2.8119e-21	2.73727	0.983051	0.159564
nkx1.2lb	0.00836615	0.00274239	0.021962	0.0377358	0.0198057	1	0.0610177	0.0810811	0.0221587	0.0883965	0.0698489	0.0576923	0.00407288	1.35412e-11	0.00952258	0.0111111	0.017617	1	0.053022	0.0416667	0.00951652	3.61502e-09	0.0255455	0.0123457	0.0570721	1	0.223321	0.0888889	0.124636	1	0.604868	0.211538	0.160346	1	0.840503	0.488889	0.199258	0.0015662	1.11898	0.619718	0.202178	6.37939e-13	1.1407	0.814815	0.215509	2.85253e-08	1.2412	0.830508	0.123915
igfbp1a	0.0377532	1	0.282492	0.283019	0.0292185	1	0.206398	0.27027	0.0228654	1	0.153297	0.153846	0.0765628	1	0.683549	0.288889	0.0848208	1	0.778736	0.291667	0.028196	0.0160578	0.197635	0.0864198	0.0385819	1	0.290147	0.133333	0.054222	1	0.442594	0.0961538	0.00686265	0.0120897	0.0368202	0.0222222	0.0492423	1	0.392483	0.253521	0.0840145	1	0.769306	0.555556	0.424014	5.99186e-45	6.35635	1	0.205893
cbsb	0.0896331	1	0.945451	0.754717	0.0814751	1	0.837034	0.72973	0.104901	1	1.15704	0.653846	0.0755964	1	0.761023	0.455556	0.0245821	1	0.189315	0.125	0.0163963	3.61511e-10	0.116336	0.0740741	0	6.93444e-09	0	0	0.00533541	1.32496e-08	0.0310967	0.0192308	0.019964	0.0362167	0.147285	0.111111	0.0243486	0.00145735	0.18714	0.169014	0.0991104	1	1.0755	0.691358	0.305585	4.43365e-31	4.70855	0.983051	0.25099
mpp4l	0.00341714	0.00240196	0.0109553	0.0188679	0.0121909	1	0.0481548	0.108108	0.0135479	1	0.0545723	0.115385	0.00281898	1.14792e-09	0.00878908	0.0111111	1.11022e-16	1	0	0	0.0138213	4.33722e-05	0.0558827	0.037037	0.0154162	0.290223	0.0636377	0.0222222	0.0323539	1	0.155712	0.0961538	0.132844	1	0.925063	0.377778	0.229041	5.26369e-05	1.89377	0.619718	0.188327	2.85174e-06	1.46203	0.691358	0.299733	3.27844e-14	2.70253	0.830508	0.189083
atoh1a	0.0611109	1	0.13843	0.188679	0.0242135	1	0.0442319	0.108108	0.0256226	1	0.047369	0.0769231	0.0203888	0.000407087	0.0359458	0.0333333	0.0266799	1	0.0497515	0.0416667	0.0129646	3.56449e-05	0.020934	0.0123457	0	0.0320933	0	0	0.0132074	0.273705	0.0213998	0.0192308	0.0690663	1	0.161512	0.111111	0.162382	1	0.486154	0.366197	0.289818	7.54562e-21	1.0449	0.777778	0.293729	3.51718e-17	1.06353	0.864407	0.151256
atf3	0.0805649	1	0.550825	0.45283	0.0543056	1	0.33493	0.486486	0.106493	1	0.787523	0.576923	0.0613952	1	0.390618	0.266667	0.0551176	1	0.341204	0.208333	0.049904	1	0.301406	0.160494	0.08092	1	0.553917	0.222222	0.129623	1	1.01588	0.384615	0.0638662	1	0.410498	0.244444	0.0564514	1	0.351569	0.239437	0.125996	1	0.979065	0.493827	0.288175	4.82642e-19	2.90941	0.881356	0.118438
arg2	0.158968	1	2.02912	0.735849	0.0961756	1	1.05677	0.648649	0.124121	1	1.46897	0.653846	0.0861997	1	0.918543	0.466667	0.0943085	1	1.03053	0.541667	0.0291951	6.45391e-07	0.23826	0.123457	0.00780284	3.03882e-06	0.0494239	0.0444444	0.0445044	0.760051	0.399966	0.153846	0.0548067	1	0.518322	0.333333	0.0457688	1	0.414105	0.28169	0.0779113	1	0.807555	0.54321	0.275224	6.56138e-25	4.18884	0.966102	0.151142
FO082781.1	0.0534511	1	0.137563	0.188679	0.109618	1	0.342474	0.405405	0.0760261	1	0.214367	0.365385	0.118412	1	0.378423	0.277778	0.106154	1	0.328574	0.25	0.0445187	0.0368652	0.10957	0.0617284	1.11022e-16	0.00101632	0	0	1.11022e-16	5.39011e-05	0	0	0.0337816	1	0.0779804	0.0666667	0.0849753	1	0.246983	0.183099	0.172099	0.23252	0.616731	0.567901	0.25277	2.25578e-12	1.02495	0.847458	0.17741
trib3	0.0772287	1	0.491692	0.54717	0.0611248	1	0.365912	0.405405	0.0873698	1	0.575382	0.557692	0.0850204	1	0.5557	0.366667	0.0473692	1	0.266086	0.166667	0.0332564	7.38085e-08	0.172	0.0987654	0.0950427	1	0.640851	0.244444	0.0720838	1	0.450527	0.173077	0.0746926	1	0.471288	0.311111	0.0825421	1	0.535128	0.394366	0.163999	6.27298e-07	1.30152	0.851852	0.25044	3.09281e-18	2.27646	0.983051	0.129082
mthfd2	0.0455147	1	0.303652	0.320755	0.0505764	1	0.34619	0.486486	0.110664	1	0.934807	0.730769	0.0920433	1	0.737554	0.455556	0.0810386	1	0.626869	0.291667	0.0387105	2.16088e-06	0.248562	0.111111	0.0178424	6.09428e-05	0.0970556	0.0444444	0.00932305	1.54192e-07	0.0449559	0.0384615	0.0253256	0.0375076	0.148002	0.111111	0.0801625	1	0.618257	0.450704	0.13479	0.292165	1.20745	0.777778	0.249392	1.87611e-19	2.71481	0.932203	0.195043
C22H1orf53	0.0203285	1	0.0380543	0.0566038	0.0594103	1	0.141951	0.27027	0.029165	1	0.0589061	0.0961538	0.0738872	1	0.186894	0.155556	0.0451026	1	0.100662	0.0833333	0.0225375	0.000191867	0.043091	0.0246914	0.0456559	1	0.102196	0.0444444	0.0166731	0.105445	0.0300052	0.0192308	0.0707315	1	0.176844	0.133333	0.104136	1	0.289764	0.28169	0.168714	0.013428	0.543132	0.592593	0.242576	1.80202e-12	0.877401	0.813559	0.215271
si:dkey-18j18.3	0.07203	1	0.451616	0.377358	0.105574	1	0.736043	0.594595	0.0804382	1	0.519562	0.615385	0.0764923	1	0.48738	0.311111	0.110425	1	0.779968	0.5	0.0479017	0.00779251	0.270717	0.148148	0.0995673	1	0.682579	0.266667	0.107268	1	0.751311	0.288462	0.0397452	1	0.214847	0.177778	0.0627232	1	0.379257	0.211268	0.173043	0.000111639	1.40139	0.753086	0.23059	2.42967e-15	2.04759	0.949153	0.107075
zgc:103559	0.00537589	0.00500376	0.0153154	0.0188679	0.00970523	1	0.0305139	0.0540541	0.0171535	1	0.0599458	0.0769231	0.0139898	1.80992e-05	0.0470115	0.0444444	0	1	0	0	0.0093562	3.56715e-06	0.0292283	0.0246914	0.0224331	0.578495	0.0827497	0.0222222	0.0183152	0.392975	0.0648388	0.0384615	0.0889243	1	0.45692	0.266667	0.104544	1	0.562406	0.380282	0.153265	4.77974e-05	0.924649	0.691358	0.224735	2.77027e-15	1.53141	0.881356	0.230463
lrrk2	0.0726001	1	0.309674	0.339623	0.089027	1	0.401462	0.567568	0.0903285	1	0.408986	0.5	0.0874937	1	0.392645	0.322222	0.0762917	1	0.329776	0.208333	0.0168534	8.68029e-11	0.0514941	0.037037	0.0241396	0.00385095	0.079325	0.0444444	0.0197142	6.62465e-05	0.0621386	0.0384615	0.0412351	0.654984	0.152636	0.0888889	0.150159	1	0.789757	0.56338	0.172839	1.33882e-05	0.949918	0.777778	0.224252	2.17156e-10	1.33974	0.864407	0.160263
hdac6	0.114978	1	1.20709	0.754717	0.118919	1	1.26095	0.918919	0.0859184	1	0.830034	0.711538	0.0450644	0.00505146	0.368607	0.311111	0.0308183	1	0.230953	0.166667	0.0454899	1.40823e-06	0.372929	0.185185	0.0658808	1	0.592615	0.266667	0.0500087	0.244503	0.419519	0.211538	0.0755867	1	0.705139	0.377778	0.115408	1	1.21293	0.676056	0.134689	1	1.48248	0.777778	0.223623	3.8485e-13	2.88786	0.915254	0.140255
ca10a	0.0773051	1	0.7114	0.641509	0.098744	1	0.9726	0.864865	0.0444299	1	0.355118	0.403846	0.0475105	1	0.385927	0.288889	0.067242	1	0.59624	0.333333	0.0257123	3.0984e-10	0.18165	0.0864198	0.0157386	6.97352e-05	0.100667	0.0666667	0.0393698	0.174281	0.305817	0.153846	0.081836	1	0.764855	0.355556	0.0764171	1	0.701039	0.394366	0.13792	0.022558	1.49918	0.802469	0.223326	7.40886e-16	2.82656	0.932203	0.225441
higd1a	0.0354195	2.10973e-06	2.06898	0.867925	0.0509509	1	3.24406	0.972973	0.0737349	1	5.16239	0.980769	0.0958235	1	7.21082	0.977778	0.0707466	1	4.89889	0.875	0.0948875	1	7.12058	0.975309	0.0710372	1	4.92436	0.866667	0.0569099	0.818287	3.7249	0.865385	0.0543017	1	3.51252	0.866667	0.0841789	1	6.1094	0.957746	0.140457	1.66537e-07	11.8299	1	0.221518	6.90368e-38	21.5466	1	0.183866
rpl9	0.0351519	1	4.43808	1	0.0349828	1	4.4119	0.945946	0.0293366	0.0140541	3.55745	0.980769	0.0735702	1	11.1456	0.966667	0.0420974	1	5.54191	0.958333	0.0588729	1	8.41511	0.987654	0.0617241	1	8.93008	0.977778	0.0401508	0.0576699	5.22712	0.884615	0.0322262	8.29105e-05	3.98983	0.844444	0.0887574	1	14.1532	1	0.160069	1.00079e-18	30.3929	1	0.221167	1.54114e-32	46.5533	1	0.19867
sesn2	0.0849623	1	1.53093	0.867925	0.058886	1	0.962768	0.810811	0.0958955	1	1.78742	0.865385	0.0517038	0.00136374	0.818196	0.511111	0.0252714	0.0550081	0.339425	0.25	0.0666149	0.107921	1.12435	0.45679	0.0745338	1	1.29601	0.466667	0.0979992	1	1.83792	0.711538	0.0951833	1	1.77041	0.688889	0.0845695	1	1.5219	0.746479	0.105382	1	2.01798	0.938272	0.215459	3.48435e-23	5.14358	0.983051	0.154129
tmprss13a	0.00961816	0.00172105	0.0891331	0.132075	0.0124518	1	0.120878	0.162162	0.00154218	4.20108e-08	0.0108407	0.0192308	0.00545105	1.45055e-14	0.045947	0.0444444	0.00647978	1	0.0561616	0.0416667	0	1.0223e-17	0	0	0.00492249	1.15312e-05	0.0408307	0.0222222	0.0107984	5.42661e-05	0.102147	0.0576923	0.136286	1	2.34135	0.733333	0.19962	1.3154e-12	3.86515	0.887324	0.192732	1.61343e-18	3.69001	0.962963	0.215233	2.74529e-16	4.2698	0.966102	0.187606
rdh10b	0.0370228	1	0.579605	0.528302	0.0357785	1	0.555755	0.675676	0.0452584	1	0.742786	0.692308	0.0351742	0.00242195	0.544253	0.388889	0.0429557	1	0.696255	0.375	0.0171725	1.77792e-15	0.228381	0.135802	0.0306411	0.00503551	0.459677	0.2	0.023072	2.448e-05	0.325701	0.192308	0.0488639	1	0.816991	0.466667	0.120709	0.0248343	2.57689	0.901408	0.188323	1.04597e-24	4.61257	1	0.213801	3.596e-22	5.45446	1	0.201775
tom1	0.0918167	1	0.321131	0.320755	0.0649614	1	0.206916	0.351351	0.0961723	1	0.340791	0.461538	0.111489	1	0.412235	0.322222	0.048422	1	0.143231	0.125	0.0614582	1	0.192972	0.123457	0.0476071	1	0.14024	0.0666667	0.019156	0.0261852	0.0461603	0.0192308	0.0112623	0.144192	0.0245296	0.0222222	0.0330175	1	0.0892981	0.112676	0.0566931	1	0.174388	0.209877	0.211782	3.48778e-11	0.95506	0.813559	0.171472
tp53i11b	0.145875	1	0.983948	0.698113	0.105227	1	0.643851	0.756757	0.089146	1	0.52037	0.576923	0.0414856	0.00419043	0.198991	0.166667	0.0563705	1	0.291373	0.125	0.0185869	2.30842e-10	0.0749188	0.0493827	0.0528987	1	0.269111	0.0888889	0.0580337	1	0.302184	0.153846	0.071994	1	0.396478	0.288889	0.0575468	1	0.29901	0.225352	0.135939	1	0.897369	0.679012	0.209795	3.20346e-10	1.58728	0.864407	0.170425
net1	0.094674	1	0.411051	0.471698	0.0676763	1	0.268151	0.324324	0.117889	1	0.545347	0.480769	0.0696055	1	0.277844	0.244444	0.122285	1	0.571858	0.375	0.0323675	4.09478e-06	0.107258	0.0617284	0.0567395	1	0.214841	0.111111	0.0143916	2.37077e-05	0.0403679	0.0192308	0.0654781	1	0.25721	0.155556	0.134425	1	0.64677	0.450704	0.18795	6.81427e-11	1.00391	0.839506	0.208677	9.7543e-07	1.15267	0.813559	0.104659
zbtb7b	0.109146	1	0.764545	0.54717	0.0859577	1	0.562647	0.594595	0.0917864	1	0.611884	0.576923	0.0753244	1	0.475605	0.288889	0.0223459	1	0.105913	0.0833333	0.04862	0.00631045	0.274418	0.148148	0.0185556	0.000241981	0.0846928	0.0444444	0.0072092	6.2467e-08	0.0277012	0.0192308	0.032728	0.335776	0.168396	0.111111	0.0810106	1	0.521694	0.338028	0.131049	0.7157	0.969114	0.765432	0.206546	3.65699e-13	1.76126	0.966102	0.26551
nav3	0.0613163	1	0.493757	0.509434	0.0456477	1	0.341577	0.432432	0.0458596	1	0.343545	0.346154	0.0323287	1.4449e-05	0.223315	0.188889	0.0348747	1	0.245049	0.166667	0.014336	7.26294e-14	0.0837838	0.0493827	0.024212	0.000457162	0.157092	0.0666667	0.0530002	1	0.411354	0.211538	0.132141	1	1.3188	0.666667	0.137804	1	1.39294	0.71831	0.145239	0.0211792	1.49189	0.802469	0.204691	7.51498e-13	2.34291	0.949153	0.256108
mkln1	0.0315789	1	0.622728	0.641509	0.0401952	1	0.837478	0.783784	0.0426195	1	0.900323	0.75	0.0205336	5.01167e-09	0.369522	0.277778	0.00393169	0.000691137	0.053022	0.0416667	0.00637787	2.86707e-22	0.0927819	0.0617284	0.0162764	9.1252e-06	0.279703	0.133333	0.0109812	1.011e-09	0.175331	0.0961538	0.0779988	1	1.92061	0.644444	0.15155	9.0523e-07	4.5264	0.929577	0.180238	3.24935e-20	5.68419	0.987654	0.204014	8.1142e-17	6.69414	1	0.23091
cdkn1bb	0.130102	0.0195324	3.40602	0.981132	0.140308	0.536392	3.75836	1	0.0943441	1	2.24873	0.865385	0.0993673	1	2.4036	0.777778	0.088102	1	2.06005	0.75	0.0537749	0.00107385	1.10395	0.395062	0.0189557	5.89209e-11	0.308271	0.133333	0.0474969	0.0412849	0.945726	0.365385	0.0594217	1	1.25099	0.6	0.0498487	0.0888829	1.00433	0.492958	0.0663792	1	1.438	0.765432	0.202614	2.37504e-13	6.09203	1	0.177134
znf207a	0.0599205	1	0.750334	0.622642	0.0623494	1	0.788752	0.594595	0.0769847	1	1.02963	0.769231	0.0865925	1	1.196	0.655556	0.076683	1	1.02451	0.458333	0.0752199	1	0.999759	0.395062	0.0595324	0.164706	0.744239	0.266667	0.0407578	2.33806e-06	0.464394	0.192308	0.0659694	1	0.846857	0.444444	0.111709	1	1.65898	0.732394	0.157189	1.70383e-08	2.58827	0.962963	0.201862	7.50473e-15	3.59809	0.983051	0.166438
cart3	0.05777	1	0.441075	0.471698	0.053153	1	0.397421	0.432432	0.0349713	1	0.236702	0.288462	0.0434606	1	0.309411	0.211111	0.096195	1	0.842123	0.416667	0.0113502	3.03212e-11	0.0611556	0.037037	0.0172895	0.00252328	0.100849	0.0444444	0.0102896	1.56236e-06	0.054474	0.0192308	0.0371651	1	0.255074	0.177778	0.0915867	1	0.790757	0.464789	0.165757	3.46358e-11	1.70779	0.864198	0.201336	4.06212e-15	2.20671	0.966102	0.205007
alg13	0.030443	1	1.42496	0.830189	0.0265354	1	1.20552	0.864865	0.0190145	1	0.80624	0.692308	0.0107878	3.14859e-20	0.410858	0.277778	0.00526957	0.000120456	0.177907	0.125	0.0042567	2.6575e-33	0.139031	0.0617284	0.0185699	0.000709749	0.783679	0.333333	0.0625265	1	3.47509	0.769231	0.138112	0.00129495	9.59343	1	0.188998	2.58866e-20	14.4805	1	0.199794	4.7963e-29	15.5824	1	0.200773	4.99792e-19	15.6835	1	0.177198
pde9a	0.0979917	1	0.435743	0.377358	0.0500245	1	0.186178	0.243243	0.0415342	1	0.147814	0.192308	0.0168222	0.00333761	0.0493147	0.0555556	0.0389959	1	0.136747	0.0833333	0.0207508	0.00504737	0.0634319	0.037037	0.0480378	1	0.177022	0.0666667	0.0832511	1	0.353696	0.192308	0.0826786	1	0.350599	0.222222	0.0661031	1	0.264013	0.211268	0.0757386	1	0.313609	0.37037	0.153289	0.378368	0.778774	0.627119	0.389787
nectin3b	0.0350194	1	0.399589	0.471698	0.0361464	1	0.415438	0.513514	0.0501965	1	0.623634	0.673077	0.0389029	0.513131	0.454761	0.366667	0.0526088	1	0.661227	0.333333	0.0293909	1.909e-08	0.322514	0.160494	0.0469158	1	0.573344	0.288889	0.0311352	0.0051556	0.34602	0.173077	0.0745645	1	1.02547	0.533333	0.0778084	1	1.08244	0.647887	0.103241	1	1.55426	0.864198	0.162458	5.27172e-08	2.80316	0.932203	0.327816
cd82a	0.102426	1	0.974024	0.716981	0.0770851	1	0.677219	0.675676	0.0408374	1	0.305677	0.384615	0.0639301	9.04911e-05	0.534508	0.144444	0.00975481	1	0.0545843	0.0416667	0.0186303	1.41242e-08	0.117675	0.0740741	0.0162778	0.000648675	0.100123	0.0444444	0.011888	6.30455e-06	0.0689217	0.0384615	0.0609586	1	0.503447	0.311111	0.0830759	1	0.744883	0.507042	0.0935362	1	0.866806	0.666667	0.145016	0.000118577	1.52931	0.881356	0.301033
abcb5	0.0700086	1	0.428122	0.358491	0.0920946	1	0.606897	0.540541	0.0428534	1	0.231723	0.25	0.0223476	0.000237681	0.104609	0.0777778	0.0329683	1	0.167804	0.125	0.0205417	7.42308e-06	0.0945095	0.037037	0.0200468	0.65779	0.0917774	0.0444444	0.0535486	1	0.305682	0.153846	0.0805255	1	0.511302	0.266667	0.0463292	1	0.255238	0.197183	0.0885347	1	0.577042	0.518519	0.169644	1.11893e-05	1.34173	0.779661	0.292152
igl4v8	0.00943161	1	0.0130382	0.0188679	0	1	0	0	0.0207806	1	0.033345	0.0576923	0	0.000708162	0	0	0	1	0	0	0.0128057	0.701458	0.0187042	0.0123457	0.0337484	1	0.0600835	0.0222222	0	1	0	0	0.0372438	1	0.067812	0.0222222	0.0543258	1	0.108294	0.0985915	0.0710598	1	0.151798	0.222222	0.189294	0.000270888	0.539366	0.542373	0.28919
nrg1	0.0747108	1	0.317127	0.320755	0.0890512	1	0.396598	0.432432	0.0153353	0.711473	0.0454341	0.0576923	0.0442181	0.153907	0.164339	0.0888889	0.0482714	1	0.18324	0.0833333	0	4.77714e-10	0	0	0.0268299	1	0.0890431	0.0444444	0.100131	1	0.460954	0.173077	0.0531954	1	0.20682	0.177778	0.0913968	1	0.410014	0.338028	0.0980038	1	0.448408	0.469136	0.149273	0.0398837	0.773901	0.694915	0.286403
mafba	0.0808855	1	0.326309	0.377358	0.0627278	1	0.236537	0.216216	0.040538	1	0.13729	0.153846	0.0884241	1	0.365594	0.255556	0.0588159	1	0.218155	0.125	0.0216315	0.000854936	0.063826	0.037037	0.0311815	1	0.09947	0.0444444	0.0401735	1	0.135769	0.0576923	0.0393199	1	0.132219	0.111111	0.0569379	1	0.209459	0.183099	0.0964348	1	0.408551	0.432099	0.173741	0.13529	0.878592	0.644068	0.279609
dera	0.0594537	1	0.344591	0.396226	0.0532499	1	0.30018	0.459459	0.0544309	1	0.308522	0.403846	0.0443444	1	0.23906	0.177778	0.0390622	1	0.204377	0.166667	0.0199481	3.20263e-07	0.0902204	0.0493827	0	4.9642e-06	0	0	0.041161	1	0.218012	0.0961538	0.0464467	1	0.253197	0.2	0.0742293	1	0.455938	0.338028	0.0937796	1	0.614259	0.617284	0.159141	7.17503e-05	1.21997	0.830508	0.277795
enc1	0.079886	1	0.392642	0.377358	0.0466562	1	0.19974	0.324324	0.0568571	1	0.255603	0.288462	0.0757237	1	0.366832	0.233333	0.0484541	1	0.20935	0.166667	0.0291619	4.44734e-07	0.11206	0.037037	0.0276756	0.0109628	0.105146	0.0222222	0.0387482	1	0.158742	0.0961538	0.115478	1	0.630044	0.333333	0.152648	1	0.906173	0.521127	0.124761	1	0.696488	0.567901	0.180677	0.0172811	1.13088	0.728814	0.268225
lipg	0.0181434	1	0.0804888	0.113208	0.0431417	1	0.230979	0.324324	0.0327951	1	0.164817	0.25	0.0630358	1	0.370758	0.255556	0.0716397	1	0.435735	0.25	0.070939	1	0.430349	0.209877	0.0691859	1	0.416944	0.177778	0.0580787	1	0.334511	0.211538	0.0585487	1	0.337909	0.244444	0.0487245	1	0.268631	0.211268	0.0503245	1	0.279657	0.271605	0.0944766	1	0.61991	0.542373	0.267243
mgat5	0.0880076	1	0.483512	0.45283	0.107734	1	0.626903	0.72973	0.0718914	1	0.373822	0.480769	0.062376	1	0.312504	0.244444	0.0335566	1	0.144785	0.125	0.0522518	0.118272	0.250318	0.135802	0.0328072	0.145894	0.140835	0.0666667	0.0610837	1	0.304386	0.153846	0.0468989	1	0.218803	0.2	0.0832295	1	0.45026	0.338028	0.106303	1	0.616181	0.617284	0.143786	1	0.912038	0.661017	0.253086
baiap2a	0.0407326	1	0.169701	0.264151	0.0594659	1	0.271788	0.459459	0.0373613	1	0.152559	0.269231	0.00998246	1.6792e-10	0.0312358	0.0333333	0	0.682144	0	0	0.0141669	1.72178e-10	0.0472567	0.0123457	0.0149217	0.00482994	0.0502676	0.0222222	0.0162601	0.00275597	0.0556888	0.0384615	0.0864448	1	0.436428	0.244444	0.139053	1	0.806266	0.535211	0.157246	1.77476e-05	0.946986	0.740741	0.167	0.000250408	1.02485	0.79661	0.249256
trib2	0.0828671	1	0.37966	0.415094	0.0903338	1	0.423881	0.540541	0.104767	1	0.512755	0.576923	0.108377	1	0.535652	0.388889	0.134108	1	0.706107	0.375	0.064785	1	0.27792	0.135802	0.02766	0.030786	0.0969688	0.0444444	0.0337326	0.16291	0.123553	0.0769231	0.0658224	1	0.283541	0.177778	0.056658	1	0.234852	0.239437	0.113452	1	0.568281	0.567901	0.150285	1	0.819361	0.644068	0.248019
stc2a	0.0837967	1	0.40859	0.433962	0.121372	1	0.658025	0.486486	0.114866	1	0.612684	0.519231	0.117888	1	0.633639	0.388889	0.106312	1	0.554396	0.333333	0.028358	0.000822871	0.106052	0.0617284	0.0391575	1	0.15746	0.0444444	0.0162157	0.0247477	0.0540715	0.0384615	0.0700413	1	0.325389	0.2	0.0376517	1	0.150035	0.126761	0.0468563	1	0.196619	0.271605	0.17063	0.0935425	1.02696	0.677966	0.244035
ptprk	0.0966969	1	0.406288	0.45283	0.141766	1	0.666859	0.675676	0.0761923	1	0.299711	0.384615	0.102225	1	0.436384	0.277778	0.0764008	1	0.300753	0.208333	0.0536198	1	0.192554	0.111111	0.0293081	0.645809	0.0913972	0.0444444	0.0267481	0.00248925	0.0817781	0.0192308	0.0307427	1	0.0968836	0.0666667	0.0606648	1	0.224758	0.183099	0.0958131	1	0.401528	0.407407	0.148779	1	0.710312	0.661017	0.24368
prg4a	0.104215	1	0.43003	0.339623	0.0753597	1	0.284115	0.297297	0.0804079	1	0.308516	0.403846	0.0421432	1	0.137214	0.122222	0.0634717	1	0.228699	0.125	0.0571122	1	0.200301	0.0987654	0.128548	1	0.564256	0.266667	0.118278	1	0.50644	0.269231	0.0762487	1	0.288375	0.177778	0.078065	1	0.297129	0.239437	0.0721577	1	0.268901	0.296296	0.140499	1	0.633564	0.576271	0.240086
slc16a3	0.0487982	1	0.52262	0.509434	0.0240713	1	0.219674	0.351351	0.0259096	1	0.24016	0.365385	0.0344716	1	0.340209	0.244444	0.0397279	1	0.405089	0.291667	0.0220646	0.771796	0.197746	0.0987654	0.00694366	0.0697812	0.0502676	0.0222222	0.00501051	0.0030019	0.0344163	0.0192308	0.0340171	1	0.334716	0.2	0.0184006	1	0.158955	0.126761	0.0299348	1	0.286279	0.296296	0.0713233	1	0.841403	0.559322	0.239109
sox4a.1	0.0964452	1	0.415312	0.45283	0.0700801	1	0.276492	0.351351	0.0625932	1	0.23977	0.365385	0.0631389	1	0.242403	0.177778	0.0857769	1	0.357441	0.166667	0.0441991	0.00423377	0.155292	0.0617284	0.0479493	1	0.171809	0.0888889	0.0219301	0.040703	0.0659545	0.0384615	0.0349452	1	0.11624	0.0444444	0.0686773	1	0.269515	0.183099	0.168369	0.00100165	0.856869	0.666667	0.204481	1.4486e-05	1.10711	0.762712	0.237881
fbln5	0.0309999	1	0.114061	0.150943	0.0381463	1	0.147103	0.27027	0.0361585	1	0.137731	0.192308	0.0526873	1	0.219536	0.188889	0.0669076	1	0.296307	0.166667	0.0297117	9.74813e-06	0.108303	0.0493827	0.0616717	1	0.267404	0.111111	0.0662815	1	0.292813	0.153846	0.120709	1	0.630382	0.444444	0.116064	1	0.599127	0.450704	0.10783	1	0.544771	0.54321	0.177591	0.00129292	1.04439	0.762712	0.236118
hsd17b12a	0.0615316	1	0.592599	0.54717	0.0496339	1	0.452913	0.378378	0.0312964	1	0.256461	0.346154	0.0427979	1	0.376822	0.266667	0.0543861	1	0.50764	0.333333	0.019358	3.7829e-08	0.143336	0.0864198	0.00822684	9.30078e-06	0.0519949	0.0222222	0.00565209	7.82771e-08	0.0335751	0.0192308	0.0239961	0.206845	0.185688	0.111111	0.0661535	1	0.649183	0.450704	0.119568	0.000100512	1.38385	0.839506	0.176819	5.13221e-14	2.30785	0.966102	0.235272
top1mt	0.0601637	1	0.815546	0.660377	0.0592538	1	0.800091	0.783784	0.0732347	1	1.04509	0.788462	0.061726	1	0.842243	0.533333	0.0570335	1	0.762681	0.375	0.0735498	1	1.05079	0.432099	0.0655431	1	0.908331	0.333333	0.0413453	0.000682634	0.51115	0.269231	0.0699428	1	0.985982	0.488889	0.111187	1	1.78318	0.746479	0.1353	9.55979e-05	2.30056	0.962963	0.15133	4.3813e-05	2.66301	0.966102	0.23447
zbtb16a	0.0600977	1	1.46558	0.830189	0.101277	1	2.84496	0.972973	0.071193	1	1.81451	0.884615	0.0551111	1	1.3148	0.622222	0.0245936	1	0.48733	0.333333	0.0223439	2.07162e-15	0.433971	0.197531	0.0269616	2.48314e-06	0.544812	0.177778	0.0192406	3.94118e-09	0.36249	0.173077	0.0613947	1	1.50542	0.466667	0.0748096	1	1.93208	0.774648	0.125457	5.07653e-07	3.75236	0.975309	0.148058	0.000104638	4.65696	0.949153	0.234397
otpb	0.0380708	1	0.15787	0.169811	0.0167511	1	0.0583455	0.0540541	0.00826365	1	0.0253008	0.0576923	0.0110816	0.10401	0.0357209	0.0444444	0	1	0	0	0.0070266	0.00253229	0.020934	0.0123457	0.0186443	1	0.0663256	0.0444444	0.0927723	1	0.483017	0.211538	0.0836597	1	0.423224	0.266667	0.0470207	1	0.204977	0.169014	0.053725	1	0.242004	0.283951	0.0555452	1	0.252299	0.355932	0.232948
nell2b	0.0523422	1	0.119762	0.132075	0.0729809	1	0.181898	0.216216	0.062408	1	0.149288	0.211538	0.0238754	0.545505	0.0456744	0.0444444	0.0527884	1	0.121037	0.0833333	0.0163975	0.00653693	0.0290786	0.0123457	0.0991059	1	0.268784	0.0888889	0.0544939	1	0.125942	0.0576923	0.0482726	1	0.108274	0.0888889	0.0492729	1	0.111073	0.0985915	0.101039	1	0.275544	0.382716	0.106101	1	0.293451	0.389831	0.232363
fkbp1ab	0.0386623	1	0.722813	0.566038	0.0299152	1	0.527807	0.540541	0.0297903	1	0.525119	0.576923	0.0255096	7.40547e-05	0.434848	0.333333	0.019173	1	0.308128	0.208333	0.0317347	4.72104e-05	0.567266	0.246914	0.0243838	0.000226891	0.411707	0.133333	0.0309555	1	0.550294	0.288462	0.0629601	1	1.32642	0.511111	0.0793462	1	1.77735	0.732394	0.123773	5.01615e-08	3.14738	0.950617	0.184217	1.74881e-17	5.29719	0.983051	0.232223
npm2b	0.0212163	1	1.79752	0.811321	0.0188313	1	1.55745	0.864865	0.0204171	1	1.71632	0.923077	0.00737484	2.33489e-23	0.513919	0.411111	0.0121747	1	0.926276	0.5	0.0119759	6.57887e-15	0.908409	0.419753	0.0151731	0.000339677	1.20301	0.444444	0.0380177	1	3.65669	0.788462	0.0813499	1	9.47569	0.977778	0.0984642	4.01996e-05	12.097	1	0.144491	1.11822e-18	19.8875	1	0.181644	1.75085e-19	26.8565	1	0.231735
hsp90b1	0.0415554	1	1.68343	0.830189	0.0356433	1	1.39345	0.864865	0.0490569	1	2.06811	0.942308	0.0766261	1	3.62258	0.933333	0.0807931	1	3.87486	0.916667	0.0920121	1	4.57469	0.876543	0.0385838	0.0027159	1.53616	0.444444	0.0174169	4.60299e-23	0.585098	0.134615	0.0251878	6.46374e-06	0.912332	0.444444	0.0628014	1	2.81708	0.859155	0.0982998	1	4.97952	1	0.192494	7.27027e-15	11.9599	1	0.225189
metrnla	0.0564082	1	0.207561	0.226415	0.0438793	1	0.151811	0.216216	0.0192355	1	0.0555645	0.0769231	0.0619903	0.54682	0.233652	0.0888889	0.0456335	1	0.159371	0.0833333	0.0210002	0.000149147	0.0617492	0.037037	0.0214676	0.439125	0.0634087	0.0222222	0.0111445	0.014778	0.0290181	0.0192308	0.105118	1	0.457654	0.244444	0.104712	1	0.455376	0.380282	0.121597	1	0.552487	0.580247	0.190063	4.08689e-06	0.991541	0.728814	0.224182
pik3ip1	0.0796284	1	0.549429	0.54717	0.0808161	1	0.559879	0.648649	0.0768046	1	0.524784	0.576923	0.0693932	1	0.461471	0.344444	0.0450968	1	0.269057	0.208333	0.0402111	0.000423562	0.233474	0.111111	0.0115759	4.05002e-05	0.0519949	0.0222222	0.0362914	0.832699	0.205771	0.115385	0.0767001	1	0.523877	0.311111	0.081618	1	0.566961	0.422535	0.0716394	1	0.480446	0.506173	0.0813665	1	0.564738	0.661017	0.223518
si:ch73-303b9.1	0.00742575	0.000700508	0.0442705	0.0566038	0.0415587	1	0.34876	0.405405	0.0585164	1	0.533988	0.538462	0.0531758	1	0.473712	0.333333	0.0432953	1	0.366873	0.25	0.0422383	1	0.355824	0.209877	0.060115	1	0.55236	0.244444	0.0169162	0.0121833	0.117048	0.0576923	0.0288258	1	0.222652	0.155556	0.0283631	1	0.218307	0.183099	0.0630791	1	0.586812	0.555556	0.126513	0.365915	1.42919	0.728814	0.221954
nptna	0.0368011	1	0.241864	0.320755	0.0383855	1	0.254742	0.297297	0.0304531	1	0.191794	0.230769	0.0452552	0.498227	0.312229	0.233333	0.0528899	1	0.379073	0.25	0.0188822	5.31755e-09	0.107568	0.0864198	0.0429705	0.795077	0.29282	0.111111	0.0368606	0.404688	0.242345	0.134615	0.100567	1	0.85573	0.488889	0.144039	0.756754	1.36353	0.71831	0.142471	0.000192151	1.34417	0.814815	0.154178	0.0225539	1.49048	0.79661	0.221698
degs2	0.0321398	1	0.3818	0.396226	0.0187794	1	0.199175	0.324324	0.0173673	0.0202894	0.181367	0.269231	0.0188973	1.59718e-12	0.200676	0.133333	0.00606198	0.0251217	0.0524817	0.0416667	0.0161826	1.2415e-13	0.166682	0.0864198	0.0301347	0.157838	0.352907	0.177778	0.0789497	1	1.17036	0.442308	0.164403	0.0250871	3.02212	0.822222	0.133531	2.1161e-05	2.30212	0.915493	0.119088	9.7476e-05	1.98392	0.91358	0.146647	8.78908e-07	2.60165	0.949153	0.221557
rnd1a	0.0424326	1	0.142864	0.188679	0.019284	1	0.0546703	0.0810811	0.00849906	0.0045448	0.0206972	0.0384615	0.0579911	1	0.210787	0.166667	0.0718928	1	0.276324	0.208333	0.013093	1.34169e-07	0.0344436	0.0246914	0.0318858	0.103678	0.100535	0.0222222	0.0388377	1	0.128073	0.0769231	0.134451	1	0.617602	0.311111	0.179256	1	0.900384	0.56338	0.170277	4.74589e-05	0.84149	0.703704	0.16941	0.00283661	0.835863	0.762712	0.220404
ankrd22	0.0539734	1	0.847284	0.660377	0.0618356	1	1.00475	0.837838	0.0323579	1	0.450132	0.576923	0.021089	3.87254e-06	0.267727	0.233333	0.0100445	0.657628	0.110746	0.0833333	0.0243841	2.39761e-06	0.319022	0.17284	0.0194374	0.00156575	0.242716	0.111111	0.0604981	1	0.977518	0.365385	0.103157	1	1.92688	0.622222	0.0468495	1	0.710298	0.492958	0.0607301	1	0.982229	0.62963	0.177908	1.17513e-13	3.92036	0.966102	0.218684
rims2b	0.0946381	1	0.471991	0.45283	0.0739905	1	0.344857	0.486486	0.070355	1	0.323543	0.461538	0.0675763	1	0.307481	0.233333	0.0313274	1	0.118396	0.0833333	0.0708299	1	0.326308	0.160494	0.12332	1	0.664186	0.244444	0.0820648	1	0.393371	0.173077	0.192041	1	1.18654	0.577778	0.0893957	1	0.438769	0.295775	0.0448671	1	0.184214	0.283951	0.134146	1	0.741009	0.711864	0.218183
casc4	0.0495811	1	0.423404	0.45283	0.0755586	1	0.718981	0.648649	0.130627	1	1.45315	0.903846	0.103813	1	1.07921	0.622222	0.0992174	1	1.01814	0.583333	0.034541	4.04852e-11	0.270883	0.148148	0.0217738	8.05155e-08	0.15457	0.0666667	0.0113068	2.20358e-12	0.0707368	0.0384615	0.0552224	1	0.484352	0.244444	0.115514	1	1.23879	0.661972	0.157375	8.62815e-08	1.85365	0.925926	0.139295	0.624653	1.58009	0.881356	0.217824
si:ch211-157j23.2	0.0169133	1	0.0905212	0.132075	0.0183459	1	0.0997748	0.108108	0.0186091	1	0.101494	0.115385	0.00725262	1.76663e-09	0.0333143	0.0444444	0.0102117	1	0.0497515	0.0416667	0.00261899	4.40884e-11	0.0102906	0.0123457	0.0212896	1	0.119312	0.0666667	0.0131336	0.00475841	0.0669813	0.0384615	0.132045	1	1.16882	0.6	0.113179	1	0.956878	0.535211	0.114226	0.00131153	0.968343	0.753086	0.142063	0.000983723	1.28579	0.779661	0.217417
cd99	0.167978	1	0.54343	0.490566	0.070369	1	0.176808	0.297297	0.0454299	1	0.102211	0.134615	0.00703725	3.34435e-07	0.0109135	0.0111111	0	1	0	0	0.0251817	6.2055e-05	0.0495898	0.0123457	0.0184323	1	0.0340464	0.0222222	0.0124831	0.189022	0.0213998	0.0192308	0.0864083	1	0.229525	0.177778	0.0715982	1	0.180725	0.169014	0.113764	1	0.326858	0.407407	0.199246	7.93694e-07	0.680558	0.728814	0.217138
pdlim2	0.0537299	1	0.11781	0.150943	0.0864887	1	0.214938	0.324324	0.0672538	1	0.156178	0.269231	0.0449559	1	0.0943656	0.111111	0	1	0	0	0.0289042	0.000785919	0.0548413	0.037037	0	0.00275745	0	0	0.0125714	0.0250096	0.0201839	0.0192308	0.131045	1	0.3673	0.2	0.156744	1	0.46413	0.394366	0.136311	1	0.386643	0.481481	0.172744	0.023299	0.527342	0.677966	0.216269
vegfaa	0.0932675	1	0.342185	0.339623	0.0769939	1	0.267927	0.432432	0.145321	1	0.607617	0.596154	0.126738	1	0.50835	0.277778	0.119974	1	0.473409	0.25	0.0350973	0.0298559	0.100512	0.0740741	0.0430699	1	0.129354	0.0666667	1.11022e-16	2.28782e-05	0	0	0.0935977	1	0.343738	0.2	0.0594328	1	0.193228	0.15493	0.0636262	1	0.210518	0.283951	0.147438	0.675468	0.61922	0.677966	0.216181
foxg1a	0.0894901	1	0.341554	0.358491	0.0564668	1	0.190715	0.216216	0.0111449	0.0265196	0.0266294	0.0384615	0.0192057	4.38089e-06	0.0508938	0.0444444	0.0238395	1	0.0660346	0.0416667	0.0346402	0.000979616	0.104093	0.0493827	0.0799074	1	0.295604	0.111111	0.0509428	1	0.167697	0.0769231	0.0411663	1	0.128735	0.111111	0.118485	1	0.490229	0.338028	0.181565	1.81321e-08	0.856622	0.740741	0.210205	7.75686e-08	1.0394	0.779661	0.215667
ssb	0.0312547	1	1.4344	0.754717	0.0398241	1	1.9313	0.918919	0.0498173	1	2.54896	0.980769	0.0730687	1	4.12386	0.922222	0.062521	1	3.3871	0.791667	0.0255946	1.07799e-11	1.12476	0.419753	0.0137034	1.00989e-10	0.531566	0.266667	0.00816756	1.02019e-21	0.288828	0.115385	0.0418588	1	2.05388	0.666667	0.0843201	1	4.94739	0.985915	0.121999	1.06097e-09	7.95767	1	0.174605	3.20403e-16	12.7162	0.983051	0.215422
jpt1b	0.0889072	1	5.70066	0.981132	0.0748401	1	4.57784	1	0.074064	1	4.51771	0.980769	0.0901083	0.0285409	5.79935	1	0.0662989	1	3.92728	0.916667	0.0454093	1	2.44638	0.679012	0.0227474	2.5096e-08	1.05016	0.377778	0.0102071	2.36195e-21	0.404067	0.211538	0.0172905	2.73552e-09	0.755241	0.4	0.0400677	1	2.0955	0.859155	0.0616585	1	3.58434	1	0.10235	0.73703	6.82931	1	0.214461
gyg1a	0.0717629	1	6.79413	1	0.0692848	1	6.49874	0.972973	0.057644	1	5.15569	0.961538	0.0502328	1	4.34115	0.9	0.0305258	1	2.3491	0.833333	0.0385213	0.0105174	3.12458	0.814815	0.0183345	1.17715e-16	1.2681	0.4	0.0251301	2.27622e-07	1.85424	0.673077	0.0620056	1	5.65008	0.955556	0.0971265	1	9.99336	1	0.114825	1.01832e-05	12.4001	1	0.149205	5.38582e-13	17.4373	1	0.214181
grasp	0.120185	1	0.666117	0.660377	0.0759218	1	0.369494	0.459459	0.0824803	1	0.410553	0.519231	0.0788745	1	0.387845	0.277778	0.0349149	1	0.140205	0.0833333	0.0735577	1	0.354963	0.222222	0.0302064	0.0291383	0.117432	0.0444444	0.0622989	1	0.287801	0.153846	0.0739051	1	0.357089	0.222222	0.0907853	1	0.464066	0.323944	0.0861085	1	0.433727	0.481481	0.12878	1	0.72864	0.610169	0.213099
tp53bp2b	0.0537786	1	0.221212	0.283019	0.148335	1	0.80985	0.756757	0.0912292	1	0.431598	0.576923	0.0875987	1	0.409752	0.311111	0.0485189	1	0.194574	0.125	0.0948028	1	0.45338	0.209877	0.0385395	0.951629	0.146316	0.0888889	0.0647848	1	0.279429	0.153846	0.086052	1	0.400534	0.266667	0.0616222	1	0.26237	0.253521	0.101759	1	0.49656	0.54321	0.139126	0.487628	0.744779	0.779661	0.212673
zgc:113886.1	0.04749	1	0.150203	0.188679	0.0653733	1	0.224072	0.324324	0.0417721	1	0.128122	0.153846	0.0489864	1	0.156111	0.122222	0.111079	1	0.440772	0.166667	0.0204228	0.00011434	0.0535579	0.0246914	0.0717106	1	0.251854	0.111111	0.0540783	1	0.176601	0.0769231	0.0254179	1	0.069755	0.0666667	0.0836548	1	0.306304	0.225352	0.164223	0.805408	0.733688	0.530864	0.21525	6.42658e-07	1.04833	0.728814	0.212424
zgc:112265	0.0160639	1	0.0562183	0.0943396	0.0495037	1	0.221358	0.351351	0.0210084	1	0.0775504	0.115385	0.0454464	1	0.199041	0.155556	0.0884274	1	0.460149	0.291667	0.0570098	1	0.264037	0.135802	0.0750016	1	0.373101	0.133333	0.0879851	1	0.457209	0.211538	0.0827727	1	0.422928	0.266667	0.109031	1	0.602225	0.408451	0.105935	1	0.580254	0.469136	0.182327	0.00738728	1.1783	0.661017	0.211786
bcl2l10	0.103796	1	1.32291	0.754717	0.0908506	1	1.11493	0.756757	0.0414352	1	0.415519	0.461538	0.0882519	1	1.0743	0.622222	0.0908529	1	1.11496	0.541667	0.0452231	0.0431613	0.46304	0.234568	0.0372477	1	0.36437	0.177778	0.0283006	0.00206708	0.260352	0.134615	0.0147579	0.00025613	0.118936	0.111111	0.0243837	1.51254e-06	0.217287	0.15493	0.0882541	1	1.07433	0.666667	0.182165	2.25739e-10	2.75473	0.932203	0.211655
lman1	0.0413284	1	1.02564	0.830189	0.0470837	1	1.20543	0.783784	0.0649401	1	1.8024	0.961538	0.0593598	1	1.60983	0.755556	0.0554517	1	1.47814	0.625	0.0602792	0.331952	1.64119	0.580247	0.0400087	1.4927e-06	0.985356	0.333333	0.0631102	1	1.73867	0.576923	0.0745832	1	2.14715	0.822222	0.0975279	1	3.02362	0.971831	0.0997318	1	3.1117	0.975309	0.137654	1.25375e-05	4.72356	1	0.211216
hprt1l	0.0582464	1	0.170155	0.169811	0.0738698	1	0.229589	0.351351	0.0382433	1	0.100882	0.134615	0.055952	1	0.1618	0.166667	0.0378767	1	0.0996929	0.0833333	0.0663325	1	0.200377	0.0864198	0.017285	1	0.0384943	0.0222222	0.0834084	1	0.267917	0.134615	0.0514712	1	0.145776	0.111111	0.0273479	1	0.0669334	0.0704225	0.0773842	1	0.243538	0.333333	0.108522	1	0.375523	0.457627	0.210478
FO704871.1	0.0668812	1	0.176975	0.264151	0.0359193	1	0.0816346	0.135135	0.022384	1	0.0459027	0.0769231	0.0432807	1	0.102734	0.0888889	0.0898028	1	0.257348	0.166667	0	5.41139e-08	0	0	0	0.0208845	0	0	0.0138532	0.243177	0.025844	0.0192308	0.04347	1	0.103291	0.0666667	0.0889811	1	0.254339	0.225352	0.159294	0.00679687	0.540962	0.567901	0.187347	4.68139e-05	0.669672	0.661017	0.210367
wwp2	0.0938127	1	0.330191	0.377358	0.101214	1	0.364013	0.486486	0.059276	1	0.184454	0.25	0.0662722	1	0.21225	0.211111	0.0815291	1	0.275987	0.166667	0.0463525	0.0863353	0.1357	0.0864198	0.0456677	1	0.133217	0.0666667	0.0506333	1	0.15146	0.0769231	0.0734892	1	0.241884	0.177778	0.109276	1	0.401804	0.394366	0.133373	1	0.520309	0.530864	0.121386	1	0.46035	0.610169	0.210156
slc35e1	0.067861	1	0.413457	0.45283	0.0605516	1	0.358176	0.432432	0.0858265	1	0.557098	0.673077	0.0786275	1	0.498265	0.344444	0.0511369	1	0.289903	0.25	0.0370642	8.22982e-07	0.194613	0.123457	0.0544406	1	0.31347	0.133333	0.0536745	0.988854	0.307967	0.153846	0.0759775	1	0.47703	0.311111	0.118857	1	0.846899	0.535211	0.130361	0.769596	0.95486	0.777778	0.16468	6.32264e-06	1.2962	0.898305	0.20889
larp6a	0.0668073	1	1.68238	0.90566	0.0369894	1	0.805685	0.621622	0.0667335	1	1.68004	0.942308	0.0431522	1	0.9744	0.588889	0.0491708	1	1.14582	0.625	0.0216808	1.75272e-14	0.420473	0.222222	0.0278129	7.30995e-05	0.568482	0.222222	0.00574974	1.5128e-17	0.0876632	0.0576923	0.0509893	1	1.19884	0.488889	0.0927121	1	2.55192	0.859155	0.13597	7.58447e-14	4.18648	1	0.141837	2.89566e-08	4.42376	0.983051	0.20886
slc12a8	0.0992578	1	0.424415	0.45283	0.115986	1	0.518858	0.540541	0.072008	1	0.281824	0.423077	0.0320772	0.100734	0.10308	0.0888889	0.0328013	1	0.105934	0.0833333	0.0195149	0.000107666	0.0564466	0.037037	0	0.00122038	0	0	0.0433474	1	0.149302	0.0576923	0.0552408	1	0.201882	0.133333	0.0738815	1	0.291145	0.267606	0.0731372	1	0.287433	0.333333	0.133061	1	0.620168	0.644068	0.208671
si:dkey-241l7.2	0.00203222	1	0.0118171	0.0188679	0.00434933	1	0.0282213	0.0540541	0.0024861	1	0.014864	0.0192308	0.00327077	0.0149138	0.0203378	0.0333333	0.00709243	1	0.0497515	0.0416667	0	4.47774e-05	0	0	0	0.815443	0	0	0.00926696	1	0.068033	0.0384615	0.0114822	1	0.0875714	0.0666667	0.0182537	1	0.152015	0.140845	0.0319321	1	0.29911	0.37037	0.0584194	1	0.631822	0.610169	0.208133
zgc:66426	0.0691572	1	0.322322	0.415094	0.0661943	1	0.304986	0.405405	0.0365841	1	0.145777	0.211538	0.0258051	3.88457e-05	0.0951911	0.0777778	0.0535014	1	0.23347	0.166667	0.0551984	1	0.242764	0.123457	0.0401032	1	0.163235	0.0888889	0.105784	1	0.554492	0.269231	0.159713	1	0.947742	0.466667	0.0924291	1	0.4662	0.408451	0.0919217	1	0.462924	0.444444	0.103047	1	0.536078	0.559322	0.206868
gtf2a1l	0.0396093	1	0.664469	0.490566	0.0535354	1	0.965774	0.756757	0.0297026	1	0.466863	0.5	0.0238976	8.35778e-07	0.358506	0.3	0.0154775	1	0.212808	0.166667	0.0343712	0.000199011	0.558106	0.271605	0.0403355	1	0.67953	0.244444	0.0274514	0.00355306	0.424143	0.211538	0.0494728	1	0.875248	0.444444	0.103908	1	2.23965	0.816901	0.143592	1.68866e-15	3.4078	1	0.175315	6.21955e-14	4.42788	0.983051	0.206673
flj11011l	0.0690806	1	0.466773	0.490566	0.156608	0.01411	1.33945	0.864865	0.111813	1	0.86376	0.807692	0.0926344	1	0.678002	0.444444	0.0489512	1	0.303059	0.166667	0.0285932	2.68495e-07	0.156376	0.0864198	0.0232769	0.00709121	0.121844	0.0666667	0.0143581	3.60019e-05	0.0682792	0.0576923	0.0212109	0.0261811	0.108918	0.0888889	0.0426348	1	0.25532	0.225352	0.0805127	1	0.56683	0.54321	0.144379	1	1.2042	0.79661	0.206644
nlgn1	0.128078	1	0.408835	0.433962	0.0703015	1	0.189413	0.27027	0.0485958	1	0.119199	0.153846	0.042516	0.246585	0.100988	0.1	0.05091	1	0.126309	0.0833333	0.0213552	5.08727e-06	0.0435845	0.0246914	0.0243566	0.246889	0.0510863	0.0222222	0.059766	1	0.15437	0.0961538	0.0595154	1	0.153558	0.111111	0.143257	1	0.473107	0.408451	0.195607	2.33098e-05	0.712408	0.641975	0.191233	0.00478933	0.691449	0.711864	0.205572
tmem238a	0.0961728	1	0.41425	0.45283	0.101557	1	0.444286	0.567568	0.126077	1	0.587664	0.653846	0.0589783	1	0.222742	0.188889	0.0130759	1	0.0355794	0.0416667	0.0150666	6.97847e-09	0.042106	0.0246914	0.0135312	0.00482386	0.037054	0.0222222	0.0498171	1	0.180369	0.0961538	0.0357592	1	0.1197	0.0888889	0.07852	1	0.319715	0.239437	0.118429	1	0.541822	0.567901	0.143042	0.295648	0.692746	0.711864	0.204358
man1a2	0.10988	1	0.300623	0.377358	0.116211	1	0.323208	0.459459	0.12787	1	0.365898	0.423077	0.121932	1	0.343982	0.277778	0.0844841	1	0.214542	0.166667	0.049299	0.0936053	0.108835	0.0493827	0.0329971	1	0.0663047	0.0444444	0.0374619	1	0.0774804	0.0384615	0.0716329	1	0.17396	0.133333	0.0793307	1	0.198014	0.183099	0.0958799	1	0.252245	0.333333	0.121239	1	0.341448	0.40678	0.203479
eml2	0.0262683	1	0.0734368	0.0943396	0.0179997	1	0.0465564	0.0810811	0	0.0858337	0	0	0.0161659	0.126866	0.0409427	0.0333333	0.0240633	1	0.0660346	0.0416667	0.0109318	0.00768775	0.0257372	0.0123457	0	0.590401	0	0	0.0473996	1	0.151583	0.0961538	0.147904	1	0.647023	0.377778	0.0463653	1	0.147485	0.15493	0.0609708	1	0.207626	0.320988	0.0982238	1	0.380534	0.423729	0.203451
smim14	0.0450073	1	0.169022	0.226415	0.0462616	1	0.174885	0.297297	0.0788428	1	0.341667	0.384615	0.0527659	1	0.206005	0.166667	0	1	0	0	0.00943646	0.000518586	0.0257372	0.0123457	0.0154732	1	0.046206	0.0222222	0	0.0140978	0	0	0.0387065	1	0.140276	0.111111	0.017609	1	0.0539236	0.0704225	0.0510427	1	0.197646	0.234568	0.0725265	1	0.307313	0.457627	0.203315
atp2a2b	0.0575075	1	0.440361	0.45283	0.0646835	1	0.510482	0.621622	0.0798802	1	0.666823	0.653846	0.0993913	1	0.88183	0.533333	0.122032	1	1.14947	0.5	0.0421237	6.83787e-07	0.298897	0.160494	0.0352963	0.00914335	0.240386	0.133333	0.0452373	0.195671	0.326493	0.192308	0.0590188	1	0.454921	0.288889	0.109921	1	1.004	0.577465	0.12489	0.235249	1.18455	0.851852	0.140612	0.0721547	1.38234	0.881356	0.203043
hcfc2	0.0455809	1	0.126285	0.169811	0.0738153	1	0.231133	0.432432	0.0966445	1	0.32595	0.403846	0.0565169	1	0.165104	0.166667	0.0567311	1	0.165888	0.125	0.0152194	3.25427e-07	0.0333217	0.0246914	0.0193254	0.0754068	0.0443397	0.0222222	0.0526859	1	0.151231	0.0769231	0.044987	1	0.124247	0.0888889	0.103268	1	0.354947	0.323944	0.165082	0.00210678	0.653561	0.62963	0.16483	0.116105	0.652253	0.677966	0.202813
fjx1	0.0657273	1	0.407198	0.490566	0.064847	1	0.400336	0.513514	0.0499213	1	0.28848	0.365385	0.0485434	0.822178	0.278603	0.155556	0.0254515	1	0.126105	0.0833333	0	1.0636e-14	0	0	0	4.9642e-06	0	0	0.0082553	2.64373e-05	0.0330138	0.0192308	0.012913	0.015156	0.0559199	0.0444444	0.0679256	1	0.424458	0.239437	0.170222	6.66703e-14	1.38821	0.864198	0.165687	1.66103e-08	1.33979	0.898305	0.202314
tex2	0.0564314	1	0.172563	0.264151	0.0592598	1	0.183473	0.27027	0.0477225	1	0.14	0.192308	0.043934	1	0.126344	0.0777778	0.064433	1	0.203832	0.125	0.0405544	1	0.114437	0.0617284	0.0366573	1	0.101044	0.0444444	0.0614004	1	0.191835	0.0769231	0.0449521	1	0.129982	0.0888889	0.0748452	1	0.246324	0.183099	0.0923389	1	0.321947	0.37037	0.0945436	1	0.331833	0.423729	0.201999
si:ch73-41e3.7	0.0346676	1	0.394862	0.433962	0.0403006	1	0.475226	0.540541	0.0270245	1	0.291337	0.365385	0.0119211	5.63768e-16	0.109274	0.0888889	0.0141428	1	0.133819	0.0833333	0.0212475	2.04858e-10	0.217788	0.111111	0.0418023	1	0.497193	0.177778	0.0582901	1	0.752113	0.326923	0.0888314	1	1.28221	0.555556	0.123684	0.185417	1.96423	0.802817	0.142282	5.54165e-11	2.35737	0.938272	0.152733	1.90945e-08	2.58643	0.949153	0.2018
plekhg5a	0.0760284	1	0.370735	0.396226	0.0771528	1	0.377711	0.459459	0.0400237	1	0.166119	0.288462	0.042851	1	0.180737	0.177778	0.035643	1	0.144029	0.0833333	0.0667763	1	0.31459	0.148148	0.0759938	1	0.370521	0.155556	0.110252	1	0.59669	0.326923	0.0848212	1	0.426137	0.266667	0.0474946	1	0.205332	0.169014	0.0928214	1	0.478187	0.506173	0.117576	1	0.648458	0.694915	0.201556
dab2	0.1104	1	2.68952	0.943396	0.0788606	1	1.7475	0.945946	0.0850628	1	1.92442	0.903846	0.0523552	1	1.04311	0.588889	0.059838	1	1.23297	0.541667	0.0334784	8.36137e-11	0.600137	0.296296	0.0297638	7.59808e-07	0.519784	0.2	0.0213748	1.45673e-12	0.347974	0.134615	0.0481436	1	0.939635	0.422222	0.112889	1	2.76814	0.887324	0.1549	6.78139e-09	4.17933	0.950617	0.190179	1.52115e-15	5.47428	0.983051	0.201369
cldn7b	0.0213507	1	0.164501	0.188679	0.025093	1	0.199948	0.297297	0.0387489	1	0.339995	0.365385	0.00876208	6.17806e-10	0.0571036	0.0666667	0	0.166069	0	0	0.00581488	1.04663e-11	0.0353962	0.0246914	0.0235041	1	0.184728	0.0888889	0.0409539	1	0.364018	0.192308	0.0894904	1	0.971997	0.533333	0.060466	1	0.591369	0.43662	0.0959238	0.0111356	1.06241	0.790123	0.117933	1.92e-06	1.38666	0.898305	0.201124
CABZ01117840.1	0.0316346	1	0.252305	0.358491	0.0360986	1	0.296606	0.324324	0.01566	0.00101957	0.107989	0.153846	0.0301036	5.48044e-05	0.237474	0.2	0.0422435	1	0.360023	0.25	0.076733	1	0.760509	0.320988	0.0862773	1	0.882954	0.333333	0.0841061	1	0.854698	0.326923	0.0951321	1	1.00056	0.555556	0.0927866	1	0.969044	0.56338	0.116481	0.128095	1.29888	0.802469	0.115887	1	1.29032	0.847458	0.200792
igf2bp3	0.0350543	1	1.37726	0.754717	0.050011	1	2.13697	0.945946	0.0716281	1	3.35496	0.961538	0.116292	6.86052e-05	6.2395	1	0.118158	1	6.36948	0.958333	0.0495479	0.0955748	2.11235	0.62963	0.0228335	2.3969e-11	0.817338	0.266667	0.0234348	2.17934e-09	0.843414	0.384615	0.0199787	1.99261e-06	0.695848	0.466667	0.0683932	1	3.16452	0.816901	0.123867	3.36169e-05	6.77149	0.987654	0.171868	1.82265e-17	10.3911	1	0.200305
mcm6l	0.0296113	0.0116888	0.495044	0.45283	0.0462881	1	0.857614	0.702703	0.0557871	1	1.08226	0.807692	0.0471444	0.328119	0.877359	0.544444	0.0539275	1	1.03734	0.5	0.0435399	3.04435e-07	0.794943	0.333333	0.04446	0.285163	0.815804	0.355556	0.0521846	0.187491	0.995641	0.365385	0.0975065	1	2.19657	0.8	0.14086	0.000820732	3.5372	0.929577	0.16319	6.70504e-17	4.28897	1	0.163253	4.4214e-08	4.29114	0.966102	0.200123
polr3g	0.0359562	1	0.137432	0.245283	0.0360585	1	0.137913	0.243243	0.00729956	1	0.0204396	0.0384615	0.0163655	0.0251858	0.0529953	0.0555556	0	1	0	0	0.0143458	0.0121673	0.0452963	0.037037	0.0449619	1	0.181086	0.0444444	0.0225169	1	0.0777333	0.0384615	0.0559628	1	0.237848	0.155556	0.0581758	1	0.249689	0.225352	0.083603	1	0.394918	0.395062	0.13235	0.0236972	0.713875	0.644068	0.200114
CU467646.3	1.11022e-16	1	0	0	0.0186415	1	0.0282804	0.0540541	1.11022e-16	1	0	0	1.11022e-16	1	0	0	1.11022e-16	1	0	0	1.11022e-16	1	0	0	1.11022e-16	1	0	0	1.11022e-16	1	0	0	1.11022e-16	1	0	0	1.11022e-16	1	0	0	1.11022e-16	1	0	0	1.11022e-16	1	0	0	0.0319547
si:zfos-1505d6.3	0.00427618	1	0.0459207	0.0566038	0.00251641	1	0.0250068	0.0540541	0.00544712	1	0.0607405	0.0384615	0.000794847	1	0.006806	0.0111111	1.11022e-16	1	0	0	0.00265241	1	0.0265544	0.0123457	1.11022e-16	1	0	0	1.11022e-16	1	0	0	0.00689924	1	0.0799367	0.0444444	0.00216622	1	0.0210839	0.0140845	0.00274769	1	0.0276463	0.0493827	0.0059793	1	0.0676771	0.101695	0.0459337
zp3e	0.0012855	1	0.0205484	0.0377358	0.00204483	1	0.0347433	0.0540541	0.0079819	1	0.166741	0.173077	0.00542316	1	0.106327	0.0888889	0.00264987	1	0.0466709	0.0416667	0.000877628	1	0.0133803	0.0123457	0.00291266	1	0.0519949	0.0222222	0.00615017	1	0.123039	0.0576923	0	1	0	0	0.00314267	1	0.0567197	0.056338	0.00419805	1	0.079098	0.111111	0.0046783	1	0.0896237	0.135593	0.0434255
zp2.6	0.010023	1	0.079525	0.0943396	0	1	0	0	0.011858	1	0.0969693	0.0961538	0.00170693	1	0.0103356	0.0111111	0	1	0	0	0	1	0	0	0	1	0	0	0	1	0	0	0.00829304	1	0.0636668	0.0444444	0	1	0	0	0.00330536	1	0.0219423	0.037037	0.00799512	1	0.0609982	0.0338983	0.0407375
si:ch211-146l10.7	0	1	0	0	0	1	0	0	0	1	0	0	0	1	0	0	0	1	0	0	0	1	0	0	0	1	0	0	0	1	0	0	0	1	0	0	0.00570644	1	0.0147117	0.0140845	0	1	0	0	0.00766689	1	0.0207482	0.0338983	0.0612129
btg4	0.00390692	1	0.0235871	0.0377358	0.00688001	1	0.0454107	0.0540541	0.0189732	1	0.150582	0.0769231	0.00680597	1	0.0448418	0.0222222	0	1	0	0	0.00702568	1	0.0465335	0.0246914	0.00589714	1	0.0379568	0.0222222	0	1	0	0	0.00876904	1	0.0603005	0.0444444	0.00346012	1	0.0205154	0.0140845	0	1	0	0	0.00728435	1	0.048538	0.0677966	0.0291017
zp2.1	0.00439141	1	0.0479092	0.0566038	0.0054146	1	0.0610326	0.135135	0.00337075	1	0.035344	0.0576923	0.00627242	1	0.0723921	0.0444444	0.00479462	1	0.053022	0.0416667	0.00233086	1	0.0231873	0.0123457	0.00913984	1	0.112382	0.0666667	0	1	0	0	0.00517532	1	0.0579203	0.0444444	0.00261822	1	0.0264729	0.0422535	0.00543274	1	0.0612696	0.0740741	0.00725116	1	0.0857115	0.135593	0.0405464
zp2.3	0.00378097	1	0.0457363	0.0754717	0.000912843	1	0.00912042	0.027027	0.00185456	1	0.0202825	0.0384615	0.00356506	1	0.0427488	0.0555556	0	1	0	0	0.00923346	1	0.128995	0.0740741	0.00425326	1	0.0523715	0.0222222	0.00391455	1	0.0475992	0.0192308	0.00532907	1	0.0679564	0.0444444	0	1	0	0	0.00348893	1	0.0417026	0.0740741	0.0018583	1	0.0203289	0.0508475	0.0537514
zgc:171977	0.00734841	1	0.0236853	0.0377358	0.00544317	1	0.016707	0.027027	0.00260122	1	0.00714929	0.0192308	1.11022e-16	1	0	0	0.0149227	1	0.0545843	0.0416667	1.11022e-16	1	0	0	1.11022e-16	1	0	0	0.00967034	1	0.0326716	0.0192308	1.11022e-16	1	0	0	1.11022e-16	1	0	0	0.00564064	1	0.0174116	0.0246914	0.0063477	1	0.0199712	0.0338983	0.0482297
zp3a.1	0.000825544	1	0.0105792	0.0188679	0.00409532	1	0.0650916	0.108108	0.0048297	1	0.0787327	0.0769231	0.00201359	1	0.0289088	0.0222222	0	1	0	0	0.00181293	1	0.0256628	0.0123457	0	1	0	0	0	1	0	0	0.00237717	1	0.0349158	0.0222222	0	1	0	0	0.00432263	1	0.0692714	0.123457	0.00265292	1	0.0395703	0.0847458	0.0706444
zp2.5	0.00443792	1	0.122155	0.150943	0.00377488	1	0.101389	0.108108	0.00599782	1	0.173106	0.0961538	0.00345119	1	0.0914698	0.0666667	0.00194305	1	0.0474921	0.0416667	0.00280355	1	0.0720996	0.037037	0.00586044	1	0.168511	0.0444444	0.00159214	1	0.0378976	0.0192308	0.00260021	1	0.0661601	0.0444444	0.00334765	1	0.0883292	0.0985915	0.00213012	1	0.0527188	0.0987654	0.0106118	1	0.337439	0.20339	0.0597495
si:ch73-78o10.1	0.00744508	1	0.00963295	0.0188679	0.0163967	1	0.0244628	0.0540541	0	1	0	0	0.00809862	1	0.0106285	0.0111111	0	1	0	0	0.0186648	1	0.0285657	0.0123457	0	1	0	0	0	1	0	0	0	1	0	0	0	1	0	0	0.014749	1	0.0215608	0.0246914	0	1	0	0	0.0477278
si:ch211-125e6.12	0.00366264	1	0.0299215	0.0566038	0.00899895	1	0.0849272	0.135135	0.00591195	1	0.0520112	0.0961538	0	0.0934985	0	0	0	1	0	0	0.00218225	1	0.0165562	0.0123457	0	1	0	0	0.00952743	1	0.0908138	0.0384615	0.0125347	1	0.125519	0.0888889	0.00566276	1	0.0494759	0.056338	0.00650974	1	0.0581731	0.0864198	0.0127396	1	0.127953	0.237288	0.0549495
si:ch211-125e6.13	0.00531816	1	0.00928633	0.0188679	0	1	0	0	0.0102954	1	0.0200824	0.0384615	0.00406337	1	0.006806	0.0111111	0	1	0	0	0	1	0	0	0	1	0	0	0	1	0	0	0	1	0	0	0	1	0	0	0.0188419	1	0.0411857	0.0617284	0.0135208	1	0.0277181	0.0677966	0.0765805
zp3.2	0.00858333	1	0.310449	0.301887	0.00804137	1	0.287622	0.378378	0.0105272	1	0.39462	0.211538	0.00668409	1	0.231798	0.211111	0	1	0	0	0.0015001	1.19832e-05	0.0418268	0.0246914	0.00479816	1	0.157805	0.0666667	0.00344811	1	0.107873	0.0769231	0.00501681	1	0.166148	0.0888889	0.0123412	1	0.476141	0.295775	0.00883273	1	0.321051	0.308642	0.018018	1	0.747204	0.661017	0.0643387
zp3a.2	0.00744662	1	0.223221	0.320755	0.0105308	1	0.335176	0.351351	0.00786337	1	0.237886	0.211538	0.00365063	1	0.0977881	0.0888889	0.00146549	1	0.0345876	0.0416667	0.0060307	1	0.17461	0.0987654	0	0.283473	0	0	0.00548132	1	0.156292	0.0769231	0.00764854	1	0.230307	0.177778	0.0019507	1	0.047814	0.0422535	0.00497946	1	0.139848	0.17284	0.0109377	1	0.350498	0.372881	0.0790911
zp3.2.1	0.0208462	1	0.0502206	0.0188679	0.00612916	1	0.0118229	0.027027	0.025185	1	0.0631051	0.0576923	0.00545866	1	0.0103356	0.0111111	0	1	0	0	0.00546886	1	0.010358	0.0123457	0	1	0	0	0	1	0	0	0	1	0	0	0.0293271	1	0.0759328	0.056338	0.0058968	1	0.0113039	0.0246914	0.00745263	1	0.0148466	0.0338983	0.0506465
si:dkeyp-46h3.8	0.00581057	1	0.0158571	0.0188679	0.0113664	1	0.0347778	0.0540541	0	1	0	0	0.0061956	1	0.0170839	0.0222222	0	1	0	0	0	1	0	0	0	1	0	0	0	1	0	0	0.0202334	1	0.0691371	0.0444444	0.0229448	1	0.0804519	0.0704225	0.0190688	1	0.0643843	0.111111	0.0113516	1	0.0347242	0.0677966	0.0673169
zgc:171474	0.0119765	1	0.0629513	0.0943396	0.00274295	1	0.0113726	0.027027	0.0117365	1	0.0614623	0.0384615	1.11022e-16	1	0	0	1.11022e-16	1	0	0	1.11022e-16	1	0	0	0.0164575	1	0.0918474	0.0444444	0.00777823	1	0.0378976	0.0192308	0.00574206	1	0.0266141	0.0222222	1.11022e-16	1	0	0	0.00472367	1	0.0212305	0.0246914	0.0153081	1	0.0842469	0.186441	0.083963
zgc:175135	0.00644338	1	0.0357309	0.0377358	0	1	0	0	0	1	0	0	0.00300418	1	0.0148187	0.0222222	0	1	0	0	0	0.352339	0	0	0	1	0	0	0.00622624	1	0.0343344	0.0192308	0	1	0	0	0.0110413	1	0.0671546	0.0704225	0.0179761	1	0.119868	0.17284	0.0483904	1	0.401075	0.457627	0.0718572
zgc:173856	0.00512675	1	0.0303523	0.0188679	0.00949002	1	0.0622262	0.108108	0.00167463	1	0.00843963	0.0192308	0.00543251	1	0.0324581	0.0111111	0	1	0	0	0.00441599	1	0.0255455	0.0123457	0.00616758	1	0.0376081	0.0222222	0.0062084	1	0.0378976	0.0192308	0	1	0	0	0.00168913	1	0.0085224	0.0140845	0.00351124	1	0.0196228	0.037037	0.0171645	1	0.125608	0.20339	0.100997
CABZ01059627.1	0	1	0	0	0	1	0	0	0	1	0	0	0	1	0	0	0	1	0	0	0.00521768	1	0.0096494	0.0123457	0	1	0	0	0.0137372	1	0.0300052	0.0192308	0	1	0	0	0.0281869	1	0.0711757	0.0422535	0.00576351	1	0.0108288	0.0246914	0.0660113	1	0.204134	0.135593	0.0579648
thy1	0.0197936	1	0.233263	0.264151	0.0242398	1	0.297833	0.378378	0.0253928	1	0.315078	0.442308	0.0131545	1	0.143222	0.144444	0.0198732	1	0.23439	0.208333	0.0153972	1	0.172703	0.111111	0.0148521	1	0.165444	0.0666667	0.00703155	1	0.0685779	0.0192308	0.00728441	1	0.0714632	0.0666667	0.0119888	1	0.128314	0.112676	0.00951221	1	0.0976765	0.148148	0.0176867	1	0.203806	0.186441	0.0434177
si:ch211-146l10.8	0.00445488	1	0.0218231	0.0377358	0.00463293	1	0.0228328	0.0540541	0.00687672	1	0.0360993	0.0576923	0.0104032	1	0.0586312	0.0444444	0	1	0	0	0.0106197	1	0.0600718	0.0246914	0.00849429	1	0.046206	0.0222222	0.00437986	1	0.0213998	0.0192308	0	1	0	0	0.00440123	1	0.0215203	0.028169	0.0144671	1	0.0866285	0.148148	0.0338522	1	0.24166	0.355932	0.0943422
si:dkey-90l23.1	0.00208934	0.230409	0.0275237	0.0377358	0.00786811	1	0.126753	0.243243	0.00199122	0.286709	0.0260601	0.0384615	0.00482467	0.0333821	0.0717941	0.0777778	0.0105021	1	0.177894	0.0833333	0.00689075	0.542952	0.108572	0.0740741	0.00359062	1	0.0510863	0.0222222	0.00640101	1	0.0996409	0.0576923	0.0103168	1	0.174202	0.133333	0.0177064	1	0.330802	0.253521	0.0329121	1	0.700501	0.592593	0.0356813	0.274417	0.773445	0.762712	0.0719959
zgc:173545.1	0	1	0	0	0	1	0	0	0	1	0	0	0.00902203	1	0.00865578	0.0111111	0	1	0	0	0	1	0	0	0	1	0	0	0	1	0	0	0.0259472	1	0.0304995	0.0222222	0	1	0	0	0.0221696	1	0.0252129	0.037037	0.0421075	1	0.0551796	0.0677966	0.0929826
LO018315.6	0.0148028	1	0.0133928	0.0188679	0.0135184	1	0.0120229	0.027027	0	1	0	0	0	1	0	0	0	1	0	0	0	1	0	0	0	1	0	0	0	1	0	0	0	1	0	0	0.0296161	1	0.0308736	0.028169	0.0269561	1	0.0275325	0.0493827	0.03809	1	0.0420227	0.0847458	0.0924969
si:ch211-226h8.6	0.00400107	1	0.00759273	0.0188679	0.00646081	1	0.0132188	0.027027	0.0146298	1	0.0345688	0.0576923	0	1	0	0	0	1	0	0	0	1	0	0	0	1	0	0	0.0186795	1	0.046288	0.0192308	0.0263853	1	0.0702179	0.0444444	0.0218902	1	0.0560155	0.056338	0.015061	1	0.0357851	0.0617284	0.0438887	1	0.131032	0.186441	0.0781373
si:ch211-226h8.4	0.00360136	1	0.0113085	0.0188679	0.00948592	1	0.0348147	0.0540541	0.00607805	1	0.0206972	0.0384615	0.00572869	1	0.0193225	0.0222222	0	1	0	0	0	1	0	0	0	1	0	0	0	1	0	0	0.0153901	1	0.0617226	0.0444444	0.00617567	1	0.0210839	0.0140845	0.0199006	1	0.083954	0.135802	0.0281652	1	0.127779	0.220339	0.114646
zgc:175135.1	0.00301208	1	0.0178823	0.0377358	0.00529847	1	0.0342556	0.0540541	0.0104135	1	0.075406	0.115385	0.00384117	0.0787393	0.0236344	0.0222222	0.00790739	1	0.0545843	0.0416667	0.00508451	0.0989565	0.0326596	0.0123457	0.00725281	1	0.0493437	0.0222222	0.00678517	1	0.0456545	0.0384615	0.0136068	1	0.103463	0.0888889	0.012455	1	0.0931612	0.0985915	0.0231954	1	0.195972	0.271605	0.0459187	0.782835	0.45211	0.59322	0.0866975
qdprb2.1	0.00544221	1	0.0092899	0.0188679	0.00773616	1	0.0139883	0.027027	0.0139493	1	0.0280169	0.0576923	0	1	0	0	0.0225328	1	0.0497515	0.0416667	0	1	0	0	0	1	0	0	0.012381	1	0.0243212	0.0192308	0.0179975	1	0.03797	0.0222222	0	1	0	0	0.0103744	1	0.0197374	0.037037	0.0281449	1	0.0651419	0.118644	0.103978
wu:fi42e03	0.00428113	1	0.0266511	0.0377358	0.00209088	1	0.0117382	0.027027	0.00451714	1	0.0283525	0.0576923	0.00538018	1	0.0347043	0.0333333	0	1	0	0	0	0.0203077	0	0	0	1	0	0	0.00851008	1	0.0592057	0.0384615	0.0105425	1	0.0761482	0.0444444	0.00526815	1	0.0338688	0.028169	0.0193099	1	0.156402	0.185185	0.0242182	1	0.205499	0.338983	0.125637
zp3	0.0057624	1	0.101781	0.150943	0.0137384	1	0.282115	0.297297	0.0125712	1	0.253917	0.307692	0.0145048	1	0.30092	0.233333	0.0171035	1	0.366287	0.208333	0.0102861	1	0.200348	0.0987654	0.00641763	1	0.115347	0.0444444	0.00595106	1	0.105659	0.0576923	0.0125608	1	0.253667	0.177778	0.00856159	1	0.161495	0.15493	0.0165839	1	0.353025	0.444444	0.026661	1	0.625359	0.576271	0.0946387
zgc:152652	0.0105653	1	0.0575262	0.0566038	0.00364839	1	0.016707	0.027027	0.0118591	1	0.0659312	0.0961538	0.00702435	1	0.035651	0.0333333	0	1	0	0	0	0.460544	0	0	0.00735363	1	0.0376081	0.0222222	0	1	0	0	0	1	0	0	0.00310711	1	0.0138969	0.0140845	0.00891453	1	0.0471091	0.0864198	0.0284032	1	0.187902	0.254237	0.128905
si:ch211-226h8.14	0.00490236	1	0.120771	0.150943	0.00252369	1	0.0563558	0.135135	0.013705	1	0.402502	0.25	0.00330965	2.89143e-05	0.0768348	0.0888889	0.00815902	1	0.218404	0.125	0.00508245	0.00203287	0.125916	0.0864198	1.11022e-16	8.01935e-05	0	0	0.00849689	1	0.229032	0.115385	0.00955574	1	0.262875	0.2	0.0133507	1	0.39018	0.267606	0.0329257	0.0199985	1.1574	0.790123	0.0491496	1.5645e-05	1.89767	0.864407	0.0883479
si:dkey-240e12.6	0.00581405	1	0.0590126	0.0943396	0.00828634	1	0.0891901	0.162162	0.00891821	1	0.0972123	0.134615	0.00805095	1	0.0862319	0.0666667	0.00512189	1	0.0509508	0.0416667	0.0024711	0.00321017	0.0220645	0.0123457	0.00490561	1	0.0484708	0.0222222	0	0.0711493	0	0	0.0125823	1	0.145857	0.0888889	0.0130579	1	0.152413	0.126761	0.0173983	1	0.214527	0.246914	0.0382646	1	0.558217	0.576271	0.111246
si:dkeyp-98a7.5	0	1	0	0	0.0134101	1	0.0251913	0.027027	0	1	0	0	0	1	0	0	0	1	0	0	0	1	0	0	0	1	0	0	0	1	0	0	0.0172869	1	0.0340925	0.0222222	0.012196	1	0.0225116	0.028169	0.0299531	1	0.0662167	0.111111	0.0507803	1	0.126933	0.20339	0.106628
si:ch1073-263o8.2	0.00458855	1	0.0118171	0.0188679	0.0195369	1	0.0649228	0.135135	0.0123805	1	0.0376843	0.0576923	0.0120872	1	0.03663	0.0333333	0	1	0	0	0.0159895	1	0.0510756	0.0246914	0	1	0	0	0	1	0	0	0.0476513	1	0.192856	0.133333	0.0288502	1	0.104027	0.084507	0.0457087	1	0.183141	0.209877	0.0365241	1	0.138829	0.220339	0.0428709
si:dkey-241l7.6	0.00330998	1	0.0507081	0.0754717	0.00337135	1	0.0517875	0.108108	0.00716296	1	0.123783	0.0576923	0.00783844	1	0.13752	0.1	1.11022e-16	1	0	0	0.00477139	0.0118024	0.0772398	0.037037	0.00800462	1	0.140936	0.0666667	0.00678973	1	0.116297	0.0576923	0.00923558	1	0.16666	0.111111	0.0102736	1	0.1889	0.15493	0.0213609	1	0.45161	0.45679	0.0419356	0.177994	1.02844	0.711864	0.115108
cldnd	0.0035534	1	0.287463	0.377358	0.00177342	0.314522	0.130133	0.189189	0.00323111	0.819656	0.257765	0.288462	0.00253953	8.11674e-10	0.195729	0.144444	0.00141322	1	0.100662	0.0833333	0.00123213	1.96652e-15	0.0862399	0.037037	0.000761741	2.68748e-07	0.0502676	0.0222222	0.00341218	0.00285222	0.274392	0.134615	0.0101113	1	0.968811	0.488889	0.0226361	1	2.53096	0.84507	0.0395547	3.50668e-12	5.00019	0.987654	0.0534088	5.83764e-13	7.25843	1	0.097139
si:dkey-152b24.6	1.11022e-16	0.0443784	0	0	0.00250525	1	0.0188914	0.027027	0.0113595	1	0.108938	0.0576923	0.00417003	0.0202315	0.0338716	0.0333333	1.11022e-16	1	0	0	1.11022e-16	1.3701e-05	0	0	1.11022e-16	0.426644	0	0	1.11022e-16	0.058943	0	0	0.0184013	1	0.193378	0.111111	0.0386009	1	0.475616	0.366197	0.0369315	1	0.450425	0.469136	0.0553204	0.0728396	0.743484	0.644068	0.0815798
zpax4	0.00444826	1	0.0374327	0.0566038	0.0124488	1	0.124535	0.189189	0.00819944	1	0.0761745	0.115385	0.00452219	0.000711224	0.0381514	0.0333333	1.11022e-16	1	0	0	0.00303273	6.7672e-05	0.0241063	0.0123457	1.11022e-16	0.0451408	0	0	0.0170124	1	0.180586	0.0769231	0.0301549	1	0.360466	0.244444	0.0328095	1	0.399615	0.309859	0.0280707	1	0.330343	0.407407	0.0550574	0.439277	0.758165	0.644068	0.0893936
si:dkey-208k4.2	0.012996	1	0.470009	0.45283	0.00906071	1	0.307134	0.459459	0.0164247	1	0.62103	0.326923	0.00334968	0.0185485	0.0968852	0.1	0.00435917	1	0.131158	0.125	0.00369166	0.00503573	0.108322	0.0617284	0.00476123	1	0.145216	0.0666667	0.00679569	1	0.21941	0.115385	0.00975594	1	0.335003	0.2	0.0121205	1	0.432739	0.28169	0.00740665	1	0.242582	0.308642	0.0258379	1	1.07129	0.457627	0.146311
si:dkeyp-46h3.3	0.0210005	1	0.103606	0.0754717	0.0323719	1	0.175169	0.216216	0.0147448	1	0.0678452	0.0384615	0.00774242	1	0.0317415	0.0333333	0	1	0	0	0.00619972	1	0.0244989	0.0123457	0	1	0	0	0.0268813	1	0.139655	0.0769231	0.061601	1	0.388931	0.244444	0.033381	1	0.181876	0.197183	0.01377	1	0.0625458	0.0864198	0.0455501	1	0.266788	0.305085	0.0463413
cntd2	0.00810831	1	0.0642609	0.0754717	0.00630689	1	0.0479365	0.0540541	0.0100537	1	0.0827092	0.0961538	0.0118	1	0.0999092	0.0777778	0.0152586	1	0.135551	0.0833333	0.022306	1	0.213708	0.111111	0.0275893	1	0.276469	0.133333	0.0157421	1	0.140686	0.0769231	0.0078899	1	0.0622406	0.0444444	0.0133612	1	0.115751	0.112676	0.00636418	1	0.0484433	0.0864198	0.0239518	1	0.232903	0.20339	0.125381
si:ch73-189n23.1	0.00293222	1	0.0194748	0.0377358	0.011704	1	0.097203	0.135135	0.016783	1	0.149184	0.173077	0.00107084	1.94061e-05	0.00621799	0.0111111	0	1	0	0	0.00700174	0.0509619	0.0531844	0.0246914	0.0163718	1	0.144827	0.0666667	0.00931917	1	0.0743157	0.0384615	0.0128036	1	0.108103	0.0666667	0.0209361	1	0.194496	0.15493	0.032455	1	0.331097	0.407407	0.0491411	1	0.552396	0.559322	0.113274
si:dkey-43p13.5	0.0116398	1	0.0621435	0.0943396	0.00884485	1	0.0449776	0.0810811	0.0110232	1	0.0582753	0.0961538	0.00729397	1	0.0358956	0.0222222	0.0111154	1	0.0588507	0.0416667	0.0164982	1	0.0940552	0.0493827	0.00751329	1	0.0371589	0.0222222	0.0348218	1	0.232249	0.134615	0.0126854	1	0.0688033	0.0666667	0.0154062	1	0.0866755	0.0985915	0.00317463	1	0.0137245	0.0246914	0.0168102	1	0.0961843	0.152542	0.133917
zgc:136254	0.0099198	1	0.162534	0.169811	0.00930626	1	0.150782	0.216216	0.00939078	1	0.152392	0.0961538	0.00562696	3.36554e-06	0.0838262	0.0666667	0	1	0	0	0.0131143	0.575084	0.226026	0.111111	0.00947585	1	0.154015	0.0666667	0.022088	1	0.421618	0.192308	0.0368985	1	0.787568	0.355556	0.0362682	1	0.771059	0.521127	0.0263402	1	0.521727	0.530864	0.0414935	1	0.910166	0.79661	0.0926644
tecrl2b	0.0211783	1	0.0330133	0.0566038	0.053231	1	0.102165	0.162162	1.11022e-16	1	0	0	1.11022e-16	1	0	0	0.0320513	1	0.0545843	0.0416667	0.0160249	1	0.0236325	0.0123457	1.11022e-16	1	0	0	0.0170618	1	0.0254706	0.0192308	0.022174	1	0.0348933	0.0222222	0.00864108	1	0.0113854	0.0140845	0.00420638	1	0.00493297	0.0123457	0.0120149	1	0.0167844	0.0338983	0.111125
zp2l1	0.018278	1	0.0843705	0.113208	0.0259405	1	0.128684	0.216216	0.00812667	1	0.0323207	0.0576923	0.00756308	1	0.0297156	0.0333333	0.0135135	1	0.0588507	0.0416667	0.00790654	1	0.0312989	0.0246914	0.0298926	1	0.152911	0.0666667	0.0110321	1	0.046288	0.0192308	0.03124	1	0.161366	0.133333	0.0170123	1	0.0774253	0.084507	0.0181763	1	0.0838084	0.123457	0.0264089	1	0.131509	0.220339	0.104486
mt2	0.0116159	1	0.15136	0.226415	0.00217935	1	0.0218133	0.0540541	0.0197489	1	0.284856	0.288462	0.0154251	1	0.211932	0.166667	0.0145662	1	0.197954	0.166667	0.0114035	0.0730597	0.148095	0.0740741	1.11022e-16	0.000845796	0	0	0.00296944	0.00629127	0.0310419	0.0192308	0.0159058	1	0.219832	0.133333	0.0203827	1	0.295884	0.239437	0.0362259	1	0.595252	0.580247	0.0539272	0.26027	0.974535	0.694915	0.108613
si:dkey-229d11.5	0.0208065	1	0.0586527	0.0754717	0.0240737	1	0.0699415	0.027027	0.00837442	1	0.0199186	0.0384615	0.0212093	1	0.0600229	0.0666667	0	1	0	0	0.0141865	1	0.0370967	0.0246914	0	1	0	0	0.0170002	1	0.0460279	0.0384615	0.0582687	1	0.207639	0.155556	0.0406441	1	0.13264	0.140845	0.0561366	1	0.198164	0.234568	0.0252185	1	0.0739892	0.152542	0.0498712
AL929192.1	1.11022e-16	1	0	0	0.00690052	1	0.0240459	0.027027	1.11022e-16	1	0	0	0.00324147	0.159139	0.010045	0.0111111	1.11022e-16	1	0	0	1.11022e-16	0.0116845	0	0	1.11022e-16	1	0	0	1.11022e-16	1	0	0	0.024399	1	0.107595	0.0888889	0.0343619	1	0.163288	0.0985915	0.0549312	1	0.291897	0.345679	0.0665764	1	0.371634	0.491525	0.106515
ca15b	0.00412747	1	0.0133928	0.0188679	0.0036044	1	0.0114602	0.027027	0.0167144	1	0.0689593	0.0384615	0.0104538	1	0.0395164	0.0444444	0.0115888	1	0.0446273	0.0416667	0.00448606	1	0.0147427	0.0123457	0.010166	1	0.0382382	0.0222222	0	1	0	0	0.00911435	1	0.0336315	0.0222222	0.00413954	1	0.0134379	0.0140845	0.0211385	1	0.0913987	0.123457	0.0336677	1	0.160865	0.271186	0.160406
buc2l	0.019647	1	0.0481843	0.0754717	0.0552543	1	0.170993	0.243243	0.035885	1	0.100146	0.115385	0.00924194	1	0.01968	0.0222222	0	1	0	0	0	1	0	0	0	1	0	0	0.0289065	1	0.0768695	0.0576923	0.0375574	1	0.105915	0.0888889	0.0105688	1	0.0230445	0.028169	0.00878462	1	0.0185422	0.037037	0.014704	1	0.0340728	0.0677966	0.107674
zgc:173443	0.009194	1	0.0568781	0.0754717	0.0131893	1	0.0870725	0.135135	0.00898034	1	0.0553298	0.115385	0.00647718	1	0.0377707	0.0444444	0.00615269	1	0.0355794	0.0416667	0.00925083	1	0.0572911	0.037037	0.0143773	1	0.0964657	0.0666667	0.0309684	1	0.243122	0.153846	0.0594258	1	0.5447	0.288889	0.0181889	1	0.12773	0.126761	0.0237839	1	0.176404	0.197531	0.0597269	1	0.548166	0.491525	0.0851006
si:dkey-37o8.1	0.00326905	0.375962	0.135407	0.188679	0.0052279	1	0.232536	0.351351	0.0120756	1	0.619204	0.25	0.00714952	0.00439573	0.334553	0.188889	0.00534917	1	0.238794	0.166667	0.00464922	3.26429e-06	0.203042	0.0987654	0.00519167	0.728853	0.230671	0.111111	0.00515009	0.446649	0.228535	0.134615	0.0302578	1	1.86577	0.666667	0.0197572	1	1.11362	0.478873	0.0352905	1	2.25236	0.716049	0.0443483	0.0121548	2.98542	0.932203	0.138294
si:ch73-160p18.4	0.039842	1	0.0582215	0.0754717	0.0290361	1	0.0395046	0.0540541	0.0516114	1	0.0802614	0.134615	0.0254524	1	0.0336604	0.0333333	1.11022e-16	1	0	0	0.0207076	1	0.0262355	0.0123457	1.11022e-16	1	0	0	1.11022e-16	1	0	0	1.11022e-16	1	0	0	0.0172587	1	0.0210839	0.0140845	1.11022e-16	1	0	0	0.015405	1	0.018409	0.0338983	0.125568
si:ch1073-75o15.3	0.00999774	1	0.0383555	0.0377358	0.005729	1	0.0200133	0.0540541	0	1	0	0	0	0.000323547	0	0	0	1	0	0	0	0.00251402	0	0	0.0127442	1	0.0510863	0.0222222	0	1	0	0	0.0349609	1	0.172343	0.111111	0.0419654	1	0.215812	0.197183	0.0507749	1	0.273402	0.345679	0.0553449	1	0.304466	0.40678	0.117484
tph1a	1.11022e-16	1	0	0	1.11022e-16	1	0	0	0.0140296	1	0.0400263	0.0384615	0.0104506	1	0.0282489	0.0222222	1.11022e-16	1	0	0	0.0167582	1	0.0494686	0.0246914	1.11022e-16	1	0	0	1.11022e-16	1	0	0	1.11022e-16	1	0	0	0.014234	1	0.0407206	0.0422535	0.0108072	1	0.0293885	0.0617284	0.0758299	1	0.316508	0.355932	0.160298
si:dkeyp-98a7.8	0.013224	1	0.0788886	0.0943396	0.0148467	1	0.0905225	0.135135	0	0.453088	0	0	0.002237	0.00264139	0.010045	0.0111111	0	1	0	0	0	0.000342957	0	0	0	1	0	0	0.0100396	1	0.0569699	0.0384615	0.0251238	1	0.170257	0.0888889	0.0445982	1	0.343928	0.239437	0.0383908	1	0.285789	0.246914	0.0829923	0.000481957	0.750592	0.644068	0.111293
si:dkey-241l7.5	0.00693837	1	0.084531	0.113208	0.00482392	1	0.0554401	0.108108	0.00949804	1	0.122072	0.134615	0.0081914	0.0517878	0.10262	0.1	0.011191	1	0.148088	0.125	0.0222588	1	0.336367	0.148148	0.00573317	0.30082	0.0677109	0.0222222	0.0161252	1	0.228463	0.115385	0.0104152	1	0.136057	0.0444444	0.0159766	1	0.225953	0.253521	0.0327144	1	0.537056	0.580247	0.0540615	0.174604	0.999474	0.762712	0.155972
zgc:195245	0.0322428	1	0.405674	0.45283	0.0315574	1	0.395156	0.459459	0.0503345	1	0.702966	0.596154	0.0225286	1	0.262423	0.211111	0.0127081	1	0.13234	0.0833333	0.0195248	1	0.220886	0.111111	0.0272004	1	0.329707	0.111111	0.0350926	1	0.450034	0.230769	0.0222404	1	0.258377	0.155556	0.0155986	1	0.168844	0.169014	0.00546273	0.0158175	0.0492265	0.0864198	0.0260258	1	0.312497	0.372881	0.0983267
si:dkeyp-98a7.9	0.00370072	0.0153839	0.0576569	0.0943396	0.00505626	1	0.0826251	0.162162	0.00685456	0.371981	0.117634	0.115385	0.00535673	2.04737e-07	0.0883352	0.0777778	1.11022e-16	0.469712	0	0	1.11022e-16	2.74138e-14	0	0	1.11022e-16	8.25685e-06	0	0	0.00814819	0.112533	0.14395	0.0769231	0.0348854	1	0.820133	0.377778	0.0495295	1	1.26476	0.647887	0.0509862	0.00171918	1.31127	0.82716	0.0671112	4.63871e-07	1.85087	0.932203	0.124416
MCHR2.1	0	1	0	0	0	1	0	0	0	1	0	0	0.0293502	1	0.0129629	0.0111111	0	1	0	0	0	1	0	0	0	1	0	0	0	1	0	0	0	1	0	0	0	1	0	0	0.056529	1	0.0291248	0.0493827	0.122694	1	0.0782238	0.0847458	0.128122
zgc:171750	0.0129144	1	0.0144756	0.0188679	0.0231823	1	0.0291514	0.0540541	0.0120385	1	0.0133203	0.0192308	0	1	0	0	0.0729091	1	0.120155	0.0833333	0	1	0	0	0	1	0	0	0	1	0	0	0	1	0	0	0.00829308	1	0.00859079	0.0140845	0.00981089	1	0.0104639	0.0246914	0.0557152	1	0.0856381	0.101695	0.158474
h1m	0.00500555	0.397952	0.195649	0.226415	0.00457514	1	0.176344	0.243243	0.00777588	0.00814118	0.326499	0.134615	0.00401076	3.67321e-10	0.151516	0.1	0.00155288	0.998095	0.0513502	0.0416667	0	1.25598e-18	0	0	0.00675929	0.0263801	0.277255	0.0888889	0.00794981	1	0.335054	0.173077	0.0264871	1	1.40388	0.555556	0.0339742	1	1.90202	0.732394	0.0531117	7.64385e-09	3.3056	0.962963	0.0846494	1.99386e-13	5.95307	0.983051	0.136261
si:ch211-12h2.8	0.017726	1	0.437959	0.377358	0.0214969	1	0.552141	0.432432	0.025007	1	0.662858	0.538462	0.0126808	0.113094	0.293892	0.233333	0.0187694	1	0.469032	0.208333	0.0129776	0.00118578	0.302062	0.148148	0.0172873	1	0.425018	0.155556	0.0241565	1	0.635661	0.211538	0.0228219	1	0.593454	0.333333	0.0234638	1	0.613682	0.394366	0.040388	1	1.19117	0.716049	0.0674237	0.000976569	2.25803	0.864407	0.113133
si:dkeyp-98a7.3.1	0.0105525	1	0.0286438	0.0377358	0	1	0	0	0.00327765	1	0.00736691	0.0192308	0	0.00388867	0	0	0.0228091	1	0.071816	0.0416667	0	0.0233058	0	0	0	1	0	0	0.0100606	1	0.0270777	0.0192308	0.0553571	1	0.213422	0.133333	0.0591961	1	0.232127	0.197183	0.0326044	1	0.110876	0.17284	0.0675936	1	0.274309	0.423729	0.124879
si:dkey-241l7.4	0.0134384	1	1.83233	0.886792	0.0116864	1	1.5529	0.864865	0.0147006	1	2.03864	0.942308	0.0196459	1	2.88353	0.855556	0.0189532	1	2.7619	0.833333	0.0325794	1	5.32387	0.82716	0.034648	1	5.74093	0.888889	0.0238546	1	3.64373	0.846154	0.0120181	0.0619904	1.60516	0.666667	0.0136002	1	1.85854	0.816901	0.0242978	1	3.7258	0.962963	0.0523621	0.812082	9.5687	0.983051	0.138127
cth1	0.0289903	1	0.130356	0.169811	0.00313507	1	0.00950062	0.027027	0.0119478	1	0.0450091	0.0769231	0.0353425	1	0.166095	0.122222	0	1	0	0	0.0568396	1	0.299366	0.135802	0.0364446	1	0.17248	0.0888889	0.0513055	1	0.263393	0.134615	0.0374726	1	0.178483	0.133333	0.0322774	1	0.148619	0.112676	0.0211521	1	0.0889846	0.148148	0.0490344	1	0.248949	0.372881	0.0801709
zp3f.1	0.0111115	1	0.235476	0.207547	0.00859632	1	0.174123	0.27027	0.0152139	1	0.341796	0.365385	0.00881128	6.4452e-05	0.179239	0.1	0.00767908	1	0.152584	0.125	0.0131119	0.177082	0.28642	0.135802	0.00956218	1	0.197303	0.0888889	0.0134742	1	0.295835	0.115385	0.0292861	1	0.75229	0.444444	0.0157379	1	0.355877	0.28169	0.0324771	1	0.853558	0.679012	0.0695888	4.8335e-05	2.20129	0.864407	0.166737
zgc:165518	0.023908	1	0.0276361	0.0188679	0.00976159	1	0.00950062	0.027027	0	1	0	0	0	1	0	0	0	1	0	0	0	1	0	0	0	1	0	0	0.0300548	1	0.036491	0.0192308	0	1	0	0	0.0234239	1	0.026961	0.028169	0.0626886	1	0.0906909	0.148148	0.0910729	1	0.145681	0.186441	0.151297
si:ch211-250e5.16	0.00748264	0.689376	0.117261	0.150943	0.00176275	0.0264659	0.0222654	0.0540541	0.00623223	0.0133338	0.0947609	0.0961538	0.00792606	5.11166e-08	0.125422	0.0777778	0.00712497	1	0.110746	0.0833333	0.00341915	2.45121e-10	0.0473806	0.037037	0.00281707	0.000254261	0.0379568	0.0222222	0.0120577	1	0.205437	0.134615	0.0345751	1	0.730013	0.422222	0.0634939	0.273063	1.55328	0.732394	0.0587204	0.00217146	1.40798	0.82716	0.0731723	1.83884e-06	1.85809	0.932203	0.138425
h2af1al	0.00691667	1	0.0555777	0.0943396	0.015928	1	0.148562	0.216216	0.0156746	1	0.145747	0.153846	0.00790769	0.00186356	0.0649816	0.0666667	0.00658455	1	0.0524817	0.0416667	0.00709411	0.000310022	0.0572435	0.037037	0.00653204	0.593497	0.0519949	0.0222222	0.00884647	0.853712	0.0741054	0.0384615	0.0237988	1	0.240647	0.2	0.0288144	1	0.303516	0.28169	0.0579055	1	0.718758	0.580247	0.088606	0.000356044	1.23155	0.745763	0.145699
crp2	0.0156346	1	0.576088	0.490566	0.00976185	1	0.329827	0.459459	0.0105946	0.422175	0.3632	0.288462	0.00808492	2.24485e-07	0.264402	0.211111	0.00960964	1	0.323789	0.166667	0.0146143	0.00308375	0.531588	0.222222	0.0148735	1	0.542831	0.177778	0.0178451	1	0.674716	0.346154	0.0193863	1	0.74519	0.4	0.034412	1	1.49493	0.690141	0.0438106	1	2.01307	0.864198	0.074725	1.08058e-08	3.93041	0.983051	0.156041
zgc:111868	0	0.024866	0	0	0	1	0	0	0.00382874	1	0.014864	0.0192308	0.00241923	3.09985e-05	0.00878908	0.0111111	0	1	0	0	0.00617512	0.00153215	0.0258276	0.0123457	0	0.261119	0	0	0	0.0333955	0	0	0.00991943	1	0.0449529	0.0444444	0.0418401	1	0.254343	0.225352	0.0660687	1	0.449887	0.493827	0.136264	3.53664e-13	1.13852	0.813559	0.127865
zgc:152936	0.0199367	1	0.0403903	0.0754717	0.0206467	1	0.0421265	0.0810811	0.0205335	1	0.0418487	0.0769231	0.0127823	1	0.0237629	0.0222222	0.0320177	1	0.0717248	0.0416667	0.0199859	1	0.0405101	0.0246914	0.0285698	1	0.0624151	0.0222222	0	1	0	0	0.00874591	1	0.015193	0.0222222	0.0230398	1	0.0480819	0.0422535	0.0872897	1	0.251051	0.271605	0.0929099	1	0.271916	0.288136	0.0920033
cldng	0.00749965	7.58615e-06	0.137641	0.169811	0.0146815	1	0.303795	0.405405	0.0268611	1	0.627981	0.596154	0.0271608	1	0.636504	0.422222	0.0243049	1	0.556268	0.375	0.0355572	1	0.884509	0.432099	0.0188806	0.135993	0.410316	0.177778	0.0259275	1	0.601582	0.230769	0.0344025	1	0.849391	0.444444	0.0548371	1	1.51295	0.71831	0.0523717	1	1.42845	0.888889	0.0599634	1	1.69222	0.898305	0.0978554
zgc:171445	0.0584919	1	0.181605	0.207547	0.0777195	1	0.259984	0.27027	0.0271496	1	0.0704361	0.115385	0.0174249	1	0.0412646	0.0222222	0	1	0	0	0.0279273	1	0.072897	0.0493827	0.0148322	1	0.0340464	0.0222222	0.0149674	1	0.0344163	0.0192308	0	1	0	0	0.00904575	1	0.0189784	0.0140845	0.0372234	1	0.1036	0.148148	0.0562725	1	0.173012	0.322034	0.119926
zp3b	0.00652237	1	0.218753	0.320755	0.00596752	1	0.197272	0.216216	0.0109698	1	0.402251	0.307692	0.00693794	1.44281e-07	0.235069	0.2	0.00871558	1	0.306902	0.208333	0.0189872	1	0.772589	0.345679	0.0165076	1	0.653402	0.288889	0.0202701	1	0.835721	0.326923	0.0342409	1	1.57941	0.666667	0.0292592	1	1.30325	0.647887	0.0279235	1	1.23117	0.790123	0.0514246	0.747884	2.61138	0.881356	0.192503
gdf3	0.0449485	1	0.398318	0.471698	0.0353787	1	0.296453	0.405405	0.0312415	1	0.254572	0.307692	0.0319167	1	0.261313	0.211111	0.0345654	1	0.288113	0.208333	0.0313924	1	0.256075	0.111111	0.034721	1	0.289705	0.111111	0.0373094	1	0.316459	0.173077	0.0107819	1	0.0710708	0.0666667	0.0243642	1	0.18815	0.211268	0.0207245	1	0.154771	0.185185	0.0458868	1	0.408657	0.474576	0.126947
si:dkey-241l7.3	0.0227812	1	0.252975	0.264151	0.00588242	1	0.051017	0.0540541	0.0282079	1	0.327768	0.365385	0.0357616	1	0.438071	0.322222	0.0315417	1	0.375607	0.291667	0.0547322	1	0.742283	0.333333	0.0706403	1	1.02314	0.355556	0.0306173	1	0.362205	0.211538	0.0127989	1	0.126936	0.0888889	0.0135984	1	0.136396	0.140845	0.0240406	1	0.269975	0.296296	0.0432467	1	0.553746	0.542373	0.137547
si:dkeyp-98a7.3	0.00509757	1	0.0201542	0.0377358	0.0160373	1	0.0774133	0.135135	0.00236158	0.556751	0.00833429	0.0192308	0.0181479	1	0.0897479	0.1	0	1	0	0	0	2.61979e-06	0	0	0.00862094	1	0.0371589	0.0222222	0.0278934	1	0.150789	0.0769231	0.052315	1	0.327185	0.244444	0.0699274	1	0.471076	0.338028	0.0418349	1	0.247862	0.320988	0.0637518	1	0.419204	0.576271	0.176229
ccna1	0.0171868	1	0.320785	0.396226	0.0199476	1	0.383518	0.540541	0.0230424	1	0.456317	0.5	0.0184336	0.00012799	0.348847	0.288889	0.0142882	1	0.257363	0.208333	0.0206644	3.20642e-05	0.400154	0.222222	0.0274068	1	0.56306	0.222222	0.0288074	1	0.598267	0.307692	0.0785201	1	2.08155	0.688889	0.0773728	0.353554	2.04297	0.816901	0.0652027	0.0046737	1.64519	0.91358	0.0734313	0.0583087	1.91184	0.915254	0.0842143
cx44.2	0.0242027	1	0.0595555	0.0754717	0.0555811	1	0.165576	0.243243	0.0142208	1	0.0314749	0.0384615	0.02248	1	0.054471	0.0333333	0.0291849	1	0.0747551	0.0416667	0	0.00289381	0	0	0	1	0	0	0.014674	1	0.0326716	0.0192308	0.0309202	1	0.0802121	0.0666667	0.0711885	1	0.226072	0.197183	0.0579172	1	0.174338	0.246914	0.0767587	1	0.248727	0.288136	0.132901
ctss2.1	0.0200475	1	0.642531	0.528302	0.016345	1	0.503089	0.621622	0.0257886	1	0.87088	0.807692	0.0299447	1	1.04445	0.6	0.0322431	1	1.14319	0.541667	0.038093	1	1.40276	0.54321	0.0409176	1	1.53211	0.466667	0.0413375	1	1.55156	0.596154	0.0802971	1	3.56653	0.8	0.0491739	1	1.92422	0.788732	0.0341559	1	1.22679	0.802469	0.049538	1	1.94197	0.949153	0.112929
pou5f3	0.0328962	1	0.0926948	0.150943	0.0262507	1	0.0704039	0.108108	0.0167258	1	0.0409143	0.0769231	0.0256925	1	0.0685919	0.0777778	0	1	0	0	0.0548521	1	0.17448	0.0864198	0.0406428	1	0.120215	0.0666667	0.0471852	1	0.144624	0.0769231	0	1	0	0	0.0203028	1	0.0516158	0.056338	0.0434354	1	0.130509	0.185185	0.0472579	1	0.144901	0.237288	0.177163
zar1l	0.0282013	1	0.48066	0.490566	0.0258634	1	0.432687	0.513514	0.0307774	1	0.534708	0.480769	0.0532528	1	1.05219	0.655556	0.0494029	1	0.9582	0.458333	0.0595012	1	1.20899	0.382716	0.0366148	1	0.661492	0.288889	0.0440178	1	0.830257	0.384615	0.0421667	1	0.787261	0.488889	0.0409787	1	0.759943	0.492958	0.037114	1	0.672598	0.679012	0.0436132	1	0.820815	0.694915	0.0992475
si:dkey-46g23.5	0.0331141	1	0.0568154	0.0754717	0.0611999	1	0.121693	0.189189	0.0288023	1	0.0479157	0.0769231	0.0232032	1	0.0368631	0.0444444	0.056736	1	0.110662	0.0833333	0.0249282	1	0.0402045	0.0246914	0.0310782	1	0.0525732	0.0222222	0	1	0	0	0.023778	1	0.03797	0.0222222	0.0659288	1	0.133647	0.140845	0.0425641	1	0.0773833	0.135802	0.0678766	1	0.138648	0.220339	0.113623
zgc:171446	0.0446029	1	0.148058	0.188679	0.0351994	1	0.110562	0.135135	0.0193997	1	0.0536483	0.115385	0.0156468	1	0.0414788	0.0444444	0.0185834	1	0.0509508	0.0416667	0.0207698	1	0.0582358	0.037037	0.0223561	1	0.0636377	0.0222222	0	0.453088	0	0	0.0244686	1	0.0709758	0.0444444	0.0485074	1	0.164318	0.140845	0.0537438	1	0.186719	0.234568	0.101297	1	0.417021	0.474576	0.144623
zpcx	0.00545903	1	0.0208949	0.0377358	0.0089799	1	0.0373305	0.0540541	0.00448759	1	0.0166586	0.0384615	0.00819668	0.00194966	0.033544	0.0333333	0	1	0	0	0.014296	0.101696	0.0646506	0.037037	0	0.104891	0	0	0	0.0116193	0	0	0.10809	1	0.786902	0.4	0.109501	1	0.800187	0.450704	0.0744222	1	0.488174	0.481481	0.0576412	1	0.353735	0.457627	0.122932
zgc:171517	0.0569382	1	1.12904	0.754717	0.0450105	1	0.842328	0.675676	0.0427564	1	0.790397	0.653846	0.0389076	1	0.703492	0.455556	0.0424434	1	0.783245	0.416667	0.0323833	0.107355	0.561539	0.259259	0.0245282	0.0715909	0.400444	0.155556	0.0117284	5.05933e-09	0.16571	0.0576923	0.0338704	1	0.593276	0.4	0.0405223	1	0.739675	0.464789	0.0558768	1	1.10275	0.814815	0.0685295	1	1.42541	0.898305	0.100958
si:dkey-90l23.2	0.00978014	1	0.0790227	0.0943396	0.00647639	1	0.0487933	0.0810811	0.00419789	0.01455	0.0295367	0.0576923	0.00475671	6.6412e-09	0.0341175	0.0333333	0.00493258	1	0.0355794	0.0416667	0.00293684	1.7812e-09	0.0196012	0.0123457	0.00312634	0.010033	0.0210551	0.0222222	0.00425562	0.000851475	0.0300052	0.0192308	0.0597961	1	0.709267	0.311111	0.0728179	1	0.909318	0.492958	0.0931268	7.69532e-09	1.24405	0.851852	0.110721	2.27227e-08	1.55433	0.881356	0.142885
zp3c	0.0203665	1	0.143038	0.150943	0.0139422	1	0.0909295	0.162162	0.0156954	1	0.104699	0.134615	0.00900541	0.000106615	0.0542723	0.0555556	0	1	0	0	0.0229199	1	0.164924	0.0864198	0.0282514	1	0.212522	0.111111	0.0816656	1	0.795985	0.269231	0.142462	6.20624e-07	1.63194	0.755556	0.0962911	1	0.982612	0.535211	0.0456613	1	0.383331	0.432099	0.0372844	1	0.298421	0.355932	0.0537565
si:ch73-132k15.2	0.0309627	1	0.0912303	0.0943396	0.00562063	1	0.0120229	0.027027	0.0130774	1	0.0323523	0.0576923	0.00835494	0.609632	0.0190819	0.0222222	0	1	0	0	0.0180647	1	0.0475488	0.0246914	0	1	0	0	0.015514	1	0.0396401	0.0192308	0.0454976	1	0.146505	0.111111	0.0629597	1	0.219835	0.126761	0.0706049	1	0.254035	0.308642	0.141429	0.000259112	0.620569	0.559322	0.131498
acp5a	0.00899039	2.92917e-05	0.141129	0.150943	0.014237	1	0.242881	0.351351	0.0110639	0.0114706	0.180167	0.25	0.0113155	4.96724e-11	0.185014	0.155556	0.00941752	1	0.149034	0.125	0.0266926	0.0448721	0.516802	0.246914	0.0360031	1	0.744813	0.266667	0.0519107	1	1.17158	0.423077	0.0609194	1	1.43147	0.733333	0.0768661	0.37509	1.92017	0.816901	0.0715743	0.00718628	1.75414	0.901235	0.0966782	7.23309e-07	2.57341	0.966102	0.10594
elovl6l	0.00992132	1	0.0161473	0.0377358	0.0090758	1	0.0145425	0.027027	0.00506054	1	0.00736356	0.0192308	0.00604843	1	0.00905453	0.0111111	1.11022e-16	1	0	0	1.11022e-16	0.205819	0	0	1.11022e-16	1	0	0	0.0311515	1	0.0635686	0.0384615	0.115899	1	0.331313	0.2	0.0580537	1	0.137316	0.126761	0.0267188	1	0.0527284	0.0740741	0.052472	1	0.121005	0.237288	0.1996
kcnc2	0.0123667	1	0.00963295	0.0188679	0.0700335	1	0.0799912	0.135135	1.11022e-16	1	0	0	0.0241773	1	0.0214858	0.0222222	1.11022e-16	1	0	0	1.11022e-16	1	0	0	1.11022e-16	1	0	0	1.11022e-16	1	0	0	0.046622	1	0.0480423	0.0444444	0.0822078	1	0.0980373	0.112676	0.0797465	1	0.0943158	0.148148	0.0824165	1	0.0983545	0.220339	0.147763
LSM2	0.0439468	1	0.315686	0.396226	0.0321439	1	0.214825	0.324324	0.0545976	1	0.413561	0.442308	0.0302102	1	0.199143	0.166667	0.0407497	1	0.287532	0.25	0.0454659	1	0.329267	0.185185	0.0608436	1	0.473697	0.177778	0.0572412	1	0.438777	0.211538	0.0434705	1	0.311454	0.2	0.0307481	1	0.20348	0.197183	0.0330648	1	0.22238	0.283951	0.0442225	1	0.318141	0.423729	0.104157
zgc:77112	0.0199513	1	0.0725752	0.113208	0.0309249	1	0.123415	0.189189	0.0326434	1	0.13185	0.192308	0.0422137	1	0.180898	0.144444	0.0148434	1	0.0509508	0.0416667	0.033185	0.473365	0.134533	0.0493827	0.0279063	1	0.108893	0.0666667	0.0105124	0.228142	0.0338602	0.0192308	0.0478114	1	0.211097	0.155556	0.077373	1	0.386517	0.309859	0.0694635	1	0.337148	0.419753	0.0955138	1	0.505774	0.59322	0.119144
zpax1	0.00218263	4.9572e-08	0.0501441	0.0754717	0.00434318	0.0956007	0.110238	0.189189	0.0103241	0.011705	0.302245	0.211538	0.00900748	1.93394e-08	0.257456	0.177778	0.00346244	0.204388	0.0849432	0.0416667	0.00477462	1.12186e-14	0.122971	0.0493827	0.0115993	0.122636	0.346764	0.155556	0.0168232	0.157374	0.539426	0.173077	0.0615525	1	2.63964	0.755556	0.107769	1.07561e-09	5.38679	0.901408	0.0907419	9.69065e-14	4.31867	1	0.0904785	2.73794e-07	4.30263	0.983051	0.153311
CABZ01075618.1	0.0398796	1	0.0704501	0.0943396	0.0240718	1	0.0380256	0.0810811	0.0154817	1	0.0223816	0.0384615	1.11022e-16	0.0281366	0	0	0.0227834	1	0.0355794	0.0416667	1.11022e-16	0.137281	0	0	0.0285567	1	0.046788	0.0222222	0.0232655	1	0.036491	0.0192308	0.0527378	1	0.0996547	0.0666667	0.0336543	1	0.0571819	0.056338	0.0606467	1	0.118712	0.160494	0.100526	1	0.225655	0.305085	0.181718
lsm14b	0.017291	1	0.444887	0.471698	0.02873	1	0.821048	0.702703	0.0325671	1	0.95682	0.692308	0.0314613	1	0.917243	0.522222	0.0369546	1	1.11729	0.458333	0.03807	1	1.15894	0.419753	0.0483712	1	1.55869	0.466667	0.0449201	1	1.42181	0.538462	0.0290059	1	0.830662	0.4	0.0316897	1	0.925389	0.549296	0.0483673	1	1.55854	0.91358	0.0740178	1	2.65905	0.983051	0.162288
si:dkeyp-46h3.6	0.0414731	1	0.621361	0.471698	0.0242236	1	0.321984	0.432432	0.0245233	1	0.326812	0.326923	0.0255833	0.0866687	0.344006	0.255556	0.0425626	1	0.641604	0.333333	0.0378907	1	0.555845	0.271605	0.0404423	1	0.602344	0.244444	0.0418955	1	0.629192	0.25	0.0663073	1	1.11617	0.488889	0.0647233	1	1.08266	0.619718	0.0632456	1	1.05163	0.753086	0.0777784	0.461176	1.36604	0.864407	0.0973413
zar1	0.0227415	1	1.56207	0.830189	0.014799	1	0.933312	0.837838	0.0176513	0.274519	1.15186	0.692308	0.0119237	7.24225e-18	0.722279	0.466667	0.022433	1	1.53653	0.708333	0.0209327	0.000739404	1.41352	0.592593	0.028313	1	2.03737	0.555556	0.0431521	1	3.41721	0.846154	0.0624717	1	5.42186	0.977778	0.0573495	1	4.8697	1	0.0637406	0.0825477	5.56082	0.987654	0.0822652	3.68715e-05	7.68189	1	0.166229
zgc:113424	0.0198128	1	0.0459121	0.0566038	0.0153846	1	0.0339198	0.0540541	0.0106431	1	0.0219175	0.0384615	0.015038	1	0.0330112	0.0333333	0.0250041	1	0.0607959	0.0416667	0.00868731	0.396765	0.0172634	0.0123457	0.0219699	1	0.0519949	0.0222222	0.017562	1	0.0397298	0.0192308	0.0640632	1	0.1942	0.133333	0.053932	1	0.156481	0.15493	0.0761583	1	0.241666	0.283951	0.106522	1	0.371253	0.305085	0.166114
pif1	0.0205704	1	0.0701646	0.113208	0.0166078	1	0.0542867	0.108108	0.0409897	1	0.162558	0.134615	0.0153343	0.1172	0.0493569	0.0444444	0.0503843	1	0.209981	0.166667	0.0389457	1	0.152616	0.0740741	1.11022e-16	0.203932	0	0	0.0425777	1	0.170378	0.0961538	0.034097	1	0.129606	0.111111	0.0357722	1	0.137462	0.126761	0.0598244	1	0.260291	0.308642	0.100308	0.665403	0.501932	0.610169	0.161757
agmat	0.100793	1	0.184285	0.264151	0.0642807	1	0.103955	0.162162	0.0665363	1	0.108574	0.173077	0.0481193	1	0.0723547	0.0666667	0	1	0	0	0.0181541	1	0.0220346	0.0123457	0	1	0	0	0	1	0	0	0.0182426	1	0.0221634	0.0222222	0.00775386	1	0.00805528	0.0140845	0.0884035	1	0.155757	0.222222	0.0767014	1	0.12998	0.20339	0.126532
si:ch211-195b11.3	0.0868268	1	0.305422	0.283019	0.0483476	1	0.146037	0.216216	0.0625489	1	0.201538	0.211538	0.0613883	1	0.196847	0.166667	0.0380684	1	0.108643	0.0833333	0.0383126	1	0.109502	0.0493827	0.0159796	1	0.0379568	0.0222222	0.0409913	1	0.119021	0.0576923	0.0081297	1	0.017083	0.0222222	0.0601543	1	0.191889	0.15493	0.0425486	1	0.124635	0.197531	0.0586036	1	0.185701	0.271186	0.102386
si:dkey-88l16.5	0.049841	1	0.0708659	0.113208	0.0336261	1	0.0435859	0.108108	0.0171853	1	0.0193447	0.0384615	0	1	0	0	0.0394385	1	0.053022	0.0416667	0.0183567	1	0.020934	0.0123457	0.0524748	1	0.075565	0.0444444	0.10132	1	0.173929	0.0961538	0.0967651	1	0.163946	0.133333	0.0616578	1	0.0924808	0.0985915	0.033388	1	0.043208	0.0740741	0.0502252	1	0.0715469	0.101695	0.0998998
guca1b	0.0356029	1	0.0354823	0.0566038	0.10106	1	0.131575	0.162162	0.0636602	1	0.0730716	0.134615	0.0152635	1	0.0127442	0.0111111	0	1	0	0	0.0587325	1	0.0660355	0.037037	0	1	0	0	0	1	0	0	0.0823741	1	0.101274	0.0666667	0.0640305	1	0.0736072	0.0422535	0	1	0	0	0.0604744	1	0.068503	0.118644	0.143261
si:ch211-145c1.1	0.011742	0.0282608	0.188277	0.245283	0.0281921	1	0.538009	0.540541	0.0165144	1	0.282363	0.326923	0.0121685	1.62677e-10	0.196394	0.155556	0.00719507	0.703348	0.105934	0.0833333	0.00707475	2.03921e-16	0.103871	0.0493827	0.0194063	0.0252229	0.342565	0.133333	0.0561766	1	1.25963	0.365385	0.128851	1.3187e-05	3.63371	0.888889	0.108908	7.45789e-09	2.92222	0.901408	0.07446	0.00497692	1.79647	0.888889	0.0667699	1	1.56508	0.898305	0.0996658
lamp2	0.0309712	1	0.979898	0.735849	0.0456379	1	1.57909	0.972973	0.0589512	1	2.17318	0.961538	0.0316833	1	1.0075	0.544444	0.0294166	1	0.920221	0.458333	0.0207017	9.03405e-10	0.601304	0.271605	0.0202324	0.00109905	0.584944	0.244444	0.013379	3.61035e-08	0.356903	0.192308	0.026927	1	0.82634	0.422222	0.0413885	1	1.39912	0.802817	0.0604863	1	2.24446	0.938272	0.0886482	0.000134197	3.6432	0.983051	0.179407
gpr160	0.0172926	1	0.0408501	0.0377358	0.0217892	1	0.0539196	0.0540541	0.0322859	1	0.0869195	0.173077	0.0461538	1	0.135	0.111111	0.0150423	1	0.0345876	0.0416667	0	1.84487e-05	0	0	0	0.502009	0	0	0	0.0711493	0	0	0.0586817	1	0.182166	0.111111	0.109865	1	0.404668	0.323944	0.0943824	1	0.332817	0.382716	0.0720181	1	0.235804	0.40678	0.159609
epcam	0.0173728	1	0.421786	0.415094	0.0113695	1	0.25482	0.351351	0.0141695	0.0050988	0.330769	0.307692	0.0150471	2.84296e-13	0.35529	0.188889	0.0180738	1	0.442246	0.25	0.022107	2.17292e-05	0.563412	0.259259	0.0289347	1	0.780755	0.288889	0.0403031	1	1.17211	0.519231	0.0886847	1	3.15555	0.844444	0.0772215	1	2.64527	0.859155	0.0803792	4.80297e-05	2.78356	0.962963	0.11465	1.37605e-11	4.39067	1	0.13993
gtf3ab	0.0312662	1	0.525413	0.509434	0.020946	1	0.323236	0.459459	0.0261331	1	0.422346	0.519231	0.0328246	1	0.557616	0.388889	0.0208208	1	0.320911	0.208333	0.0553406	1	1.06414	0.493827	0.0309923	1	0.519798	0.222222	0.0369681	1	0.64518	0.307692	0.0325623	1	0.552166	0.355556	0.0536712	1	1.02416	0.633803	0.0849274	0.0819806	1.82806	0.876543	0.100464	0.00421738	2.26703	0.915254	0.163233
lectin	0.0399389	1	0.215091	0.245283	0.0350722	1	0.183308	0.27027	0.0188802	1	0.0864789	0.0961538	0.00274235	1.17503e-08	0.00908234	0.0111111	1.11022e-16	1	0	0	0.0311117	0.39096	0.158294	0.0617284	0.0379425	1	0.201918	0.0444444	0.0291188	1	0.146013	0.0961538	0.0550775	1	0.320628	0.244444	0.0650641	1	0.395239	0.295775	0.111838	0.000251659	0.789046	0.654321	0.132236	3.89264e-05	0.980622	0.728814	0.118865
CU326366.2	0.0712718	1	0.535844	0.490566	0.0385552	1	0.248853	0.405405	0.0463488	1	0.312479	0.365385	0.0322945	1	0.200204	0.188889	0.0520293	1	0.360836	0.208333	0.0361493	1	0.229886	0.135802	0.0496031	1	0.339986	0.133333	0.0325401	1	0.202068	0.134615	0.0846214	1	0.666469	0.4	0.0864039	1	0.684439	0.422535	0.040845	1	0.267206	0.308642	0.0465734	1	0.314361	0.474576	0.105236
aanat1	0.12452	0.00189539	1.30024	0.716981	0.0731939	1	0.657587	0.540541	0.0530802	1	0.438965	0.538462	0.040688	1	0.315544	0.255556	0	1	0	0	0.0108043	1.77867e-05	0.06384	0.0493827	0.0206909	1	0.138415	0.0666667	0.0084605	0.017607	0.0478924	0.0384615	0.0167557	0.80877	0.107475	0.0444444	0.0187474	0.0803993	0.122945	0.084507	0.0293388	1	0.211277	0.259259	0.0692094	1	0.612618	0.627119	0.191127
larp6b	0.00433943	4.78385e-07	0.10526	0.113208	0.00649971	0.277626	0.168066	0.216216	0.000639433	7.4465e-11	0.0120281	0.0384615	0.00497408	2.03042e-14	0.123228	0.122222	0.00830759	1	0.223815	0.0833333	0.0029695	8.76946e-19	0.0680894	0.0246914	0.00594403	8.01438e-06	0.151482	0.0666667	0.0307996	1	1.07028	0.384615	0.102361	0.000377714	4.81813	0.977778	0.105903	2.48209e-11	5.03397	0.971831	0.100112	1.85598e-14	4.68236	1	0.1096	1.98718e-10	5.26187	1	0.156971
jhy	0.105405	1	0.308664	0.358491	0.0616763	1	0.156034	0.27027	0.0235682	1	0.047699	0.0576923	0.0230166	1	0.0463531	0.0444444	0	1	0	0	0.0753098	1	0.200799	0.0864198	0.0631747	1	0.160817	0.0666667	0.119492	1	0.363003	0.173077	0.113621	1	0.340077	0.266667	0.0364296	1	0.0811015	0.0704225	0.00487838	1	0.00743311	0.0123457	0.0164232	1	0.0309046	0.0677966	0.0564979
chia.4	0.0343097	1	0.430837	0.528302	0.0340943	1	0.427523	0.567568	0.0204146	1	0.229362	0.384615	0.0337597	1	0.422386	0.311111	0.0386505	1	0.498777	0.291667	0.0175475	2.44033e-07	0.191274	0.111111	0.0277199	0.0490388	0.33205	0.0888889	0.0369949	1	0.472608	0.173077	0.0772056	1	1.185	0.533333	0.0610089	1	0.880098	0.549296	0.064848	1	0.950344	0.703704	0.0799183	1	1.23818	0.711864	0.179123
id3	0.169913	7.91424e-05	0.579	0.566038	0.0788259	1	0.214288	0.297297	0.073457	1	0.195934	0.269231	0.0960214	1	0.275722	0.211111	0.0449723	1	0.105934	0.0833333	0.0231702	1	0.0470582	0.0246914	0.025695	1	0.0533348	0.0222222	0.0329572	1	0.072232	0.0384615	1.11022e-16	1	0	0	0.0130111	1	0.02359	0.028169	0.0148225	1	0.0275413	0.0493827	1.11022e-16	0.630677	0	0	0.103728
zgc:113984	0	0.000681304	0	0	0.0104314	1	0.0365614	0.0810811	0	0.00098067	0	0	0.00954366	5.89091e-05	0.0329284	0.0333333	0	1	0	0	0.00986246	1.33219e-05	0.0342255	0.0123457	0	0.0124113	0	0	0.0494955	1	0.240148	0.134615	0.110501	1	0.66488	0.333333	0.132176	0.406961	0.838755	0.507042	0.09542	1	0.55043	0.555556	0.0971526	1	0.563291	0.677966	0.137813
si:dkey-46g23.2	0.0460252	1	0.132069	0.169811	0.0553514	1	0.166208	0.297297	0.0370113	1	0.100891	0.115385	0.00908185	0.0263889	0.0186998	0.0222222	0	1	0	0	0.016931	0.752647	0.0391011	0.0246914	0.0703825	1	0.224852	0.0888889	0.0154447	1	0.0350391	0.0192308	0.0366735	1	0.0997597	0.0666667	0.0593461	1	0.181374	0.15493	0.0614869	1	0.189629	0.246914	0.0833385	1	0.278661	0.440678	0.197668
cited2	0.0585492	1	0.0929861	0.150943	0.0588787	1	0.093643	0.135135	0.031524	1	0.0432132	0.0769231	0.0858494	1	0.150915	0.111111	0.0739786	1	0.124885	0.0833333	0	0.269381	0	0	0	1	0	0	0	1	0	0	0	1	0	0	0.026948	1	0.0356959	0.028169	0.0069178	1	0.00709247	0.0123457	0.111647	1	0.211498	0.254237	0.200848
ppp1r3da	0.0890627	1	0.185132	0.264151	0.071203	1	0.139262	0.243243	0.0812682	1	0.164712	0.307692	0.107305	1	0.235193	0.177778	1.11022e-16	1	0	0	0.0522095	1	0.0942996	0.0493827	0.0313648	1	0.0502676	0.0222222	0.0434088	1	0.0749658	0.0384615	0.0702963	1	0.137023	0.0888889	0.0225871	1	0.0337389	0.028169	0.0093947	1	0.0118762	0.0246914	0.0318555	1	0.0512305	0.0847458	0.113578
slbp2	0.0160923	0.133297	0.303029	0.358491	0.0154383	1	0.288398	0.378378	0.0217273	1	0.434393	0.384615	0.0107217	1.4503e-16	0.187195	0.144444	0.0210885	1	0.41905	0.25	0.0173727	6.33655e-10	0.332062	0.185185	0.0310709	1	0.670466	0.288889	0.0625421	1	1.59533	0.596154	0.0971982	0.455924	2.79391	0.911111	0.119842	9.66646e-09	3.66077	0.943662	0.084587	0.00188021	2.33865	0.938272	0.0944089	0.00386004	2.69145	0.966102	0.126392
avd	0.0576662	1	1.65358	0.90566	0.0586432	1	1.68878	0.891892	0.0439236	1	1.17795	0.788462	0.0424596	1	1.12955	0.644444	0.0271224	1	0.652085	0.416667	0.052027	1	1.4539	0.567901	0.0738932	1	2.26025	0.666667	0.0756588	1	2.32897	0.692308	0.053041	1	1.48936	0.555556	0.0479223	1	1.31245	0.633803	0.0569678	1	1.62852	0.82716	0.0533959	1	1.50181	0.915254	0.122366
patl2	0.0237638	1	0.217006	0.301887	0.0482659	1	0.51726	0.540541	0.0301344	1	0.289573	0.346154	0.0118915	5.22555e-11	0.0948431	0.0777778	0.0159329	1	0.134256	0.0833333	0.00512212	1.2672e-14	0.0354227	0.0246914	0	2.21476e-08	0	0	0.0158046	0.000908046	0.132967	0.0769231	0.0980127	1	1.26612	0.555556	0.13735	8.63409e-09	1.95974	0.816901	0.101236	3.4724e-06	1.31989	0.876543	0.102362	1	1.33881	0.79661	0.12297
tmsb5	0.0342332	1	1.97536	0.886792	0.0316991	1	1.79786	0.891892	0.0265983	1	1.45186	0.846154	0.00921771	3.54971e-18	0.410029	0.311111	0.00913226	0.0175702	0.40557	0.208333	0.00772559	5.543e-22	0.333407	0.185185	0.00977636	1.46362e-08	0.439384	0.2	0.030863	1	1.74009	0.576923	0.0658841	1	4.45739	0.911111	0.0807683	0.01168	5.76971	0.971831	0.11223	3.01379e-15	8.79896	1	0.128704	4.42389e-12	10.5091	0.983051	0.165772
lpcat4	0.073575	1	0.194728	0.188679	0.0592934	1	0.14833	0.243243	0.0413012	1	0.0945587	0.134615	0.0516215	1	0.124722	0.1	0.101439	1	0.293452	0.166667	0.0425555	1	0.0981214	0.0493827	0.0344557	1	0.0756533	0.0444444	0	0.781405	0	0	0.0592975	1	0.148343	0.0888889	0.0699612	1	0.1827	0.183099	0.0467865	1	0.110354	0.17284	0.0707905	1	0.185444	0.322034	0.11583
sinup	0.05008	1	0.299936	0.358491	0.0326145	1	0.176646	0.243243	0.020677	1	0.101612	0.134615	0.00757414	3.2063e-07	0.030914	0.0333333	0.0122839	1	0.0545843	0.0416667	0.0199693	0.000201604	0.0974437	0.037037	0.0117895	0.196066	0.0519949	0.0222222	0.109231	1	0.806232	0.365385	0.171792	1.77815e-06	1.4551	0.711111	0.0657943	1	0.422241	0.295775	0.0460971	1	0.270569	0.358025	0.0702135	1	0.458365	0.59322	0.107348
retsatl	0.0055936	0.0560409	0.0287413	0.0566038	0.00826202	1	0.045275	0.0540541	0.00444583	0.0124213	0.0220374	0.0384615	0.00589438	1.81056e-08	0.0305421	0.0222222	0	1	0	0	0.00480515	3.8328e-08	0.0241063	0.0123457	0	0.000771387	0	0	0.0130886	0.800544	0.0778521	0.0576923	0.0921663	1	0.857314	0.377778	0.138977	0.0397754	1.45814	0.605634	0.141051	1.69543e-12	1.4866	0.814815	0.109462	0.522207	1.06954	0.711864	0.145047
mid1ip1l	0.0281961	1	0.253868	0.283019	0.0521262	1	0.541213	0.594595	0.0703403	1	0.788605	0.75	0.07609	1	0.871158	0.577778	0.0945968	1	1.15009	0.541667	0.0650412	1	0.714356	0.320988	0.043773	1	0.435592	0.155556	0.0204145	0.000367088	0.171761	0.0961538	0.0269105	1	0.239865	0.155556	0.040246	1	0.392622	0.309859	0.0591041	1	0.633344	0.641975	0.0832461	1	0.976685	0.813559	0.118792
mos	0.0856072	1	0.960315	0.754717	0.0952208	1	1.10043	0.810811	0.0950007	1	1.09716	0.711538	0.0698588	1	0.741742	0.488889	0.0604736	1	0.618435	0.416667	0.00938193	2.39178e-14	0.0646951	0.037037	0.0172315	0.000100315	0.132979	0.0444444	0.00632348	6.91489e-09	0.040797	0.0192308	0.0186359	0.038983	0.146063	0.111111	0.0286151	0.589989	0.24523	0.225352	0.0706633	1	0.752562	0.666667	0.0890968	1	1.01061	0.847458	0.117743
h2ax	0.0673448	1	0.777122	0.584906	0.0974139	1	1.24337	0.756757	0.0925193	1	1.16381	0.711538	0.0409659	1	0.417822	0.255556	0.0809945	1	0.98196	0.5	0.0454926	1	0.475698	0.197531	0.103169	1	1.33861	0.444444	0.012678	0.000190564	0.101269	0.0576923	0.00933522	0.000403621	0.0705781	0.0444444	0.0308746	1	0.295234	0.239437	0.052885	1	0.573736	0.54321	0.056946	1	0.629356	0.661017	0.0893127
tmem44	0.0791414	1	0.770335	0.679245	0.0634486	1	0.582425	0.540541	0.0421282	1	0.349447	0.365385	0.0234869	0.0416793	0.171094	0.177778	0.0318008	1	0.247301	0.166667	0.0531912	1	0.466895	0.234568	0.057091	1	0.5101	0.244444	0.0885324	1	0.88874	0.326923	0.0907493	1	0.917306	0.511111	0.0393365	1	0.321081	0.253521	0.0272375	1	0.20475	0.283951	0.0504471	1	0.437041	0.59322	0.136771
zgc:55413	0.0843469	1	0.82013	0.660377	0.101151	1	1.03504	0.783784	0.0958563	1	0.965951	0.75	0.0552937	1	0.481095	0.377778	0.0307477	1	0.232983	0.166667	0.0261467	3.06709e-05	0.191265	0.111111	0.0270201	0.189537	0.199051	0.0888889	0.0391376	0.163137	0.313234	0.0961538	0.0472012	1	0.39496	0.288889	0.0668555	1	0.61071	0.450704	0.0568052	1	0.497614	0.45679	0.0584547	1	0.515791	0.576271	0.108055
birc5b	0.0103791	0.0156008	0.209489	0.283019	0.0115672	1	0.238064	0.324324	0.00888194	0.00065762	0.174435	0.230769	0.0083507	7.95536e-15	0.162271	0.122222	0.00785112	1	0.15097	0.125	0.00717072	1.5337e-15	0.135804	0.0740741	0.0195347	0.113405	0.4444	0.177778	0.0485749	1	1.35219	0.423077	0.133324	2.55638e-05	4.88916	0.911111	0.0884956	0.00609632	2.88076	0.915493	0.0923597	6.42263e-07	3.0427	0.962963	0.141243	1.63446e-12	5.27135	0.966102	0.146251
haus6	0.0431419	1	0.495071	0.509434	0.0349962	1	0.382534	0.513514	0.0758215	1	1.00356	0.826923	0.0625934	1	0.787652	0.5	0.0679746	1	0.873935	0.458333	0.0522942	1	0.628794	0.320988	0.0589894	1	0.731101	0.311111	0.0623018	1	0.783038	0.384615	0.0452424	1	0.525106	0.311111	0.0651171	1	0.827847	0.605634	0.067898	1	0.872692	0.765432	0.0850772	1	1.16199	0.830508	0.0947546
zgc:153499	0.0188822	1	0.159097	0.207547	0.0236601	1	0.208764	0.216216	0.013993	0.046317	0.111243	0.153846	0.0319916	1	0.301276	0.255556	0.0481626	1	0.498922	0.291667	0.0361859	1	0.350389	0.209877	0.0370778	1	0.361037	0.177778	0.0738376	1	0.853082	0.288462	0.111095	1	1.43899	0.644444	0.097122	1	1.21022	0.71831	0.0780466	1	0.915273	0.654321	0.089035	1	1.08263	0.728814	0.125046
tnfsf10l4	0.0807395	1	0.157651	0.188679	0.113523	1	0.244121	0.351351	0.129953	1	0.290913	0.365385	0.0384354	1	0.0622563	0.0666667	0.0732016	1	0.1392	0.0833333	2.22045e-16	0.0462655	0	0	0.0447627	1	0.0751568	0.0444444	0.0537634	1	0.0944052	0.0576923	0.0295492	1	0.0451088	0.0444444	0.0448402	1	0.0753181	0.0704225	0.057623	1	0.102962	0.160494	0.0488324	1	0.0837344	0.152542	0.0743729
si:ch73-90k17.1	0.0441978	1	0.0761179	0.0943396	0.0154469	1	0.0212388	0.0540541	0.00781248	1	0.00950053	0.0192308	0.0212662	1	0.0311535	0.0333333	1.11022e-16	1	0	0	0.021748	1	0.032006	0.0246914	1.11022e-16	1	0	0	0.0674559	1	0.12915	0.0769231	0.116095	1	0.258553	0.177778	0.095234	1	0.200301	0.169014	0.0766334	1	0.151786	0.222222	0.0993836	1	0.211578	0.322034	0.174985
pros1	0.145048	1	0.445437	0.45283	0.085504	1	0.225015	0.297297	0.0964018	1	0.262359	0.384615	0.0501408	1	0.114808	0.0777778	0.0253834	1	0.0497515	0.0416667	0.0354681	1	0.0748247	0.037037	1.11022e-16	1	0	0	1.11022e-16	0.543629	0	0	0.0500999	1	0.114692	0.0888889	0.057929	1	0.137509	0.126761	0.0451786	1	0.100861	0.160494	0.0451157	1	0.100687	0.186441	0.135565
clcnk	0.0433338	1	0.131258	0.188679	0.0342957	1	0.0983943	0.162162	0.0497031	1	0.155621	0.269231	0.0380786	1	0.111894	0.0777778	0.044032	1	0.133882	0.0416667	0.0331757	1	0.0944715	0.0617284	0.100781	1	0.380648	0.111111	0.124932	1	0.502485	0.211538	0.106422	1	0.408305	0.133333	0.0270399	1	0.0736149	0.0704225	0.03783	1	0.110995	0.160494	0.0504575	1	0.158569	0.135593	0.11365
zgc:77118	0.075907	1	1.47753	0.867925	0.0587809	1	1.07009	0.810811	0.0656214	1	1.22898	0.730769	0.0443692	1	0.753572	0.422222	0.042926	1	0.723339	0.416667	0.0261033	3.76806e-08	0.393254	0.17284	0.0243116	0.0049674	0.360783	0.155556	0.0186694	9.31014e-06	0.262469	0.134615	0.0314248	1	0.492938	0.333333	0.0520672	1	0.919437	0.56338	0.0655818	1	1.22804	0.802469	0.0900889	1	1.83796	0.898305	0.192722
acap3b	0.0680858	1	0.0890605	0.113208	0.0432029	1	0.0504355	0.108108	0.0427576	1	0.049793	0.0576923	0.0156445	1	0.0146963	0.0222222	0.0405751	1	0.0466709	0.0416667	0.118789	1	0.181531	0.0864198	0.0659814	1	0.0856008	0.0444444	0.0663959	1	0.0862797	0.0576923	0.0841641	1	0.116556	0.0888889	0.0304426	1	0.0328013	0.028169	0.0700238	1	0.092276	0.148148	0.0636363	1	0.0817853	0.152542	0.107165
tmem266	0.0986768	1	0.248419	0.339623	0.103105	1	0.262851	0.351351	0.0634453	1	0.141656	0.192308	0.0324182	1	0.0615833	0.0777778	0	1	0	0	0.0273818	1	0.0501233	0.0246914	0	1	0	0	0.027919	1	0.0513217	0.0192308	0.113114	1	0.296229	0.2	0.0864485	1	0.209691	0.183099	0.0616325	1	0.136584	0.246914	0.0652	1	0.146609	0.271186	0.115794
prss16	0.0913453	1	0.195785	0.245283	0.0822005	1	0.171108	0.27027	0.0798782	1	0.164977	0.25	0.0631098	1	0.122444	0.0888889	0.0302856	1	0.0493123	0.0416667	0.00814848	0.50151	0.0102906	0.0123457	0.112943	1	0.257265	0.0888889	0.0533375	1	0.0991596	0.0576923	0.0332993	1	0.0553761	0.0444444	0.0650507	1	0.127206	0.112676	0.0588868	1	0.112239	0.160494	0.0393891	1	0.0680702	0.135593	0.104838
bmb	0.0560665	1	0.396456	0.377358	0.0367507	1	0.234771	0.27027	0.062574	1	0.455033	0.442308	0.0449765	1	0.301267	0.166667	0.0629991	1	0.458925	0.291667	0.02886	0.000602502	0.174658	0.0864198	0.0162822	0.0361548	0.0875954	0.0444444	0.0206548	0.0262732	0.116497	0.0576923	0.00665147	0.000690036	0.0304995	0.0222222	0.0668648	1	0.49469	0.323944	0.111939	0.00188302	0.955278	0.753086	0.127902	1.55733e-05	1.13551	0.864407	0.152985
nanos3	0.19071	8.84291e-11	1.89524	0.811321	0.0753941	1	0.56932	0.513514	0.0312161	1	0.190027	0.230769	0.00734826	2.07252e-09	0.0338675	0.0333333	0.026371	1	0.154742	0.125	0.00458725	4.88957e-10	0.0196012	0.0123457	0.00631165	0.00772191	0.0283688	0.0222222	0	2.53049e-06	0	0	0.00543248	0.00623924	0.0238354	0.0222222	0.0365548	1	0.23059	0.197183	0.112726	0.000103673	0.95305	0.740741	0.117014	0.00508393	1.00022	0.762712	0.128647
pabpn1l	0.0356972	1	2.59489	0.867925	0.0326539	1	2.32635	0.972973	0.0413885	1	3.11356	0.980769	0.0152307	2.80552e-14	0.926605	0.555556	0.0205616	1	1.32723	0.541667	0.0222271	1.16553e-07	1.45782	0.555556	0.0226452	0.00329449	1.49098	0.488889	0.0325927	1	2.32101	0.634615	0.0598641	1	4.93031	0.977778	0.0687027	1	5.86406	0.957746	0.0968638	1.55061e-07	9.08241	0.987654	0.13611	8.21311e-13	14.1047	1	0.195766
ccnb2	0.0222379	0.988652	0.225465	0.301887	0.02218	1	0.224757	0.324324	0.0746687	1	1.00716	0.673077	0.0611865	1	0.783277	0.388889	0.0506159	1	0.617785	0.375	0.0335868	8.03899e-05	0.3722	0.197531	0.052177	1	0.641635	0.244444	0.0278385	0.00338012	0.295977	0.153846	0.0966085	1	1.39911	0.666667	0.0832654	1	1.15684	0.661972	0.0997386	0.00184375	1.45761	0.888889	0.0954812	1	1.37819	0.864407	0.108152
ccdc106b	0.0904179	0.0334276	4.22946	0.981132	0.0912776	0.757936	4.281	1	0.0820251	1	3.73479	1	0.0313266	0.0345278	1.12475	0.477778	0.00372007	5.74778e-05	0.0907492	0.0833333	0.0103955	3.06506e-20	0.299783	0.160494	0.011684	2.06796e-09	0.344105	0.133333	0.00930816	4.61915e-12	0.26325	0.134615	0.0286587	1	1.00902	0.444444	0.0547568	1	2.24268	0.873239	0.0778012	0.0150289	3.49183	0.987654	0.103367	1.02811e-05	5.02234	1	0.186903
zgc:101765	0.0577755	1	0.164327	0.207547	0.0653247	1	0.191756	0.27027	0.0780921	1	0.240368	0.365385	0.0866377	1	0.27437	0.211111	0.0667456	1	0.197031	0.166667	0.0260537	0.353269	0.0615684	0.0493827	0	0.0491423	0	0	0.0289113	1	0.0698726	0.0384615	0.0308217	1	0.0755437	0.0666667	0.0661499	1	0.194815	0.197183	0.0981311	1	0.321835	0.382716	0.0960516	1	0.313105	0.423729	0.124767
folr	0.0835071	1	0.226823	0.320755	0.0762336	1	0.201993	0.189189	0.069455	1	0.179517	0.230769	0.086744	1	0.238102	0.2	0.103734	1	0.2995	0.166667	0.0550159	1	0.133919	0.0740741	0.0870601	1	0.239211	0.0888889	1.11022e-16	1	0	0	1.11022e-16	1	0	0	0.025193	1	0.0512168	0.0422535	0.0162589	1	0.0302458	0.0493827	0.0479223	1	0.112741	0.20339	0.152972
anxa13l	0.0183252	1	0.0896015	0.113208	0.0195575	1	0.0968793	0.189189	0.0260407	1	0.136879	0.211538	0.00883815	1.64714e-06	0.0377542	0.0444444	0	1	0	0	0.00620259	5.72728e-08	0.0249697	0.0123457	0.0237932	1	0.122702	0.0444444	0.0475429	1	0.286609	0.115385	0.110474	1	0.83399	0.466667	0.10438	1	0.775117	0.422535	0.0972495	1	0.70769	0.506173	0.133461	0.00123584	1.06577	0.745763	0.174179
rpain	0.0521074	1	0.487986	0.566038	0.0519889	1	0.486601	0.486486	0.06231	1	0.61051	0.673077	0.0619812	1	0.606461	0.388889	0.0328749	1	0.2762	0.208333	0.0525269	1	0.492894	0.271605	0.0922204	1	1.00417	0.355556	0.0804172	1	0.84307	0.326923	0.0848652	1	0.902938	0.533333	0.0612873	1	0.597938	0.464789	0.0597196	1	0.57879	0.592593	0.0643118	1	0.6353	0.644068	0.101253
tjp2b	0.132296	0.271341	0.636371	0.603774	0.0659212	1	0.2606	0.351351	0.0462537	1	0.167288	0.25	0.0283225	1	0.0915539	0.1	0.0551457	1	0.208269	0.166667	0.0463514	1	0.167727	0.0740741	0.0584677	1	0.224101	0.0888889	0.0450901	1	0.162083	0.0961538	0.0359555	1	0.122574	0.0888889	0.0562177	1	0.213348	0.183099	0.0677451	1	0.269731	0.333333	0.0898801	1	0.386352	0.508475	0.116005
mcl1a	0.103106	0.406096	1.93233	0.924528	0.0727589	1	1.238	0.837838	0.0913967	1	1.65523	0.865385	0.0905003	1	1.63448	0.655556	0.0685108	1	1.14728	0.583333	0.0830275	1	1.46412	0.506173	0.0399435	0.0679176	0.585073	0.2	0.0190222	3.40891e-08	0.237324	0.115385	0.0280626	0.0187576	0.379646	0.222222	0.036429	1	0.522341	0.394366	0.0469438	1	0.714542	0.641975	0.0648159	1	1.06978	0.830508	0.101721
zgc:66024.1	0.102206	0.045493	1.72781	0.924528	0.109117	1	1.87986	0.891892	0.104494	0.0553012	1.77777	0.923077	0.0489127	1	0.680029	0.411111	0.0352775	1	0.454082	0.208333	0.0201931	5.06074e-11	0.230581	0.135802	0.0458158	1	0.626946	0.222222	0.0226038	5.6749e-05	0.264141	0.134615	0.0464412	1	0.637586	0.444444	0.0470303	1	0.647645	0.422535	0.0525143	1	0.74299	0.641975	0.0763097	1	1.18927	0.864407	0.12736
zgc:56231	0.0142209	0.144558	0.133631	0.207547	0.0211811	1	0.215249	0.243243	0.021127	1	0.214588	0.269231	0.0146714	1.19749e-09	0.138682	0.111111	1.11022e-16	0.0104797	0	0	0.0108626	2.16415e-12	0.0971329	0.0493827	0.033419	1	0.374511	0.155556	0.0746436	1	1.01922	0.346154	0.173281	3.7681e-07	3.0285	0.844444	0.114797	0.00236795	1.76913	0.788732	0.0754893	1	1.03389	0.728395	0.0964686	0.0143861	1.41382	0.915254	0.138947
poll	0.057723	1	0.0832425	0.132075	0.0706604	1	0.107383	0.162162	0.0685183	1	0.103285	0.173077	0.0794562	1	0.124615	0.133333	0.101963	1	0.171458	0.125	0.0679909	1	0.102282	0.0617284	0.0663411	1	0.0991595	0.0444444	0.0904047	1	0.146926	0.0769231	0.02134	1	0.0245296	0.0222222	0.0536952	1	0.0760385	0.084507	0.0533091	1	0.0753561	0.123457	0.0667596	1	0.0999493	0.20339	0.0761598
zgc:113293	0.0507068	1	0.132578	0.207547	0.0797596	1	0.234502	0.405405	0.0383988	1	0.0939445	0.153846	0.0265568	0.0134806	0.0598468	0.0444444	0	1	0	0	0	8.69977e-08	0	0	0.0229946	1	0.0502676	0.0222222	0	0.00241717	0	0	0.0726022	1	0.208119	0.177778	0.123295	1	0.41046	0.323944	0.102689	1	0.324036	0.45679	0.140142	0.0278851	0.484939	0.627119	0.145301
plscr3b	0.0971023	1	0.368736	0.415094	0.0608796	1	0.203795	0.324324	0.0917604	1	0.342929	0.307692	0.071006	1	0.247428	0.155556	0.0500793	1	0.159622	0.125	0.0302525	0.462592	0.0857588	0.0493827	0.0130872	1	0.0313137	0.0222222	0.019797	0.935302	0.0513217	0.0192308	0.0138986	1	0.0336315	0.0222222	0.0775078	1	0.276499	0.211268	0.0604296	1	0.201904	0.283951	0.0765708	1	0.27226	0.40678	0.174729
chmp4c	0.0763528	1	0.367993	0.45283	0.0711664	1	0.336602	0.513514	0.0754439	1	0.362442	0.442308	0.0585879	1	0.263452	0.222222	0.0308285	1	0.119043	0.125	0.0670035	1	0.311915	0.148148	0.0342225	1	0.135271	0.0666667	0.0378538	1	0.153114	0.0769231	0.0731729	1	0.348664	0.244444	0.0440757	1	0.184769	0.140845	0.0369787	1	0.14877	0.209877	0.0826613	1	0.407094	0.474576	0.170598
sh2d5	0.070089	1	0.358541	0.396226	0.0837583	1	0.449568	0.432432	0.0677301	1	0.343362	0.442308	0.036096	1	0.156827	0.144444	0.0160608	1	0.0588507	0.0416667	0.0221275	0.000103306	0.0864422	0.0493827	0.0339904	1	0.145675	0.0666667	0.0380814	1	0.167503	0.0961538	0.0708609	1	0.363543	0.222222	0.0979721	1	0.549439	0.394366	0.0689683	1	0.351309	0.444444	0.110982	1	0.645179	0.661017	0.140654
irf5	0.171446	9.19892e-07	0.736905	0.679245	0.108775	1	0.407178	0.513514	0.0942107	1	0.33843	0.442308	0.0726525	1	0.243026	0.2	0.0607942	1	0.194101	0.166667	0.0488393	1	0.147617	0.0864198	0.0686101	1	0.226048	0.111111	0.0279146	1	0.0741859	0.0384615	0.038564	1	0.110186	0.0666667	0.00414459	0.00357223	0.00780112	0.0140845	0.0136099	0.66793	0.031298	0.0617284	0.0395527	1	0.113679	0.20339	0.0915311
snai3	0.0819232	1	0.0723967	0.113208	0.0176236	1	0.0108928	0.027027	0.0526132	1	0.0414227	0.0961538	0	1	0	0	0.0655569	1	0.0545843	0.0416667	0	1	0	0	0.0636323	1	0.0525732	0.0222222	0.104237	1	0.0985673	0.0576923	0.100542	1	0.0940937	0.0666667	0	1	0	0	0.0763845	1	0.0662303	0.0864198	0.102765	1	0.0967783	0.169492	0.159108
inka1b	0.0715495	1	0.553076	0.622642	0.0770327	1	0.60736	0.567568	0.0910151	1	0.7513	0.711538	0.0338059	0.117158	0.217472	0.188889	0.0461178	1	0.31896	0.25	0.0303957	0.000378887	0.190953	0.111111	0.0801432	1	0.638707	0.244444	0.0820548	1	0.658167	0.307692	0.100592	1	0.854214	0.466667	0.0548578	1	0.395948	0.295775	0.0612065	1	0.454215	0.530864	0.0580548	1	0.425051	0.542373	0.1005
ubn1	0.0665651	1	0.391735	0.377358	0.0490469	1	0.267183	0.432432	0.0211209	1	0.0953022	0.134615	0.0359376	1	0.181896	0.122222	0.0692006	1	0.41142	0.25	0.0279981	0.0188497	0.134054	0.0740741	0.0236938	1	0.109484	0.0666667	0.0616315	1	0.355528	0.173077	0.0706465	1	0.422319	0.266667	0.0735625	1	0.444512	0.338028	0.0748734	1	0.454579	0.432099	0.0834455	1	0.521764	0.59322	0.197531
fbxo32	0.142028	5.84473e-05	1.22248	0.811321	0.09615	1	0.737624	0.702703	0.0611062	1	0.414796	0.384615	0.0497655	1	0.320853	0.277778	0.0191905	1	0.100158	0.0833333	0.0271264	8.76842e-05	0.152129	0.0864198	0.013122	0.000429823	0.0636377	0.0222222	0.0645706	1	0.4446	0.192308	0.094489	1	0.721317	0.466667	0.0809462	1	0.591946	0.464789	0.0578841	1	0.387531	0.444444	0.0628263	1	0.429532	0.525424	0.0995774
tmprss4b	0.00497616	0.130012	0.0105792	0.0188679	0.0313206	1	0.0937403	0.135135	0.0716649	1	0.262286	0.365385	0.0382363	1	0.119732	0.111111	0.037855	1	0.118264	0.0833333	0.0520875	1	0.175642	0.111111	0.0177095	1	0.0470438	0.0222222	0.0262249	1	0.0755127	0.0384615	0.0604556	1	0.211655	0.155556	0.072418	1	0.26578	0.253521	0.0973069	1	0.387381	0.419753	0.0975567	1	0.388659	0.474576	0.223682
slc35a3b	0.0519732	1	0.0603946	0.0943396	0.0660251	1	0.0815375	0.135135	0.110442	1	0.157227	0.192308	0.0668066	1	0.0827569	0.1	0.152793	1	0.239854	0.166667	0.112776	1	0.161534	0.111111	0.0646041	1	0.0793317	0.0444444	0.0418583	1	0.0461603	0.0192308	0.0612539	1	0.0741902	0.0444444	0.0174031	1	0.015885	0.028169	0.0273289	1	0.0273735	0.0493827	0.0379893	1	0.0409548	0.0677966	0.0609922
cax1	0.0310261	1	0.138431	0.207547	0.0395355	1	0.186386	0.324324	0.0552052	1	0.282155	0.365385	0.0343284	1	0.156671	0.155556	0.0203578	1	0.0830715	0.0833333	0.0450452	1	0.219017	0.111111	0.0459624	1	0.224563	0.111111	0.0532288	1	0.269586	0.115385	0.056463	1	0.290224	0.177778	0.0890866	1	0.516814	0.366197	0.0853798	1	0.489501	0.506173	0.111116	0.609904	0.686587	0.762712	0.191956
slc25a20	0.104987	1	0.805305	0.584906	0.107852	1	0.833757	0.702703	0.0979414	1	0.736449	0.769231	0.0883267	1	0.645119	0.477778	0.0877878	1	0.640092	0.416667	0.0695167	1	0.475811	0.234568	0.0274836	0.252791	0.150706	0.0666667	0.00778849	3.83397e-06	0.0335751	0.0192308	0.0232366	0.70483	0.122961	0.0888889	0.0515575	1	0.326939	0.253521	0.0442123	1	0.270081	0.345679	0.056623	1	0.367565	0.491525	0.116641
llgl1	0.107155	1	0.220226	0.245283	0.0973526	1	0.194645	0.243243	0.0931605	1	0.183958	0.326923	0.066495	1	0.119819	0.133333	0.111261	1	0.23118	0.166667	0.0423486	1	0.0682032	0.0246914	0	1	0	0	0	1	0	0	0	1	0	0	0.0374402	1	0.0585874	0.0422535	0.0418744	1	0.06726	0.0987654	0.108197	1	0.222992	0.186441	0.143639
fahd1	0.121523	1	0.760134	0.641509	0.110774	1	0.674238	0.72973	0.0794026	1	0.439991	0.557692	0.0685389	1	0.365131	0.311111	0.0757899	1	0.414714	0.166667	0	3.36601e-15	0	0	0.0212367	0.0447542	0.0861784	0.0444444	0.0180996	0.00130419	0.0711219	0.0384615	0.0183929	0.188372	0.0725052	0.0666667	0.0798879	1	0.443415	0.366197	0.0726668	1	0.393167	0.481481	0.101496	1	0.602329	0.711864	0.107484
pabpc1l	0.0162555	1	0.430856	0.415094	0.00948139	0.200495	0.227543	0.297297	0.00962596	0.000829369	0.231627	0.326923	0.0106161	4.4075e-13	0.259922	0.2	0.00830516	0.0599446	0.1948	0.0833333	0.0154827	4.75881e-09	0.406532	0.209877	0.0103393	3.53429e-06	0.251955	0.111111	0.0283898	1	0.843735	0.326923	0.101213	0.24487	4.13447	0.955556	0.122397	1.26849e-08	5.28537	0.957746	0.127988	4.60567e-15	5.60114	1	0.17417	8.51418e-19	8.38271	1	0.168383
ccnb1	0.0450552	1	1.42536	0.792453	0.0299945	1	0.864237	0.837838	0.0950726	1	3.65456	0.769231	0.108258	1	4.31925	0.722222	0.0802591	1	2.9434	0.833333	0.174099	0.0421696	8.02568	0.777778	0.0298536	0.000993929	0.859288	0.288889	0.021667	2.77961e-06	0.582604	0.288462	0.0189745	7.87192e-07	0.496664	0.244444	0.0395911	1	1.21476	0.619718	0.0570095	1	1.91117	0.938272	0.0760634	1	2.74923	0.966102	0.0995557
jtb	0.0549347	1	0.413455	0.415094	0.0561111	1	0.424564	0.567568	0.0519764	1	0.385832	0.461538	0.0491033	1	0.359439	0.277778	0.0548156	1	0.412334	0.291667	0.0361764	0.0047922	0.246349	0.135802	0.0299043	0.371723	0.195128	0.0888889	0.0261656	0.0622436	0.165864	0.0961538	0.06532	1	0.513861	0.377778	0.0653301	1	0.513961	0.366197	0.101844	1	0.904706	0.604938	0.126838	0.0142132	1.20168	0.813559	0.168411
ftr86	0.0576284	1	0.300248	0.377358	0.0499451	1	0.251095	0.324324	0.0677939	1	0.368328	0.442308	0.0547635	1	0.28168	0.2	0.0350576	1	0.162114	0.0833333	0.0533066	1	0.272345	0.148148	0.0410909	1	0.197119	0.0666667	0.018445	0.0105887	0.0744086	0.0384615	0.0587075	1	0.307314	0.2	0.0703734	1	0.386127	0.352113	0.0863456	1	0.500751	0.493827	0.109222	1	0.677149	0.677966	0.184299
depdc7b	0.0508343	1	0.510111	0.490566	0.0837837	1	0.957652	0.810811	0.0563286	1	0.579891	0.653846	0.0423526	1	0.406666	0.311111	0.0319782	1	0.287862	0.125	0.0653269	1	0.698559	0.246914	0.0821834	1	0.9344	0.355556	0.118825	1	1.50073	0.576923	0.0970521	1	1.15585	0.555556	0.0507899	1	0.509555	0.380282	0.0591399	1	0.616394	0.518519	0.0641451	1	0.682674	0.711864	0.109488
gapdh	0.0652052	1	2.16526	0.867925	0.0560671	1	1.7912	0.945946	0.0675746	1	2.26497	0.942308	0.0579962	1	1.86874	0.711111	0.043613	1	1.31017	0.666667	0.0508465	0.170553	1.58534	0.530864	0.0403562	0.0205547	1.1903	0.4	0.0404919	0.115838	1.19524	0.480769	0.0597196	1	1.93867	0.755556	0.057553	1	1.85086	0.732394	0.0816102	1	2.87732	0.950617	0.107413	0.0081984	4.09193	1	0.172455
pdss2	0.076698	1	0.312321	0.358491	0.0674978	1	0.265668	0.405405	0.0987217	1	0.431166	0.557692	0.0853529	1	0.357862	0.311111	0.0782282	1	0.320259	0.25	0.0142956	1.49421e-06	0.0398092	0.037037	0.0275876	1	0.0877402	0.0444444	0.00957018	0.000955364	0.0247719	0.0192308	0.045735	1	0.16323	0.133333	0.0646191	1	0.251459	0.239437	0.0846307	1	0.354003	0.469136	0.103437	1	0.457838	0.610169	0.139252
uprt	0.0848888	1	0.284136	0.320755	0.128932	1	0.48685	0.513514	0.161749	0.0433144	0.654811	0.634615	0.132106	1	0.502509	0.333333	1.11022e-16	1	0	0	0.0270921	0.00475051	0.0686218	0.0246914	1.11022e-16	0.0270374	0	0	0.0171841	0.643182	0.0396401	0.0192308	0.0230284	1	0.0563574	0.0444444	0.0653199	1	0.2038	0.197183	0.0634173	1	0.196351	0.283951	0.058807	1	0.178584	0.254237	0.0932681
slc25a44a	0.0981165	1	0.477655	0.528302	0.0513807	1	0.21066	0.27027	0.0752978	1	0.340679	0.480769	0.0494014	1	0.200597	0.166667	0.0365025	1	0.137965	0.0833333	0.0479126	1	0.193104	0.111111	0.0439237	1	0.173359	0.0888889	0.0371532	1	0.140996	0.0769231	0.0291642	1	0.104829	0.0888889	0.084284	1	0.393218	0.28169	0.101086	1	0.496318	0.518519	0.103313	1	0.510434	0.644068	0.14796
fam89a	0.0491966	1	0.04208	0.0754717	0.0533891	1	0.0465975	0.108108	0.0100715	1	0.00619358	0.0192308	0.0608431	1	0.0548866	0.0555556	0.0858958	1	0.0849432	0.0416667	1.11022e-16	1	0	0	0.0594692	1	0.0533348	0.0222222	0.0822043	1	0.0803154	0.0384615	0.115055	1	0.123678	0.0888889	0.0860226	1	0.0851033	0.084507	0.0744159	1	0.0707705	0.135802	0.106572	1	0.112027	0.135593	0.116009
tmem144b	0.00719331	3.09401e-06	0.0605891	0.113208	0.0108168	0.0452617	0.0977673	0.135135	0.0131884	0.000721158	0.123601	0.173077	0.0185236	3.32253e-09	0.185338	0.144444	0.0300182	1	0.332262	0.208333	0.0288481	0.000384003	0.316543	0.185185	0.0207242	0.0130962	0.212095	0.111111	0.0740924	1	1.02135	0.442308	0.114441	1	1.78242	0.644444	0.121154	0.314712	1.91903	0.760563	0.11896	3.40154e-09	1.87409	0.950617	0.127451	1.63943e-07	2.04956	0.983051	0.166665
ccne1	0.0839256	1	0.554617	0.54717	0.0701611	1	0.441769	0.567568	0.12163	1	0.893901	0.634615	0.134178	0.367897	1.01563	0.588889	0.0744362	1	0.47613	0.25	0.062435	1	0.381321	0.197531	0.0705863	1	0.445158	0.177778	0.033621	1	0.176873	0.115385	0.0202406	0.169637	0.0955418	0.0666667	0.064294	1	0.395667	0.323944	0.0365286	1	0.195826	0.283951	0.0627793	1	0.383968	0.457627	0.0798325
lratd1	0.150467	1	0.39758	0.433962	0.113948	1	0.276869	0.324324	0.0387431	1	0.0709609	0.0961538	0.0926041	1	0.211986	0.177778	0.0312839	1	0.0545843	0.0416667	0.0171018	0.0739388	0.02631	0.0123457	0	1	0	0	0	0.344413	0	0	0	1	0	0	0.0141113	0.491585	0.0209216	0.0140845	0.082414	1	0.18265	0.259259	0.0847158	1	0.189179	0.271186	0.203245
arl8a	0.086977	1	0.226644	0.283019	0.0932483	1	0.247761	0.297297	0.0966794	1	0.259514	0.288462	0.14522	1	0.439666	0.333333	0.0597143	1	0.140777	0.0833333	0.0709094	1	0.174816	0.123457	0.092676	1	0.245814	0.111111	0.0307612	1	0.0619439	0.0384615	0.0211252	1	0.0392744	0.0222222	0.0457151	1	0.100866	0.0985915	0.0344057	1	0.0710396	0.111111	0.0297213	1	0.0593981	0.135593	0.101435
spink2.1	0.0699638	1	2.24175	0.867925	0.0496918	1	1.45932	0.810811	0.0664346	1	2.09989	0.961538	0.0353025	0.000484952	0.956298	0.533333	0.0243952	0.680395	0.609478	0.333333	0.0193546	7.02966e-22	0.461073	0.209877	0.03108	0.000743367	0.818177	0.333333	0.0550395	1	1.65787	0.615385	0.133457	0.0126503	5.13603	0.933333	0.119546	0.00125592	4.45139	0.929577	0.091868	0.448286	3.17041	0.962963	0.0887339	1	3.03267	0.966102	0.119991
gpt2l	0.1234	1	0.637728	0.622642	0.0687932	1	0.301709	0.432432	0.0593819	1	0.250688	0.326923	0.0318568	0.455856	0.115935	0.111111	0.0214699	1	0.071816	0.0416667	0.0390974	0.168325	0.149075	0.0740741	0.0639702	1	0.275277	0.111111	0.0450068	1	0.17741	0.0961538	0.0402024	1	0.154288	0.0888889	0.0485546	1	0.194941	0.183099	0.0840427	1	0.389016	0.45679	0.107412	1	0.532896	0.508475	0.167988
acads	0.0244148	1	0.0830836	0.132075	0.0310891	1	0.111464	0.162162	0.0926644	1	0.436568	0.519231	0.0775961	1	0.34811	0.266667	0.0783595	1	0.352468	0.25	0.0537784	1	0.21933	0.123457	0.0373874	1	0.139751	0.0666667	0.0706291	1	0.308972	0.173077	0.0574113	1	0.238025	0.155556	0.0830973	1	0.379815	0.323944	0.0757101	1	0.337401	0.407407	0.101652	1	0.491667	0.576271	0.139174
blcap	0.0475099	1	1.05771	0.773585	0.0601237	1	1.41942	0.891892	0.0813439	1	2.08023	0.903846	0.090142	1	2.37162	0.844444	0.083453	1	2.1492	0.791667	0.0585479	0.589725	1.37289	0.493827	0.0293991	1.69038e-07	0.585945	0.244444	0.032798	6.87415e-07	0.669718	0.307692	0.0382816	0.0280378	0.80971	0.4	0.0796808	1	2.02625	0.830986	0.104802	0.000400438	2.87792	1	0.104656	0.0413035	2.87274	1	0.117823
dennd2db	0.10964	1	1.04689	0.603774	0.105113	1	0.991468	0.675676	0.0791052	1	0.689015	0.557692	0.00725403	2.63038e-14	0.0379843	0.0333333	0.017289	1	0.105934	0.0833333	0.0226938	3.73653e-07	0.146898	0.0740741	0.0347547	1	0.246758	0.111111	0.031874	1	0.221946	0.134615	0.0560654	1	0.446271	0.222222	0.101632	1	0.949387	0.521127	0.080831	1	0.708197	0.679012	0.107299	1	1.01813	0.779661	0.145265
sumf1	0.137452	1	0.490519	0.490566	0.0886123	1	0.278225	0.351351	0.113848	1	0.384027	0.538462	0.0388468	1	0.0988623	0.1	0.0360453	1	0.0901638	0.0833333	0.035167	1	0.0874733	0.0617284	0.0767933	1	0.231834	0.111111	0.0380508	1	0.0963728	0.0384615	0.0388152	1	0.098763	0.0666667	0.054573	1	0.150751	0.169014	0.0315668	1	0.0766349	0.111111	0.0868367	1	0.271121	0.423729	0.136333
ftr81	0.0405876	1	0.265333	0.358491	0.0646115	1	0.473776	0.540541	0.0565082	1	0.40038	0.519231	0.043331	1	0.287679	0.244444	0.0105718	1	0.0524817	0.0416667	0.0142453	1.83952e-11	0.0747024	0.0493827	0.0155953	0.000300921	0.0832064	0.0444444	0.0216185	0.0012034	0.123077	0.0769231	0.115236	1	0.991857	0.511111	0.153337	0.000266378	1.43891	0.732394	0.12333	0.00024901	1.08309	0.802469	0.11121	1	0.947273	0.745763	0.117384
rbpms2a	0.0246284	1	0.459161	0.584906	0.025257	1	0.473397	0.486486	0.030103	1	0.586028	0.557692	0.0149456	1.53919e-16	0.252074	0.233333	0.0158699	0.496723	0.270763	0.208333	0.0508508	1	1.11849	0.395062	0.0694074	1	1.65275	0.555556	0.0907934	1	2.32583	0.769231	0.120093	0.0664873	3.33479	0.933333	0.104597	1	2.78943	0.859155	0.0662286	1	1.55776	0.925926	0.0886689	1	2.25644	0.881356	0.187963
nanog	0.0188259	1.21421e-05	0.303279	0.377358	0.0207189	0.0983077	0.340287	0.432432	0.0524122	1	1.06052	0.807692	0.0563268	1	1.16044	0.622222	0.0656381	1	1.40637	0.75	0.0666508	1	1.43379	0.54321	0.101254	1	2.44262	0.622222	0.0760383	1	1.69397	0.538462	0.0671224	1	1.4466	0.622222	0.0698588	1	1.5215	0.704225	0.0741675	1	1.64127	0.925926	0.0991816	1	2.37852	0.949153	0.155332
svopl	0.0465685	1	0.164597	0.264151	0.0599063	1	0.225419	0.297297	0.0640736	1	0.245311	0.326923	0.0458283	1	0.161356	0.122222	0.0383207	1	0.129339	0.0833333	0.0599897	1	0.225814	0.135802	0.149066	1	0.725578	0.244444	0.143382	1	0.689609	0.326923	0.0906554	1	0.381115	0.244444	0.0281369	1	0.0886137	0.0985915	0.0213424	1	0.0634118	0.0864198	0.0477468	1	0.169788	0.254237	0.117491
slc38a7	0.0600524	1	0.164066	0.207547	0.0624092	1	0.172199	0.297297	0.0585488	1	0.158928	0.25	0.051161	1	0.13426	0.133333	0.0352249	1	0.0846155	0.0416667	0	3.35718e-08	0	0	0	0.0161105	0	0	0.0407464	1	0.101229	0.0576923	0.0352683	1	0.0847435	0.0666667	0.122675	1	0.408393	0.309859	0.113395	1	0.368824	0.469136	0.100684	1	0.31639	0.508475	0.198595
zgc:92313	0.0413728	1	0.370086	0.45283	0.0642006	1	0.6402	0.702703	0.0515456	1	0.486204	0.557692	0.0684347	1	0.693907	0.455556	0.0521935	1	0.493839	0.291667	0.079214	1	0.835253	0.345679	0.0342061	0.0476652	0.292837	0.155556	0.0551117	1	0.528573	0.269231	0.068808	1	0.698693	0.422222	0.0815124	1	0.866217	0.591549	0.090447	1	0.989219	0.728395	0.115381	0.511477	1.35327	0.864407	0.135059
zgc:162945	0.0740438	1	0.349382	0.45283	0.0928891	1	0.466458	0.594595	0.128757	1	0.711058	0.634615	0.099566	1	0.509922	0.355556	0.0636714	1	0.288731	0.166667	0.0879189	1	0.434761	0.234568	0.0810679	1	0.392019	0.177778	0.0991168	1	0.506967	0.269231	0.0323482	1	0.124631	0.111111	0.0476986	1	0.201178	0.169014	0.0275582	1	0.102504	0.135802	0.0464714	1	0.194768	0.372881	0.055183
mfsd4aa	0.110234	1	0.717446	0.660377	0.0474997	1	0.246971	0.405405	0.0599831	1	0.330545	0.403846	0.0447301	1	0.229225	0.177778	0.0449443	1	0.230587	0.125	0.0225019	2.06028e-05	0.0989503	0.0617284	0	1.36602e-05	0	0	0.0300836	0.79567	0.140748	0.0769231	0.0455908	1	0.234708	0.155556	0.0521663	1	0.277542	0.197183	0.095803	1	0.598873	0.555556	0.157224	4.9451e-05	1.13904	0.813559	0.179157
creg1	0.0664545	1	0.199128	0.283019	0.0782678	1	0.244968	0.351351	0.0551983	1	0.157719	0.288462	0.0963266	1	0.319356	0.255556	0.1665	1	0.650319	0.416667	0.0359939	1	0.0928345	0.0493827	0.0440572	1	0.119126	0.0666667	0.0232374	1	0.054474	0.0192308	0.0207319	1	0.0474715	0.0444444	0.0899448	1	0.2925	0.267606	0.0590247	1	0.171535	0.222222	0.0563024	1	0.161677	0.288136	0.126504
trim9	0.0335157	1	0.0985634	0.150943	0.0226907	1	0.0613359	0.0540541	0.0234911	1	0.0639594	0.0961538	0.0618436	1	0.210773	0.166667	0.106742	1	0.422338	0.291667	0.0239862	0.0233728	0.0655932	0.0493827	0.018659	1	0.0484708	0.0222222	0.00974737	0.0760219	0.0224218	0.0192308	0.0576554	1	0.193011	0.155556	0.129583	1	0.542945	0.422535	0.101597	1	0.396297	0.45679	0.115913	1	0.469801	0.576271	0.18237
ap5m1	0.082171	1	0.202792	0.283019	0.124535	1	0.346218	0.486486	0.0995969	1	0.259385	0.288462	0.0549809	1	0.12212	0.111111	0.0542919	1	0.120209	0.0833333	0.0680414	1	0.159629	0.0740741	0.0530432	1	0.116765	0.0444444	0.0293531	1	0.0562821	0.0384615	1.11022e-16	1	0	0	0.0374003	1	0.0757214	0.0704225	0.0464362	1	0.098941	0.17284	0.0956229	1	0.246169	0.271186	0.167369
irak3	0.1038	1	0.206561	0.301887	0.183372	0.152646	0.433865	0.513514	0.191829	7.06364e-05	0.460455	0.538462	0.0365864	1	0.0556509	0.0666667	0.0360149	1	0.0545843	0.0416667	1.11022e-16	0.0134199	0	0	0.0284041	1	0.0408307	0.0222222	0.0919524	1	0.176785	0.0961538	0.0445603	1	0.0709848	0.0666667	0.0379633	1	0.0582385	0.056338	0.0233443	1	0.0321846	0.0617284	0.0188743	1	0.0249167	0.0508475	0.0739985
cyp11a1	0.0510771	1	0.198692	0.264151	0.0537818	1	0.211909	0.297297	0.0617543	1	0.251995	0.230769	0.042639	1	0.15878	0.111111	0.0251173	1	0.0830715	0.0833333	0.0730104	1	0.311291	0.17284	0.0773559	1	0.334982	0.133333	0.0979501	1	0.452872	0.25	0.141265	1	0.727758	0.422222	0.0758272	1	0.326599	0.309859	0.0727566	1	0.309921	0.382716	0.0735329	1	0.314117	0.389831	0.0987867
zgc:66455	0.0573221	1	0.345148	0.320755	0.023296	1	0.114052	0.135135	0.0205697	1	0.0981566	0.173077	0.0285316	2.78678e-05	0.145847	0.1	0.0435499	1	0.245114	0.166667	0.0157819	3.49284e-09	0.0714606	0.037037	0.0093572	0.000393535	0.0384943	0.0222222	0.0525162	1	0.309346	0.173077	0.10099	1	0.708355	0.355556	0.135979	0.618384	1.04132	0.633803	0.13875	1.72954e-08	1.06909	0.851852	0.111412	1	0.803981	0.745763	0.15535
zgc:110239	0.136453	1	0.331343	0.358491	0.0817127	1	0.171091	0.243243	0.0807336	1	0.168484	0.25	0.0753853	1	0.154429	0.133333	0.0585717	1	0.112323	0.0416667	0.0221447	1	0.0339819	0.0246914	1.11022e-16	1	0	0	0.080154	1	0.166947	0.0961538	0.0854989	1	0.181262	0.133333	0.0919122	1	0.198824	0.15493	0.0413547	1	0.0728298	0.111111	0.0523373	1	0.0975706	0.169492	0.121404
CCKAR	0.0125068	1	0.0092899	0.0188679	0	1	0	0	0	1	0	0	0	0.0934985	0	0	0	1	0	0	0	0.402857	0	0	0.0503177	1	0.0502676	0.0222222	0.0355158	1	0.0326716	0.0192308	0.161849	1	0.224162	0.133333	0.127274	1	0.163749	0.140845	0.0913126	1	0.106687	0.17284	0.187173	0.00340254	0.271427	0.457627	0.155885
s100a1	0.0175533	5.79949e-07	1.09659	0.754717	0.0390495	1	2.89481	1	0.0246548	0.0383727	1.65067	0.807692	0.0292564	0.000208517	2.03209	0.822222	0.0331615	1	2.36818	0.875	0.0411467	1	3.08783	0.814815	0.0402695	1	3.00675	0.666667	0.0421776	1	3.18372	0.826923	0.0817177	1	7.29979	0.933333	0.0913691	0.254668	8.41827	1	0.122385	3.58365e-12	12.2702	1	0.157823	2.93097e-16	17.0992	1	0.178427
lmcd1	0.0861479	1	0.521809	0.54717	0.0522474	1	0.277588	0.432432	0.050729	1	0.267563	0.307692	0.028311	0.0930904	0.130476	0.133333	0.0705989	1	0.405181	0.208333	0.0350919	0.145586	0.169629	0.0987654	0.0521363	1	0.276851	0.133333	0.0384239	1	0.189644	0.0961538	0.0712436	1	0.409868	0.266667	0.0663077	1	0.374324	0.28169	0.0636351	1	0.355412	0.395062	0.117618	1	0.778831	0.661017	0.195184
stap2b	0.0779966	1	0.244033	0.301887	0.0855045	1	0.274336	0.351351	0.10565	1	0.359865	0.5	0.0494961	1	0.137734	0.144444	0.0392884	1	0.10346	0.0833333	0.0147117	6.68712e-05	0.0315061	0.0123457	0.0262777	1	0.063258	0.0222222	0.0840508	1	0.268399	0.134615	0.09667	1	0.321006	0.222222	0.0788307	1	0.247355	0.253521	0.0721225	1	0.220959	0.296296	0.0982836	1	0.327904	0.355932	0.116808
ugt2a4	0.0934585	1	0.207511	0.264151	0.0510214	1	0.0965639	0.216216	0.0729179	1	0.15125	0.211538	0.0402097	1	0.071869	0.0666667	0.101901	1	0.231889	0.125	0.0395709	1	0.070463	0.037037	0.0391616	1	0.0695654	0.0444444	0.0193614	1	0.0295345	0.0192308	0.0634434	1	0.12687	0.111111	0.11686	1	0.276746	0.253521	0.0852875	1	0.184597	0.259259	0.0860202	1	0.186624	0.186441	0.134513
abhd6b	0.176422	1	0.321945	0.339623	0.151445	1	0.263459	0.432432	0.0984847	1	0.150736	0.269231	0.0676229	1	0.0933829	0.0777778	0.0440144	1	0.0545843	0.0416667	0.0904033	1	0.135063	0.0740741	2.22045e-16	1	0	0	2.22045e-16	1	0	0	0.0440452	1	0.0546316	0.0444444	0.0542849	1	0.0708609	0.0704225	0.0305036	1	0.0347756	0.0617284	0.0285739	1	0.0321126	0.0677966	0.109495
tmem70	0.112271	1	0.935158	0.716981	0.0980684	1	0.785577	0.837838	0.105249	1	0.860351	0.75	0.117697	1	0.994061	0.555556	0.0602628	1	0.423242	0.291667	0.0291969	8.3116e-08	0.172751	0.0987654	1.11022e-16	1.46597e-09	0	0	0.0203683	1.23606e-05	0.111714	0.0576923	0.0149811	2.98841e-05	0.0773468	0.0444444	0.0632912	1	0.450154	0.338028	0.0754034	1	0.56165	0.604938	0.0897052	1	0.700749	0.728814	0.13454
C9H2orf49	0.0682911	1	0.251574	0.283019	0.0458748	1	0.152885	0.243243	0.0693991	1	0.256742	0.365385	0.0918073	1	0.366529	0.333333	0.0610506	1	0.218446	0.166667	0.0187229	0.000524406	0.0512667	0.0493827	0.0588436	1	0.208577	0.0888889	0.0617042	1	0.22139	0.115385	0.0590105	1	0.20932	0.155556	0.0899191	1	0.356908	0.239437	0.105799	1	0.439811	0.506173	0.106851	1	0.445458	0.525424	0.118025
nfkbiab	0.0844269	1	0.818535	0.660377	0.121685	1	1.31006	0.891892	0.145887	7.29431e-05	1.65925	0.846154	0.135054	0.00108544	1.50026	0.688889	0.105589	1	1.09043	0.541667	0.0437237	0.487266	0.35806	0.17284	0.0231587	0.107563	0.164606	0.0888889	0.0171012	0.000185954	0.114329	0.0576923	0.0240521	0.0151	0.172315	0.0666667	0.0129117	3.68217e-07	0.081818	0.084507	0.027577	1	0.203406	0.308642	0.0549007	1	0.475319	0.576271	0.115349
b4galnt2.2	0.0321283	1	0.167577	0.245283	0.0403584	1	0.221771	0.27027	1.11022e-16	8.13724e-07	0	0	0.0108571	4.68115e-09	0.0455824	0.0444444	1.11022e-16	0.887707	0	0	1.11022e-16	2.54818e-13	0	0	1.11022e-16	2.74001e-05	0	0	0.0255858	0.12171	0.126996	0.0576923	0.116568	1	0.847338	0.4	0.134211	0.346281	1.01758	0.661972	0.137544	3.96374e-06	1.05066	0.765432	0.161683	8.20978e-07	1.29828	0.813559	0.180258
timm10b	0.103571	1	0.563699	0.54717	0.110072	1	0.609745	0.567568	0.0971786	1	0.51936	0.596154	0.0941428	1	0.498635	0.366667	0.0562638	1	0.259753	0.166667	0.0165075	1.73392e-07	0.058085	0.0493827	0.0141821	0.00212111	0.0484708	0.0222222	0.0329946	0.528681	0.134168	0.0769231	0.0349225	1	0.14384	0.0888889	0.0697204	1	0.340194	0.295775	0.0951683	1	0.505611	0.567901	0.100753	1	0.544041	0.59322	0.114556
mkrn4	0.0602833	1	0.787524	0.660377	0.0711671	1	0.97081	0.72973	0.112898	0.00438758	1.75186	0.961538	0.102464	1	1.54584	0.688889	0.120133	1	1.8986	0.708333	0.0843807	1	1.20533	0.45679	0.053215	1	0.673644	0.311111	0.0484467	1	0.599262	0.269231	0.0584133	1	0.756987	0.4	0.0429682	1	0.516365	0.366197	0.057846	1	0.74778	0.654321	0.0632413	1	0.836411	0.644068	0.086771
xkrx	0.0447217	1	0.0819401	0.132075	0.0643669	1	0.129149	0.243243	0.113086	1	0.265132	0.288462	0.0805468	1	0.171553	0.144444	0.0991175	1	0.223687	0.166667	0.0206485	1	0.0318977	0.0246914	0.0304564	1	0.0510863	0.0222222	0.0247208	1	0.0396401	0.0192308	0.145127	1	0.36673	0.244444	0.111152	1	0.259284	0.239437	0.0561529	1	0.108802	0.185185	0.0297437	1	0.0496315	0.0677966	0.113697
astn1	0.0193938	0.675419	0.0715078	0.0754717	0.0526451	1	0.242627	0.351351	0.0447245	1	0.198086	0.25	0.0655561	1	0.319473	0.255556	0.0718548	1	0.358731	0.208333	0.0774918	1	0.394792	0.197531	0.124425	1	0.725382	0.311111	0.0820328	1	0.424455	0.211538	0.0868478	1	0.456488	0.266667	0.0724828	1	0.362706	0.28169	0.0733154	1	0.367993	0.444444	0.0816	1	0.421604	0.542373	0.10819
tmc6b	0.0997778	1	0.311027	0.396226	0.0948738	1	0.291536	0.378378	0.117496	1	0.384076	0.423077	0.0401583	1	0.0988864	0.1	1.11022e-16	1	0	0	0.0378095	1	0.0918071	0.0617284	1.11022e-16	0.0689283	0	0	0.0246552	1	0.054474	0.0192308	0.0769862	1	0.223298	0.155556	0.0306489	1	0.0709732	0.0704225	0.066835	1	0.1867	0.271605	0.101721	1	0.318839	0.40678	0.204238
zgc:152891	0.148126	1	0.379148	0.415094	0.0760468	1	0.160513	0.27027	0.143468	1	0.363635	0.480769	0.104879	1	0.242141	0.177778	0.117585	1	0.280695	0.208333	0.0917822	1	0.204008	0.135802	0.0271987	1	0.0448035	0.0222222	2.22045e-16	0.595359	0	0	0.0159438	1	0.0235529	0.0222222	0.0319781	1	0.0545781	0.0422535	0.0294598	1	0.0493772	0.0864198	0.0548183	1	0.106271	0.169492	0.0736819
snupn	0.0602356	1	0.509022	0.528302	0.0617011	1	0.524631	0.621622	0.0815595	1	0.746771	0.769231	0.0763247	1	0.686363	0.422222	0.0757364	1	0.679655	0.375	0.0345241	1.55783e-06	0.25515	0.160494	0.034801	0.00603053	0.257663	0.111111	0.0335939	0.00041082	0.246748	0.115385	0.0537389	1	0.441214	0.311111	0.102946	1	1.00622	0.647887	0.10759	0.0517025	1.0651	0.851852	0.10432	1	1.02356	0.779661	0.128478
atpsckmt	0.0917543	1	0.45602	0.584906	0.0751324	1	0.353467	0.459459	0.0819496	1	0.394728	0.538462	0.0897153	1	0.44309	0.311111	0.0704395	1	0.325736	0.208333	0.0472446	0.402301	0.197436	0.123457	1.11022e-16	4.0439e-06	0	0	0.0213682	0.0167115	0.0748218	0.0576923	0.0776164	1	0.368369	0.222222	0.0760036	1	0.358675	0.323944	0.0953468	1	0.47903	0.506173	0.102248	1	0.52404	0.661017	0.120878
syngr2b	0.0614181	1	0.477879	0.509434	0.0656277	1	0.519472	0.567568	0.0625274	1	0.488758	0.5	0.064917	1	0.512391	0.355556	0.0546268	1	0.412591	0.291667	0.0420165	5.84085e-05	0.297717	0.135802	0.0409513	1	0.288419	0.133333	0.0340906	0.0157767	0.230165	0.115385	0.0602768	1	0.466749	0.311111	0.0983097	1	0.868816	0.605634	0.0926158	1	0.804792	0.654321	0.11554	0.027639	1.06999	0.898305	0.159915
zgc:114123	0.0204643	0.0509103	0.274136	0.320755	0.0259831	1	0.3658	0.405405	0.0256037	1	0.359332	0.423077	0.0153212	6.23383e-14	0.193848	0.166667	0.0252177	1	0.352774	0.208333	0.0253975	1.32193e-08	0.355825	0.185185	0.0339652	1	0.507124	0.244444	0.0456748	1	0.730708	0.307692	0.108991	1	2.19611	0.866667	0.119393	0.000613177	2.47097	0.901408	0.137007	4.97468e-14	2.95517	0.987654	0.150234	7.05906e-12	3.33339	1	0.165237
mpzl1l	0.0356082	1	0.0610786	0.0943396	0.132945	1	0.32296	0.324324	0.0895898	1	0.194024	0.211538	0.042901	1	0.0768484	0.0888889	0.126854	1	0.30384	0.25	0.122449	1	0.290209	0.148148	0.178975	1	0.476806	0.222222	0	1	0	0	0.0640532	1	0.12674	0.0666667	0.0252241	1	0.0401082	0.0422535	0.0418104	1	0.0744394	0.0987654	0.00606075	1	0.00740311	0.0169492	0.0338943
snx10a	0.0817483	1	0.800175	0.679245	0.0558871	1	0.495059	0.567568	0.0542987	1	0.477522	0.538462	0.0277723	4.73528e-10	0.20897	0.1	0.0219645	1	0.157285	0.0833333	0	6.52181e-21	0	0	0.0214837	0.00683439	0.153143	0.0888889	0.0453287	1	0.381378	0.173077	0.0989424	1	1.02153	0.488889	0.106695	1	1.12572	0.605634	0.102038	0.245429	1.06282	0.814815	0.136507	0.00575363	1.5496	0.830508	0.165255
si:ch211-202f5.3	0.0303749	1	0.171211	0.207547	0.0337652	1	0.194863	0.324324	0.0452376	1	0.27946	0.403846	0.0781943	1	0.555484	0.433333	0.0643467	1	0.434077	0.291667	0.0583709	1	0.38403	0.234568	0.0274207	0.00766902	0.151149	0.0666667	0.0680594	1	0.4659	0.211538	0.0969085	1	0.730656	0.422222	0.0928757	1	0.691889	0.492958	0.0904156	1	0.668508	0.654321	0.10443	1	0.804393	0.79661	0.159348
bach2a	0.101223	1	0.252513	0.320755	0.0795106	1	0.185416	0.243243	0.0829553	1	0.195705	0.307692	0.106678	1	0.270178	0.233333	0.0534224	1	0.112323	0.0416667	0.0322724	1	0.0602479	0.037037	0.0439953	1	0.0882244	0.0444444	0.0259934	1	0.046288	0.0192308	0.0716679	1	0.162525	0.111111	0.0561145	1	0.119446	0.112676	0.0515013	1	0.107305	0.160494	0.0847496	1	0.201119	0.338983	0.161683
asb3	0.0803539	1	0.389528	0.471698	0.099964	1	0.515056	0.621622	0.0769935	1	0.368936	0.461538	0.0537179	1	0.234436	0.2	0.0325303	1	0.126105	0.0833333	0.0143568	9.38518e-09	0.0470348	0.037037	0.0362843	1	0.144177	0.0888889	0.0283215	0.0484482	0.106488	0.0576923	0.0724351	1	0.341456	0.222222	0.0870498	1	0.43138	0.380282	0.107439	1	0.565182	0.641975	0.127228	1	0.703528	0.728814	0.130575
pus3	0.051404	1	0.623304	0.679245	0.0519382	1	0.631393	0.675676	0.0516009	1	0.626283	0.673077	0.0435871	0.0192525	0.507786	0.333333	0.03048	1	0.327133	0.166667	0.0231134	2.18032e-12	0.23379	0.135802	0.0178945	8.73219e-07	0.171844	0.0888889	0.0274252	6.06191e-05	0.287643	0.153846	0.0728422	1	0.965968	0.444444	0.125502	0.00273551	1.9414	0.873239	0.14044	6.10833e-12	2.24764	0.975309	0.144856	6.98352e-08	2.34042	0.949153	0.144755
patl1	0.0672145	1	0.550897	0.584906	0.0784254	1	0.669773	0.675676	0.111192	1	1.04774	0.75	0.0660551	1	0.538936	0.433333	0.0530709	1	0.409505	0.25	0.0402937	0.000118524	0.290913	0.17284	0.0435492	0.249508	0.32024	0.133333	0.0533886	1	0.412568	0.230769	0.0708219	1	0.58852	0.333333	0.0875756	1	0.770922	0.549296	0.0942731	1	0.847182	0.716049	0.0787489	1	0.673288	0.745763	0.128885
necap1	0.105469	1	0.369481	0.490566	0.135853	1	0.513018	0.648649	0.173753	0.000109279	0.708187	0.653846	0.100428	1	0.346901	0.3	0.0573034	1	0.170177	0.0833333	0.0717149	1	0.225738	0.135802	0.0411394	1	0.112683	0.0444444	0.0415565	1	0.114096	0.0384615	0.0637442	1	0.194538	0.133333	0.0208336	1	0.0491649	0.0422535	0.0100336	0.00977942	0.0206114	0.0246914	0.0237168	1	0.0574877	0.0677966	0.086473
harbi1	0.0643241	1	0.168156	0.150943	0.119345	1	0.370455	0.486486	0.0746643	1	0.203019	0.307692	0.0861805	1	0.243676	0.2	0.0396875	1	0.0921194	0.0833333	0.0555323	1	0.139824	0.0740741	0.0829806	1	0.232193	0.0888889	0.0544081	1	0.136293	0.0576923	0.0759301	1	0.207396	0.133333	0.101012	1	0.298674	0.211268	0.0627216	1	0.162899	0.259259	0.0734705	1	0.198913	0.372881	0.0892525
fbxo43	0.0322635	1	0.111042	0.150943	0.0274362	1	0.0911277	0.162162	0.0394988	1	0.142366	0.211538	0.0631773	1	0.255555	0.233333	0.0830788	1	0.361504	0.208333	0.0509863	1	0.195373	0.111111	0.0781946	1	0.334673	0.177778	0.0999568	1	0.458081	0.25	0.0520173	1	0.200313	0.133333	0.0919576	1	0.411582	0.323944	0.101189	1	0.465356	0.444444	0.0968996	1	0.440159	0.508475	0.145543
cpeb1b	0.0422733	1	0.762976	0.698113	0.0487451	1	0.91043	0.783784	0.0390334	1	0.691441	0.673077	0.0548318	1	1.05436	0.555556	0.0317396	1	0.536395	0.375	0.0452238	1.69701e-05	0.829463	0.345679	0.0406942	0.000471218	0.727913	0.244444	0.044638	1	0.816162	0.423077	0.0986209	1	2.21884	0.844444	0.118602	0.060739	2.81531	0.901408	0.103566	0.158892	2.36298	0.938272	0.113692	0.00923284	2.66533	0.983051	0.166348
rcc1	0.0784488	1	1.55725	0.90566	0.0576039	1	1.05452	0.810811	0.0713072	1	1.37968	0.846154	0.0823328	1	1.65602	0.788889	0.0701429	1	1.35124	0.666667	0.0264795	1.33e-18	0.404452	0.17284	0.0337747	3.8889e-06	0.544213	0.2	0.0264295	1.09335e-09	0.403525	0.173077	0.042697	1	0.726303	0.4	0.0936714	1	1.95288	0.830986	0.118637	3.23895e-06	2.64814	0.962963	0.119758	8.83816e-05	2.68061	1	0.137073
trmt2b	0.090777	1	0.459275	0.490566	0.0801206	1	0.391617	0.540541	0.0689347	1	0.323632	0.423077	0.0188244	1.381e-05	0.0655981	0.0777778	0.0442856	1	0.186045	0.125	0.00968659	4.09871e-10	0.0298051	0.0123457	0.0811171	1	0.397827	0.133333	0.0419267	1	0.173858	0.0961538	0.107249	1	0.569021	0.333333	0.0831235	1	0.410405	0.352113	0.118469	1	0.647139	0.592593	0.0910619	1	0.46112	0.610169	0.122675
gsto2	0.122368	1	0.40312	0.415094	0.0863845	1	0.257472	0.432432	0.119233	1	0.389773	0.403846	0.11834	1	0.385995	0.277778	0.0562835	1	0.149793	0.125	0.118849	1	0.38815	0.222222	0.0859734	1	0.255909	0.111111	0.0712975	1	0.201723	0.115385	0.0593768	1	0.160184	0.0888889	0.0182024	1	0.0376349	0.056338	0.0158424	1	0.0318775	0.0617284	0.0168177	1	0.0342347	0.0847458	0.0617572
ykt6	0.0998629	1	0.445777	0.490566	0.0761411	1	0.31524	0.378378	0.0847698	1	0.361388	0.461538	0.0836233	1	0.355166	0.255556	0.0317492	1	0.106084	0.0833333	0.052496	1	0.197412	0.111111	0.0518918	1	0.194581	0.0888889	0.0370711	1	0.128286	0.0576923	0.0453341	1	0.164481	0.111111	0.0988911	1	0.440209	0.323944	0.0852932	1	0.364238	0.407407	0.103097	1	0.464436	0.525424	0.125383
ucp2	0.0446317	1	0.230163	0.339623	0.0487542	1	0.256852	0.432432	0.0697855	1	0.402729	0.480769	0.0653225	1	0.370492	0.255556	0.0323369	1	0.154783	0.125	0.0483475	0.479646	0.254189	0.148148	0.0898459	1	0.555355	0.222222	0.0748622	1	0.440184	0.211538	0.0651758	1	0.369444	0.244444	0.103096	1	0.6626	0.507042	0.0849704	1	0.517145	0.592593	0.111399	1	0.732225	0.677966	0.136597
tob1b	0.110741	1	1.56017	0.811321	0.1263	0.801594	1.84993	0.918919	0.0670463	1	0.822044	0.673077	0.0794352	1	1.01904	0.511111	0.0506776	1	0.578704	0.291667	0.0639944	1	0.775157	0.320988	0.0194206	1.39822e-05	0.179152	0.0888889	0.0269937	7.63235e-05	0.266653	0.134615	0.0327449	0.959845	0.337469	0.222222	0.0557863	1	0.652453	0.43662	0.0686061	1	0.846266	0.740741	0.0970947	1	1.31707	0.813559	0.158038
dph1	0.145829	1	0.501418	0.415094	0.100334	1	0.308721	0.405405	0.10708	1	0.335711	0.423077	0.133627	1	0.44737	0.355556	0.113912	1	0.363632	0.25	0.0473453	1	0.119492	0.0617284	1.11022e-16	0.0815663	0	0	1.11022e-16	0.00868377	0	0	0.0479149	1	0.121282	0.0888889	0.0665172	1	0.182893	0.197183	0.0455943	1	0.11403	0.148148	0.0444168	1	0.11039	0.220339	0.0867916
pfkfb1	0.132974	1	0.661916	0.641509	0.111323	1	0.525606	0.648649	0.0871122	1	0.383544	0.442308	0.0553492	1	0.216185	0.2	0.0860474	1	0.377567	0.166667	0.0339225	0.000320121	0.117918	0.0493827	0	8.83138e-05	0	0	0.0222494	0.0415384	0.0706092	0.0384615	0.038159	1	0.13626	0.111111	0.084842	1	0.37083	0.309859	0.0835382	1	0.363576	0.469136	0.0831028	1	0.361162	0.491525	0.136431
ccl39.7	0.117181	1	0.776345	0.641509	0.149974	0.313012	1.07056	0.72973	0.111825	1	0.730744	0.653846	0.0871645	1	0.53055	0.388889	0.0869087	1	0.528562	0.291667	0.0746541	1	0.435591	0.209877	0.0256782	0.175659	0.116074	0.0444444	0.0423187	1	0.213993	0.115385	0.0125368	0.0321585	0.0491679	0.0444444	0.0293286	0.293772	0.136432	0.126761	0.0604652	1	0.333835	0.37037	0.0697417	1	0.399619	0.457627	0.0937414
galnt6	0.0376145	1	0.128616	0.226415	0.0643746	1	0.251067	0.324324	0.0521162	1	0.192653	0.307692	0.0589001	1	0.224526	0.211111	0.0605043	1	0.232229	0.166667	0.0673434	1	0.265754	0.148148	0.0500666	1	0.183254	0.0888889	0.0370347	1	0.126181	0.0769231	0.0768372	1	0.314049	0.222222	0.111753	1	0.507499	0.422535	0.10458	1	0.465862	0.493827	0.11269	1	0.513006	0.59322	0.143912
CACNA2D3	0.0252317	1	0.0260764	0.0188679	0.0319971	1	0.0348205	0.0540541	0.0156082	1	0.0146394	0.0192308	0.0255325	1	0.0264537	0.0333333	0.136489	1	0.217217	0.125	0	0.0203077	0	0	0	1	0	0	0.034218	1	0.0378026	0.0192308	0.0343416	1	0.03797	0.0222222	0.0825043	1	0.113508	0.112676	0.180524	0.00191808	0.313422	0.407407	0.158377	0.684608	0.263867	0.457627	0.161735
sybu	0.0511733	1	0.362261	0.320755	0.0022816	0.0137252	0.00912042	0.027027	0.0273384	1	0.167471	0.230769	0.0153851	4.42784e-07	0.0838479	0.0666667	0.0335289	1	0.214839	0.166667	0.0983836	1	0.828442	0.345679	0.140249	1	1.31133	0.4	0.170858	0.675192	1.69857	0.576923	0.150263	1	1.43507	0.6	0.0746437	1	0.58233	0.380282	0.044122	1	0.3013	0.37037	0.0512406	1	0.362855	0.508475	0.0720894
si:ch211-167j6.3	0.0703651	1	0.548653	0.509434	0.0400421	1	0.27133	0.297297	0.0276316	1	0.172253	0.25	0.0244512	3.74598e-06	0.148503	0.133333	0.0207387	1	0.121732	0.0833333	0.0548748	1	0.40132	0.222222	0.0594757	1	0.443915	0.177778	0.10007	1	0.859699	0.384615	0.12303	1	1.12266	0.511111	0.0882181	1	0.731406	0.478873	0.0882232	1	0.73146	0.654321	0.101453	1	0.875014	0.745763	0.16431
zgc:101562	0.101036	1	0.640167	0.584906	0.0925549	1	0.572023	0.594595	0.105587	1	0.677543	0.634615	0.0629726	1	0.350805	0.3	0.0946441	1	0.588626	0.375	0.0378584	0.01237	0.186237	0.123457	0.0569169	1	0.308984	0.133333	0.051639	1	0.273595	0.153846	0.0287885	1	0.133177	0.111111	0.0717974	1	0.413957	0.323944	0.0738523	1	0.429023	0.45679	0.102083	1	0.648722	0.677966	0.11216
carhsp1	0.117541	1	0.865449	0.716981	0.0889723	1	0.604757	0.702703	0.0893244	1	0.607819	0.653846	0.0579855	1	0.351699	0.266667	0.0309854	1	0.161993	0.125	0.0432328	0.00320697	0.243973	0.148148	0.0467663	1	0.268934	0.133333	0.0453165	1	0.258626	0.153846	0.05287	1	0.31332	0.177778	0.0867908	1	0.585872	0.422535	0.110011	1	0.794413	0.691358	0.108879	1	0.78388	0.745763	0.109181
si:ch1073-190k2.1	0.0347847	1	0.302817	0.339623	0.0836651	1	0.907135	0.702703	0.100528	1	1.14759	0.807692	0.0995502	1	1.13326	0.6	0.127179	1	1.55545	0.583333	0.110311	1	1.29352	0.481481	0.0943885	1	1.05838	0.288889	0.0599372	1	0.59485	0.307692	0.0493803	1	0.46689	0.266667	0.019241	0.000259968	0.147626	0.183099	0.0296747	0.28332	0.249337	0.283951	0.0618051	1	0.618234	0.59322	0.10933
zgc:114041	0.0690541	1	0.331183	0.396226	0.0221419	1	0.0814259	0.189189	0.0520416	1	0.232182	0.288462	0.0487167	1	0.213848	0.166667	0.0281099	1	0.108726	0.0833333	0.0730686	1	0.355731	0.160494	0.204322	1	1.34967	0.466667	0.121334	1	0.681585	0.326923	0.0821487	1	0.41281	0.288889	0.0594633	1	0.274336	0.295775	0.0526519	1	0.235585	0.333333	0.0632094	1	0.29623	0.389831	0.0858055
bokb	0.0852959	1	1.05379	0.811321	0.0573295	1	0.637622	0.702703	0.0752626	1	0.898661	0.730769	0.0650761	1	0.74771	0.477778	0.0726506	1	0.859308	0.541667	0.0759997	1	0.909844	0.419753	0.0907452	1	1.14059	0.4	0.0464356	0.110323	0.490235	0.25	0.0840477	1	1.03416	0.533333	0.088915	1	1.11124	0.633803	0.0715022	1	0.842146	0.691358	0.0794355	1	0.962427	0.779661	0.112664
tmed1a	0.0881922	1	0.784063	0.54717	0.0550995	1	0.432579	0.594595	0.0625718	1	0.507398	0.519231	0.0389492	0.0104919	0.281211	0.2	0.00996453	0.926129	0.0545843	0.0416667	0.0137775	1.40473e-14	0.0800595	0.0246914	0.0151436	0.000102398	0.0895892	0.0444444	0.0225667	0.00040567	0.144538	0.0769231	0.103808	1	0.966496	0.511111	0.0879887	1	0.781751	0.591549	0.118513	0.219872	1.14692	0.740741	0.133885	0.00117644	1.34389	0.864407	0.187935
tspan13a	0.112719	0.794663	2.09272	0.924528	0.0660133	1	1.0568	0.864865	0.0654731	1	1.04591	0.788462	0.0449719	1	0.654001	0.511111	0.0340869	1	0.464737	0.375	0.0712553	1	1.16391	0.419753	0.0584675	1	0.907187	0.333333	0.0711767	1	1.16228	0.480769	0.083117	1	1.41531	0.666667	0.0622275	1	0.981052	0.605634	0.0595673	1	0.928648	0.691358	0.10293	1	1.86125	0.898305	0.15784
lin28a	0.0893673	1	0.810529	0.603774	0.0788363	1	0.690761	0.621622	0.0761121	1	0.660579	0.557692	0.0624836	1	0.514809	0.3	0.0758299	1	0.657471	0.375	0.0151074	3.20961e-11	0.0907999	0.0493827	0.0149381	0.000262362	0.0895892	0.0444444	0.0384647	0.242241	0.28145	0.115385	0.0832942	1	0.740869	0.355556	0.0629055	1	0.519186	0.366197	0.0730508	1	0.627067	0.654321	0.11606	1	1.13458	0.779661	0.182263
sox19b	0.0632488	1	0.420426	0.509434	0.057381	1	0.372037	0.513514	0.0968971	1	0.723071	0.576923	0.0596379	1	0.39048	0.322222	0.103979	1	0.791728	0.5	0.0157082	8.96232e-14	0.0765006	0.0246914	0.0188179	0.000376303	0.0949506	0.0444444	0.0144575	3.68632e-06	0.0693022	0.0384615	0.0717891	1	0.493313	0.333333	0.0917901	1	0.674573	0.507042	0.120458	0.0153191	0.957545	0.765432	0.119786	0.374891	0.950625	0.79661	0.136145
elovl7a	0.0276334	1	0.202675	0.264151	0.0272117	1	0.198921	0.27027	0.0307906	1	0.231233	0.346154	0.0245402	1.81384e-05	0.175485	0.2	0.0385831	1	0.304943	0.166667	0.0397071	0.00887604	0.31593	0.185185	0.0813363	1	0.775805	0.266667	0.0590108	1	0.517152	0.269231	0.123967	1	1.3339	0.555556	0.108957	1	1.12862	0.647887	0.116536	0.000539529	1.23115	0.851852	0.116835	0.0363006	1.23524	0.881356	0.166266
glipr2l	0.0317493	1	0.211337	0.226415	0.0573665	1	0.439424	0.567568	0.0883906	1	0.75944	0.711538	0.0926662	1	0.806768	0.488889	0.0658489	1	0.522597	0.25	0.0696502	1	0.560971	0.259259	0.104588	1	0.942499	0.355556	0.109289	1	0.997497	0.326923	0.0497294	1	0.367604	0.244444	0.0607503	1	0.472187	0.295775	0.0522282	1	0.390771	0.45679	0.0903667	1	0.781223	0.711864	0.126914
zgc:165573	0.0910028	1	0.360541	0.433962	0.119365	1	0.511377	0.594595	0.0990725	1	0.402053	0.480769	0.0665674	1	0.242321	0.222222	0.025708	1	0.0747551	0.0416667	0.0373504	0.0217258	0.117975	0.0617284	0.0168029	0.141356	0.0448035	0.0222222	0.0557628	1	0.193974	0.0961538	0.11336	1	0.478314	0.266667	0.0786023	1	0.299084	0.267606	0.0986709	1	0.399959	0.45679	0.0935819	1	0.373681	0.508475	0.0934498
si:ch211-157j23.3.1	0.0463442	1	0.055017	0.0754717	0	1	0	0	0.00978818	1	0.00843384	0.0192308	0.0578496	1	0.0725494	0.0444444	0	1	0	0	0	0.269381	0	0	0.0340454	1	0.0376081	0.0222222	0.100944	1	0.147108	0.0769231	0.258736	1	0.504973	0.311111	0.0937193	1	0.133728	0.15493	0.0257158	1	0.026712	0.037037	0.124243	1	0.192405	0.288136	0.130877
smpd5	0.13131	1	0.415968	0.45283	0.0503499	1	0.122709	0.243243	0.100937	1	0.29594	0.403846	0.0924526	1	0.264395	0.222222	0.0978231	1	0.284256	0.166667	0.0718414	1	0.191755	0.111111	0	0.0380728	0	0	0.0454339	1	0.107996	0.0576923	0.0351343	1	0.078642	0.0666667	0.0868639	1	0.244125	0.211268	0.0807848	1	0.222553	0.296296	0.084924	1	0.237186	0.372881	0.107186
cited1	0.0956403	1	0.407989	0.490566	0.0712869	1	0.280549	0.351351	0.0904842	1	0.38002	0.365385	0.0545768	1	0.200491	0.155556	0.0901847	1	0.378411	0.25	0.0566847	1	0.210227	0.111111	0.102654	1	0.446839	0.177778	0.057294	1	0.213062	0.115385	0.0204605	1	0.0602428	0.0444444	0.0450356	1	0.157829	0.183099	0.0392382	1	0.133105	0.160494	0.0758672	1	0.303588	0.288136	0.182146
arsh	0.206384	0.0299791	0.521614	0.471698	0.13379	1	0.295159	0.405405	0.084361	1	0.162861	0.25	0.0617973	1	0.10981	0.1	0	1	0	0	0.0875789	1	0.170834	0.0987654	0	1	0	0	0.0253596	1	0.0365913	0.0192308	0	1	0	0	0.0796125	1	0.151275	0.126761	0.0660815	1	0.119481	0.160494	0.0447642	1	0.0734218	0.118644	0.131432
spsb1	0.0392106	1	0.168881	0.226415	0.0702447	1	0.349689	0.459459	0.0650894	1	0.317606	0.384615	0.0503569	1	0.23027	0.2	0.0657661	1	0.321774	0.208333	0.0485546	0.0661546	0.220055	0.0987654	0.0655355	1	0.320352	0.133333	0.066714	1	0.327635	0.153846	0.116757	1	0.670044	0.444444	0.103094	1	0.570571	0.43662	0.107599	1	0.602906	0.641975	0.0970798	1	0.528131	0.644068	0.107279
b4galt1l	0.0390253	1	0.153229	0.188679	0.0434646	1	0.175041	0.243243	0.0374479	1	0.145638	0.211538	0.0784841	1	0.367326	0.255556	0.0743184	1	0.342752	0.25	0.0558685	1	0.239255	0.135802	0.0747186	1	0.345094	0.133333	0.027923	0.00552397	0.101702	0.0384615	0.0611897	1	0.268173	0.177778	0.109246	1	0.56112	0.464789	0.134125	9.19137e-05	0.732218	0.765432	0.107098	1	0.546924	0.694915	0.142772
alg1	0.106691	1	0.950129	0.773585	0.0680113	1	0.534844	0.567568	0.0503708	1	0.367001	0.442308	0.0452813	0.0377507	0.321486	0.233333	0.0574658	1	0.432692	0.25	0.0426624	0.00537256	0.298616	0.185185	0.0248419	0.00279875	0.154054	0.0888889	0.046914	1	0.335935	0.173077	0.0630767	1	0.486395	0.266667	0.100003	1	0.874134	0.577465	0.0949751	1	0.818096	0.765432	0.123583	0.120611	1.14916	0.847458	0.160085
fdx1	0.136816	2.27849e-06	3.89275	1	0.0552519	1	1.22236	0.783784	0.0604327	1	1.3677	0.903846	0.0486224	1	1.0422	0.611111	0.050043	1	1.08024	0.416667	0.0708965	1	1.67271	0.617284	0.0679554	1	1.58548	0.488889	0.0466945	0.0218419	0.991086	0.403846	0.0630054	1	1.4413	0.666667	0.0646948	1	1.49014	0.732394	0.0806008	1	1.96844	0.925926	0.113673	0.0150707	3.06002	0.983051	0.137915
capn10	0.0781831	1	0.110992	0.169811	0.139683	1	0.234422	0.378378	0.133419	1	0.220808	0.288462	0.0428548	1	0.0522284	0.0666667	0.0630866	1	0.0846155	0.0416667	0.079976	1	0.114239	0.0617284	0.0393769	1	0.0470438	0.0222222	0.0305206	1	0.0344163	0.0192308	0.0392282	1	0.0468249	0.0444444	0.0547502	1	0.0708329	0.0704225	0.102274	1	0.156494	0.185185	0.084771	1	0.123036	0.169492	0.101687
zgc:163030	0.171941	4.02621e-09	1.75678	0.886792	0.0731016	1	0.581703	0.702703	0.135371	0.119036	1.28435	0.769231	0.0974577	1	0.839482	0.555556	0.108904	1	0.968515	0.5	0.112774	1	1.01321	0.358025	0.0383473	1	0.259879	0.111111	0.0135191	6.55567e-05	0.0737435	0.0384615	0.0415937	1	0.287285	0.111111	0.014804	6.60768e-06	0.0821482	0.084507	0.0300087	1	0.192419	0.234568	0.0294107	1	0.187754	0.338983	0.0906072
parn	0.0572001	1	0.512087	0.528302	0.0677969	1	0.634137	0.756757	0.0818494	1	0.805241	0.692308	0.0901547	1	0.910983	0.555556	0.107174	1	1.13762	0.5	0.0856107	1	0.85272	0.320988	0.0458568	0.324168	0.388735	0.177778	0.0283269	7.78278e-05	0.215075	0.134615	0.0526271	1	0.461411	0.355556	0.0687445	1	0.645351	0.521127	0.100192	1	1.04308	0.753086	0.10193	1	1.06641	0.864407	0.117369
nipsnap3a	0.0989448	1	1.73141	0.830189	0.0911316	1	1.55804	0.891892	0.120804	0.0138201	2.2404	0.942308	0.0608801	1	0.934103	0.522222	0.0244863	1	0.303987	0.208333	0.0454898	2.07867e-05	0.649233	0.271605	0.0512512	1	0.753026	0.333333	0.0579041	1	0.877159	0.384615	0.0577654	1	0.874526	0.444444	0.0620582	1	0.956882	0.577465	0.0680614	1	1.07497	0.777778	0.108404	1	1.94746	0.898305	0.146831
phex	0.125456	1	1.07026	0.660377	0.0880664	1	0.678315	0.702703	0.0925058	1	0.722375	0.730769	0.0505858	1	0.336974	0.233333	0.0607911	1	0.42409	0.208333	0.0439404	0.0041686	0.282883	0.135802	0.0373749	1	0.231654	0.111111	0.0677027	1	0.485689	0.192308	0.104581	1	0.845712	0.488889	0.0968575	1	0.766244	0.535211	0.0646494	1	0.458227	0.530864	0.0627508	1	0.441349	0.542373	0.109659
slc25a26	0.134919	1	0.474088	0.471698	0.139933	1	0.497198	0.594595	0.117458	1	0.395955	0.615385	0.0966808	1	0.308047	0.244444	0.0890431	1	0.277219	0.166667	0.010526	1.4384e-05	0.0203349	0.0123457	1.11022e-16	0.0161105	0	0	0.0431483	1	0.111453	0.0769231	0.0214872	1	0.0475824	0.0444444	0.0552303	1	0.151529	0.126761	0.057462	1	0.159234	0.209877	0.0603258	1	0.169253	0.271186	0.133624
fxyd6l	0.152303	3.42205e-06	2.02823	0.886792	0.0876864	1	0.992619	0.810811	0.0903451	1	1.03127	0.653846	0.08285	1	0.92329	0.477778	0.0747881	1	0.810607	0.416667	0.0516945	1	0.509432	0.259259	0.0123912	2.12148e-07	0.0900368	0.0444444	0.0348709	0.0783472	0.31303	0.173077	0.109125	1	1.31462	0.666667	0.0654909	1	0.685347	0.464789	0.0465533	1	0.447165	0.518519	0.0641222	1	0.667348	0.728814	0.117166
si:ch211-137a8.2	0.0960123	1	0.397821	0.471698	0.100592	1	0.422364	0.594595	0.073531	1	0.283095	0.403846	0.0775791	1	0.303017	0.244444	0.0350301	1	0.112323	0.0416667	0.0123517	2.51662e-08	0.032006	0.0246914	0.0163901	0.0180702	0.0448035	0.0222222	0.048021	1	0.165834	0.0769231	0.0982945	1	0.410004	0.288889	0.090555	1	0.369077	0.352113	0.100646	1	0.422654	0.518519	0.0876285	1	0.353893	0.491525	0.149364
st8sia7.1	0.0582164	1	0.629213	0.622642	0.0491426	1	0.509178	0.621622	0.0630862	1	0.696026	0.596154	0.0707535	1	0.804414	0.533333	0.0790152	1	0.925368	0.458333	0.0602811	0.670739	0.657343	0.296296	0.0788211	1	0.922479	0.311111	0.0432104	0.0623074	0.434037	0.211538	0.0579605	1	0.625747	0.377778	0.0863881	1	1.03678	0.661972	0.0801651	1	0.942533	0.753086	0.118267	0.0268492	1.55299	0.932203	0.159327
mcm3l	0.0347092	1	0.38389	0.377358	0.030617	1	0.329256	0.432432	0.0229054	1	0.23148	0.288462	0.0117837	1.23045e-14	0.104637	0.0777778	0.0239314	1	0.244072	0.125	0.0136768	3.39606e-12	0.12484	0.0740741	0.0404288	1	0.463155	0.155556	0.0974464	1	1.40151	0.423077	0.113509	1	1.70607	0.644444	0.102966	1	1.5044	0.676056	0.116447	2.44647e-05	1.76344	0.901235	0.13554	1.45201e-06	2.14803	0.966102	0.197907
cdca9	0.0571687	1	0.879462	0.660377	0.0479087	1	0.705403	0.72973	0.064978	1	1.03297	0.788462	0.0608586	1	0.951258	0.533333	0.0442419	1	0.639027	0.458333	0.0768698	1	1.27769	0.45679	0.0786336	1	1.31506	0.4	0.0660579	1	1.05466	0.461538	0.0691494	1	1.11735	0.577778	0.0893734	1	1.54827	0.71831	0.10308	0.995305	1.85939	0.925926	0.126271	0.000799616	2.41758	0.966102	0.125641
cmtr2	0.0897713	1	0.499621	0.490566	0.0810879	1	0.438788	0.513514	0.0620866	1	0.31299	0.442308	0.059914	1	0.29929	0.233333	0.0368611	1	0.163684	0.125	0.0437489	0.1757	0.202216	0.123457	0.0580591	1	0.28771	0.155556	0.0600517	1	0.300153	0.134615	0.0625871	1	0.316166	0.222222	0.0992696	1	0.568396	0.394366	0.0889174	1	0.493551	0.54321	0.106331	1	0.620973	0.677966	0.155408
CABZ01020840.1	0.105227	1	0.374825	0.377358	0.108925	1	0.391899	0.324324	0.0788985	1	0.259255	0.269231	0.0206142	0.00716573	0.0493905	0.0555556	0.041351	1	0.11538	0.0833333	0.0443124	1	0.12569	0.0617284	0.0167456	1	0.0384943	0.0222222	0.0664002	1	0.208386	0.115385	0.0575416	1	0.174052	0.133333	0.0781645	1	0.256193	0.225352	0.134046	1	0.51295	0.506173	0.115075	1	0.420734	0.491525	0.121512
ddx6	0.0817763	1	6.13135	1	0.0747313	1	5.46799	0.972973	0.0797182	1	5.9356	1	0.0503482	1	3.3284	0.922222	0.0332717	1	1.99539	0.791667	0.0362112	9.92396e-07	2.21378	0.728395	0.0322485	6.481e-09	1.92055	0.488889	0.0284801	1.40248e-07	1.65031	0.615385	0.0545231	1	3.67633	0.888889	0.101286	1	8.06323	1	0.109358	7.87792e-05	8.90084	1	0.134342	1.60362e-06	11.6239	1	0.166874
zgc:171426	0.0435037	1	0.101673	0.169811	0.0553013	1	0.137056	0.216216	0.0474388	1	0.113202	0.192308	0.0241524	0.50738	0.0494849	0.0444444	0.0247419	1	0.0509508	0.0416667	0.0463234	1	0.109906	0.037037	0.0969132	1	0.279036	0.0888889	0.0306582	1	0.0661258	0.0384615	0.109531	1	0.326666	0.2	0.106372	1	0.314556	0.225352	0.115873	1	0.351323	0.382716	0.103953	1	0.30537	0.355932	0.172922
zgc:66443	0.0470441	1	0.172136	0.226415	0.100702	1	0.450389	0.540541	0.0871451	1	0.37419	0.5	0.0944282	1	0.414677	0.322222	0.0340173	1	0.11538	0.0833333	0.0489391	1	0.180799	0.111111	0.0213088	0.354919	0.0653601	0.0444444	0.0360666	1	0.123968	0.0769231	0.099634	1	0.444256	0.333333	0.0922474	1	0.402442	0.28169	0.0982474	1	0.436326	0.506173	0.10536	1	0.477389	0.576271	0.133523
tuba4l	0.0140808	9.79032e-05	0.860177	0.698113	0.0203721	1	1.33776	0.891892	0.0242957	1	1.65452	0.942308	0.019681	6.79945e-09	1.28338	0.655556	0.0189862	1	1.22918	0.666667	0.0236255	1.40067e-07	1.59947	0.580247	0.0224122	6.7463e-06	1.50078	0.422222	0.0413068	1	3.16565	0.788462	0.101926	1	9.88341	1	0.133601	7.29076e-11	14.0312	1	0.155994	3.28578e-22	17.1815	1	0.177561	1.70263e-19	20.3689	1	0.168296
ccnyl1	0.0887005	1	0.386565	0.433962	0.0595402	1	0.233306	0.324324	0.0809368	1	0.34393	0.480769	0.10701	1	0.491911	0.322222	0.0786714	1	0.33173	0.208333	0.0366164	0.000267998	0.127554	0.0617284	0.0176143	0.00880126	0.0525191	0.0222222	0.0204107	0.00790479	0.0626769	0.0384615	0.100761	1	0.455223	0.355556	0.0870043	1	0.377143	0.366197	0.114356	1	0.535962	0.604938	0.0786381	1	0.331551	0.491525	0.128867
tbl2	0.103637	1	1.75722	0.90566	0.0681494	1	1.02954	0.783784	0.0741895	1	1.14633	0.865385	0.0700353	1	1.06567	0.611111	0.0820449	1	1.30275	0.625	0.0822958	1	1.30783	0.54321	0.0855194	1	1.3735	0.444444	0.0646721	1	0.96372	0.442308	0.0471281	0.299223	0.648656	0.333333	0.053832	1	0.765563	0.521127	0.0838775	1	1.33995	0.876543	0.0961557	1	1.59585	0.932203	0.111037
si:dkey-222f8.3	0.133124	1	0.394424	0.433962	0.197811	0.0356058	0.663327	0.567568	0.192606	0.000410323	0.640374	0.557692	0.0346882	1	0.0721087	0.0666667	0.043527	1	0.0953835	0.0833333	0	0.000107748	0	0	0	1	0	0	0.0567119	1	0.132608	0.0769231	0.0305817	1	0.0618054	0.0444444	0.0607186	1	0.144464	0.126761	0.019563	1	0.0359839	0.0617284	0.0692572	1	0.170516	0.305085	0.0849154
pias1b	0.0744447	1	0.152328	0.226415	0.0984297	1	0.217572	0.351351	0.0976681	1	0.215412	0.288462	0.0885434	1	0.189971	0.166667	0.0508913	1	0.0944301	0.0833333	0.0693857	1	0.139343	0.0740741	0.049377	1	0.0909429	0.0444444	0.0658869	1	0.130532	0.0769231	0.059141	1	0.113948	0.0888889	0.104529	1	0.23507	0.225352	0.100193	1	0.222594	0.283951	0.0734205	1	0.149676	0.271186	0.0901033
scnm1	0.0834968	1	0.423916	0.509434	0.0719333	1	0.350774	0.459459	0.0911965	1	0.474484	0.519231	0.103726	1	0.559779	0.422222	0.0582028	1	0.268614	0.208333	0.117764	1	0.659519	0.283951	0.0733607	1	0.359614	0.155556	0.0665628	1	0.318008	0.173077	0.0236923	0.252405	0.0888756	0.0666667	0.0762455	1	0.377644	0.295775	0.0664263	1	0.317185	0.444444	0.0815335	1	0.411255	0.525424	0.102797
akr7a3	0.190102	2.23464e-09	1.29455	0.792453	0.130866	1	0.793364	0.675676	0.110455	1	0.636761	0.615385	0.0445572	1	0.201949	0.211111	0.0726502	1	0.372588	0.291667	0.0271198	0.000748815	0.109815	0.0740741	0.0232259	0.319267	0.0910107	0.0444444	0.0272624	1	0.110517	0.0769231	0.0177446	0.798389	0.0658378	0.0666667	0.050001	1	0.233045	0.211268	0.0589697	1	0.286422	0.320988	0.0837588	1	0.446439	0.508475	0.128532
si:ch211-286b5.4	0.0350859	1	0.129968	0.150943	0.0651219	1	0.280409	0.297297	0.0180657	1	0.0581297	0.115385	0.00903173	0.000227098	0.0255568	0.0222222	0.0162865	1	0.0513502	0.0416667	0.010339	0.00341825	0.0299592	0.0246914	0.186214	1	1.0886	0.422222	0.131007	1	0.686545	0.326923	0.213528	1.2301e-05	1.30435	0.622222	0.0809571	1	0.369427	0.28169	0.0527478	1	0.215275	0.296296	0.0509768	1	0.206296	0.271186	0.056984
blzf1	0.0739887	1	0.360437	0.471698	0.0991347	1	0.523624	0.621622	0.132519	1	0.762293	0.653846	0.0518595	1	0.230542	0.222222	0.0913836	1	0.471696	0.25	0.0577962	1	0.264005	0.148148	0.0456567	1	0.196753	0.0666667	0.0555656	1	0.251307	0.153846	0.101705	1	0.541151	0.266667	0.0710841	1	0.34261	0.295775	0.0579454	1	0.26486	0.37037	0.0803773	1	0.40042	0.542373	0.0980459
med29	0.058946	1	1.08158	0.735849	0.090297	1	1.85665	0.972973	0.101832	1	2.16636	0.980769	0.0680149	1	1.29505	0.7	0.04447	1	0.761129	0.416667	0.0530486	0.169694	0.947885	0.469136	0.0388119	0.0041183	0.643312	0.311111	0.0385915	0.000496033	0.638812	0.326923	0.0386705	0.0273984	0.640424	0.355556	0.0769696	1	1.51465	0.774648	0.103656	0.324929	2.21644	0.938272	0.135008	4.0113e-06	3.12153	0.983051	0.150829
npc2	0.0518047	1	0.626287	0.566038	0.0835111	1	1.14359	0.756757	0.089722	1	1.25331	0.903846	0.0786728	1	1.05992	0.511111	0.0495257	1	0.592139	0.291667	0.0903385	1	1.26434	0.530864	0.0483587	0.315025	0.574826	0.266667	0.0502729	0.195248	0.603286	0.288462	0.0583987	1	0.727537	0.422222	0.087067	1	1.2061	0.676056	0.0886724	1	1.23459	0.876543	0.116912	0.0254699	1.76213	0.966102	0.123817
siva1	0.0243875	6.38203e-08	0.808202	0.716981	0.0272569	0.00127812	0.924946	0.72973	0.0574721	1	2.32162	0.942308	0.0770122	1	3.35847	0.922222	0.0641494	1	2.6654	0.875	0.0540806	0.0316902	2.15145	0.716049	0.0970589	1	4.51288	0.866667	0.0677546	1	2.85566	0.711538	0.0937491	1	4.3164	0.933333	0.103378	1	4.89419	1	0.120229	5.53398e-08	5.94878	1	0.113472	0.00232476	5.51948	1	0.107617
rras	0.123134	1	0.530871	0.566038	0.0824594	1	0.316961	0.459459	0.104528	1	0.42951	0.538462	0.120045	1	0.513656	0.355556	0.046108	1	0.152605	0.125	0.0963818	1	0.386952	0.209877	0.0175483	0.0461865	0.0470537	0.0222222	0.0330922	1	0.101391	0.0576923	0.0426639	1	0.138609	0.0888889	0.0477641	1	0.159443	0.126761	0.0663961	1	0.240831	0.308642	0.0927506	1	0.368356	0.508475	0.125784
pygl	0.0287552	1	0.243269	0.320755	0.0304289	1	0.260641	0.432432	0.0603284	1	0.608015	0.653846	0.117541	1	1.42364	0.611111	0.0928794	1	1.05107	0.5	0.0822422	1	0.89978	0.382716	0.0676965	1	0.702962	0.266667	0.0581519	1	0.580616	0.230769	0.0735058	1	0.780118	0.4	0.0710472	1	0.747224	0.492958	0.0782057	1	0.843963	0.617284	0.0902474	1	1.01308	0.762712	0.155624
mmachc	0.0634157	1	0.391455	0.433962	0.0906714	1	0.616258	0.702703	0.101466	1	0.71195	0.711538	0.0903514	1	0.613476	0.433333	0.133237	1	1.01305	0.5	0.0335207	4.26723e-06	0.177397	0.0987654	0.0402389	0.266479	0.222071	0.0888889	0.0133952	2.42591e-06	0.0587375	0.0384615	0.0331114	1	0.174747	0.133333	0.0852127	1	0.569245	0.422535	0.0829677	1	0.550188	0.617284	0.113762	1	0.82516	0.79661	0.116712
sox21a	0.135258	1	0.805862	0.660377	0.0564407	1	0.263792	0.351351	0.0231361	1	0.0881402	0.173077	0.0398077	1	0.170935	0.133333	0	1	0	0	0.0788626	1	0.402317	0.160494	0.0478967	1	0.214941	0.0888889	0.119164	1	0.683503	0.269231	0.0289283	1	0.115582	0.0888889	0.0599099	1	0.284279	0.211268	0.122011	1	0.704756	0.567901	0.121961	1	0.704384	0.627119	0.14163
nox1	0.138596	1	0.421606	0.509434	0.137612	1	0.417708	0.594595	0.101572	1	0.28183	0.346154	0.0412805	1	0.090604	0.111111	0.0606544	1	0.146325	0.125	0.0275419	0.494636	0.0551784	0.0246914	0.0905897	1	0.24334	0.0888889	0.0350813	1	0.0741533	0.0384615	0.116414	1	0.336082	0.155556	0.0289942	1	0.0587396	0.0704225	0.0418124	1	0.0920488	0.148148	0.0571438	1	0.13578	0.20339	0.115409
si:ch211-59o9.10	0.106489	1	1.1331	0.735849	0.0604889	1	0.551649	0.594595	0.0525488	1	0.462531	0.519231	0.0483617	0.713072	0.41707	0.333333	0.0506609	1	0.441898	0.208333	0.0618918	0.312468	0.567775	0.259259	0.0455774	0.0755027	0.387454	0.155556	0.0680766	1	0.640179	0.346154	0.065619	1	0.611156	0.377778	0.0981026	1	1.01956	0.647887	0.121869	9.31428e-05	1.34914	0.91358	0.105539	1	1.12007	0.830508	0.129437
gdf9	0.0148054	0.0797597	0.0486116	0.0566038	0.00761533	1	0.0221987	0.0540541	0.0167009	1	0.0561231	0.115385	0.0142889	3.57734e-07	0.0466004	0.0444444	0.014873	1	0.0488761	0.0416667	0.00548238	2.0411e-09	0.0151448	0.0123457	0.0212688	0.770522	0.0750108	0.0444444	0.0758834	1	0.36088	0.153846	0.149558	1	0.8656	0.422222	0.143723	1	0.821696	0.507042	0.153685	2.33955e-07	0.897013	0.753086	0.141131	0.000245819	0.802395	0.813559	0.158484
agbl5	0.0698616	1	0.232297	0.339623	0.146704	1	0.603308	0.648649	0.0920825	1	0.330122	0.442308	0.0642223	1	0.20889	0.2	0.0485892	1	0.147328	0.0833333	0.0474042	1	0.142874	0.0864198	0.066259	1	0.217274	0.0666667	0	0.000288005	0	0	0.118336	1	0.456068	0.266667	0.0656305	1	0.214678	0.197183	0.053003	1	0.16419	0.222222	0.0885739	1	0.314112	0.508475	0.134524
si:dkeyp-114g9.1	0.146847	1	0.922209	0.622642	0.0794802	1	0.417661	0.513514	0.0514353	1	0.241441	0.326923	0.0475262	1	0.218814	0.177778	0.123605	1	0.736725	0.333333	0.035449	0.0126678	0.152334	0.0987654	0.0198036	0.0658646	0.0751157	0.0444444	0.0276076	0.0599185	0.112237	0.0576923	0.078527	1	0.411302	0.266667	0.115088	1	0.671604	0.535211	0.101097	1	0.568164	0.604938	0.0676913	1	0.340772	0.440678	0.103577
mbd4	0.140229	1	0.622173	0.584906	0.149184	1	0.674613	0.72973	0.142218	1	0.633723	0.596154	0.139309	1	0.616854	0.488889	0.0806326	1	0.304814	0.25	0.0150558	7.91636e-06	0.0387773	0.0246914	0.0184449	1	0.0494239	0.0444444	0.0116097	0.0146121	0.0284876	0.0192308	0.0428571	1	0.137923	0.111111	0.0783269	1	0.293771	0.253521	0.039386	1	0.12426	0.197531	0.0383136	1	0.120104	0.20339	0.0727101
qtrt1	0.112153	1	0.664617	0.603774	0.113743	1	0.676825	0.702703	0.133067	1	0.829729	0.75	0.107976	1	0.632822	0.411111	0.0803804	1	0.433528	0.291667	0.0852314	1	0.467144	0.222222	0	1.43126e-06	0	0	0.0173336	0.000480898	0.065513	0.0384615	0.0270135	0.209877	0.111847	0.0666667	0.0449528	1	0.208946	0.197183	0.0576542	1	0.28494	0.345679	0.0870113	1	0.479635	0.576271	0.12094
dnajc3a	0.116358	1	0.582908	0.584906	0.0763411	1	0.339551	0.486486	0.07909	1	0.355162	0.442308	0.0779866	1	0.348875	0.288889	0.0583159	1	0.241722	0.166667	0.0831628	1	0.378609	0.209877	0.0387778	1	0.145567	0.0666667	0.0763109	1	0.33938	0.173077	0.0803129	1	0.362162	0.266667	0.0415218	1	0.158382	0.140845	0.0330573	1	0.119652	0.148148	0.111871	1	0.553997	0.491525	0.140929
ssx2ipa	0.104471	1	0.705419	0.622642	0.057915	1	0.333318	0.486486	0.0860025	1	0.549657	0.538462	0.059723	1	0.346423	0.288889	0.0365127	1	0.188014	0.166667	0.0436916	0.00363943	0.234621	0.135802	0.0869875	1	0.557709	0.266667	0.0745578	1	0.458329	0.211538	0.0703183	1	0.425576	0.266667	0.0836478	1	0.530529	0.366197	0.109011	1	0.745206	0.654321	0.0974401	1	0.644952	0.728814	0.113396
calml4b	0.0529528	1	0.141166	0.169811	0.0650784	1	0.182835	0.27027	0.0269812	1	0.0615437	0.0769231	0.00702752	2.15294e-05	0.012436	0.0111111	0.0285897	1	0.0660346	0.0416667	0.0609219	1	0.168264	0.0864198	0.103908	1	0.33187	0.155556	0.0955853	1	0.298096	0.153846	0.171992	1	0.639808	0.377778	0.0759221	1	0.222184	0.225352	0.0752988	1	0.219871	0.320988	0.07696	1	0.226047	0.372881	0.145404
ddx39ab	0.0384195	1	1.97963	0.943396	0.0262128	0.0548198	1.24049	0.837838	0.0502306	1	2.75924	0.980769	0.0646072	1	3.78208	0.966667	0.0784843	1	4.83803	0.958333	0.0470678	1.25456e-05	2.54479	0.703704	0.0553322	1	3.1134	0.711111	0.0435841	0.605811	2.3133	0.75	0.0540092	1	3.0206	0.866667	0.10193	1	6.75878	0.971831	0.129893	1.45089e-13	9.2496	1	0.146086	5.90324e-14	10.7817	1	0.158451
si:ch211-11k18.4	0.13694	0.129009	1.96544	0.867925	0.0730797	1	0.876573	0.702703	0.0946294	1	1.21856	0.846154	0.0967376	1	1.25351	0.688889	0.0755748	1	0.914694	0.416667	0.0922399	1	1.17927	0.45679	0.03305	0.000265626	0.326391	0.133333	0.047961	0.0654805	0.516705	0.211538	0.019786	1.42314e-05	0.175195	0.133333	0.0406339	0.0626029	0.420766	0.323944	0.0623725	1	0.717679	0.703704	0.0999547	1	1.30732	0.915254	0.133503
atp6v1c1b	0.0747629	1	0.132742	0.150943	0.0758549	1	0.135207	0.216216	0.0804094	1	0.145607	0.192308	0.0264039	1	0.0365216	0.0333333	0	1	0	0	0.0555713	1	0.0913494	0.0493827	0.0296821	1	0.0421102	0.0222222	0.151562	1	0.330162	0.192308	0.0955228	1	0.181454	0.155556	0.06944	1	0.120891	0.112676	0.0884367	1	0.164398	0.259259	0.116498	1	0.234366	0.338983	0.128321
si:ch211-207i20.2	0.0980816	1	0.27554	0.339623	0.115455	1	0.340027	0.405405	0.0780431	1	0.205761	0.307692	0.0647504	1	0.162461	0.133333	1.11022e-16	1	0	0	0.0740912	1	0.192627	0.111111	1.11022e-16	0.0124113	0	0	0.0175078	0.240779	0.0326716	0.0192308	0.0564577	1	0.136769	0.111111	0.0945594	1	0.262905	0.239437	0.113601	1	0.332981	0.444444	0.119666	1	0.35618	0.474576	0.147148
synj2bp	0.0699433	1	0.115175	0.169811	0.0722606	1	0.120024	0.216216	0.0955271	1	0.171313	0.25	0.0978279	1	0.176628	0.144444	0.134655	1	0.267064	0.166667	0.0160488	0.384304	0.0189377	0.0123457	1.11022e-16	1	0	0	0.0262843	1	0.034289	0.0192308	0.0535946	1	0.082421	0.0444444	0.0539958	1	0.0831926	0.0704225	0.117136	1	0.222826	0.259259	0.129863	1	0.254753	0.372881	0.120723
si:ch73-204p21.2	0.0315631	1	0.15259	0.226415	0.0429146	1	0.222638	0.351351	0.0331181	1	0.161836	0.25	0.0126233	5.09501e-09	0.0506882	0.0555556	0.029042	1	0.137851	0.0833333	0.0401328	0.0768486	0.204943	0.111111	0.0589302	1	0.330523	0.177778	0.141405	1	1.01366	0.461538	0.185593	0.567833	1.44852	0.622222	0.115768	1	0.781488	0.507042	0.0759577	1	0.455309	0.518519	0.101379	1	0.658461	0.711864	0.108514
tpcn3	0.084378	1	0.152889	0.169811	0.0607021	1	0.10077	0.162162	0.0525488	1	0.0841178	0.115385	0.0833432	1	0.150502	0.155556	0.158477	1	0.34567	0.208333	0.125238	1	0.254202	0.123457	0.065367	1	0.11061	0.0666667	0.11697	1	0.232652	0.0961538	0.0613043	1	0.102027	0.0666667	0.0629796	1	0.105546	0.084507	0.0243244	1	0.0326513	0.0493827	0.0376535	1	0.0556519	0.118644	0.0766583
hebp2	0.0994678	1	0.220564	0.264151	0.0648891	1	0.128067	0.162162	0.102334	1	0.228772	0.346154	0.0776844	1	0.160819	0.144444	0	1	0	0	0.0324731	1	0.054232	0.037037	0.0666236	1	0.132398	0.0666667	0.0546237	1	0.103171	0.0576923	0.0170693	1	0.0249177	0.0222222	0.0667285	1	0.132661	0.126761	0.104774	1	0.235822	0.283951	0.181244	1	0.481927	0.440678	0.117895
nfyal	0.0474964	1	0.181235	0.188679	0.0416019	1	0.153788	0.243243	0.0496034	1	0.191289	0.269231	0.061752	1	0.251606	0.177778	0.033302	1	0.116958	0.0833333	0.0544385	1	0.214826	0.123457	0.0739702	1	0.316014	0.155556	0.0664666	1	0.276033	0.153846	0.079521	1	0.346427	0.266667	0.130816	1	0.657387	0.521127	0.123741	1	0.611545	0.641975	0.137647	0.0662949	0.70247	0.762712	0.11249
map1lc3c	0.0586261	1	1.39002	0.811321	0.0534774	1	1.23894	0.864865	0.0652665	1	1.59079	0.884615	0.055999	1	1.31241	0.644444	0.100237	1	2.74685	0.666667	0.0691045	1	1.70975	0.617284	0.122279	1	3.55105	0.755556	0.0697423	1	1.72972	0.653846	0.063058	1	1.52329	0.711111	0.0781919	1	1.99956	0.816901	0.0856252	1	2.24476	0.938272	0.0991571	1	2.70888	0.983051	0.111627
enc3	0.0944547	1	0.410954	0.45283	0.0912121	1	0.392965	0.513514	0.0814416	1	0.340036	0.461538	0.0963899	1	0.421787	0.3	0.104073	1	0.465505	0.333333	0.0730085	1	0.295955	0.160494	0.0629477	1	0.245425	0.111111	0.0626238	1	0.243837	0.115385	0.0693943	1	0.277538	0.2	0.0537173	1	0.201173	0.169014	0.0614659	1	0.238181	0.259259	0.0584605	1	0.223651	0.372881	0.124678
tradd	0.100223	1	0.726026	0.603774	0.11838	1	0.900116	0.756757	0.1067	1	0.787002	0.75	0.0544151	1	0.334716	0.255556	0.0422214	1	0.244163	0.125	0.0333558	3.15813e-06	0.182688	0.0987654	0.0701053	1	0.460277	0.155556	0.0578458	1	0.36134	0.192308	0.0522863	1	0.31844	0.266667	0.069214	1	0.452892	0.380282	0.0752047	1	0.503089	0.567901	0.103341	1	0.755217	0.711864	0.137119
drap1	0.0795807	1	1.1616	0.792453	0.0729612	1	1.04034	0.810811	0.102051	1	1.59684	0.942308	0.0868131	1	1.29781	0.577778	0.0959871	1	1.47594	0.75	0.0515063	0.000303026	0.671572	0.308642	0.059415	1	0.802979	0.288889	0.0238045	1.17857e-08	0.26038	0.153846	0.042946	1	0.535835	0.333333	0.0703303	1	0.993086	0.690141	0.0935781	1	1.4286	0.876543	0.110536	1	1.77005	0.932203	0.133484
ypel3	0.0508359	1	0.382533	0.471698	0.0751265	1	0.6251	0.675676	0.0935274	1	0.826568	0.711538	0.0769541	1	0.644466	0.466667	0.0655371	1	0.525955	0.333333	0.0577583	0.296597	0.448715	0.246914	0.0545068	0.599002	0.417319	0.155556	0.0650688	1	0.521222	0.25	0.0937344	1	0.828913	0.488889	0.104823	1	0.957013	0.619718	0.108365	1	0.998916	0.753086	0.0894415	1	0.780617	0.779661	0.100252
rnf128a	0.0508826	1	0.491332	0.566038	0.0635338	1	0.648892	0.675676	0.0638171	1	0.652537	0.673077	0.0613153	1	0.62052	0.444444	0.0681031	1	0.708278	0.458333	0.0742207	1	0.789728	0.333333	0.0336954	0.000222198	0.295247	0.111111	0.0286979	6.15603e-06	0.242673	0.115385	0.0846768	1	0.93385	0.511111	0.0866851	1	0.962214	0.535211	0.100149	1	1.15778	0.839506	0.126244	0.005456	1.56185	0.915254	0.170836
kxd1	0.107671	1	0.383667	0.433962	0.131877	1	0.49902	0.675676	0.13404	1	0.509705	0.538462	0.0730025	1	0.233445	0.2	0.0855336	1	0.285544	0.125	0.0552519	1	0.164387	0.0987654	0.118179	1	0.432762	0.177778	0.0746949	1	0.240326	0.134615	0.0533718	1	0.157425	0.111111	0.0225259	0.982542	0.0546177	0.056338	0.0412427	1	0.114287	0.185185	0.0439385	1	0.123598	0.237288	0.0743289
nipa1	0.0478481	1	0.129405	0.207547	0.0822254	1	0.255759	0.405405	0.0443007	1	0.117607	0.192308	0.0936458	1	0.302003	0.222222	0.0512597	1	0.140991	0.0833333	0.0922297	1	0.296163	0.160494	0.045511	1	0.121603	0.0666667	0.053707	1	0.149442	0.0961538	0.057589	1	0.16308	0.133333	0.0818377	1	0.254224	0.28169	0.137201	1	0.494901	0.518519	0.141326	0.335407	0.514408	0.677966	0.0933709
wnt8a	0.0139028	0.144248	0.0518314	0.0754717	0	0.00612921	0	0	0	6.16941e-06	0	0	0.010349	9.80618e-10	0.0365536	0.0222222	0.0140495	1	0.0524817	0.0416667	0.0137572	1.28103e-07	0.0511871	0.0246914	0.0275502	0.904571	0.117889	0.0444444	0.0569495	1	0.288752	0.173077	0.0998018	1	0.588448	0.333333	0.165249	0.0154619	1.13366	0.633803	0.159068	3.06542e-07	1.07832	0.753086	0.186023	3.8403e-11	1.32491	0.898305	0.161018
alg14	0.132924	1	1.0224	0.773585	0.0530112	1	0.316541	0.432432	0.0756932	1	0.49562	0.5	0.0734826	1	0.477336	0.322222	0.0379219	1	0.208962	0.166667	0.0799228	1	0.531075	0.246914	0.074325	1	0.484284	0.244444	0.0695276	1	0.445054	0.230769	0.082373	1	0.551891	0.333333	0.0750236	1	0.490064	0.366197	0.0988729	1	0.697135	0.654321	0.0941499	1	0.654682	0.644068	0.0883562
ptp4a2b	0.0624068	1	1.04739	0.735849	0.0615273	1	1.02887	0.783784	0.0592757	1	0.9818	0.75	0.0807829	1	1.45191	0.688889	0.0801401	1	1.43723	0.625	0.0878948	1	1.61689	0.54321	0.100574	1	1.92181	0.511111	0.0842384	1	1.53151	0.596154	0.062715	1	1.05391	0.577778	0.065351	1	1.10999	0.690141	0.0780173	1	1.38899	0.851852	0.0877079	1	1.6125	0.881356	0.128766
lbx2	0.0621698	1	0.276053	0.320755	0.087576	1	0.42621	0.459459	0.0575532	1	0.250566	0.326923	0.0368547	0.0176415	0.144093	0.1	0.0598508	1	0.263176	0.166667	0.0385654	0.00174286	0.152369	0.0617284	0.0698704	1	0.319847	0.155556	0.0879128	1	0.428306	0.211538	0.086437	1	0.419142	0.288889	0.101723	1	0.516441	0.338028	0.0808192	1	0.384725	0.469136	0.11016	1	0.572313	0.661017	0.147264
rbp1.1	0.0844697	1	0.447172	0.471698	0.0837621	1	0.4424	0.621622	0.0526595	1	0.246334	0.307692	0.03975	0.0474031	0.173768	0.144444	0.0764796	1	0.394051	0.291667	0.021495	1.76639e-07	0.082136	0.0493827	0.0173276	0.00150587	0.0634087	0.0222222	0.0421095	1	0.186594	0.115385	0.0902746	1	0.486803	0.311111	0.111648	1	0.639787	0.408451	0.110619	1	0.632175	0.641975	0.122085	0.226599	0.718289	0.79661	0.153458
aph1b	0.0645423	1	0.581619	0.584906	0.0748258	1	0.701136	0.72973	0.0740326	1	0.691723	0.653846	0.0906272	1	0.89499	0.533333	0.0959862	1	0.963373	0.375	0.0612461	1	0.544493	0.283951	0.0370865	0.00102377	0.291854	0.111111	0.0331677	0.000963336	0.254473	0.153846	0.0510067	1	0.433058	0.244444	0.0986581	1	0.997945	0.56338	0.112853	0.0160171	1.18676	0.888889	0.100379	1	1.02038	0.779661	0.133241
ildr1a	0.0434927	1	0.140029	0.188679	0.071954	1	0.262977	0.405405	0.106456	1	0.433803	0.538462	0.0812708	1	0.306945	0.2	0.157477	1	0.72195	0.375	0.124686	1	0.532277	0.234568	0.0777715	1	0.290233	0.133333	0.0932035	1	0.365649	0.173077	0.0228159	1	0.0636403	0.0666667	0.0139822	0.0919622	0.0354011	0.0422535	0.0319809	1	0.0959251	0.160494	0.0632414	1	0.223439	0.355932	0.115984
mgst1.2	0.192705	0.00279262	0.78428	0.566038	0.111498	1	0.383537	0.486486	0.0873152	1	0.280138	0.346154	0.0341916	1	0.0867065	0.0777778	0.0273545	1	0.0660346	0.0416667	1.11022e-16	1.22234e-06	0	0	1.11022e-16	0.114034	0	0	0.0589069	1	0.170211	0.0769231	0.132909	1	0.481717	0.288889	0.0673938	1	0.201626	0.183099	0.0431822	1	0.115596	0.123457	0.0660292	1	0.196488	0.338983	0.143231
gmcl1	0.0736211	1	0.28744	0.377358	0.116244	1	0.516038	0.513514	0.110746	1	0.484692	0.576923	0.0674607	1	0.257361	0.255556	0.0524662	1	0.187721	0.125	0.0503225	0.380547	0.178205	0.0987654	0.061142	1	0.227377	0.0888889	0.041762	1	0.141393	0.0769231	0.0542764	1	0.195845	0.155556	0.0796585	1	0.317696	0.295775	0.100736	1	0.428972	0.530864	0.102027	1	0.436057	0.59322	0.123165
txndc12	0.0805159	1	0.297337	0.283019	0.0663604	1	0.232729	0.351351	0.0830865	1	0.309481	0.365385	0.0930095	1	0.357481	0.3	0.0976899	1	0.380722	0.25	0.0757416	1	0.275112	0.135802	0.106234	1	0.424103	0.177778	0.0369308	1	0.112182	0.0384615	0.0644885	1	0.224485	0.177778	0.0863855	1	0.325243	0.28169	0.0744842	1	0.269331	0.333333	0.0830153	1	0.309143	0.40678	0.0968377
hmgcl	0.0863667	1	0.434827	0.471698	0.0816708	1	0.404905	0.513514	0.0855751	1	0.429746	0.519231	0.0670246	1	0.315165	0.311111	0.0745104	1	0.360337	0.25	0.0360989	3.88239e-06	0.145878	0.0617284	0.0244186	0.0243328	0.0905646	0.0444444	0.0403977	0.318322	0.167557	0.0769231	0.0586454	1	0.26642	0.2	0.0781743	1	0.38298	0.309859	0.102225	1	0.539727	0.580247	0.145234	0.0103455	0.851251	0.762712	0.141291
pdss1	0.104323	1	0.75345	0.622642	0.0940172	1	0.659168	0.702703	0.117679	1	0.880327	0.826923	0.109121	1	0.798431	0.511111	0.101522	1	0.7275	0.416667	0.0420612	0.00168852	0.239512	0.148148	0.0335364	0.00969008	0.181247	0.0666667	0.0154266	1.56834e-06	0.0709455	0.0384615	0.018567	0.00129235	0.0885379	0.0666667	0.0621785	1	0.389933	0.295775	0.070377	1	0.45586	0.518519	0.0987858	1	0.702387	0.728814	0.144264
zgc:162879	0.0364181	1	0.54045	0.509434	0.0407818	1	0.621304	0.594595	0.0481429	1	0.763138	0.711538	0.045674	0.846161	0.714834	0.5	0.0318418	1	0.45842	0.375	0.0713784	1	1.25069	0.481481	0.0432082	0.09842	0.667323	0.288889	0.0583747	1	0.970763	0.461538	0.0717846	1	1.2597	0.577778	0.109759	1	2.16801	0.859155	0.114133	0.00112847	2.28031	0.962963	0.139217	0.000865481	2.95203	0.983051	0.191095
setmar	0.117361	1	0.723632	0.735849	0.13425	1	0.86175	0.783784	0.103266	1	0.613405	0.692308	0.0731322	1	0.394765	0.3	0.07497	1	0.407384	0.25	0.0820003	1	0.456551	0.197531	0.0814995	1	0.453002	0.222222	0.0719661	1	0.38681	0.173077	0.0357693	1	0.161809	0.133333	0.0459916	1	0.220689	0.183099	0.0646826	1	0.33804	0.382716	0.086496	1	0.488714	0.59322	0.0660701
si:dkeyp-6a3.1	0.0307886	1	0.0470182	0.0754717	0.0505865	1	0.0867402	0.0810811	0.0169921	1	0.0229321	0.0384615	0	0.00453383	0	0	0	1	0	0	0.0129244	1	0.0165562	0.0123457	0.108594	1	0.228522	0.0666667	0.0917364	1	0.183965	0.0961538	0.24914	1	0.679133	0.333333	0.168867	0.840826	0.406285	0.352113	0.0428707	1	0.0706273	0.123457	0.068604	1	0.127124	0.271186	0.0885109
dclre1a	0.0262707	0.0274467	0.26125	0.301887	0.0311086	1	0.320951	0.459459	0.0526508	1	0.614576	0.615385	0.0519412	1	0.604255	0.388889	0.103554	1	1.44879	0.666667	0.0769443	1	0.990908	0.407407	0.124572	1	1.83996	0.555556	0.124831	1	1.84493	0.576923	0.0893094	1	1.19818	0.577778	0.0905808	1	1.22004	0.676056	0.0745228	1	0.951499	0.765432	0.0753462	1	0.964854	0.745763	0.108273
st6galnac1.2	0.0728215	1	0.223114	0.245283	0.0674422	1	0.202479	0.297297	0.027271	1	0.0660083	0.0961538	0.0234327	0.0556957	0.0549221	0.0666667	0	1	0	0	0.0698517	1	0.211661	0.0864198	0.049336	1	0.136836	0.0666667	0.0973365	1	0.323039	0.173077	0.120128	1	0.423802	0.266667	0.0904183	1	0.293905	0.253521	0.0927372	1	0.303591	0.382716	0.139975	1	0.517092	0.542373	0.152582
neil3	0.105083	1	0.765945	0.603774	0.0758091	1	0.504458	0.567568	0.147968	0.0124465	1.19466	0.75	0.098686	1	0.70647	0.5	0.144619	1	1.15942	0.666667	0.0612892	1	0.385661	0.209877	0.0567527	1	0.35019	0.133333	0.0319302	0.242047	0.171895	0.0961538	0.039842	1	0.225599	0.177778	0.0423393	1	0.243191	0.183099	0.0436987	1	0.252891	0.358025	0.0597125	1	0.373241	0.389831	0.11242
b4galnt4b	0.0690754	1	0.236174	0.301887	0.0634618	1	0.212228	0.324324	0.0232744	1	0.0616472	0.115385	0.0568181	1	0.184713	0.133333	0	1	0	0	0.0320491	0.137202	0.0909505	0.0493827	0.0483146	1	0.150877	0.0666667	0.0494714	1	0.155385	0.0576923	0.17566	1	0.788156	0.422222	0.111479	1	0.435392	0.28169	0.0787604	1	0.27891	0.320988	0.102527	1	0.390833	0.423729	0.176509
nabp1b	0.0417973	1	0.252105	0.320755	0.0529207	1	0.337976	0.432432	0.0511443	1	0.323881	0.384615	0.03105	0.000818088	0.174976	0.166667	0.0431816	1	0.262472	0.208333	0.0737314	1	0.512942	0.222222	0.0515527	1	0.327108	0.133333	0.0940973	1	0.700007	0.346154	0.09488	1	0.707482	0.355556	0.0839139	1	0.60464	0.507042	0.101283	1	0.769391	0.679012	0.101707	1	0.773539	0.677966	0.195204
tmem147	0.0436438	1	0.842981	0.660377	0.0404307	1	0.766934	0.72973	0.0407618	0.33186	0.774695	0.615385	0.0560249	0.585424	1.15039	0.622222	0.0674379	1	1.45233	0.708333	0.0924991	1	2.17059	0.716049	0.109136	1	2.68509	0.688889	0.0778568	1	1.74215	0.634615	0.0929908	1	2.18538	0.844444	0.0999706	1	2.39814	0.915493	0.0962465	1	2.28399	0.975309	0.109787	1	2.70579	0.983051	0.11289
pphln1	0.0485254	1	0.312301	0.396226	0.083259	1	0.616275	0.621622	0.120569	1	0.9921	0.807692	0.0613653	1	0.418843	0.288889	0.0625137	1	0.428722	0.291667	0.011529	1.09498e-13	0.0548382	0.037037	0.0273203	0.004583	0.154126	0.0666667	0.0158541	1.66591e-06	0.0800443	0.0384615	0.0796711	1	0.582657	0.355556	0.0888942	1	0.670021	0.478873	0.12557	0.00377601	1.04584	0.790123	0.14434	0.294689	1.25404	0.779661	0.137204
mylk5	0.0603598	1	0.0940582	0.113208	0.191237	0.291622	0.416116	0.540541	0.211699	0.000815513	0.475938	0.519231	0.0849121	1	0.144886	0.133333	1.11022e-16	1	0	0	0.0484033	1	0.0713794	0.0493827	0.0343819	1	0.046788	0.0222222	0.0700558	1	0.113483	0.0576923	0.0569353	1	0.0874136	0.0444444	0.043885	1	0.0632047	0.056338	0.0428582	1	0.0613791	0.0740741	0.0524443	1	0.0788789	0.152542	0.0790438
pdxka	0.0772468	1	0.298268	0.283019	0.109734	1	0.467609	0.486486	0.0691188	1	0.259077	0.326923	0.0983965	1	0.406326	0.311111	0.129794	1	0.581302	0.291667	0.0239317	0.000834203	0.0698862	0.0493827	0.0294839	1	0.0900368	0.0444444	0.0273635	0.440355	0.0822175	0.0384615	0.0651013	1	0.240219	0.155556	0.063313	1	0.231938	0.211268	0.0908559	1	0.366834	0.444444	0.10286	1	0.430184	0.576271	0.137929
tmem251	0.036602	1	0.12078	0.150943	0.0719146	1	0.280424	0.378378	0.084972	1	0.346666	0.365385	0.073145	1	0.286514	0.222222	0.0790226	1	0.316049	0.208333	0.0965738	1	0.408366	0.222222	0.0595411	1	0.221027	0.0888889	0.0595865	1	0.221238	0.134615	0.07479	1	0.294708	0.155556	0.122638	1	0.555901	0.408451	0.119089	1	0.535124	0.555556	0.0913919	1	0.380489	0.457627	0.0775706
CABZ01058650.1	0.107382	1	0.504717	0.54717	0.0955432	1	0.434287	0.540541	0.11764	1	0.567902	0.692308	0.107595	1	0.506006	0.411111	0.0828615	1	0.361984	0.208333	0.106405	1	0.498799	0.283951	0.0787396	1	0.339219	0.155556	0.0836248	1	0.36624	0.173077	0.0765759	1	0.32742	0.244444	0.0442714	1	0.16469	0.169014	0.0410344	1	0.149926	0.222222	0.0395085	1	0.143075	0.237288	0.061152
pitpnaa	0.0537921	1	0.770676	0.641509	0.0534112	1	0.763863	0.675676	0.0759896	1	1.19073	0.807692	0.0791795	1	1.25459	0.644444	0.0761306	1	1.19353	0.625	0.0625896	1	0.931854	0.444444	0.0373124	9.49273e-05	0.489685	0.2	0.0323189	9.09038e-06	0.410551	0.230769	0.0546127	1	0.785399	0.466667	0.100575	1	1.70355	0.802817	0.104523	1	1.79012	0.901235	0.121819	0.00580203	2.18209	0.983051	0.17369
cox16	0.0861087	1	0.35221	0.396226	0.0679795	1	0.260878	0.378378	0.109168	1	0.477647	0.615385	0.103499	1	0.445911	0.322222	0.0917305	1	0.381877	0.208333	0.0446783	0.0314047	0.154315	0.0864198	0.035279	1	0.115313	0.0666667	0.0284645	0.216951	0.0887018	0.0576923	0.0772914	1	0.306939	0.244444	0.0873938	1	0.358938	0.323944	0.101277	1	0.433624	0.481481	0.0995942	1	0.42438	0.542373	0.10834
ecd	0.0697197	1	0.414097	0.415094	0.0939323	1	0.605224	0.756757	0.0910628	1	0.581641	0.692308	0.0716315	1	0.428513	0.311111	0.0713223	1	0.426174	0.291667	0.0522154	0.961446	0.288008	0.17284	0.0500861	1	0.273439	0.0888889	0.0219678	0.000419353	0.0996312	0.0576923	0.0428674	1	0.225398	0.133333	0.0993979	1	0.6508	0.422535	0.0950814	1	0.614736	0.580247	0.119438	1	0.824936	0.694915	0.152891
trmt9b	0.113267	1	0.223596	0.283019	0.0712029	1	0.123464	0.189189	0.0501699	1	0.0795499	0.134615	0.103456	1	0.198922	0.177778	0.0539364	1	0.0870693	0.0833333	0.0681841	1	0.116884	0.0617284	0.0270185	1	0.0371589	0.0222222	0	0.286676	0	0	0.101103	1	0.193118	0.111111	0.0640225	1	0.10796	0.0985915	0.0810185	1	0.145456	0.197531	0.101065	1	0.193025	0.322034	0.177862
si:dkey-81e3.2	0.0600115	1	0.647177	0.45283	0.0596686	1	0.642539	0.567568	0.0645999	1	0.710015	0.634615	0.0689159	1	0.770382	0.444444	0.100363	1	1.24398	0.583333	0.0190418	9.67301e-13	0.158372	0.0864198	0.01658	8.06443e-06	0.13418	0.0666667	0.00599937	2.11344e-11	0.0405495	0.0192308	0.0490139	1	0.502492	0.288889	0.0888907	1	1.06466	0.577465	0.138044	9.10142e-09	1.88002	0.925926	0.152999	1.80374e-07	2.15064	0.932203	0.170576
kmt5aa	0.140658	0.0202374	1.14569	0.811321	0.0682533	1	0.452559	0.567568	0.0804284	1	0.557256	0.596154	0.119968	1	0.931432	0.588889	0.132373	1	1.05849	0.458333	0.0514141	0.0862233	0.31715	0.17284	0.0236722	0.00192522	0.122412	0.0666667	0.0245521	3.67082e-05	0.127939	0.0576923	0.0432103	1	0.255547	0.133333	0.0628847	1	0.408152	0.366197	0.0839799	1	0.588792	0.580247	0.0901347	1	0.644466	0.661017	0.105093
btg2	0.0475715	1	0.310854	0.301887	0.0294625	1	0.17238	0.243243	0.0511454	1	0.340187	0.423077	0.204618	1	2.02467	0.411111	0.0757648	1	0.557667	0.291667	0.13004	1	1.11667	0.469136	0.118255	1	0.987065	0.355556	0.0530828	1	0.356341	0.173077	0.0426522	1	0.271503	0.155556	0.0439363	1	0.281658	0.239437	0.0504464	1	0.334402	0.358025	0.0496792	1	0.328079	0.423729	0.110598
rhbdf1a	0.127698	1	0.349692	0.377358	0.0771196	1	0.182884	0.243243	0.0862391	1	0.21086	0.307692	0.0792316	1	0.189273	0.155556	0.133761	1	0.371454	0.208333	0.0435296	1	0.0892788	0.0617284	0.0374331	1	0.074108	0.0222222	0.0368024	1	0.0725752	0.0384615	0.0342056	1	0.0663388	0.0666667	0.0857453	1	0.209319	0.169014	0.0599663	1	0.133107	0.197531	0.0474719	1	0.0994153	0.169492	0.171241
si:dkey-16l2.16	0.0745966	1	0.497233	0.509434	0.0893907	1	0.626083	0.621622	0.0960028	1	0.686022	0.673077	0.108939	1	0.807237	0.511111	0.110388	1	0.821135	0.458333	0.0433215	0.00108355	0.251704	0.135802	0.0403879	0.902212	0.230806	0.111111	0.0703321	1	0.46151	0.211538	0.0725261	1	0.479806	0.333333	0.0677899	1	0.440531	0.366197	0.0765509	1	0.513821	0.54321	0.0849674	1	0.586781	0.59322	0.11466
lsm11	0.0824778	1	0.625997	0.679245	0.0509208	1	0.340915	0.486486	0.0795352	1	0.597702	0.634615	0.0905615	1	0.705386	0.477778	0.127177	1	1.0931	0.541667	0.0818457	1	0.619891	0.296296	0.0991278	1	0.792081	0.333333	0.106487	1	0.868575	0.384615	0.0340433	0.865977	0.207261	0.133333	0.051067	1	0.342135	0.267606	0.0653256	1	0.465857	0.506173	0.0787767	1	0.590462	0.627119	0.100494
prkd4	0.069299	1	0.157816	0.188679	0.0732735	1	0.169356	0.297297	0.0290458	1	0.0536773	0.0769231	0.0252443	0.514436	0.045265	0.0333333	0.0272885	1	0.0497515	0.0416667	0.0501825	1	0.105262	0.0493827	0	1	0	0	0.182463	1	0.551438	0.269231	0.159075	1	0.460411	0.266667	0.0723575	1	0.166679	0.15493	0.123496	1	0.330838	0.395062	0.0559621	1	0.120611	0.186441	0.12093
stxbp6	0.161895	0.115557	0.561085	0.603774	0.0837886	1	0.239164	0.378378	0.0716607	1	0.196076	0.346154	0.0558044	1	0.143126	0.122222	0.0240964	1	0.0509508	0.0416667	0.0329355	0.0105512	0.0745269	0.037037	0.0539153	1	0.137093	0.0666667	0.0422598	1	0.101278	0.0576923	0.114462	1	0.357044	0.244444	0.0758902	1	0.210859	0.225352	0.100949	1	0.303622	0.382716	0.101599	1	0.30614	0.423729	0.109798
eepd1	0.0918051	1	0.372878	0.415094	0.0730246	1	0.278584	0.378378	0.0595247	1	0.215283	0.326923	0.0665185	1	0.247582	0.233333	0.056125	1	0.199984	0.125	0.0382876	0.000241276	0.124386	0.0493827	0.0834905	1	0.330281	0.155556	0.0611302	1	0.222601	0.115385	0.0631588	1	0.23193	0.155556	0.0936473	1	0.382491	0.295775	0.117279	1	0.511153	0.580247	0.121081	1	0.532736	0.610169	0.122237
tbpl1	0.032213	0.4063	0.20185	0.245283	0.0775393	1	0.603048	0.702703	0.105193	1	0.890973	0.788462	0.0786139	1	0.61369	0.466667	0.0737347	1	0.565748	0.416667	0.101759	1	0.853687	0.419753	0.0985086	1	0.818787	0.355556	0.0939353	1	0.770324	0.326923	0.0643948	1	0.476758	0.288889	0.10154	1	0.851325	0.605634	0.0848818	1	0.676676	0.679012	0.0725804	1	0.55455	0.644068	0.0698506
mospd2	0.123812	1	0.326684	0.358491	0.145299	1	0.40243	0.486486	0.0802578	1	0.187105	0.326923	0.0436725	1	0.0871759	0.1	0.141287	1	0.387972	0.208333	0.0858837	1	0.203981	0.0987654	0.0662281	1	0.146679	0.0666667	0.0199435	1	0.0335187	0.0192308	0.0407584	1	0.0800406	0.0666667	0.0401387	1	0.0785412	0.0704225	0.077153	1	0.177951	0.246914	0.0529323	1	0.110724	0.186441	0.108033
plk1	0.0995507	1	2.45437	0.924528	0.0652832	1	1.43447	0.837838	0.152812	1	4.28093	0.846154	0.107997	1	2.72579	0.677778	0.106127	1	2.66506	0.708333	0.0732256	1	1.65846	0.395062	0.0408048	0.878915	0.7982	0.333333	0.0315779	0.000155136	0.582573	0.269231	0.0421292	1	0.830334	0.466667	0.0459415	1	0.924393	0.507042	0.0672587	1	1.48943	0.864198	0.0950624	1	2.31319	0.966102	0.107444
slc2a10	0.0751463	1	0.206726	0.301887	0.0629033	1	0.165124	0.243243	0.058414	1	0.150458	0.25	0.0603926	1	0.156882	0.144444	0.0718431	1	0.195278	0.125	0.0923063	1	0.268698	0.111111	0.167484	1	0.582402	0.244444	0.117474	1	0.366568	0.211538	0.134902	1	0.438755	0.266667	0.0315869	1	0.0702965	0.0704225	0.0312608	1	0.0694105	0.111111	0.06527	1	0.172987	0.305085	0.0601092
gabpb1	0.0577563	1	0.115766	0.150943	0.051545	1	0.100415	0.189189	0.0846662	1	0.18777	0.307692	0.0616011	1	0.125521	0.133333	0.0847643	1	0.188048	0.125	0.0839858	1	0.185848	0.111111	0.168992	1	0.459904	0.177778	0.0536389	1	0.105532	0.0576923	0.1243	1	0.307823	0.2	0.0684629	1	0.143388	0.112676	0.0226004	1	0.0365315	0.0617284	0.0351439	1	0.0625205	0.135593	0.12917
prmt2	0.0769948	1	0.360373	0.490566	0.0726426	1	0.334735	0.459459	0.106574	1	0.546326	0.653846	0.116516	1	0.613074	0.444444	0.0904616	1	0.442589	0.208333	0.113758	1	0.594355	0.283951	0.0686652	1	0.31172	0.133333	0.0644607	1	0.287836	0.153846	0.0373089	1	0.145733	0.111111	0.0643339	1	0.287124	0.28169	0.0772172	1	0.361696	0.469136	0.0836833	1	0.400674	0.525424	0.0819246
scpep1	0.141175	0.00587911	1.13916	0.830189	0.0699356	1	0.461823	0.567568	0.0864816	1	0.604878	0.557692	0.045686	0.477554	0.270952	0.211111	0.0291092	1	0.155686	0.125	0.0464848	0.00227672	0.276845	0.123457	0.0183321	0.000579464	0.0890431	0.0444444	0.0845889	1	0.588033	0.25	0.104322	1	0.769391	0.4	0.0810387	1	0.556764	0.464789	0.0745987	1	0.501159	0.530864	0.0972055	1	0.702553	0.661017	0.150084
srd5a3	0.112272	1	0.879966	0.716981	0.0795593	1	0.565776	0.702703	0.0954594	1	0.714055	0.673077	0.0678402	1	0.462317	0.344444	0.0646478	1	0.435047	0.291667	0.0613402	0.972525	0.407226	0.222222	0.0409571	0.208013	0.246212	0.133333	0.0412572	0.0278516	0.248441	0.134615	0.0682085	1	0.465489	0.333333	0.107574	1	0.832701	0.549296	0.0998974	1	0.756971	0.728395	0.0989004	1	0.747274	0.779661	0.112935
b3glctb	0.109597	1	0.767826	0.584906	0.101985	1	0.699776	0.648649	0.102364	1	0.703122	0.634615	0.0464964	1	0.25933	0.244444	0.0628114	1	0.377663	0.291667	0.0504079	1	0.286737	0.17284	0.0800673	1	0.513436	0.2	0.0429418	1	0.234985	0.134615	0.0478941	1	0.26905	0.177778	0.0510577	1	0.291351	0.253521	0.066223	1	0.403684	0.506173	0.124591	1	0.906525	0.694915	0.151971
C17H15orf41	0.0519833	1	0.305291	0.283019	0.0421876	1	0.235552	0.351351	0.0669792	1	0.419594	0.423077	0.0428652	0.15706	0.240241	0.188889	0.0620551	1	0.381112	0.25	0.036	1.42441e-05	0.193726	0.0864198	0.0512916	1	0.300233	0.155556	0.032831	0.112538	0.173026	0.0961538	0.0543939	1	0.323072	0.2	0.121888	1	0.90278	0.633803	0.132246	0.0231176	1.00376	0.740741	0.152579	2.73411e-05	1.20992	0.847458	0.168624
sorbs3	0.0690072	1	0.20511	0.245283	0.0993396	1	0.32632	0.324324	0.0318822	1	0.0785835	0.115385	0.021735	0.00069853	0.049356	0.0333333	0.037651	1	0.0963682	0.0833333	0.017176	0.00086828	0.0372027	0.0246914	0.0657145	1	0.192835	0.0888889	0.0611572	1	0.176155	0.0769231	0.115474	1	0.396236	0.311111	0.142317	1	0.519998	0.366197	0.0991159	1	0.325376	0.419753	0.108251	1	0.364499	0.457627	0.15057
elac1	0.102143	1	0.89385	0.603774	0.0885328	1	0.744045	0.72973	0.0773639	1	0.626559	0.634615	0.0850713	1	0.707092	0.455556	0.0798372	1	0.652135	0.458333	0.122573	1	1.13139	0.481481	0.0905139	1	0.765408	0.266667	0.0881643	1	0.740089	0.307692	0.0532039	1	0.390995	0.222222	0.0496351	1	0.358564	0.253521	0.0564639	1	0.421182	0.444444	0.0695045	1	0.547021	0.711864	0.0953688
si:ch73-15b2.5	0.084875	1	0.96874	0.735849	0.0607029	1	0.633743	0.621622	0.0654852	1	0.697202	0.692308	0.0654606	1	0.696872	0.477778	0.0542983	1	0.551101	0.375	0.102047	1	1.22673	0.481481	0.127465	1	1.63571	0.555556	0.104824	1	1.26989	0.538462	0.0953419	1	1.12415	0.577778	0.0530752	1	0.535635	0.408451	0.0598056	1	0.622	0.567901	0.0702121	1	0.761337	0.745763	0.111668
gne	0.0651862	1	0.220639	0.264151	0.0951688	1	0.356977	0.513514	0.0985236	1	0.373212	0.480769	0.0873582	1	0.319909	0.233333	0.106476	1	0.412432	0.291667	0.040424	0.129583	0.121588	0.0617284	0.0639814	1	0.215514	0.111111	0.0377132	1	0.111617	0.0576923	0.053394	1	0.171769	0.0666667	0.0844649	1	0.306445	0.309859	0.0741458	1	0.259648	0.320988	0.100855	1	0.384604	0.440678	0.141881
sc:d0202.1	0.0722447	1	0.154685	0.188679	0.0632484	1	0.130778	0.216216	0.0483746	1	0.0935114	0.173077	0.0949944	1	0.219269	0.1	0	1	0	0	0.0177011	0.00163482	0.0274473	0.0123457	0.0975587	1	0.226895	0.111111	0.0822122	1	0.182282	0.0961538	0.0638909	1	0.132452	0.133333	0.105927	1	0.252239	0.183099	0.128312	1	0.32332	0.382716	0.118096	1	0.290306	0.474576	0.133416
cited4b	0.0885874	1	0.221295	0.301887	0.130781	1	0.365793	0.540541	0.164212	0.0844873	0.492632	0.615385	0.114801	1	0.30887	0.244444	0.0462681	1	0.0976492	0.0833333	0.059962	1	0.134969	0.0987654	0.0213581	1	0.0379568	0.0222222	0	0.00787793	0	0	0.040261	1	0.0822079	0.0444444	0.0663514	1	0.153311	0.112676	0.0860904	1	0.213357	0.197531	0.0712689	1	0.167805	0.288136	0.125469
tigarb	0.175773	3.39477e-12	1.41731	0.924528	0.154863	0.00306965	1.20006	0.864865	0.0976261	1	0.659361	0.653846	0.0967317	1	0.651615	0.466667	0.114208	1	0.807142	0.458333	0.0213704	3.72994e-08	0.099925	0.0617284	0.0343354	0.140841	0.177803	0.0666667	0.0127588	3.08174e-05	0.0539582	0.0384615	0.0151436	0.00135636	0.0661422	0.0444444	0.0411139	1	0.221941	0.183099	0.0685235	1	0.420064	0.45679	0.0827655	1	0.53379	0.576271	0.0896138
mars2	0.101651	1	0.395535	0.358491	0.0685888	1	0.239522	0.351351	0.0868325	1	0.32319	0.5	0.100399	1	0.389282	0.266667	0.0707379	1	0.249049	0.208333	0.03073	0.027526	0.0884087	0.0617284	0.0877209	1	0.327421	0.133333	0.0855883	1	0.317289	0.173077	0.0565347	1	0.187833	0.111111	0.112317	1	0.449862	0.309859	0.0727367	1	0.257991	0.358025	0.0709239	1	0.249878	0.355932	0.113492
ubl3b	0.0818658	1	0.24505	0.301887	0.107107	1	0.345831	0.540541	0.116084	1	0.383739	0.5	0.110253	1	0.359	0.266667	0.100096	1	0.316956	0.166667	0.0433766	0.390306	0.110393	0.0617284	0.0330773	1	0.079069	0.0444444	0.0543553	1	0.146162	0.0769231	0.0253261	1	0.0571136	0.0444444	0.0957434	1	0.299363	0.295775	0.0832773	1	0.250447	0.358025	0.0672929	1	0.191121	0.338983	0.126945
nfkbie	0.180988	0.000124408	0.888318	0.698113	0.133679	1	0.597158	0.621622	0.118489	1	0.510525	0.461538	0.0792203	1	0.304468	0.255556	0.0450624	1	0.149934	0.125	0.0702389	1	0.261375	0.148148	0.0384775	1	0.123342	0.0444444	0.0156816	0.105388	0.0415838	0.0384615	0.0249973	1	0.0728291	0.0444444	0.0388429	1	0.124786	0.126761	0.0513714	1	0.176467	0.246914	0.0774425	1	0.295809	0.440678	0.137492
mbd3a	0.0392255	1	0.371623	0.490566	0.0740775	1	0.822648	0.702703	0.0732895	1	0.811572	0.673077	0.0885346	1	1.03226	0.588889	0.0886143	1	1.03344	0.5	0.0872414	1	1.01303	0.444444	0.0511108	1	0.515938	0.266667	0.0611171	1	0.645341	0.307692	0.0716211	1	0.788244	0.422222	0.100836	1	1.21969	0.605634	0.105746	1	1.29669	0.864198	0.110583	1	1.37373	0.915254	0.108152
crls1	0.0835098	1	0.65364	0.54717	0.0835663	1	0.654205	0.72973	0.0849502	1	0.668055	0.615385	0.105768	1	0.884915	0.577778	0.109782	1	0.928484	0.583333	0.0363017	1.42324e-08	0.230484	0.123457	0.0105829	8.53366e-09	0.0523715	0.0222222	0.0203891	9.37725e-08	0.114316	0.0576923	0.0555755	1	0.390817	0.244444	0.0955652	1	0.776677	0.549296	0.122153	0.093351	1.06612	0.814815	0.108269	1	0.911993	0.847458	0.119111
arpc5b	0.173294	1.92375e-06	1.26015	0.811321	0.141494	1	0.965998	0.810811	0.147567	0.00048246	1.02054	0.826923	0.0964573	1	0.58814	0.411111	0.0641595	1	0.350221	0.208333	0.0564276	1	0.298063	0.135802	0	1.0434e-06	0	0	0.00996105	7.73118e-06	0.036491	0.0192308	0.00660304	0.000147808	0.0225537	0.0222222	0.029682	0.11877	0.134795	0.140845	0.0578603	1	0.307574	0.407407	0.0790912	1	0.456393	0.525424	0.124515
rab5if	0.0796647	1	2.00346	0.943396	0.0775507	1	1.93612	0.918919	0.0987694	1	2.63721	1	0.101794	1	2.74151	0.877778	0.0743363	1	1.83483	0.791667	0.0814654	1	2.06128	0.592593	0.0349318	1.51907e-06	0.715549	0.333333	0.035439	8.99448e-09	0.728322	0.326923	0.0491472	1	1.09111	0.577778	0.0682729	1	1.64752	0.760563	0.0950693	1	2.51105	0.938272	0.119897	0.047523	3.38704	1	0.134513
ntn4	0.131301	1	0.686844	0.622642	0.0789275	1	0.356793	0.486486	0.0530636	1	0.216346	0.288462	0.0523622	1	0.212782	0.2	0.0383757	1	0.144748	0.0833333	0.0603725	1	0.254292	0.123457	0.0998733	1	0.482081	0.177778	0.0994551	1	0.479487	0.173077	0.0974161	1	0.466894	0.311111	0.0584444	1	0.244141	0.225352	0.0705201	1	0.3093	0.407407	0.082179	1	0.375605	0.491525	0.130115
tspan7	0.0524071	1	0.419901	0.45283	0.0850907	1	0.774034	0.702703	0.121116	0.36049	1.21908	0.923077	0.0868519	1	0.794546	0.488889	0.0502577	1	0.398536	0.291667	0.0592979	0.170214	0.490106	0.234568	0.0341667	0.0151651	0.247378	0.133333	0.0472726	0.653279	0.369303	0.192308	0.0460908	1	0.357872	0.222222	0.0630668	1	0.529567	0.408451	0.0875726	1	0.802979	0.753086	0.129834	0.877897	1.33431	0.881356	0.172934
eif1b	0.0551926	1	3.64773	0.981132	0.0587667	1	3.94601	0.972973	0.0787067	1	5.70678	1	0.0734054	1	5.22337	0.944444	0.0585821	1	3.93047	0.916667	0.0677982	1	4.72386	0.864198	0.0551778	0.162551	3.6465	0.8	0.0537673	1	3.53034	0.884615	0.0832526	1	6.12966	1	0.110651	0.602124	8.83083	1	0.122006	4.97825e-10	10.0215	1	0.122194	1.13538e-05	10.0415	1	0.116881
osm	0.110674	1	0.590266	0.54717	0.110157	1	0.586712	0.621622	0.0758603	1	0.363916	0.538462	0.0474907	1	0.202102	0.166667	0.0269274	1	0.100662	0.0833333	0.0590954	1	0.26554	0.123457	0.0101355	0.00111865	0.0313137	0.0222222	0.08378	1	0.412919	0.192308	0.114523	1	0.616944	0.333333	0.0857321	1	0.425234	0.309859	0.0933564	1	0.474192	0.506173	0.129401	0.342101	0.722891	0.745763	0.0941438
arl4d	0.110218	1	0.391026	0.471698	0.0803016	1	0.260542	0.378378	0.0886672	1	0.29565	0.423077	0.0543637	1	0.159298	0.155556	0.0725452	1	0.229018	0.166667	0.0535556	0.513445	0.156344	0.0740741	0.0283337	1	0.0713227	0.0444444	0.0215922	0.0155215	0.0513217	0.0192308	0.0324697	1	0.0842252	0.0666667	0.100011	1	0.344997	0.28169	0.114351	1	0.410086	0.45679	0.14676	0.679583	0.567367	0.644068	0.13149
dnajc15	0.0937374	1	0.855813	0.716981	0.0879916	1	0.789251	0.756757	0.0567204	1	0.45285	0.576923	0.042572	0.00112451	0.316849	0.233333	0.0475863	1	0.363758	0.25	0.0259343	3.55223e-10	0.172668	0.111111	0.0209796	2.23916e-05	0.133637	0.0666667	0.0287876	5.62441e-05	0.196026	0.0961538	0.0585127	1	0.470856	0.288889	0.11311	1	1.09	0.647887	0.13117	0.000139034	1.321	0.864198	0.168989	6.49368e-10	1.84026	0.932203	0.143815
slc25a51b	0.0551753	1	0.329231	0.396226	0.0700177	1	0.444245	0.513514	0.10089	1	0.707859	0.634615	0.0784624	1	0.513243	0.388889	0.110695	1	0.797758	0.416667	0.0773562	1	0.504064	0.259259	0.0495608	1	0.287963	0.133333	0.0511556	0.237224	0.299553	0.115385	0.0472835	1	0.271598	0.177778	0.10486	1	0.743925	0.535211	0.103555	1	0.732014	0.703704	0.0868073	1	0.583788	0.627119	0.124719
bet1l	0.0605673	1	0.503941	0.45283	0.0779773	1	0.693454	0.72973	0.0786573	1	0.70115	0.653846	0.0896156	1	0.828035	0.477778	0.0662571	1	0.564238	0.333333	0.0855262	1	0.780062	0.358025	0.103281	1	0.993472	0.377778	0.0874185	1	0.80217	0.403846	0.0846629	1	0.770029	0.355556	0.0792333	1	0.707685	0.56338	0.0771891	1	0.684561	0.580247	0.0837743	1	0.759735	0.813559	0.0992417
si:dkey-21a6.5	0.0698023	1	0.185454	0.264151	0.0450927	1	0.107314	0.162162	0.0318616	1	0.0699756	0.115385	0.0239574	1	0.049472	0.0555556	0.0489478	1	0.118827	0.0416667	0.0230249	0.105377	0.0471538	0.0246914	0.0459833	1	0.10995	0.0666667	0.148917	1	0.491702	0.269231	0.189132	1	0.67324	0.333333	0.12293	1	0.382948	0.267606	0.0599838	1	0.153209	0.234568	0.107386	1	0.321485	0.474576	0.0976359
sri	0.0424806	1	0.74826	0.679245	0.0595071	1	1.13874	0.918919	0.101318	1	2.23927	0.961538	0.115861	1	2.66248	0.911111	0.0853057	1	1.79628	0.666667	0.0985341	1	2.16048	0.703704	0.0572432	0.00696362	1.08468	0.333333	0.0642595	1	1.25424	0.480769	0.0479522	1	0.869568	0.466667	0.0457835	0.703279	0.82099	0.591549	0.0739045	1	1.49666	0.864198	0.106688	1	2.39332	1	0.152966
ppp4ca	0.0473712	1	0.239716	0.339623	0.0921587	1	0.554953	0.621622	0.0896	1	0.535308	0.615385	0.0609113	1	0.328186	0.277778	0.0741761	1	0.420842	0.25	0.0681843	1	0.378294	0.222222	0.0731007	1	0.413123	0.177778	0.0785034	1	0.452253	0.230769	0.0726688	1	0.410033	0.288889	0.0919527	1	0.553364	0.450704	0.0885635	1	0.527401	0.580247	0.112018	1	0.713363	0.711864	0.119192
si:ch211-15d5.12	0.0872424	1	0.714209	0.679245	0.118609	1	1.06041	0.864865	0.0934598	1	0.77998	0.730769	0.113579	1	1.00255	0.544444	0.10313	1	0.885155	0.5	0.0859009	1	0.700213	0.283951	0.0448359	0.200927	0.309082	0.133333	0.0395608	0.0128587	0.264764	0.134615	0.0294513	0.243598	0.184387	0.177778	0.0621745	1	0.464892	0.394366	0.0743439	1	0.582624	0.62963	0.0927055	1	0.771921	0.661017	0.111361
polr3c	0.117653	1	0.69379	0.622642	0.108187	1	0.62248	0.675676	0.0912708	1	0.500271	0.557692	0.0880284	1	0.477651	0.377778	0.0669613	1	0.337473	0.208333	0.0345835	3.01126e-05	0.148369	0.0987654	0.0175766	0.00124968	0.0653601	0.0444444	0.0606565	1	0.297966	0.173077	0.0525772	1	0.249131	0.177778	0.0807983	1	0.428187	0.309859	0.0970187	1	0.541018	0.555556	0.117845	1	0.695252	0.762712	0.118026
commd9	0.0990082	1	0.787795	0.622642	0.158045	0.156336	1.44621	0.837838	0.144955	0.00183788	1.2914	0.865385	0.09396	1	0.736612	0.455556	0.0608897	1	0.424754	0.291667	0.0606062	1	0.42227	0.209877	0.0256879	0.00675141	0.146461	0.0666667	0.0496251	1	0.328865	0.192308	0.0315296	1	0.187958	0.133333	0.0189195	8.33706e-07	0.101277	0.0985915	0.0608552	1	0.424452	0.506173	0.0949033	1	0.746108	0.661017	0.130411
umps	0.0927151	1	1.92231	0.886792	0.0922709	1	1.91052	0.945946	0.139975	1.26785e-06	3.27516	1	0.106977	1	2.31052	0.833333	0.100293	1	2.12628	0.708333	0.035581	1.69533e-13	0.578609	0.259259	0.0297585	1.00959e-07	0.464963	0.2	0.0347448	1.61405e-06	0.561962	0.269231	0.0392616	0.000755879	0.653108	0.288889	0.0944404	1	1.96828	0.802817	0.0964604	1	2.02246	0.962963	0.0851933	1	1.72519	0.915254	0.102953
sgo1	0.045759	1	0.319873	0.358491	0.0409027	1	0.278397	0.405405	0.0988928	1	0.846262	0.75	0.0578071	1	0.428119	0.233333	0.125189	1	1.14769	0.458333	0.0701814	1	0.546548	0.271605	0.0760808	1	0.605398	0.266667	0.0619264	1	0.466763	0.211538	0.0509312	1	0.365441	0.222222	0.0586813	1	0.436253	0.352113	0.11789	0.178326	1.06164	0.790123	0.125903	0.0089759	1.15621	0.881356	0.124939
slc30a6	0.04361	1	0.146514	0.169811	0.057182	1	0.205325	0.297297	0.107123	1	0.45604	0.557692	0.0692405	1	0.261223	0.277778	0.0307591	1	0.0953835	0.0833333	0.018692	5.47159e-07	0.0522089	0.037037	0.035636	0.841796	0.114219	0.0444444	0.00997791	0.000353337	0.0247719	0.0192308	0.0233412	0.316034	0.0682164	0.0444444	0.100556	1	0.420352	0.309859	0.173454	1.37458e-06	0.854787	0.703704	0.147768	0.536562	0.692655	0.694915	0.179099
acadl	0.136941	0.00594711	1.43967	0.886792	0.095957	1	0.908677	0.72973	0.0962653	1	0.912425	0.730769	0.0556194	1	0.455294	0.3	0.0349377	1	0.25592	0.208333	0.0704671	1	0.613157	0.320988	0.0532449	0.979637	0.431125	0.133333	0.0708738	1	0.617637	0.288462	0.0669549	1	0.574803	0.4	0.0533049	1	0.431732	0.309859	0.0601201	1	0.501942	0.530864	0.0916311	1	0.8565	0.627119	0.164978
ndrg1b	0.0587891	1	0.164262	0.245283	0.123493	1	0.423578	0.594595	0.13184	1	0.461174	0.596154	0.0992761	1	0.319495	0.311111	0.068272	1	0.198284	0.166667	0.0800738	1	0.242703	0.111111	0.0700958	1	0.205002	0.0888889	0.116378	1	0.392209	0.153846	0.085333	1	0.263197	0.133333	0.0624825	1	0.177329	0.183099	0.0165323	0.304337	0.0348275	0.0740741	0.0834405	1	0.255774	0.355932	0.0617703
abcd4	0.0515843	1	0.175345	0.207547	0.0651955	1	0.23518	0.297297	0.0467543	1	0.155152	0.25	0.0789127	1	0.299491	0.277778	0.0580511	1	0.203252	0.125	0.0775644	1	0.293002	0.160494	0.0714796	1	0.264166	0.111111	0.058032	1	0.203168	0.115385	0.0213225	1	0.059411	0.0666667	0.131873	1	0.579941	0.408451	0.129726	1	0.567685	0.567901	0.119526	1	0.510404	0.59322	0.138586
gda	0.0641493	1	0.217077	0.283019	0.0827938	1	0.299911	0.324324	0.111634	1	0.440127	0.519231	0.0839996	1	0.305491	0.211111	0.103242	1	0.397921	0.25	0.141859	1	0.600887	0.271605	0.0689262	1	0.237664	0.111111	0.0861283	1	0.315404	0.153846	0.0654822	1	0.222776	0.111111	0.0177339	0.0443058	0.0448548	0.0422535	0.0414002	1	0.125717	0.197531	0.0821983	1	0.297165	0.355932	0.108936
gnai2b	0.0512082	1	0.187357	0.264151	0.0332308	1	0.10981	0.189189	0.0375152	1	0.127437	0.192308	0.0783332	1	0.319929	0.255556	0.152343	1	0.755044	0.375	0.0511074	1	0.186898	0.111111	0	0.000771387	0	0	0.0257426	1	0.0804455	0.0576923	0.190632	0.112783	1.01399	0.577778	0.127237	1	0.596901	0.43662	0.0845262	1	0.35248	0.419753	0.0904373	1	0.384275	0.40678	0.091889
cdcp1a	0.0895622	1	0.279018	0.358491	0.0552551	1	0.151467	0.27027	0.0661261	1	0.189799	0.25	0.048287	1	0.128026	0.144444	0.0588086	1	0.163768	0.125	0.0400453	0.139063	0.101535	0.0493827	0.121738	1	0.414356	0.155556	0.116767	1	0.39256	0.211538	0.0474404	1	0.125242	0.0666667	0.0619971	1	0.174997	0.169014	0.0865013	1	0.266889	0.37037	0.129042	1	0.446943	0.576271	0.136038
eif2b3	0.110269	1	1.26937	0.773585	0.0721414	1	0.737775	0.702703	0.0866506	1	0.931395	0.692308	0.10463	1	1.18626	0.633333	0.0660916	1	0.660472	0.458333	0.0831526	1	0.883691	0.358025	0.098896	1	1.10327	0.377778	0.0719871	1	0.735777	0.326923	0.0440787	1	0.398099	0.288889	0.0570434	1	0.548889	0.43662	0.0843854	1	0.900431	0.765432	0.081624	1	0.863045	0.762712	0.1136
cdc16	0.0665356	1	0.383483	0.396226	0.0491505	1	0.26239	0.459459	0.103091	1	0.670063	0.653846	0.101779	1	0.659104	0.466667	0.117263	1	0.791335	0.416667	0.0916201	1	0.575878	0.271605	0.0301205	0.0255072	0.143529	0.0666667	0.0820982	1	0.500566	0.25	0.0408502	1	0.20862	0.133333	0.0769312	1	0.460842	0.338028	0.098906	1	0.635274	0.604938	0.0873046	1	0.541414	0.661017	0.119427
rell1	0.0752164	1	0.622434	0.566038	0.0646508	1	0.514021	0.594595	0.0906263	1	0.789288	0.634615	0.0401809	0.0176094	0.284098	0.244444	0.025407	1	0.162191	0.0833333	0.0131298	2.09927e-14	0.0735114	0.0493827	0.0152217	1.06144e-05	0.0876354	0.0444444	0.00587992	9.61722e-10	0.02865	0.0192308	0.0832712	1	0.708405	0.422222	0.144826	1	1.4476	0.704225	0.135042	0.00143573	1.32127	0.802469	0.16486	2.69921e-08	1.71551	0.915254	0.147143
ddx19	0.0610293	1	0.611008	0.509434	0.0644367	1	0.654233	0.756757	0.0645587	1	0.655794	0.596154	0.0885392	1	0.979171	0.6	0.0762266	1	0.80912	0.375	0.0459231	6.97035e-05	0.428375	0.246914	0.0317403	0.000133991	0.271804	0.133333	0.0516209	0.668073	0.495471	0.25	0.0572435	1	0.563831	0.355556	0.129913	1	1.60568	0.802817	0.122144	1	1.48203	0.82716	0.131288	0.0290706	1.62783	0.898305	0.130692
ccnh	0.0308011	1	0.6223	0.698113	0.060434	1	1.43344	0.864865	0.0710575	1	1.75809	0.903846	0.0589528	1	1.38948	0.666667	0.0429675	1	0.93692	0.583333	0.0419541	2.67303e-09	0.909665	0.345679	0.0380566	7.37644e-05	0.806561	0.288889	0.0482156	0.500235	1.0809	0.442308	0.0927174	1	2.467	0.777778	0.129631	0.0241921	3.80288	0.929577	0.110015	0.0243741	3.07423	0.975309	0.135001	0.00163449	4.00933	0.966102	0.177658
rfwd3	0.125636	1	0.423815	0.45283	0.078231	1	0.230544	0.324324	0.128589	1	0.436809	0.538462	0.107629	1	0.346886	0.266667	0.106139	1	0.340704	0.25	0.0359069	0.054738	0.0871607	0.0493827	1.11022e-16	0.00562845	0	0	0.0653438	1	0.183571	0.115385	0.0204024	1	0.0438494	0.0444444	0.0694999	1	0.19843	0.15493	0.109051	1	0.352811	0.45679	0.101681	1	0.322382	0.389831	0.0929861
adgrg1.1	0.155838	1	0.46527	0.528302	0.113716	1	0.308641	0.513514	0.0790552	1	0.193617	0.307692	0.0829099	1	0.205715	0.166667	0.0840644	1	0.209374	0.166667	0.0399312	1	0.0823223	0.0617284	0.108191	1	0.289404	0.133333	0.0700289	1	0.166025	0.0961538	0.0353616	1	0.0708861	0.0666667	0.0269277	1	0.0508223	0.056338	0.0624795	1	0.143778	0.17284	0.0721991	1	0.172562	0.305085	0.122256
them6	0.0769933	1	0.945577	0.698113	0.0918458	1	1.18413	0.837838	0.0785148	1	0.969384	0.730769	0.0681758	1	0.81058	0.466667	0.0516033	1	0.571476	0.375	0.0329928	3.01793e-10	0.32884	0.185185	0.0680963	1	0.809387	0.355556	0.0551305	0.325465	0.620675	0.25	0.0932892	1	1.20802	0.511111	0.0991808	1	1.3068	0.71831	0.0953575	1	1.24247	0.851852	0.116491	1	1.60822	0.864407	0.138922
gtf3c6	0.0705013	1	1.23583	0.811321	0.0731824	1	1.29563	0.891892	0.0864332	1	1.60109	0.903846	0.0807527	1	1.46817	0.711111	0.0745634	1	1.3267	0.541667	0.0603179	0.00750175	1.01523	0.407407	0.0513788	0.00254256	0.830594	0.266667	0.0369288	0.000114133	0.551818	0.307692	0.0370955	0.000862972	0.554884	0.311111	0.101535	1	1.96818	0.830986	0.127167	2.21122e-05	2.63336	0.962963	0.120945	0.0379116	2.46728	0.966102	0.139456
[truncated: 404 more rows]
[truncated: 7 more columns]
