# Supplementary figures and images for: Single-cell transcriptomes of zebrafish germline reveal progenitor types and feminization by Foxl2l
Source: eLife journal article supplement (doi:10.7554/elife.100204), 2025-06-11

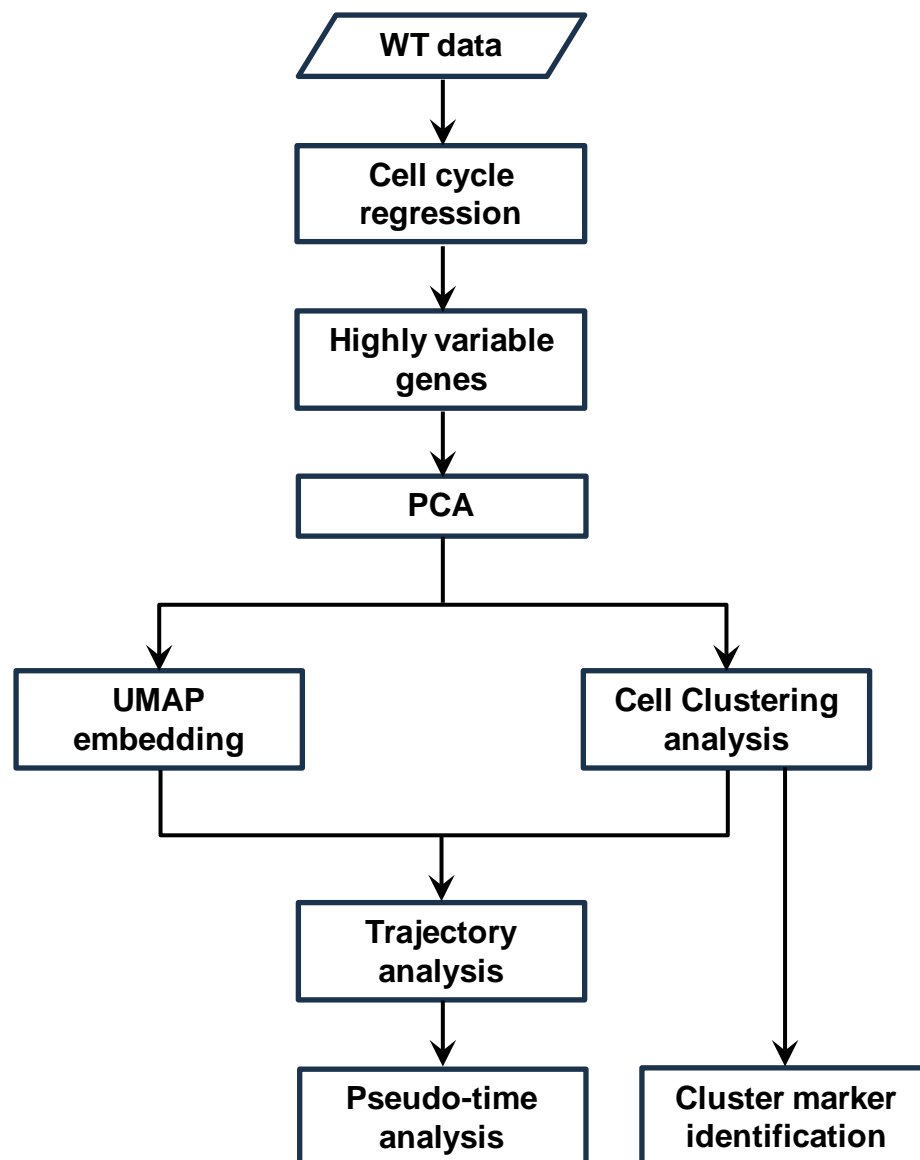

Figure 3—Figure Supplement 4. The flow chart of cell clustering analysis for WT cells

Supplement: supp [file elife-100204-supp-v1.zip]
